# Supplementary material for: Modeling Phenotypic Metabolic Adaptations of Mycobacterium tuberculosis H37Rv under Hypoxia
Source: PLoS Comput Biol. 2012 Sep 13;8(9):e1002688. doi: 10.1371/journal.pcbi.1002688 (PMC3441462; doi:10.1371/journal.pcbi.1002688)
Supplement: Protocol S1 — MATLAB-formatted models of metabolism for M. tuberculosis HR37v and its Δ dosR deletion mutant. (ZIP) [file pcbi.1002688.s001.zip]

Archive with 16 entries (16 files):
- genelistdosRKO_relative061012.m
- genelistdosRWT_relative061012.m
- iNJ661m_SBML.xml
- lpxf_b1.m
- read_ref_fluxes.m
- runloopless1_new.m
- bnb_milp013112.m
- dosRKO_induce_exp_gene_list.txt
- dosRKO_induce_exp_ratio_list.txt
- dosRKO_repress_exp_gene_list.txt
- dosRKO_repress_exp_ratio_list.txt
- dosRWT_induce_exp_gene_list.txt
- dosRWT_induce_exp_ratio_list.txt
- dosRWT_repress_exp_gene_list.txt
- dosRWT_repress_exp_ratio_list.txt
- README.pdf
