# Supplementary material for: Modeling Phenotypic Metabolic Adaptations of Mycobacterium tuberculosis H37Rv under Hypoxia
Source: PLoS Comput Biol. 2012 Sep 13;8(9):e1002688. doi: 10.1371/journal.pcbi.1002688 (PMC3441462; doi:10.1371/journal.pcbi.1002688)
Supplement: Protocol S1 — MATLAB-formatted models of metabolism for M. tuberculosis HR37v and its Δ dosR deletion mutant. (ZIP) [file pcbi.1002688.s001.zip › bnb_milp013112.m]

function [xopt, bnb_fmin, bnb_status, bnb_time, bnb_lambda ] = bnb_milp092711 (milp_c, milp_a, milp_b, milp_lb, milp_ub, milp_ctype, milp_vartype, milp_sense,params, show_num)
% Note: this program can only solve problems with binary variables, but not
% those with other integer variables

% using the Brach and Bound method
ind_Bvar = find(milp_vartype=='B');
addint_num = length(ind_Bvar);
bnb_t0 = cputime;
bnb_finish = 0; % notation to finish bnb search
bnb_var = zeros(addint_num,1); % list of variables in bnb tree
bnb_v01 = zeros(addint_num,1); % list of binary values in bnb tree
bnb_dpt = 0; % depth of bnb tree
bnb_upper = Inf; % upper limit of bnb tree
bnb_xopt = zeros(length(milp_c),1); % recorded optimal solution 
bnb_status = 0; % whether there is a solution 
bnb_lambda = zeros(length(milp_ctype),1);
% 0 - solution not found; 5 - solution found
milp_lb1 = milp_lb; 
for i = 1:length(ind_Bvar)
    milp_lb1(ind_Bvar(i)) = max(0,milp_lb(ind_Bvar(i)));
end;
milp_ub1 = milp_ub; 
for i = 1:length(ind_Bvar)
    milp_ub1(ind_Bvar(i)) = min(1,milp_ub(ind_Bvar(i)));
end;
bnb_iter = 0;
while bnb_finish==0
    bnb_iter = bnb_iter+1;
    if show_num~=-1
        [ 99 0.5.^(1:addint_num)*bnb_v01 cputime-bnb_t0 show_num ]
    end;
    %[ bnb_iter bnb_var'; bnb_dpt bnb_v01']
        
    bnb_node_finish = 0; % whether this node is terminted
    
    % construct LP prblem
    if bnb_dpt==0
        bnb_fixedv = bnb_var(1:bnb_dpt);
        bnb_nofixv = setdiff(1:length(milp_c),bnb_fixedv);
        milp_a2 = milp_a;
        milp_b2 = milp_b;
        milp_c2 = milp_c;
        milp_lb2 = milp_lb1;
        milp_ub2 = milp_ub1;
    else
        bnb_fixedv = bnb_var(1:bnb_dpt);
        bnb_nofixv = setdiff(1:length(milp_c),bnb_fixedv);
        milp_a2 = milp_a(:,bnb_nofixv);
        milp_b2 = milp_b-milp_a(:,bnb_fixedv)*bnb_v01(1:bnb_dpt);
        milp_c2 = milp_c(bnb_nofixv);
        milp_lb2 = milp_lb1(bnb_nofixv);
        milp_ub2 = milp_ub1(bnb_nofixv);
    end;
    milp_vartype2 = 'C';
    for i = 1:length(milp_c2)
        milp_vartype2(i) = 'C';
    end;
    
    % solve the LP problem
    [xopt2, fmin, status, extra] = lpxf_b1 (milp_c2, milp_a2, milp_b2, milp_lb2, milp_ub2, milp_ctype, milp_vartype2, milp_sense,params);
    
    
    if status==5 || status==180
        %solution exists for the LP problem
        
        % check whether all potential integer variables really have integer
        % value
        if bnb_dpt==length(bnb_var)
            int_found = 1;
        else
            if bnb_dpt == 0
                nofixedint = ind_Bvar;
                ind_nfint = ind_Bvar;
            else
                [ nofixedint ind_nfint ] = intersect(bnb_nofixv,ind_Bvar);
            end;
            %if max(max(abs(xopt2(ind_nfint))),max(abs(xopt2(ind_nfint)-1)))<=1e-8
            if max(min([ abs(xopt2(ind_nfint))'; abs(xopt2(ind_nfint)-1)' ]))<=1e-8
                int_found = 1; % whether a set of integer solution found
            else
                int_found = 0;
            end;
        end;
        
        % further dealing with the solution
        if int_found==1
            % an integer solution found
            bnb_node_finish = 1;
            % record the solution
            if fmin<bnb_upper-1e-8
                bnb_status = 5;
                bnb_upper = fmin;
                bnb_xopt(bnb_nofixv) = xopt2;
                bnb_xopt(bnb_var(1:bnb_dpt)) = bnb_v01(1:bnb_dpt);
                if bnb_dpt~=length(bnb_var)
                    bnb_xopt(nofixedint) = round(xopt2(ind_nfint));
                end;
                bnb_lambda = extra.lambda;
            end;
        else
            % some integer variable is still non-integer
            if fmin < bnb_upper-1e-8
                % the node is smaller than the upper bound, and further
                % branch should be done
                
                % find the next variable
                [ next_val next_var ] = min(abs(xopt2(ind_nfint)-0.5));
                bnb_dpt = bnb_dpt+1;
                bnb_var(bnb_dpt) = nofixedint(next_var);
                bnb_v01(bnb_dpt) = 0;
            else
                % the node is greater than the upper bound, and no further
                % branch is necessary
                bnb_node_finish = 1;
            end;
            
        end;
    else
        % no solution for the LP problem
        bnb_node_finish = 1;
    end;
    
    % if no further branch is to be done
    if bnb_node_finish==1 && bnb_dpt~=0
        while bnb_dpt~=0 && bnb_v01(bnb_dpt)==1
                bnb_var(bnb_dpt) = 0;
                bnb_v01(bnb_dpt) = 0;
                bnb_dpt = bnb_dpt-1;
        end;
        if bnb_dpt~=0
            bnb_v01(bnb_dpt) = 1;
        end;
    end;
    
    % if dpt==1 then finish all process
    if bnb_dpt==0
        bnb_finish = 1;
    end;
end;

% assign out outputs
xopt = bnb_xopt;
bnb_fmin = bnb_upper;
bnb_time = cputime-bnb_t0;
