# Supplementary material for: Modeling Phenotypic Metabolic Adaptations of Mycobacterium tuberculosis H37Rv under Hypoxia
Source: PLoS Comput Biol. 2012 Sep 13;8(9):e1002688. doi: 10.1371/journal.pcbi.1002688 (PMC3441462; doi:10.1371/journal.pcbi.1002688)
Supplement: Protocol S1 — MATLAB-formatted models of metabolism for M. tuberculosis HR37v and its Δ dosR deletion mutant. (ZIP) [file pcbi.1002688.s001.zip › dosRKO_induce_exp_gene_list.txt]

Rv0015c
Rv0023
Rv0046c
Rv0047c
Rv0135c
Rv0136
Rv0185
Rv0186
Rv0190
Rv0206c
Rv0242c
Rv0243
Rv0282
Rv0283
Rv0284
Rv0285
Rv0286
Rv0287
Rv0288
Rv0289
Rv0290
Rv0291
Rv0333
Rv0336
Rv0341
Rv0410c
Rv0411c
Rv0412c
Rv0467
Rv0475
Rv0486
Rv0509
Rv0510
Rv0511
Rv0512
Rv0513
Rv0514
Rv0515
Rv0524
Rv0525
Rv0526
Rv0527
Rv0528
Rv0530
Rv0532
Rv0578c
Rv0605
Rv0606
Rv0641
Rv0676c
Rv0677c
Rv0678
Rv0747
Rv0803
Rv0808
Rv0818
Rv0822c
Rv0823c
Rv0824c
Rv0827c
Rv0829
Rv0832
Rv0847
Rv0859
Rv0860
Rv0869c
Rv0870c
Rv0872c
Rv0878c
Rv0885
Rv0886
Rv0922
Rv0939
Rv1013
Rv1066
Rv1087
Rv1091
Rv1095
Rv1128c
Rv1129c
Rv1130
Rv1131
Rv1161
Rv1162
Rv1165
Rv1177
Rv1178
Rv1195
Rv1215c
Rv1216c
Rv1217c
Rv1218c
Rv1219c
Rv1223
Rv1224
Rv1227c
Rv1229c
Rv1243c
Rv1245c
Rv1277
Rv1336
Rv1344
Rv1377c
Rv1380
Rv1381
Rv1386
Rv1387
Rv1406
Rv1410c
Rv1411c
Rv1449c
Rv1452c
Rv1460
Rv1461
Rv1464
Rv1465
Rv1539
Rv1576c
Rv1577c
Rv1592c
Rv1593c
Rv1594
Rv1595
Rv1599
Rv1600
Rv1604
Rv1605
Rv1627c
Rv1638
Rv1652
Rv1714
Rv1765c
Rv1779c
Rv1797
Rv1818c
Rv1831
Rv1840c
Rv1841c
Rv1842c
Rv1845c
Rv2015c
Rv2048c
Rv2052c
Rv2053c
Rv2064
Rv2092c
Rv2108
Rv2126c
Rv2153c
Rv2154c
Rv2157c
Rv2158c
Rv2159c
Rv2160c
Rv2161c
Rv2162c
Rv2172c
Rv2225
Rv2243
Rv2244
Rv2245
Rv2246
Rv2247
Rv2325c
Rv2326c
Rv2365c
Rv2366c
Rv2367c
Rv2393
Rv2444c
Rv2455c
Rv2490c
Rv2524c
Rv2539c
Rv2540c
Rv2552c
Rv2553c
Rv2554c
Rv2578c
Rv2590
Rv2591
Rv2593c
Rv2630
Rv2678c
Rv2710
Rv2719c
Rv2728c
Rv2729c
Rv2736c
Rv2737c
Rv2739c
Rv2749
Rv2782c
Rv2790c
Rv2792c
Rv2837c
Rv2838c
Rv2839c
Rv2846c
Rv2851c
Rv2852c
Rv2885c
Rv2900c
Rv2930
Rv2931
Rv2932
Rv2933
Rv2934
Rv2935
Rv2936
Rv2940c
Rv2942
Rv2946c
Rv2947c
Rv2948c
Rv2949c
Rv2974c
Rv2977c
Rv2978c
Rv2979c
Rv3049c
Rv3074
Rv3085
Rv3088
Rv3089
Rv3093c
Rv3094c
Rv3135
Rv3139
Rv3140
Rv3160c
Rv3161c
Rv3201c
Rv3202c
Rv3211
Rv3212
Rv3220c
Rv3223c
Rv3256c
Rv3285
Rv3296
Rv3297
Rv3306c
Rv3337
Rv3338
Rv3367
Rv3395c
Rv3411c
Rv3419c
Rv3421c
Rv3422c
Rv3429
Rv3508
Rv3512
Rv3524
Rv3550
Rv3551
Rv3552
Rv3561
Rv3562
Rv3563
Rv3580c
Rv3581c
Rv3585
Rv3602c
Rv3603c
Rv3605c
Rv3606c
Rv3607c
Rv3608c
Rv3609c
Rv3610c
Rv3627c
Rv3645
Rv3653
Rv3660c
Rv3682
Rv3709c
Rv3799c
Rv3800c
Rv3801c
Rv3804c
Rv3825c
Rv3841
Rv3854c
Rv3870
Rv3871
Rv3873
Rv3879c
Rv3918c
