# Supplementary material for: Modeling Phenotypic Metabolic Adaptations of Mycobacterium tuberculosis H37Rv under Hypoxia
Source: PLoS Comput Biol. 2012 Sep 13;8(9):e1002688. doi: 10.1371/journal.pcbi.1002688 (PMC3441462; doi:10.1371/journal.pcbi.1002688)
Supplement: Protocol S1 — MATLAB-formatted models of metabolism for M. tuberculosis HR37v and its Δ dosR deletion mutant. (ZIP) [file pcbi.1002688.s001.zip › dosRKO_induce_exp_ratio_list.txt]

2.2
1.8
3.9
4.5
2.8
2.0
2.1
1.9
2.0
1.9
2.1
2.5
3.3
2.7
2.2
2.4
2.5
1.8
1.8
1.9
3.0
2.9
1.8
3.7
2.1
2.2
3.4
2.6
2.5
2.4
3.2
2.1
1.9
3.2
2.9
2.7
2.2
4.2
1.8
2.0
2.9
2.7
3.5
1.8
2.0
2.2
2.5
2.4
1.8
6.6
6.5
4.1
2.2
1.9
1.9
1.9
1.9
3.1
1.8
2.1
3.6
1.9
1.9
2.2
2.2
1.9
1.9
2.2
2.0
5.3
4.3
1.8
1.9
1.8
1.8
2.3
2.9
2.3
1.9
2.1
9.4
2.9
2.4
2.8
1.9
2.1
1.9
3.3
2.5
8.3
13.3
5.2
2.5
2.0
2.2
2.2
1.8
2.0
2.7
1.8
1.8
2.0
2.2
1.9
2.0
2.1
2.1
1.9
2.0
1.9
1.9
2.2
2.2
2.4
2.6
2.2
1.9
2.3
1.8
2.9
1.9
3.1
3.3
2.1
1.8
2.0
1.8
1.9
1.8
2.1
1.8
1.9
3.4
2.2
1.8
1.9
2.1
1.8
2.5
1.8
2.2
2.2
3.7
2.2
2.0
1.8
2.5
1.9
2.4
1.9
2.2
2.2
1.9
2.2
2.1
2.5
2.0
2.5
4.0
3.4
3.2
3.6
4.4
1.8
2.6
2.7
1.8
1.8
2.3
1.9
2.4
2.4
3.9
2.8
3.2
2.2
2.5
2.1
1.9
2.0
2.3
2.2
2.0
1.8
2.6
2.1
1.9
2.6
2.2
3.9
2.0
1.8
2.1
2.1
2.8
2.8
2.9
2.3
2.9
2.2
2.2
2.0
1.9
3.1
4.2
4.3
5.2
3.4
1.9
2.1
3.0
1.8
4.3
2.3
2.1
1.9
2.0
2.3
3.0
2.7
3.2
3.1
3.3
2.3
2.0
3.0
2.2
1.9
2.1
2.8
3.1
2.1
1.8
3.2
2.2
3.3
1.8
2.0
1.9
2.0
2.1
2.2
2.1
3.4
2.6
2.0
1.9
2.3
2.4
1.9
2.6
2.3
2.6
2.8
1.8
1.9
3.1
2.4
2.4
1.9
2.3
1.9
1.9
2.8
2.0
3.1
2.0
2.1
2.3
3.4
1.9
2.0
1.9
1.8
1.8
2.1
1.9
2.6
2.0
2.1
2.5
1.8
1.8
2.3
2.4
2.0
1.9
2.5
2.9
2.0
