# Supplementary material for: Modeling Phenotypic Metabolic Adaptations of Mycobacterium tuberculosis H37Rv under Hypoxia
Source: PLoS Comput Biol. 2012 Sep 13;8(9):e1002688. doi: 10.1371/journal.pcbi.1002688 (PMC3441462; doi:10.1371/journal.pcbi.1002688)
Supplement: Protocol S1 — MATLAB-formatted models of metabolism for M. tuberculosis HR37v and its Δ dosR deletion mutant. (ZIP) [file pcbi.1002688.s001.zip › dosRKO_repress_exp_gene_list.txt]

Rv0033
Rv0035
Rv0042c
Rv0070c
Rv0081
Rv0084
Rv0087
Rv0088
Rv0108c
Rv0111
Rv0140
Rv0144
Rv0164
Rv0166
Rv0168
Rv0169
Rv0170
Rv0171
Rv0172
Rv0173
Rv0174
Rv0178
Rv0246
Rv0247c
Rv0348
Rv0356c
Rv0404
Rv0405
Rv0440
Rv0516c
Rv0581
Rv0582
Rv0608
Rv0642c
Rv0655
Rv0703
Rv0717
Rv0748
Rv0760c
Rv0772
Rv0920c
Rv1016c
Rv1079
Rv1102c
Rv1114
Rv1182
Rv1183
Rv1184c
Rv1221
Rv1280c
Rv1281c
Rv1505c
Rv1506c
Rv1507c
Rv1514c
Rv1515c
Rv1547
Rv1640c
Rv1754c
Rv1856c
Rv1870c
Rv1885c
Rv1908c
Rv2033c
Rv2102
Rv2140c
Rv2189c
Rv2289
Rv2452c
Rv2482c
Rv2632c
Rv2818c
Rv2822c
Rv2928
Rv2953
Rv3100c
Rv3252c
Rv3282
Rv3290c
Rv3318
Rv3378c
Rv3476c
Rv3528c
Rv3612c
Rv3613c
Rv3614c
Rv3615c
Rv3616c
Rv3632
Rv3741c
Rv3791
Rv3796
