# Supplementary material for: Modeling Phenotypic Metabolic Adaptations of Mycobacterium tuberculosis H37Rv under Hypoxia
Source: PLoS Comput Biol. 2012 Sep 13;8(9):e1002688. doi: 10.1371/journal.pcbi.1002688 (PMC3441462; doi:10.1371/journal.pcbi.1002688)
Supplement: Protocol S1 — MATLAB-formatted models of metabolism for M. tuberculosis HR37v and its Δ dosR deletion mutant. (ZIP) [file pcbi.1002688.s001.zip › dosRWT_induce_exp_gene_list.txt]

ORF00540
ORF00778
ORF00917
ORF01725
ORF03736.2
ORF04275
ORF04548
ORF05164
ORF05167
ORF05235
ORF05589
ORF06006
ORF08415
ORFD0022
ORFD0024
ORFD0070
ORFD0250
ORFD0310.1
Rv0015c
Rv0020c
Rv0046c
Rv0047c
Rv0079
Rv0080
Rv0081
Rv0082
Rv0083
Rv0085
Rv0135c
Rv0190
Rv0211
Rv0242c
Rv0243
Rv0279c
Rv0282
Rv0283
Rv0285
Rv0286
Rv0287
Rv0288
Rv0289
Rv0290
Rv0291
Rv0336
Rv0410c
Rv0411c
Rv0412c
Rv0467
Rv0486
Rv0509
Rv0511
Rv0512
Rv0513
Rv0515
Rv0526
Rv0527
Rv0528
Rv0558
Rv0569
Rv0570
Rv0572c
Rv0574c
Rv0578c
Rv0605
Rv0606
Rv0641
Rv0651
Rv0676c
Rv0677c
Rv0678
Rv0747
Rv0803
Rv0805
Rv0823c
Rv0824c
Rv0827c
Rv0829
Rv0832
Rv0833
Rv0834c
Rv0847
Rv0859
Rv0860
Rv0869c
Rv0872c
Rv0878c
Rv0885
Rv0886
Rv1013
Rv1015c
Rv1087
Rv1091
Rv1095
Rv1130
Rv1162
Rv1177
Rv1195
Rv1215c
Rv1216c
Rv1217c
Rv1218c
Rv1219c
Rv1227c
Rv1243c
Rv1245c
Rv1327c
Rv1344
Rv1379
Rv1380
Rv1381
Rv1410c
Rv1449c
Rv1452c
Rv1460
Rv1493
Rv1576c
Rv1577c
Rv1592c
Rv1593c
Rv1594
Rv1595
Rv1599
Rv1733c
Rv1736c
Rv1737c
Rv1738
Rv1779c
Rv1812c
Rv1813c
Rv1831
Rv1840c
Rv1842c
Rv1894c
Rv1996
Rv1997
Rv2003c
Rv2004c
Rv2005c
Rv2006
Rv2007c
Rv2015c
Rv2028c
Rv2029c
Rv2030c
Rv2031c
Rv2032
Rv2048c
Rv2052c
Rv2064
Rv2153c
Rv2157c
Rv2158c
Rv2160c
Rv2161c
Rv2162c
Rv2213
Rv2243
Rv2244
Rv2245
Rv2246
Rv2247
Rv2326c
Rv2365c
Rv2369c
Rv2455c
Rv2490c
Rv2524c
Rv2539c
Rv2540c
Rv2553c
Rv2554c
Rv2591
Rv2623
Rv2624c
Rv2625c
Rv2626c
Rv2627c
Rv2628
Rv2629
Rv2630
Rv2631
Rv2678c
Rv2719c
Rv2729c
Rv2737c
Rv2739c
Rv2749
Rv2782c
Rv2792c
Rv2830c
Rv2837c
Rv2838c
Rv2839c
Rv2846c
Rv2851c
Rv2852c
Rv2890c
Rv2931
Rv2932
Rv2933
Rv2934
Rv2935
Rv2936
Rv2940c
Rv2946c
Rv2977c
Rv2978c
Rv2979c
Rv3049c
Rv3074
Rv3085
Rv3088
Rv3093c
Rv3127
Rv3129
Rv3130c
Rv3131
Rv3132c
Rv3133c
Rv3134c
Rv3135
Rv3140
Rv3160c
Rv3202c
Rv3211
Rv3212
Rv3223c
Rv3285
Rv3297
Rv3306c
Rv3337
Rv3338
Rv3367
Rv3411c
Rv3419c
Rv3421c
Rv3422c
Rv3429
Rv3508
Rv3511
Rv3512
Rv3552
Rv3585
Rv3603c
Rv3607c
Rv3608c
Rv3610c
Rv3627c
Rv3660c
Rv3709c
Rv3801c
Rv3804c
Rv3841
Rv3842c
Rv3854c
Rv3855
Rv3873
Rv3879c
