# Supplementary material for: Modeling Phenotypic Metabolic Adaptations of Mycobacterium tuberculosis H37Rv under Hypoxia
Source: PLoS Comput Biol. 2012 Sep 13;8(9):e1002688. doi: 10.1371/journal.pcbi.1002688 (PMC3441462; doi:10.1371/journal.pcbi.1002688)
Supplement: Protocol S1 — MATLAB-formatted models of metabolism for M. tuberculosis HR37v and its Δ dosR deletion mutant. (ZIP) [file pcbi.1002688.s001.zip › dosRWT_induce_exp_ratio_list.txt]

2.0
2.4
2.1
2.0
2.4
1.8
2.4
2.7
9.8
2.0
1.8
2.4
2.4
2.7
2.8
1.8
1.8
2.3
1.9
1.8
3.2
4.2
22.2
7.8
4.9
3.1
2.1
1.8
2.6
1.8
2.0
1.9
2.3
1.9
2.4
2.1
2.3
2.2
1.9
1.9
1.9
2.4
2.9
2.2
1.8
2.7
2.4
2.0
2.6
1.9
2.5
2.2
2.0
2.3
2.2
2.1
2.6
1.9
9.0
5.5
3.0
2.0
2.0
1.8
1.8
1.9
1.8
4.7
5.5
3.9
2.1
1.9
2.1
2.8
1.8
2.3
2.8
1.9
1.8
2.0
2.4
2.6
2.5
1.8
2.2
2.4
4.1
3.2
1.8
2.0
1.8
2.5
2.0
2.7
2.3
2.2
3.0
2.1
4.4
10.6
4.3
2.4
2.4
2.0
2.7
1.8
2.0
1.9
1.9
2.1
1.8
1.8
2.0
1.9
1.9
2.3
2.2
2.6
1.9
2.8
3.0
2.1
4.1
3.7
8.5
22.8
3.6
3.6
11.4
1.8
1.9
1.9
1.8
7.9
4.3
2.3
4.2
7.3
2.2
25.9
1.8
6.0
13.3
27.3
27.9
15.1
2.0
2.7
1.9
2.1
1.9
1.9
1.8
1.9
2.5
1.8
4.1
3.8
3.8
3.9
4.7
2.2
2.0
1.8
2.5
2.1
2.7
2.5
2.5
1.9
1.8
2.4
18.8
3.9
3.0
24.5
12.4
13.6
7.6
6.5
3.4
1.9
1.8
1.9
2.2
2.0
1.8
2.0
2.0
2.6
2.1
2.3
2.0
2.1
2.2
2.1
2.0
3.4
3.7
3.1
2.2
2.0
1.8
2.3
3.1
1.9
2.5
1.9
2.4
1.8
2.0
2.1
2.1
17.4
2.7
25.5
34.1
5.7
9.1
22.2
2.3
2.1
2.1
2.3
2.2
3.0
1.8
2.0
1.8
1.8
2.9
2.5
1.9
2.0
2.0
1.8
2.4
1.9
2.5
1.8
2.4
2.0
2.0
2.0
1.8
2.6
2.0
1.8
1.8
2.3
2.3
1.8
5.2
2.4
2.8
2.0
2.1
2.3
