# Supplementary material for: Modeling Phenotypic Metabolic Adaptations of Mycobacterium tuberculosis H37Rv under Hypoxia
Source: PLoS Comput Biol. 2012 Sep 13;8(9):e1002688. doi: 10.1371/journal.pcbi.1002688 (PMC3441462; doi:10.1371/journal.pcbi.1002688)
Supplement: Protocol S1 — MATLAB-formatted models of metabolism for M. tuberculosis HR37v and its Δ dosR deletion mutant. (ZIP) [file pcbi.1002688.s001.zip › dosRWT_repress_exp_gene_list.txt]

ORF00615
ORF03215
ORF04123
ORF04687
ORF08410
Rv0032
Rv0033
Rv0035
Rv0042c
Rv0058
Rv0070c
Rv0111
Rv0114
Rv0140
Rv0144
Rv0164
Rv0166
Rv0169
Rv0170
Rv0171
Rv0172
Rv0173
Rv0174
Rv0178
Rv0208c
Rv0247c
Rv0302
Rv0303
Rv0402c
Rv0404
Rv0405
Rv0440
Rv0703
Rv0704
Rv0716
Rv0717
Rv0718
Rv0748
Rv0760c
Rv0920c
Rv1016c
Rv1079
Rv1101c
Rv1102c
Rv1114
Rv1182
Rv1183
Rv1184c
Rv1221
Rv1280c
Rv1281c
Rv1360
Rv1502
Rv1505c
Rv1506c
Rv1507c
Rv1514c
Rv1547
Rv1614
Rv1632c
Rv1640c
Rv1754c
Rv1870c
Rv1885c
Rv2009
Rv2082
Rv2085
Rv2102
Rv2189c
Rv2276
Rv2289
Rv2336
Rv2452c
Rv2482c
Rv2562
Rv2632c
Rv2756c
Rv2822c
Rv2953
Rv2959c
Rv3042c
Rv3100c
Rv3169
Rv3229c
Rv3233c
Rv3252c
Rv3282
Rv3312c
Rv3418c
Rv3476c
Rv3479
Rv3487c
Rv3493c
Rv3612c
Rv3613c
Rv3614c
Rv3632
Rv3741c
Rv3791
Rv3796
Rv3822
