# Supplementary material for: Modeling Phenotypic Metabolic Adaptations of Mycobacterium tuberculosis H37Rv under Hypoxia
Source: PLoS Comput Biol. 2012 Sep 13;8(9):e1002688. doi: 10.1371/journal.pcbi.1002688 (PMC3441462; doi:10.1371/journal.pcbi.1002688)
Supplement: Protocol S1 — MATLAB-formatted models of metabolism for M. tuberculosis HR37v and its Δ dosR deletion mutant. (ZIP) [file pcbi.1002688.s001.zip › dosRWT_repress_exp_ratio_list.txt]

1.9
2.1
1.8
2.0
2.2
1.8
2.6
1.9
2.0
2.0
2.1
2.0
1.8
1.8
2.2
1.8
2.7
1.9
3.0
2.3
2.7
2.6
2.6
2.3
1.9
2.0
1.9
1.8
1.8
3.2
2.3
4.1
1.9
1.8
1.8
1.8
2.0
2.1
2.5
2.0
1.9
2.0
1.8
1.8
2.2
2.4
2.0
2.6
1.8
2.0
2.1
1.8
1.9
1.8
2.2
1.8
1.8
2.3
1.8
1.9
2.2
2.1
2.8
2.2
1.9
2.1
1.9
1.9
1.8
1.8
1.9
2.0
1.9
1.8
1.9
2.1
1.8
1.8
1.9
2.2
1.8
2.2
1.8
1.8
1.8
2.6
2.9
1.9
2.1
1.8
1.9
2.1
2.0
2.6
1.9
2.2
1.8
2.3
1.9
2.3
2.0
