# Supplementary material for: Modeling Phenotypic Metabolic Adaptations of Mycobacterium tuberculosis H37Rv under Hypoxia
Source: PLoS Comput Biol. 2012 Sep 13;8(9):e1002688. doi: 10.1371/journal.pcbi.1002688 (PMC3441462; doi:10.1371/journal.pcbi.1002688)
Supplement: Protocol S1 — MATLAB-formatted models of metabolism for M. tuberculosis HR37v and its Δ dosR deletion mutant. (ZIP) [file pcbi.1002688.s001.zip › genelistdosRKO_relative061012.m]

% run \COBRAToolbox-1.3.3\initCobraToolbox first

%%%% init the system environment
clear all;
clc;
format short g;
solverOK = changeCobraSolver('glpk');
disp('calculating the results for dosR deletion mutant. the whole computation might take around 6 minutes');

time0 = cputime;
%%%% reading reference M.tb model 
dispstr = sprintf('%5.1f second: reading network model...',cputime-time0);
disp(dispstr)
modelTBCm = readCbModel('iNJ661m_SBML.xml');
bio_id = 1028;
uptake_id = [ 256:343 1035:2:1049 ]';
% block a set of reactions
modelTBCm.ub(findRxnIDs(modelTBCm,{'MMCD'})) = 0;
modelTBCm.lb(findRxnIDs(modelTBCm,{'MMCD'})) = 0;
modelTBCm.ub(findRxnIDs(modelTBCm,{'FBP'})) = 0;
%modelTBCm.lb(findRxnIDs(modelTBCm,{'FBP'})) = 0;
modelTBCm.ub(findRxnIDs(modelTBCm,{'QRr'})) = 0;
modelTBCm.lb(findRxnIDs(modelTBCm,{'QRr'})) = 0;

% define reactions of interest
studyrxnlist = {'PGI','PFK','FBP','FBA','TPI','GLYK','G3PD1','GAPD','PGK','PGM','ENO','PC','ACONT','ICDHy','FUM','MDH','ME1','EX_succ(e)','EX_co2(e)','EX_h(e)'};
study_rlist = findRxnIDs(modelTBCm,studyrxnlist)';


%%%% read gene expression data
% induce
dispstr = sprintf('%5.1f second: reading expression data...',cputime-time0);
disp(dispstr)
fid = fopen('dosRKO_induce_exp_gene_list.txt');
data_inducegenelist = textscan(fid,'%s');
fclose(fid);
fid = fopen('dosRKO_induce_exp_ratio_list.txt');
data_induceratiolist = textscan(fid,'%f');
fclose(fid);
% repress
fid = fopen('dosRKO_repress_exp_gene_list.txt');
data_repressgenelist = textscan(fid,'%s');
fclose(fid);
fid = fopen('dosRKO_repress_exp_ratio_list.txt');
data_repressratiolist = textscan(fid,'%f');
fclose(fid);
%%% compare network and expression data
% induce
expression_no = length(data_induceratiolist{1});
net_no = length(modelTBCm.genes);
expression_netgene = zeros(net_no,1);
expression_net_no = 0;
for i = 1:net_no
    j = 1;
    while j<=expression_no && expression_netgene(i)==0 
        if strcmp(modelTBCm.genes{i},data_inducegenelist{1}(j))==1
            expression_netgene(i)=j; % positive means induced gene
            expression_net_no = expression_net_no+1;
        end;
        j=j+1;
    end;
end;
expression_net_no;
% repress
expression_no = length(data_repressratiolist{1});
expression_net_no = 0;
for i = 1:net_no
    j = 1;
    while j<=expression_no && expression_netgene(i)==0 
        if strcmp(modelTBCm.genes{i},data_repressgenelist{1}(j))==1
            expression_netgene(i)=-j;% negative means repressed gene
            expression_net_no = expression_net_no+1;
        end;
        j=j+1;
    end;
end;
expression_net_no;
%initiate and read x - gene ratio values
x = ones(net_no,1);
for j = 1:net_no
    if expression_netgene(j)>0   
        x(j) = data_induceratiolist{1}(expression_netgene(j));  
    end;
    if expression_netgene(j)<0   
        x(j) = 1/data_repressratiolist{1}(-expression_netgene(j));  
    end;
end;

%%%% map gene to related reactions (Step II in paper)
dispstr = sprintf('%5.1f second: mapping gene expression data to reactions ...',cputime-time0);
disp(dispstr)
net_rlen = length(modelTBCm.rxns);
rxn_gene_multi = 999*ones(net_rlen,1);
for i = 1:net_no
    if x(i)~=1        
        for j = 1:net_rlen
            if modelTBCm.rxnGeneMat(j,i)==1
                rxn_gene_multi(j) = 0;
            end;                
        end;        
    end;
end;
rxn_gene_multi1 =  rxn_gene_multi;
% find common reactions
rxn_group = 0;
for i = 1:net_rlen
    if rxn_gene_multi(i)==0
        same_reg = 0;
        tmp_rxn_mat = modelTBCm.rxnGeneMat(i,:);
        for j = (i+1):net_rlen
            if min(tmp_rxn_mat == modelTBCm.rxnGeneMat(j,:))==1
                if same_reg==0
                    same_reg = 1;
                    rxn_group = rxn_group+1;
                    rxn_gene_multi(i) = rxn_group;
                end;
                rxn_gene_multi(j) = rxn_group;
            end;
        end;
    end;
end;
if rxn_gene_multi(findRxnIDs(modelTBCm,{'SUCD1i'}))~=999
    rxn_gene_multi(findRxnIDs(modelTBCm,{'SUCD1i'})) = -abs(rxn_gene_multi(findRxnIDs(modelTBCm,{'SUCD1i'})));
end;
up_rlist = find(rxn_gene_multi~=999);
multirxns = rxn_gene_multi(up_rlist);
% read gene regulation rules and compute reaction-specific values
up_rlen = length(up_rlist);
uprxn_ratio = zeros(up_rlen,1);
for i = 1:up_rlen
    sss = modelTBCm.rules{up_rlist(i)};
    tstring{i*2} = modelTBCm.grRules{up_rlist(i)};
    sslen = length(sss);
    numlist = zeros(sslen,1); %number list
    numpt = 0;
    oprlist = zeros(sslen,1); %operator list
    oprpt = 0;
    parlist = zeros(sslen,1); % parentheses list
    parpt = 0;
    mullist = ones(sslen,1); % multiple value list
    si = 1;
        while si <= sslen
            readc = sss(si);
            if readc == 'x'
                sit = si+1;
                while sss(sit)~=')'
                    sit = sit+1;
                end;    
                numpt = numpt+1;
                numlist(numpt) = eval(sss(si:sit));
                if numpt>1 && oprlist(numpt-1)==2 && numpt>parpt
                    numtmp = (numlist(numpt)*numlist(numpt-1));
                    numlist(numpt) = 0;
                    numpt = numpt-1;
                    numlist(numpt) = numtmp;
                    mullist(numpt) = mullist(numpt)+1;
                    oprlist(oprpt) = 0;
                    oprpt = oprpt-1;
                end;
                si = sit;
            end;
            if readc == '|'
                oprpt = oprpt+1;
                oprlist(oprpt) = 1;
            end;
            if readc == '&'
                oprpt = oprpt+1;
                oprlist(oprpt) = 2;
            end;
            if readc == '('
                if oprpt==numpt
                    parpt = numpt+1;
                    parlist(parpt) = parlist(parpt)+1;
                else
                    999999901
                end;
            end;
            if readc == ')'
                addnum = 1;
                while numpt > parpt && numpt~=1
                    %use geometric mean
                    numtmp = numlist(numpt)^(1/mullist(numpt))+numlist(numpt-1)^(1/mullist(numpt-1));
                    mullist(numpt) = 1;
                    mullist(numpt-1) = 1;
                    numlist(numpt) = 0;
                    numpt = numpt-1;
                    numlist(numpt) = numtmp;
                    oprlist(oprpt) = 0;
                    oprpt = oprpt-1;
                    addnum = addnum+1;
                end;
                %use geometric mean
                numlist(numpt) = numlist(numpt)^(1/mullist(numpt))/addnum;
                mullist(numpt) = 1;
                
                if parpt == 0
                    999999902
                else
                    parlist(parpt) = parlist(parpt)-1;
                end;
                while parpt~=0 && parlist(parpt)==0
                    parpt = parpt-1;
                end;
                if numpt>1 && oprlist(numpt-1)==2 && numpt>parpt
                    numtmp = (numlist(numpt)*numlist(numpt-1));
                    numlist(numpt) = 0;
                    numpt = numpt-1;
                    numlist(numpt) = numtmp;
                    mullist(numpt) = mullist(numpt)+1;
                    oprlist(oprpt) = 0;
                    oprpt = oprpt-1;
                end;
            end;
            if readc ~= ' '
                maxlen = max([ parpt numpt oprpt ]);
                [ parlist(1:maxlen) numlist(1:maxlen) oprlist(1:maxlen) ]';
            end;
            si = si+1;
        end;
        
        addnum = 1;
        for ki = numpt:-1:2
            if g1andg2 == 0
                %use product
                numtmp = numlist(numpt)+numlist(numpt-1);
            end;
            if g1andg2 == 1
                %use geometric mean
                numtmp = numlist(numpt)^(1/mullist(numpt))+numlist(numpt-1)^(1/mullist(numpt-1));
            end;
            mullist(numpt) = 1;
            mullist(numpt-1) = 1;
            numlist(numpt) = 0;
            numpt = numpt-1;
            numlist(numpt) = numtmp;
            oprlist(oprpt) = 0;
            oprpt = oprpt-1;
            addnum = addnum+1;
        end;
        %use geometric mean
        numlist(numpt) = numlist(numpt)^(1/mullist(numpt))/addnum;
        mullist(numpt) = 1;
        if oprpt~=0 || parpt~=0 || numpt ~=1
            999999903
        end;
        uprxn_ratio(i) = numlist(numpt);
        tstring{2*i} = sprintf('%s - %4.2f',tstring{2*i},numlist(numpt));
        %mullist'
end;


%%%% flux variability analysis
% adjust the upper bounds to 10000
BigNum = 10000;
net_rlen = length(modelTBCm.rxns);
net_mlen = length(modelTBCm.mets);
for i = 1:net_rlen
    if modelTBCm.lb(i)<= -BigNum/100
        modelTBCm.lb(i) = -BigNum;
    else
        modelTBCm.lb(i) = modelTBCm.lb(i)*100;
    end;
    if modelTBCm.ub(i) >= BigNum/100
        modelTBCm.ub(i) = BigNum;
    else
        modelTBCm.ub(i) = modelTBCm.ub(i)*100;
    end;
end;
solutionTB = optimizeCbModel(modelTBCm,'max'); 
refbiomass = solutionTB.f;

dispstr = sprintf('%5.1f second: reading reference fluxes ...',cputime-time0);
disp(dispstr)
read_ref_fluxes;

% incorporate overall flux for reactions with the same gene associations
if isempty(multirxns)==1
    multinum = 0;
else
    multinum = max(multirxns);
end;
v_ref = zeros((net_rlen+multinum),1);
v_ref(1:net_rlen) = v_ref1;

for i = 1:multinum
    net_mlen = net_mlen+1;
    net_rlen = net_rlen+1;
    modelTBCm.S(net_mlen,net_rlen) = -1;
    modelTBCm.rxns{net_rlen} = sprintf('addrxn%d',i);
    modelTBCm.lb(net_rlen) = 0;
    modelTBCm.ub(net_rlen) = BigNum;
    modelTBCm.c(net_rlen) = 0;
    modelTBCm.b(net_mlen) = 0;
    for j = 1:up_rlen
        if abs(multirxns(j))==i
            if multirxns(j)>0
                modelTBCm.S(net_mlen,up_rlist(j)) = 1;
                if modelTBCm.lb(up_rlist(j))<0
                    modelTBCm.lb(net_rlen) = -BigNum;
                end;
                v_ref(net_rlen) = v_ref(net_rlen)+v_ref(up_rlist(j));
            else
                modelTBCm.S(net_mlen,up_rlist(j)) = -1;
                modelTBCm.lb(net_rlen) = -BigNum;
                v_ref(net_rlen) = v_ref(net_rlen)-v_ref(up_rlist(j));
            end;
        end;
    end;
end;


% perform first round of FVA to analyze the structure
minFstr = zeros(net_rlen,1);
maxFstr = zeros(net_rlen,1);
status_str = zeros(net_rlen,2);
% only consider reference flux

for i = 1:net_rlen
    if mod(i,10) == 0
        %waitbar(i/net_rlen,h);
    end
    [aaa bbb] = ismember(i,up_rlist);
    if ((bbb~=0) && multirxns(bbb)==0) || (i>net_rlen-multinum)  
        % calculate minimal and maximal flux based on structure.
        alluptake = modelTBCm.lb(uptake_id); %all uptake
        for j = 1:length(uptake_id)
            %%%%% NOTE: Below is specific to iNJ661m
            if modelTBCm.lb(uptake_id(j))<-1e-6
                modelTBCm.lb(uptake_id(j)) = -BigNum; %all uptake     
            end;
        end;
        modelTBCm.c(bio_id) = 0;
        modelTBCm.c(i) = 1;
        solutionTB = optimizeCbModel(modelTBCm,'max');
        maxF2 = solutionTB.f;
        status_str(i,1) = solutionTB.stat;
        modelTBCm.c(i) = -1;
        solutionTB = optimizeCbModel(modelTBCm,'max');
        minF2 = -solutionTB.f;
        status_str(i,2) = solutionTB.stat;
        %[ i net_rlen  minF1 minF2 maxF1 maxF2 ]
        [i net_rlen minF2 maxF2 status_str(i,1) status_str(i,2) ];
        minFstr(i) = minF2;
        maxFstr(i) = maxF2;
        modelTBCm.c(i) = 0;
        modelTBCm.c(bio_id) = 1;
        modelTBCm.lb(uptake_id) = alluptake; %all uptake 
    end;
end;
%close(h);


minFall = v_ref;
maxFall = v_ref;

minFPCK = v_ref(769)+v_ref(816);
maxFPCK = v_ref(769)+v_ref(816);
minFFRDs = v_ref(418)+v_ref(421)+v_ref(1060);
maxFFRDs = v_ref(418)+v_ref(421)+v_ref(1060);
minFHEX = v_ref(526)+v_ref(822);
maxFHEX = v_ref(526)+v_ref(822);
minFPDH = v_ref(760)+v_ref(772);
maxFPDH = v_ref(760)+v_ref(772);
minFCS = v_ref(168)-v_ref(147);
maxFCS = v_ref(168)-v_ref(147);
minFSAL = v_ref(923)+v_ref(924);
maxFSAL = v_ref(923)+v_ref(924);
minFOXGDC = v_ref(738)+v_ref(739);
maxFOXGDC = v_ref(738)+v_ref(739);
minFPYK = v_ref(870)-v_ref(821);
maxFPYK = v_ref(870)-v_ref(821);

minATPall_ref = full(sum(abs(v_ref(1:net_rlen).*modelTBCm.S(181,:)'))/refbiomass/2);
maxATPall_ref = full(sum(abs(v_ref(1:net_rlen).*modelTBCm.S(181,:)'))/refbiomass/2);

% calculate the reference flux
minFup = minFall(up_rlist);
maxFup = maxFall(up_rlist);

upFref = (abs(minFup)+abs(maxFup))/2;
for i = 1:length(upFref)
    if upFref(i)<1e-7
        upFref(i) = 0;
    end;
end;
upFrefc = (abs(minFall(net_rlen-multinum+1:net_rlen))+abs(maxFall(net_rlen-multinum+1:net_rlen)))/2;
for i = 1:length(upFrefc)
    if upFrefc(i)<1e-7
        upFrefc(i) = 0;
    end;
end;
[up_rlist upFref/refbiomass  multirxns ; ((net_rlen-multinum+1):net_rlen)' upFrefc/refbiomass  (1001:(1000+multinum))'  ];


%%%% construct and solve hypoxia model
dispstr = sprintf('%5.1f second: constructing hypoxic model...',cputime-time0);
disp(dispstr)
KK = 10; % factor to eliminate very small fluxes
SmallF = 1e-6;  %might be changed
% count constraint numbers
addconstr_num = 0;
addvar_num = 0;
addint_num = 0;
multiindex = ones(multinum,1);
for i = 1:up_rlen
    if (multirxns(i)==0) 
        addvar_num = addvar_num+1;
        if modelTBCm.lb(up_rlist(i))>=0
            if uprxn_ratio(i)~=1
                addconstr_num = addconstr_num+1;
            end;
        else
            if uprxn_ratio(i)>1
                if minFstr(up_rlist(i))<-1e-8 && maxFstr(up_rlist(i))>1e-8 
                    addint_num = addint_num+1;
                    addconstr_num = addconstr_num+2;
                else
                    addconstr_num = addconstr_num+1;
                end;
            end;
            if uprxn_ratio(i)<1
                addconstr_num = addconstr_num+2;
            end;
        end;
    else
        if (multiindex(abs(multirxns(i)))==1)
            multiindex(abs(multirxns(i))) = 0;
            addvar_num = addvar_num+1;
            if modelTBCm.lb(net_rlen-multinum+abs(multirxns(i)))>=0
                if uprxn_ratio(i)~=1
                    addconstr_num = addconstr_num+1;
                end;
            else
                if uprxn_ratio(i)>1
                    if minFstr(net_rlen-multinum+abs(multirxns(i)))<-1e-8 && maxFstr(net_rlen-multinum+abs(multirxns(i)))>1e-8
                        addint_num = addint_num+1;
                        addconstr_num = addconstr_num+2;
                    else
                        addconstr_num = addconstr_num+1;
                    end;
                end;
                if uprxn_ratio(i)<1
                    addconstr_num = addconstr_num+2;
                end;
            end;
        end;
    end;
end;
addconstr_num; % number of added constraints
addvar_num;    % number of added slack variables
addint_num;    % number of added binary variables
% construct additional constraints
add_a = zeros(addconstr_num,net_rlen+addvar_num+addint_num);
add_b = zeros(addconstr_num,1);
add_i = 0;
add_var = 0;
add_int = 0;
multiindex = ones(multinum,1);
varlist = zeros(up_rlen,1);
intlist = zeros(up_rlen,1);
rxn_direct = zeros(up_rlen,1);
for i = 1:up_rlen
    if multirxns(i) == 0
        add_var = add_var+1;
        varlist(i) = add_var;
        if uprxn_ratio(i) < 1
            % repressed
            % vi/vbio <= R*vi_ref/vbio_ref   and xi=vi/vbio
            % so xi - (R*vi_ref/vbio_ref) <=0
            %    xi-Li*(vi_ref/vbio_ref) <= (R*vi_ref/vbio_ref)
            add_i = add_i+1;
            add_a(add_i,up_rlist(i))=1;% vi
            %add_var = add_var+1;
            add_a(add_i,net_rlen+add_var)=-upFref(i)/refbiomass*KK; %Li
            if upFref(i)/refbiomass<SmallF
                add_a(add_i,net_rlen+add_var)=-SmallF*KK; %Li
            end;
            add_b(add_i) = uprxn_ratio(i)*upFref(i)/refbiomass*KK;  % upper limit
            rxn_direct(i) = 1;
            if modelTBCm.lb(up_rlist(i))<0
                % vi/vbio >= -R*vi_ref/vbio_ref
                % so -xi - (R*vi_ref/vbio_ref) <=0
                %    -vi-Li*(vi_ref/vbio_ref) <= (R*vi_ref/vbio_ref)
                add_i = add_i+1;
                add_a(add_i,up_rlist(i))=-1;
                add_a(add_i,net_rlen+add_var)=-upFref(i)/refbiomass*KK;
                if upFref(i)/refbiomass<SmallF
                    add_a(add_i,net_rlen+add_var)=-SmallF*KK; %Li
                end;
                add_b(add_i) = uprxn_ratio(i)*upFref(i)/refbiomass*KK;  %lower limit
                rxn_direct(i) = 2;
            end;
        else
            if uprxn_ratio(i)>1 && minFstr(up_rlist(i))>=-1e-8
                % induced
                % vi/vbio >= R*vi_ref/vbio_ref
                % so -xi+(R*vi_ref/vbio_ref) <=0
                %    -xi-Li*(vi_ref/vbio_ref) <= -(R*vi_ref/vbio_ref)
                add_i = add_i+1;
                add_a(add_i,up_rlist(i))=-1;
                %add_var = add_var+1;
                add_a(add_i,net_rlen+add_var)=-upFref(i)/refbiomass*KK;
                add_b(add_i) = -uprxn_ratio(i)*upFref(i)/refbiomass*KK; %lower limit for positive flux
                if upFref(i)/refbiomass<SmallF
                    add_a(add_i,net_rlen+add_var)=-SmallF*KK;
                    add_b(add_i) = -uprxn_ratio(i)*SmallF*KK; %lower limit for positive flux
                end;
                rxn_direct(i) = 1;
            end;
            if uprxn_ratio(i)>1 && minFstr(up_rlist(i))<-1e-8 && maxFstr(up_rlist(i))<=1e-8
                % induced
                % vi/vbio <= -R*vi_ref/vbio_ref
                % so xi+(R*vi_ref/vbio_ref) <=0
                %    xi-Li*(vi_ref/vbio_ref) <= -(R*vi_ref/vbio_ref)
                add_i = add_i+1;
                add_a(add_i,up_rlist(i))=1;
                %add_var = add_var+1;
                add_a(add_i,net_rlen+add_var)=-upFref(i)/refbiomass*KK;
                add_b(add_i) = -uprxn_ratio(i)*upFref(i)/refbiomass*KK; %lower limit for positive flux
                if upFref(i)/refbiomass<SmallF
                    add_a(add_i,net_rlen+add_var)=-SmallF*KK;
                    add_b(add_i) = -uprxn_ratio(i)*SmallF*KK; %lower limit for positive flux
                end;
                rxn_direct(i) = -1;
            end;
            
            if uprxn_ratio(i)>1 && minFstr(up_rlist(i))<-1e-8 && maxFstr(up_rlist(i))>1e-8
                % induced
                % vi/vbio >= R*vi_ref/vbio_ref
                % so -xi+(R*vi_ref/vbio_ref) <=0
                %    -xi-Li*(vi_ref/vbio_ref) <= -(R*vi_ref/vbio_ref)
                % with integer variables
                %    -xi-Li*(vi_ref/vbio_ref)-yi*U <= -(R*vi_ref/vbio_ref)
                add_i = add_i+1;
                add_a(add_i,up_rlist(i))=-1;
                %add_var = add_var+1;
                add_a(add_i,net_rlen+add_var)=-upFref(i)/refbiomass*KK;
                add_b(add_i) = -uprxn_ratio(i)*upFref(i)/refbiomass*KK; %lower limit for positive flux
                if upFref(i)/refbiomass<SmallF
                    add_a(add_i,net_rlen+add_var)=-SmallF*KK;
                    add_b(add_i) = -uprxn_ratio(i)*SmallF*KK; %lower limit for positive flux
                end;
                add_int = add_int+1;
                intlist(i) = add_int;
                %intlist(add_int) = up_rlist(i);
                add_a(add_i,net_rlen+addvar_num+add_int) = -BigNum;
                % vi/vbio <= -R*vi_ref/vbio_ref
                % so xi+(R*vi_ref/vbio_ref) <=0
                %    xi+(R*vi_ref/vbio_ref)-Li*(vi_ref/vbio_ref) <=0
                %    xi+(R*vi_ref/vbio_ref)-Li*(vi_ref/vbio_ref) -(1-yi)*U <=0
                add_i = add_i+1;
                add_a(add_i,up_rlist(i))=1; %xi
                add_a(add_i,net_rlen+add_var)=-upFref(i)/refbiomass*KK; %Li
                add_b(add_i) = -uprxn_ratio(i)*upFref(i)/refbiomass*KK+BigNum; %U & upper limit for negative flux
                if upFref(i)/refbiomass<SmallF
                    add_a(add_i,net_rlen+add_var)=-SmallF*KK; %Li
                    add_b(add_i) = -uprxn_ratio(i)*SmallF*KK+BigNum; %upper limit for negative flux
                end;
                add_a(add_i,net_rlen+addvar_num+add_int) = BigNum; %yi
                rxn_direct(i) = 2;
            end;
        end;
    else
        if (multiindex(abs(multirxns(i)))==1)
            multiindex(abs(multirxns(i))) = 0;
            add_var = add_var+1;
            varlist(i) = add_var;
            if uprxn_ratio(i) < 1
                % repressed
                % vi/vbio <= R*vi_ref/vbio_ref
                % so xi - (R*vi_ref/vbio_ref) <=0
                %    xi - (R*vi_ref/vbio_ref)-Li*(vi_ref/vbio_ref) <=0
                add_i = add_i+1;
                add_a(add_i,net_rlen-multinum+abs(multirxns(i)))=1; %rxn flux
                %add_var = add_var+1;
                add_a(add_i,net_rlen+add_var)=-upFrefc(abs(multirxns(i)))/refbiomass*KK; % slack variable
                if upFrefc(abs(multirxns(i)))/refbiomass<SmallF
                    add_a(add_i,net_rlen+add_var)=-SmallF*KK; %Li
                end;
                add_b(add_i) = uprxn_ratio(i)*upFrefc(abs(multirxns(i)))/refbiomass*KK;  %upper limit
                rxn_direct(i) = 1;
                if modelTBCm.lb(net_rlen-multinum+abs(multirxns(i)))<0
                    % vi/vbio >= -R*vi_ref/vbio_ref
                    % so -xi - (R*vi_ref/vbio_ref) <=0
                    %    -xi - (R*vi_ref/vbio_ref)-Li*(vi_ref/vbio_ref) <=0
                    add_i = add_i+1;
                    add_a(add_i,net_rlen-multinum+abs(multirxns(i)))=-1;
                    add_a(add_i,net_rlen+add_var)=-upFrefc(abs(multirxns(i)))/refbiomass*KK;
                    if upFrefc(abs(multirxns(i)))/refbiomass<SmallF
                        add_a(add_i,net_rlen+add_var)=-SmallF*KK; %Li
                    end;
                    add_b(add_i) = uprxn_ratio(i)*upFrefc(abs(multirxns(i)))/refbiomass*KK;  %lower limit
                    rxn_direct(i) = 2;
                end;
            else
                if uprxn_ratio(i)>1 && minFstr(net_rlen-multinum+abs(multirxns(i)))>=-1e-8
                    % induced
                    % vi/vbio >= R*vi_ref/vbio_ref
                    % so -xi+(R*vi_ref/vbio_ref) <=0
                    %    -xi+(R*vi_ref/vbio_ref)-Li*(vi_ref/vbio_ref) <=0
                    add_i = add_i+1;
                    add_a(add_i,net_rlen-multinum+abs(multirxns(i)))=-1; %vi
                    %add_var = add_var+1;
                    add_a(add_i,net_rlen+add_var)=-upFrefc(abs(multirxns(i)))/refbiomass*KK; %Li
                    add_b(add_i) = -uprxn_ratio(i)*upFrefc(abs(multirxns(i)))/refbiomass*KK; %lower limit for positive flux
                    if upFrefc(abs(multirxns(i)))/refbiomass<SmallF
                        add_a(add_i,net_rlen+add_var)=-SmallF*KK; %Li
                        add_b(add_i) = -uprxn_ratio(i)*SmallF*KK; %lower limit for positive flux
                    end;
                    rxn_direct(i) = 1;
                end;
                
                if uprxn_ratio(i)>1 && minFstr(net_rlen-multinum+abs(multirxns(i)))<-1e-8 && maxFstr(net_rlen-multinum+abs(multirxns(i)))<=1e-8
                    % induced
                    % vi/vbio <= -R*vi_ref/vbio_ref
                    % so xi+(R*vi_ref/vbio_ref) <=0
                    %    xi+(R*vi_ref/vbio_ref)-Li*(vi_ref/vbio_ref) <=0
                    add_i = add_i+1;
                    add_a(add_i,net_rlen-multinum+abs(multirxns(i)))=1; %vi
                    %add_var = add_var+1;
                    add_a(add_i,net_rlen+add_var)=-upFrefc(abs(multirxns(i)))/refbiomass*KK; %Li
                    add_b(add_i) = -uprxn_ratio(i)*upFrefc(abs(multirxns(i)))/refbiomass*KK; %lower limit for positive flux
                    if upFrefc(abs(multirxns(i)))/refbiomass<SmallF
                        add_a(add_i,net_rlen+add_var)=-SmallF*KK; %Li
                        add_b(add_i) = -uprxn_ratio(i)*SmallF*KK; %lower limit for positive flux
                    end;
                    rxn_direct(i) = -1;
                end;
                
                if uprxn_ratio(i)>1 && minFstr(net_rlen-multinum+abs(multirxns(i)))<-1e-8 && maxFstr(net_rlen-multinum+abs(multirxns(i)))>1e-8
                    % induced
                    % vi/vbio >= R*vi_ref/vbio_ref
                    % so -xi+(R*vi_ref/vbio_ref) <=0
                    %    -xi+(R*vi_ref/vbio_ref)-Li*(vi_ref/vbio_ref) <=0
                    add_i = add_i+1;
                    add_a(add_i,net_rlen-multinum+abs(multirxns(i)))=-1; %vi
                    %add_var = add_var+1;
                    add_a(add_i,net_rlen+add_var)=-upFrefc(abs(multirxns(i)))/refbiomass*KK; %Li
                    add_b(add_i) = -uprxn_ratio(i)*upFrefc(abs(multirxns(i)))/refbiomass*KK; %lower limit for positive flux
                    if upFrefc(abs(multirxns(i)))/refbiomass<SmallF
                        add_a(add_i,net_rlen+add_var)=-SmallF*KK; %Li
                        add_b(add_i) = -uprxn_ratio(i)*SmallF*KK; %lower limit for positive flux
                    end;
                    %    -xi+(R*vi_ref/vbio_ref)-Li*(vi_ref/vbio_ref)-yi*U <=0
                    add_int = add_int+1;
                    intlist(i) = add_int;
                    add_a(add_i,net_rlen+addvar_num+add_int) = -BigNum;
                    % vi/vbio <= -R*vi_ref/vbio_ref
                    % so xi+(R*vi_ref/vbio_ref) <=0
                    %    xi+(R*vi_ref/vbio_ref)-Li*(vi_ref/vbio_ref) <=0
                    %    xi+(R*vi_ref/vbio_ref)-Li*(vi_ref/vbio_ref) -(1-yi)*U <=0
                    add_i = add_i+1;
                    add_a(add_i,net_rlen-multinum+abs(multirxns(i)))=1;
                    add_a(add_i,net_rlen+add_var)=-upFrefc(abs(multirxns(i)))/refbiomass*KK;
                    add_b(add_i) = -uprxn_ratio(i)*upFrefc(abs(multirxns(i)))/refbiomass*KK+BigNum; %upper limit for negative flux
                    if upFrefc(abs(multirxns(i)))/refbiomass<SmallF
                        add_a(add_i,net_rlen+add_var)=-SmallF*KK;
                        add_b(add_i) = -uprxn_ratio(i)*SmallF*KK+BigNum; %upper limit for negative flux
                    end;
                    add_a(add_i,net_rlen+addvar_num+add_int) = BigNum;
                    rxn_direct(i) = 2;
                end;
            end;
        end;
    end;
end;
% add some biomass components
increasebio_num = 0;
for i = 1:net_mlen
    if (modelTBCm.S(i,bio_id)<0) && (modelTBCm.S(i,bio_id)>-10)
        increasebio_num = increasebio_num+2;
    end;
end;
add_mdissipate = zeros(net_mlen,increasebio_num+1);
add_mdissipate_ub = zeros(increasebio_num+1,1);
c_newbio = zeros(increasebio_num,1);
increasebio_num = 0;
for i = 1:net_mlen
    if (modelTBCm.S(i,bio_id)<0) && (modelTBCm.S(i,bio_id)>-10)
        % S*v-c*(1+a1-a2)*vbio = 0
        % (S*v-c*vbio)-c1*vbio+c2*vbio = 0
        increasebio_num = increasebio_num+1;
        c_newbio(increasebio_num) = (-1/modelTBCm.S(i,bio_id));
        add_mdissipate(i,increasebio_num) = -KK;
        add_mdissipate_ub(increasebio_num) = BigNum;
        increasebio_num = increasebio_num+1;
        c_newbio(increasebio_num) = (-1/modelTBCm.S(i,bio_id));
        add_mdissipate(i,increasebio_num) = KK;
        add_mdissipate_ub(increasebio_num) = -modelTBCm.S(i,bio_id)-5e-7;
    end;
end;
add_mdissipate_ub(increasebio_num+1) = BigNum;
% construct biomass constraint
add_abio = zeros(increasebio_num,increasebio_num+1);
add_bbio = zeros(increasebio_num,1);
for i = 1:increasebio_num
    %    a = (dc)/c <= am
    % so    dc/c-am <= 0
    add_abio(i,i) = c_newbio(i); % a or dc
    add_abio(i,increasebio_num+1) = -1; % am
end;

% flux constraints - increase uptakes
% uptake reactions uptake_id are defined at the beginning
exchconstr = 0;
for j = 1:net_rlen
    % specific to iNJ661m
    if ismember(j,uptake_id)~=0 && (modelTBCm.lb(j)<0) && (modelTBCm.lb(j)~=(-BigNum)) %&& j~=317 % no oxygen allowed
        exchconstr = exchconstr+1;
    end;
end;
add_flux = zeros(exchconstr*2+1,net_rlen+addvar_num+addint_num+exchconstr+1+increasebio_num);
add_bflux = zeros(exchconstr*2+1,1);
exchconstr_num = exchconstr;
exchconstr = 0;
for j = 1:net_rlen
    % possible added flux - specific for iNJ661m
    if ismember(j,uptake_id)~=0 && (modelTBCm.lb(j)<0) && (modelTBCm.lb(j)~=(-BigNum)) %&& j~=317 % no oxygen allowed
        exchconstr = exchconstr+1;
        %    x <= ub*(1+du)
        % so x-ub*du <= ub
        % for iNJ661m
        %        x >= lb*(1+du)
        % -x+lb*du <= -lb
        add_flux(exchconstr*2-1,j) = -1; %x
        add_flux(exchconstr*2-1,net_rlen+addvar_num+addint_num+exchconstr) = modelTBCm.lb(j)/refbiomass*KK; %dU
        add_bflux(2*exchconstr-1) = -modelTBCm.lb(j)/refbiomass*KK; %
         % du <= dumax
        % so du-dumax <= 0
        add_flux(2*exchconstr,net_rlen+addvar_num+addint_num+exchconstr) = 1;
        add_flux(2*exchconstr,net_rlen+addvar_num+addint_num+exchconstr_num+1) = -1;
        add_bflux(2*exchconstr) = 0;
    end;
end;
add_flux(exchconstr*2+1,bio_id) = 1;  % growth rate=1
add_bflux(exchconstr*2+1) = KK;      % growth rate=1
milp_a = [ modelTBCm.S zeros(net_mlen,addvar_num+addint_num+exchconstr+1) add_mdissipate; 
           add_a zeros(addconstr_num,exchconstr+1+increasebio_num+1);
           zeros(increasebio_num,net_rlen+addvar_num+addint_num+exchconstr+1)  add_abio;
           add_flux zeros(exchconstr*2+1,1) ];
milp_b = [ modelTBCm.b; add_b; add_bbio; add_bflux ];
milp_c = [ zeros(net_rlen,1); ones(addvar_num,1); zeros(addint_num,1); zeros(exchconstr,1); 0; zeros(increasebio_num,1); 0 ];

milp_lb = [ modelTBCm.lb; zeros(addvar_num+addint_num+exchconstr+1+increasebio_num+1,1) ];
milp_ub = [ modelTBCm.ub; BigNum*ones(addvar_num+addint_num+exchconstr+1,1); add_mdissipate_ub ];

for i = 1:net_rlen
    % deal with uptake rates, specific to iNJ661m
    if (milp_ub(i)~=0)&&(milp_ub(i)~=(BigNum))
        if ismember(i,uptake_id)==0 %|| i==317 %oxygen not increase
            milp_ub(i) = milp_ub(i)/refbiomass*KK;
        else
            milp_ub(i) = BigNum;
        end;
    end;
    if (milp_lb(i)~=0)&&(milp_lb(i)~=(-BigNum))
        if ismember(i,uptake_id)==0 %|| i==317 %oxygen not increase
            milp_lb(i) = milp_lb(i)/refbiomass*KK;
        else
            milp_lb(i) = -BigNum;
        end;
    end;
end;
milp_ctype = 'S';
for i = 1:net_mlen+addconstr_num+increasebio_num+exchconstr*2+1
    if i <= net_mlen
        milp_ctype(i) = 'S';
    else
        milp_ctype(i) = 'U';
    end;
    if i==net_mlen+addconstr_num+increasebio_num+exchconstr*2+1
        milp_ctype(i) = 'S';
    end;
end;
milp_vartype = 'C';
for i = 1:net_rlen+addvar_num+addint_num
    if i <= net_rlen+addvar_num
        milp_vartype(i) = 'C';
    else
        milp_vartype(i) = 'B';
    end;
end;
for i = net_rlen+addvar_num+addint_num+1:net_rlen+addvar_num+addint_num+exchconstr+1+increasebio_num+1
    milp_vartype(i) = 'C';
end;


%%%%% solve the model
% initial solution
dispstr = sprintf('%5.1f second: minimizing the sum of slack variables...',cputime-time0);
disp(dispstr)
milp_sense = 1;
params.tolbnd = 1e-8;
[xopt, fmin, bnb_status, extra] = lpxf_b1 (milp_c, milp_a, milp_b, milp_lb, milp_ub, milp_ctype, milp_vartype, milp_sense,params);
sumLfirst = xopt(net_rlen+1:net_rlen+addvar_num)'*milp_c(net_rlen+1:net_rlen+addvar_num);


% calculate changed biomass composition
dispstr = sprintf('%5.1f second: minimizing the modification of biomass function...',cputime-time0);
disp(dispstr)
bio_finish = 0;
bio_determined = zeros(increasebio_num,1);
for i = 1:2:increasebio_num-1
    % increased biomass 
    %    a = (dc)/c <= am
    % so    dc/c-am <= 0
    add_abio(i,i) = c_newbio(i); % a or dc
    add_abio(i,increasebio_num+1) = -1; % am
    % decreased biomass 
    %    a = (dc)/c <= am
    % so    dc/c-am <= 0
    add_abio(i+1,i+1) = c_newbio(i+1); % a or dc
    add_abio(i+1,increasebio_num+1) = -1; % am
end;
milp_a = [  modelTBCm.S zeros(net_mlen,addvar_num+addint_num+exchconstr+1) add_mdissipate;
            add_a zeros(addconstr_num,exchconstr+1+increasebio_num+1);
            zeros(increasebio_num,net_rlen+addvar_num+addint_num+exchconstr+1)  add_abio;
            add_flux zeros(exchconstr*2+1,1);
            zeros(1,net_rlen) ones(1,addvar_num) zeros(1,addint_num) zeros(1,exchconstr) 0 zeros(1,increasebio_num) 0 ];
milp_b = [ modelTBCm.b; add_b; add_bbio; add_bflux; sumLfirst ];
milp_ctype(net_mlen+addconstr_num+increasebio_num+exchconstr*2+2) = 'U';
milp_c = [ zeros(net_rlen,1); zeros(addvar_num,1); zeros(addint_num,1); zeros(exchconstr,1); 0; zeros(increasebio_num,1); 1 ];
while bio_finish == 0
    % solve MILP
    milp_sense = 1;
    params.tolbnd = 1e-8;
    if addint_num==0
            [xopt, fmin, bnb_status, extra] = lpxf_b1 (milp_c, milp_a, milp_b, milp_lb, milp_ub, milp_ctype, milp_vartype, milp_sense,params);
            bnb_time = 0;
            bnb_lambda = extra.lambda;
    else
            [xopt, fmin, bnb_status, bnb_time, bnb_lambda] = bnb_milp013112 (milp_c, milp_a, milp_b, milp_lb, milp_ub, milp_ctype, milp_vartype, milp_sense,params,-1);
            reran_times = 0;
            while bnb_status~=5 && reran_times<=20
                milp_b(end) = milp_b(end)*1.0000001;
                [xopt, fmin, bnb_status, bnb_time, bnb_lambda] = bnb_milp013112 (milp_c, milp_a, milp_b, milp_lb, milp_ub, milp_ctype, milp_vartype, milp_sense,params,-1);
                reran_times = reran_times+1;
            end;
            if reran_times>20
                fprintf(1,'something wrong when calculating biomass composition!\n');
            end;
    end;
    sumL = xopt(net_rlen+1:net_rlen+addvar_num)'*ones(addvar_num,1);
    maxBio = xopt(net_rlen+addvar_num+addint_num+exchconstr+1+increasebio_num+1);
    format long g
    %disp([ 0 fmin sumL maxBio bnb_status])
        
    if maxBio > 1e-6
        fmin1 = zeros(increasebio_num,1);
        for i = 1:increasebio_num
            if bio_determined(i)==0 && abs(bnb_lambda(net_mlen+addconstr_num+i))>1e-6
                sparse(milp_a(1:net_mlen,net_rlen+addvar_num+addint_num+exchconstr+1+i));
                bio_determined(i) = 2;
                if mod(i,2)==0
                    if xopt(net_rlen+addvar_num+addint_num+exchconstr+1+i-1)>1e-7
                        bio_determined(i) = 0;
                    end;
                else
                    if xopt(net_rlen+addvar_num+addint_num+exchconstr+1+i+1)>1e-7
                        bio_determined(i) = 0;
                    end;
                end;
            end;
            if bio_determined(i)==2
                fmin1(i) = abs(bnb_lambda(net_mlen+addconstr_num+i));
                if fmin1(i)>1e-6
                    if mod(i,2)==0
                        bio_determined(i-1) = 4;
                    else
                        bio_determined(i+1) = 4;
                    end;
                else
                    bio_determined(i) = 3;
                end;
            end;
        end;
        if isempty(find(bio_determined==2))==1
            fmin1rec = -1;
            irec = 0;
            for i = 1:increasebio_num
                if bio_determined(i)==3
                    if fmin1(i) > fmin1rec;
                        irec = i;
                        fmin1rec = fmin1(i);
                    end;
                end;
            end;
            bio_determined(irec) = 1;
            add_abio(irec,irec) = 0;
            milp_a = [  modelTBCm.S zeros(net_mlen,addvar_num+addint_num+exchconstr+1) add_mdissipate;
                add_a zeros(addconstr_num,exchconstr+1+increasebio_num+1);
                zeros(increasebio_num,net_rlen+addvar_num+addint_num+exchconstr+1)  add_abio;
                add_flux zeros(exchconstr*2+1,1);
                zeros(1,net_rlen) ones(1,addvar_num) zeros(1,addint_num) zeros(1,exchconstr) 0 zeros(1,increasebio_num) 0 ];
            milp_lb(net_rlen+addvar_num+addint_num+exchconstr+1+irec) = xopt(net_rlen+addvar_num+addint_num+exchconstr+1+increasebio_num+1)/c_newbio(irec);
            milp_ub(net_rlen+addvar_num+addint_num+exchconstr+1+irec) = xopt(net_rlen+addvar_num+addint_num+exchconstr+1+increasebio_num+1)/c_newbio(irec);
            if mod(irec,2)==0
                milp_lb(net_rlen+addvar_num+addint_num+exchconstr+1+irec-1) = 0;
                milp_ub(net_rlen+addvar_num+addint_num+exchconstr+1+irec-1) = 0;
                bio_determined(irec-1) = 1;
            else
                milp_lb(net_rlen+addvar_num+addint_num+exchconstr+1+irec+1) = 0;
                milp_ub(net_rlen+addvar_num+addint_num+exchconstr+1+irec+1) = 0;
                bio_determined(irec+1) = 1;
            end;
            bio_determined(find(bio_determined==3))=0;
        else
            for i = 1:increasebio_num
                if bio_determined(i)==2
                    bio_determined(i)=1;
                    add_abio(i,i) = 0;
                    milp_a = [  modelTBCm.S zeros(net_mlen,addvar_num+addint_num+exchconstr+1) add_mdissipate;
                        add_a zeros(addconstr_num,exchconstr+1+increasebio_num+1);
                        zeros(increasebio_num,net_rlen+addvar_num+addint_num+exchconstr+1)  add_abio;
                        add_flux zeros(exchconstr*2+1,1);
                        zeros(1,net_rlen) ones(1,addvar_num) zeros(1,addint_num) zeros(1,exchconstr) 0 zeros(1,increasebio_num) 0 ];
                    milp_lb(net_rlen+addvar_num+addint_num+exchconstr+1+i) = maxBio/c_newbio(i);
                    milp_ub(net_rlen+addvar_num+addint_num+exchconstr+1+i) = maxBio/c_newbio(i);
                end;
                if bio_determined(i)==4
                    bio_determined(i)=1;
                    milp_lb(net_rlen+addvar_num+addint_num+exchconstr+1+i) = 0;
                    milp_ub(net_rlen+addvar_num+addint_num+exchconstr+1+i) = 0;
                end;
                if bio_determined(i)==3
                    bio_determined(i)=0;
                end;
            end;
        end;
        if min(bio_determined)~=0
            bio_finish = 1;
        end;
    else
        bio_finish = 1;
    end;
    
    format short g;
    sum(bio_determined);
    
    %disp(bio_determined');
    
end; %%% while
sumLbio = xopt(net_rlen+1:net_rlen+addvar_num)'*ones(addvar_num,1);

% calculate nutrient uptakes
dispstr = sprintf('%5.1f second: minimizing the modification of nutrient uptakes...',cputime-time0);
disp(dispstr)
milp_lb(net_rlen+addvar_num+addint_num+exchconstr+1+1:net_rlen+addvar_num+addint_num+exchconstr+1+increasebio_num+1) = xopt(net_rlen+addvar_num+addint_num+exchconstr+1+1:net_rlen+addvar_num+addint_num+exchconstr+1+increasebio_num+1);
milp_ub(net_rlen+addvar_num+addint_num+exchconstr+1+1:net_rlen+addvar_num+addint_num+exchconstr+1+increasebio_num+1) = xopt(net_rlen+addvar_num+addint_num+exchconstr+1+1:net_rlen+addvar_num+addint_num+exchconstr+1+increasebio_num+1);
milp_c = [ zeros(net_rlen,1); zeros(addvar_num,1); zeros(addint_num,1); zeros(exchconstr,1); 1; zeros(increasebio_num,1); 0 ];
uptake_finish = 0;
uptake_determined = zeros(exchconstr,1);
while uptake_finish == 0
    % use branch and bound method to solve MILP
    milp_sense = 1;
    params.tolbnd = 1e-8;
    if addint_num==0
            [xopt, fmin, bnb_status, extra] = lpxf_b1 (milp_c, milp_a, milp_b, milp_lb, milp_ub, milp_ctype, milp_vartype, milp_sense,params);
            bnb_time = 0;
    else
            [xopt, fmin, bnb_status, bnb_time, bnb_lambda] = bnb_milp013112 (milp_c, milp_a, milp_b, milp_lb, milp_ub, milp_ctype, milp_vartype, milp_sense,params,-1);
            reran_times = 0;
            while bnb_status~=5 && reran_times<=20
                milp_b(end) = milp_b(end)*1.00001;
                [xopt, fmin, bnb_status, bnb_time, bnb_lambda] = bnb_milp013112 (milp_c, milp_a, milp_b, milp_lb, milp_ub, milp_ctype, milp_vartype, milp_sense,params,-1);
                reran_times = reran_times+1;
            end;
            if reran_times>20
                fprintf(1,'something wrong when calculating uptakes!\n');
            end;
    end;
    sumL = xopt(net_rlen+1:net_rlen+addvar_num)'*ones(addvar_num,1);
    maxUptake = xopt(net_rlen+addvar_num+addint_num+exchconstr+1);
    format long g;
    [ 0 fmin sumL maxUptake bnb_status ];
    format short g;
    if maxUptake > 1e-6
        fmin1 = zeros(exchconstr,1);
        for i = 1:exchconstr
            if uptake_determined(i)==0 && abs(bnb_lambda(net_mlen+addconstr_num+increasebio_num+2*i))>1e-6
                uptake_determined(i) = 2;
            end;
            if uptake_determined(i)==2
                fmin1(i) = abs(bnb_lambda(net_mlen+addconstr_num+increasebio_num+2*i));
                if fmin1(i) >1e-6
                else
                    uptake_determined(i) = 3;
                end;
            end;
        end;
        if isempty(find(uptake_determined==2))==1
            fmin1rec = -1;
            irec = 0;
            for i = 1:exchconstr
                if uptake_determined(i)==3
                    if fmin1(i) > fmin1rec;
                        irec = i;
                        fmin1rec = fmin1(i);
                    end;
                end;
            end;
            uptake_determined(irec) = 1;
            add_flux(2*irec,net_rlen+addvar_num+addint_num+irec) = 0;
            milp_a = [  modelTBCm.S zeros(net_mlen,addvar_num+addint_num+exchconstr+1) add_mdissipate;
                add_a zeros(addconstr_num,exchconstr+1+increasebio_num+1);
                zeros(increasebio_num,net_rlen+addvar_num+addint_num+exchconstr+1)  add_abio;
                add_flux zeros(exchconstr*2+1,1);
                zeros(1,net_rlen) ones(1,addvar_num) zeros(1,addint_num) zeros(1,exchconstr) 0 zeros(1,increasebio_num) 0 ];
            milp_lb(net_rlen+addvar_num+addint_num+irec) = maxUptake;
            milp_ub(net_rlen+addvar_num+addint_num+irec) = maxUptake;
            uptake_determined(find(uptake_determined==3))=0;
        else
            for i = 1:exchconstr
                if uptake_determined(i)==2
                    uptake_determined(i)=1;
                    add_flux(2*i,net_rlen+addvar_num+addint_num+i) = 0;
                    milp_a = [  modelTBCm.S zeros(net_mlen,addvar_num+addint_num+exchconstr+1) add_mdissipate;
                        add_a zeros(addconstr_num,exchconstr+1+increasebio_num+1);
                        zeros(increasebio_num,net_rlen+addvar_num+addint_num+exchconstr+1)  add_abio;
                        add_flux zeros(exchconstr*2+1,1);
                        zeros(1,net_rlen) ones(1,addvar_num) zeros(1,addint_num) zeros(1,exchconstr) 0 zeros(1,increasebio_num) 0 ];
                    milp_lb(net_rlen+addvar_num+addint_num+i) = maxUptake;
                    milp_ub(net_rlen+addvar_num+addint_num+i) = maxUptake;
                end;
                if uptake_determined(i)==3
                    uptake_determined(i)=0;
                end;
            end;
        end;
        if min(uptake_determined)~=0
            uptake_finish = 1;
        end;
    else
        uptake_finish = 1;
    end;
    
    format short g;
    sum(uptake_determined);
    
end; %%% while
sumLuptake = xopt(net_rlen+1:net_rlen+addvar_num)'*ones(addvar_num,1);

% calculate minimized oxygen uptake rate
dispstr = sprintf('%5.1f second: calculating normalized oxygen uptake rate...',cputime-time0);
disp(dispstr)
milp_lb(net_rlen+addvar_num+addint_num+1:net_rlen+addvar_num+addint_num+exchconstr+1) = xopt(net_rlen+addvar_num+addint_num+1:net_rlen+addvar_num+addint_num+exchconstr+1);
milp_ub(net_rlen+addvar_num+addint_num+1:net_rlen+addvar_num+addint_num+exchconstr+1) = xopt(net_rlen+addvar_num+addint_num+1:net_rlen+addvar_num+addint_num+exchconstr+1);
milp_c = [ zeros(net_rlen,1); zeros(addvar_num,1); zeros(addint_num,1); zeros(exchconstr,1); 0; zeros(increasebio_num,1); 0 ];
milp_c(317) = -1;
milp_sense = 1;
params.tolbnd = 1e-8;
if addint_num==0
    [xopt, fmin, bnb_status, extra] = lpxf_b1 (milp_c, milp_a, milp_b, milp_lb, milp_ub, milp_ctype, milp_vartype, milp_sense,params);
    bnb_time = 0;
else
    [xopt, fmin, bnb_status, bnb_time, bnb_lambda] = bnb_milp013112 (milp_c, milp_a, milp_b, milp_lb, milp_ub, milp_ctype, milp_vartype, milp_sense,params,-1);
    reran_times = 0;
    while bnb_status~=5 && reran_times<=20
        milp_b(end) = milp_b(end)*1.0000001;
        [xopt, fmin, bnb_status, bnb_time, bnb_lambda] = bnb_milp013112 (milp_c, milp_a, milp_b, milp_lb, milp_ub, milp_ctype, milp_vartype, milp_sense,params,-1);
        reran_times = reran_times+1;
    end;
    if reran_times>20
        fprintf(1,'something wrong when minimizing oxygen uptake!\n');
    end;
end;
sumLO2 = xopt(net_rlen+1:net_rlen+addvar_num)'*ones(addvar_num,1);


%%% construct new network
%[ up_rlist varlist intlist rxn_direct uprxn_ratio multirxns ]
modelTBCm_new = modelTBCm;
% initial setting
for i = 1:net_rlen
    if modelTBCm.ub(i)<BigNum
        modelTBCm_new.ub(i) = modelTBCm.ub(i)/refbiomass*KK;
    end;
    if modelTBCm.lb(i)>-BigNum
        modelTBCm_new.lb(i) = modelTBCm.lb(i)/refbiomass*KK;
    end;
end;
modelTBCm_new.ub(bio_id) = KK;
modelTBCm_new.lb(bio_id) = KK;
modelTBCm_new.lb(317) = xopt(317);

% deal with uptake changes
newuptake_num = 0;
for i = 1:exchconstr
    if xopt(net_rlen+addvar_num+addint_num+i)>1e-6
        newuptake_num = newuptake_num+1;
    end;
end;
newuptake = zeros(newuptake_num,3);
newuptake_num = 0;
for i = 1:exchconstr
    if xopt(net_rlen+addvar_num+addint_num+i)>1e-6
        newuptake_num = newuptake_num+1;
        k = 0;
        for j = 1:net_rlen
            if add_flux(2*i-1,j)~=0
                k = j;
            end;
        end;
        newuptake(newuptake_num,1) = k;
        newuptake(newuptake_num,2) = add_bflux(2*i-1);
        newuptake(newuptake_num,3) = add_bflux(2*i-1)*(1+xopt(net_rlen+addvar_num+addint_num+i));
    end;
end;
newuptake;
for i = 1:length(newuptake(:,1))
    modelTBCm_new.lb(newuptake(i,1)) = -newuptake(i,3);
end;

% deal with biomass changes
newblist = -modelTBCm.S(:,bio_id);
newbiomass_num = 0;
for i = 1:increasebio_num
    if xopt(net_rlen+addvar_num+addint_num+exchconstr+1+i)>1e-10
        newbiomass_num = newbiomass_num+1;
    end;
end;
newbiomass = zeros(newbiomass_num,3);
newbiomass_num = 0;
for i = 1:increasebio_num
    if xopt(net_rlen+addvar_num+addint_num+exchconstr+1+i)>1e-10
        newbiomass_num = newbiomass_num+1;
        k = 0;
        for j = 1:net_mlen
            if add_mdissipate(j,i)<0
                k = j;
            end;
            if add_mdissipate(j,i)>0
                k = -j;
            end;
        end;
        if k>0
            newbiomass(newbiomass_num,1) = k;
            newbiomass(newbiomass_num,2) = -modelTBCm.S(k,bio_id);
            newbiomass(newbiomass_num,3) = -modelTBCm.S(k,bio_id)+xopt(net_rlen+addvar_num+addint_num+exchconstr+1+i);
            newblist(k) = -modelTBCm.S(k,bio_id)+xopt(net_rlen+addvar_num+addint_num+exchconstr+1+i);
        end;
        if k<0
            newbiomass(newbiomass_num,1) = -k;
            newbiomass(newbiomass_num,2) = -modelTBCm.S(-k,bio_id);
            newbiomass(newbiomass_num,3) = -modelTBCm.S(-k,bio_id)-xopt(net_rlen+addvar_num+addint_num+exchconstr+1+i);   
            newblist(-k) = -modelTBCm.S(-k,bio_id)-xopt(net_rlen+addvar_num+addint_num+exchconstr+1+i);
        end;
    end;
end;
newbiomass;
for i = 1:length(newbiomass(:,1))
    modelTBCm_new.S(newbiomass(i,1),bio_id) = -newbiomass(i,3);
end;

% set constraints based on gene expression data
multiindex = ones(multinum,1);
for i = 1:up_rlen
    if (multirxns(i)==0) 
        if uprxn_ratio(i)<1
            modelTBCm_new.ub(up_rlist(i)) = min(modelTBCm_new.ub(up_rlist(i)),upFref(i)/refbiomass*(uprxn_ratio(i)+xopt(net_rlen+varlist(i)))*KK);
            if upFref(i)/refbiomass < SmallF
                modelTBCm_new.ub(up_rlist(i)) = min(modelTBCm_new.ub(up_rlist(i)),upFref(i)/refbiomass*uprxn_ratio(i)*KK+SmallF*xopt(net_rlen+varlist(i))*KK);
            end;
            if rxn_direct(i)==2
                modelTBCm_new.lb(up_rlist(i)) = max(modelTBCm_new.lb(up_rlist(i)),-upFref(i)/refbiomass*(uprxn_ratio(i)+xopt(net_rlen+varlist(i)))*KK);
                if upFref(i)/refbiomass < SmallF
                    modelTBCm_new.lb(up_rlist(i)) = max(modelTBCm_new.lb(up_rlist(i)),-(upFref(i)/refbiomass*uprxn_ratio(i)*KK+SmallF*xopt(net_rlen+varlist(i))*KK));
                end;
            end;
        end;
        if uprxn_ratio(i)>1
            if rxn_direct(i)==1
                modelTBCm_new.lb(up_rlist(i)) = max(modelTBCm_new.lb(up_rlist(i)),upFref(i)/refbiomass*(uprxn_ratio(i)-xopt(net_rlen+varlist(i)))*KK);
                if upFref(i)/refbiomass < SmallF
                    modelTBCm_new.lb(up_rlist(i)) = max(modelTBCm_new.lb(up_rlist(i)),SmallF*(uprxn_ratio(i)-xopt(net_rlen+varlist(i)))*KK);
                end;                
            end;
            if rxn_direct(i)==-1
                modelTBCm_new.ub(up_rlist(i)) = min(modelTBCm_new.ub(up_rlist(i)),-upFref(i)/refbiomass*(uprxn_ratio(i)-xopt(net_rlen+varlist(i)))*KK);
                if upFref(i)/refbiomass < SmallF
                    modelTBCm_new.ub(up_rlist(i)) = min(modelTBCm_new.ub(up_rlist(i)),-SmallF*(uprxn_ratio(i)-xopt(net_rlen+varlist(i)))*KK);
                end;
            end;
            if rxn_direct(i)==2
                if xopt(net_rlen+addvar_num+intlist(i))==0
                    modelTBCm_new.lb(up_rlist(i)) = max(modelTBCm_new.lb(up_rlist(i)),upFref(i)/refbiomass*(uprxn_ratio(i)-xopt(net_rlen+varlist(i)))*KK);
                    if upFref(i)/refbiomass < SmallF
                        modelTBCm_new.lb(up_rlist(i)) = max(modelTBCm_new.lb(up_rlist(i)),SmallF*(uprxn_ratio(i)-xopt(net_rlen+varlist(i)))*KK);
                    end;
                end;
                if xopt(net_rlen+addvar_num+intlist(i))==1
                    modelTBCm_new.ub(up_rlist(i)) = min(modelTBCm_new.ub(up_rlist(i)),-upFref(i)/refbiomass*(uprxn_ratio(i)-xopt(net_rlen+varlist(i)))*KK);
                    if upFref(i)/refbiomass < SmallF
                        modelTBCm_new.ub(up_rlist(i)) = min(modelTBCm_new.ub(up_rlist(i)),-SmallF*(uprxn_ratio(i)-xopt(net_rlen+varlist(i)))*KK);
                    end;
                end;
            end;
        end;
    else
        if (multiindex(abs(multirxns(i)))==1)
            multiindex(abs(multirxns(i))) = 0;
            if uprxn_ratio(i)<1
                modelTBCm_new.ub(net_rlen-multinum+abs(multirxns(i))) = min(modelTBCm_new.ub(net_rlen-multinum+abs(multirxns(i))),upFrefc(abs(multirxns(i)))/refbiomass*(uprxn_ratio(i)+xopt(net_rlen+varlist(i)))*KK);
                if upFrefc(abs(multirxns(i)))/refbiomass < SmallF
                    modelTBCm_new.ub(net_rlen-multinum+abs(multirxns(i))) = min(modelTBCm_new.ub(net_rlen-multinum+abs(multirxns(i))),upFrefc(abs(multirxns(i)))/refbiomass*uprxn_ratio(i)*KK+SmallF*xopt(net_rlen+varlist(i))*KK);
                end;
                if rxn_direct(i)==2
                    modelTBCm_new.lb(net_rlen-multinum+abs(multirxns(i))) = max(modelTBCm_new.lb(net_rlen-multinum+abs(multirxns(i))),-upFrefc(abs(multirxns(i)))/refbiomass*(uprxn_ratio(i)+xopt(net_rlen+varlist(i)))*KK);
                    if upFrefc(abs(multirxns(i)))/refbiomass < SmallF
                        modelTBCm_new.lb(net_rlen-multinum+abs(multirxns(i))) = max(modelTBCm_new.lb(net_rlen-multinum+abs(multirxns(i))),-upFrefc(abs(multirxns(i)))/refbiomass*uprxn_ratio(i)*KK+SmallF*xopt(net_rlen+varlist(i))*KK);
                    end;
                end;
            end;
            if uprxn_ratio(i)>1
                if rxn_direct(i)==1
                    modelTBCm_new.lb(net_rlen-multinum+abs(multirxns(i))) = max(modelTBCm_new.lb(net_rlen-multinum+abs(multirxns(i))),upFrefc(abs(multirxns(i)))/refbiomass*(uprxn_ratio(i)-xopt(net_rlen+varlist(i)))*KK);
                    if upFrefc(abs(multirxns(i)))/refbiomass < SmallF
                        modelTBCm_new.lb(net_rlen-multinum+abs(multirxns(i))) = max(modelTBCm_new.lb(net_rlen-multinum+abs(multirxns(i))),SmallF*(uprxn_ratio(i)-xopt(net_rlen+varlist(i)))*KK);
                    end;
                end;
                if rxn_direct(i)==-1
                    modelTBCm_new.ub(net_rlen-multinum+abs(multirxns(i))) = min(modelTBCm_new.ub(net_rlen-multinum+abs(multirxns(i))),-upFrefc(abs(multirxns(i)))/refbiomass*(uprxn_ratio(i)-xopt(net_rlen+varlist(i)))*KK);
                    if upFrefc(abs(multirxns(i)))/refbiomass < SmallF
                        modelTBCm_new.ub(net_rlen-multinum+abs(multirxns(i))) = min(modelTBCm_new.ub(net_rlen-multinum+abs(multirxns(i))),-SmallF*(uprxn_ratio(i)-xopt(net_rlen+varlist(i)))*KK);
                    end;
                end;
                if rxn_direct(i)==2
                    if xopt(net_rlen+addvar_num+intlist(i))==0
                        modelTBCm_new.lb(net_rlen-multinum+abs(multirxns(i))) = max(modelTBCm_new.lb(net_rlen-multinum+abs(multirxns(i))),upFrefc(abs(multirxns(i)))/refbiomass*(uprxn_ratio(i)-xopt(net_rlen+varlist(i)))*KK);
                        if upFrefc(abs(multirxns(i)))/refbiomass < SmallF
                            modelTBCm_new.lb(net_rlen-multinum+abs(multirxns(i))) = max(modelTBCm_new.lb(net_rlen-multinum+abs(multirxns(i))),SmallF*(uprxn_ratio(i)-xopt(net_rlen+varlist(i)))*KK);
                        end;
                    end;
                    if xopt(net_rlen+addvar_num+intlist(i))==1
                        modelTBCm_new.ub(net_rlen-multinum+abs(multirxns(i))) = min(modelTBCm_new.ub(net_rlen-multinum+abs(multirxns(i))),-upFrefc(abs(multirxns(i)))/refbiomass*(uprxn_ratio(i)-xopt(net_rlen+varlist(i)))*KK);
                        if upFrefc(abs(multirxns(i)))/refbiomass < SmallF
                            modelTBCm_new.ub(net_rlen-multinum+abs(multirxns(i))) = min(modelTBCm_new.ub(net_rlen-multinum+abs(multirxns(i))),-SmallF*(uprxn_ratio(i)-xopt(net_rlen+varlist(i)))*KK);
                        end;
                    end;
                end;
            end;
        end;
    end;
end;

KKK = 0.5;
% initial setting
for i = 1:net_rlen
    if modelTBCm_new.ub(i)<BigNum
        modelTBCm_new.ub(i) = modelTBCm_new.ub(i)*KKK;
    end;
    if modelTBCm_new.lb(i)>-BigNum
        modelTBCm_new.lb(i) = modelTBCm_new.lb(i)*KKK;
    end;
end;

cvar = [ zeros(net_rlen,1); ones(length(uptake_id),1)];
avar = zeros(net_mlen+length(uptake_id),net_rlen+length(uptake_id));
avar(1:net_mlen,1:net_rlen) = modelTBCm_new.S;
for i = 1:length(uptake_id)
    avar(net_mlen+i,uptake_id(i)) = -1;
    avar(net_mlen+i,net_rlen+i) = -1;
end;
bvar = [ modelTBCm_new.b; zeros(length(uptake_id),1) ];
lbvar = [ modelTBCm_new.lb; zeros(length(uptake_id),1) ];
ubvar = [ modelTBCm_new.ub; BigNum*ones(length(uptake_id),1) ];
ctypevar(net_mlen+length(uptake_id)) = 'U';
for i = 1:net_mlen
    ctypevar(i) = 'S';
end;
for i = 1:length(uptake_id)
    ctypevar(net_mlen+i) = 'U';
end;
vartypevar(net_rlen+length(uptake_id)) = 'C';
for i = 1:net_rlen+length(uptake_id)
    vartypevar(i) = 'C';
end;
sensevar = 1;
paramsvar.tolbnd = 1e-8;
[xvar, fmin, statusvar, extra] = lpxf_b1 (cvar, avar, bvar, lbvar, ubvar, ctypevar, vartypevar, sensevar,paramsvar);
statusvar;
fmin;
uptake_limits = modelTBCm_new.lb(uptake_id);
for i = 1:length(uptake_id)
    modelTBCm_new.lb(uptake_id(i)) = -xvar(net_rlen+i);
end;


dispstr = sprintf('%5.1f second: calculating hypoxic fluxes...it might take around 6 minutes',cputime-time0);
disp(dispstr)
minFall1_new = zeros(net_rlen,1);
maxFall1_new = zeros(net_rlen,1);
status_new = zeros(net_rlen,2);
h = waitbar(0,'flux variability analysis ...');
for i = 1:net_rlen
    if mod(i,10) == 0
        waitbar(i/net_rlen,h);
    end
    
    modelTBCm_new.c(bio_id) = 0;
    modelTBCm_new.c(i) = 1;
    solutionTB = optimizeCbModel(modelTBCm_new,'max');
    maxF2 = solutionTB.f;
    if solutionTB.stat==1
        status_new(i,2) = 5;
    else
        status_new(i,2) = 0;
    end;
    modelTBCm_new.c(i) = -1;
    solutionTB = optimizeCbModel(modelTBCm_new,'max');
    minF2 = -solutionTB.f;
    if solutionTB.stat==1
        status_new(i,1) = 5;
    else
        status_new(i,1) = 0;
    end;
    % [i net_rlen minF2 maxF2 status_new(i,1) status_new(i,2) ]
    minFall1_new(i) = minF2;
    maxFall1_new(i) = maxF2;
    modelTBCm_new.c(i) = 0;
    modelTBCm_new.c(bio_id) = 1;    
end;
close(h);

newrxnset = find((minFall1_new<-5000)|(maxFall1_new>5000));
runloopless1_new;


if min(min(status_new))~=5 || max(max(status_new))~=5
    %fprintf(1,'something wrong in flux variability analysis!');
end;


% obtain a feasible new flux distribution
vtarget_new = zeros(net_rlen,1);
ctarget_new = [ ones(net_rlen-multinum,1);
            zeros(multinum,1) ];
%ctarget_new(find((status_new(:,1)~=5)|(status_new(:,2)~=5))) = 0;  
for i = 1:net_rlen
%     vtarget(i) = (abs(minFall3(i))+abs(maxFall3(i)))/2;
%     if (minFall3(i)+maxFall3(i))<0
%         vtarget(i) = -vtarget(i);
%     end;
    vtarget_new(i) = (minFall3_new(i)+maxFall3_new(i))/2;
end;
minFall3_new(find((status_new(:,1)~=5)|(status_new(:,2)~=5))) = minFall1_new(find((status_new(:,1)~=5)|(status_new(:,2)~=5)));
maxFall3_new(find((status_new(:,1)~=5)|(status_new(:,2)~=5))) = maxFall1_new(find((status_new(:,1)~=5)|(status_new(:,2)~=5)));

atar = [ eye(net_rlen) -eye(net_rlen); -eye(net_rlen) -eye(net_rlen); modelTBCm_new.S zeros(net_mlen,net_rlen) ];
btar = [ vtarget_new; -vtarget_new; modelTBCm_new.b ];
ctar = [ zeros(net_rlen,1); ctarget_new ];
%lbtar = [ modelTBCm_new.lb; zeros(net_rlen,1) ];
lbtar = [ minFall3_new; zeros(net_rlen,1) ];
%ubtar = [ modelTBCm_new.ub; BigNum*ones(net_rlen,1) ];
ubtar = [ maxFall3_new; BigNum*ones(net_rlen,1) ];
sensetar = 1;
paramstar.tolbnd = 1e-8;
vartypetar(1:(2*net_rlen)) = 'C';
ctypetar((2*net_rlen+1):(2*net_rlen+net_mlen)) = 'S';
ctypetar(1:(2*net_rlen)) = 'U';
[xopttar,fmin,status,extra] = lpxf_b1 (ctar,atar,btar,lbtar,ubtar,ctypetar,vartypetar,sensetar,paramstar);
%status
if status~=5
    fprintf('something wrong when calculating new flux distribution!');
end;
% [ vtarget(find(ctarget)) xopttar(find(ctarget)) ]/100
%fmin
v_new = xopttar(1:net_rlen);


minFall_new = v_new;
maxFall_new = v_new;

minFPCKnew = v_new(769)+v_new(816);
maxFPCKnew = v_new(769)+v_new(816);
minFFRDsnew = v_new(418)+v_new(421)+v_new(1060);
maxFFRDsnew = v_new(418)+v_new(421)+v_new(1060);
minFHEXnew = v_new(526)+v_new(822);
maxFHEXnew = v_new(526)+v_new(822);
minFPDHnew = v_new(760)+v_new(772);
maxFPDHnew = v_new(760)+v_new(772);
minFCSnew = v_new(168)-v_new(147);
maxFCSnew = v_new(168)-v_new(147);
minFSALnew = v_new(923)+v_new(924);
maxFSALnew = v_new(923)+v_new(924);
minFOXGDCnew = v_new(738)+v_new(739);
maxFOXGDCnew = v_new(738)+v_new(739);
minFPYKnew = v_new(870)-v_new(821);
maxFPYKnew = v_new(870)-v_new(821);

minATPall_new = full(sum(abs(v_new(1:net_rlen).*modelTBCm_new.S(181,:)'))/KK/KKK/2);
maxATPall_new = full(sum(abs(v_new(1:net_rlen).*modelTBCm_new.S(181,:)'))/KK/KKK/2);

KK = KK*KKK;

% display results
O2uptake = sprintf('\nNormalized Oxygen uptake    normoxia: %5.2f mmol/gDW   hypoxia: %5.2f mmol/gDW \n ',-(minFall(317)/refbiomass+maxFall(317)/refbiomass)/2,-(minFall_new(317)/KK+maxFall_new(317)/KK)/2);
disp(O2uptake)
disp('ATP levels (represented by overall flux associated with ATP)');
ATPdata = sprintf('    normoxia: %5.2e mmol/gDW/h   hypoxia: %5.2e mmol/gDW/h \n ',(minATPall_ref+maxATPall_ref)/2*refbiomass/100,(minATPall_new+maxATPall_new)/2*1.4e-5);
disp(ATPdata)

disp('change in coefficients of metabolistes in biomass function')
disp('met_id       met_name  normoxic-coef  hypoxic-coeff')
for i = 1:length(newbiomass(:,1))
    if i < length(newbiomass(:,1))
        newbios = sprintf('%5d  %15s    %5.1e      %5.1e',newbiomass(i,1),modelTBCm.mets{newbiomass(i,1)},newbiomass(i,2),newbiomass(i,3));
    else
        newbios = sprintf('%5d  %15s    %5.1e      %5.1e \n',newbiomass(i,1),modelTBCm.mets{newbiomass(i,1)},newbiomass(i,2),newbiomass(i,3));
    end;
    disp(newbios)
end;

disp('change in fluxes through central carbon metabolism');
disp('   reaction   flux ratio   pathway');
show_carbon_str = {'PPGK','PGI','PFK','FBA','GLYK','G3PD','TPI','GAPD','PGK','PGM','ENO','PYK','PDH','CS','ACONT','ICDH','PPCK','MDH','FUM','FRD','EX_succ'};
show_carbon = [ minFHEX     maxFHEX     minFHEXnew      maxFHEXnew      0 0 0;  %PPGK
                minFall(775) maxFall(775) minFall_new(775) maxFall_new(775)     0 0 0;%PGI
                minFall(771) maxFall(771) minFall_new(771) maxFall_new(771)     0 0 0;%PFK
                minFall(400) maxFall(400) minFall_new(400) maxFall_new(400)     0 0 0;%FBA
                minFall(495) maxFall(495) minFall_new(495) maxFall_new(495)     0 0 0;%GLYK
                minFall(445) maxFall(445) minFall_new(445) maxFall_new(445)     0 0 0;%G3PD
                minFall(969) maxFall(969) minFall_new(969) maxFall_new(969)     0 0 0;%TPI
                minFall(455) maxFall(455) minFall_new(455) maxFall_new(455)     0 0 0;%GAPD
                minFall(776) maxFall(776) minFall_new(776) maxFall_new(776)     0 0 0;%PGK
                minFall(780) maxFall(780) minFall_new(780) maxFall_new(780)     0 0 0;%PGM
                minFall(253) maxFall(253) minFall_new(253) maxFall_new(253)     0 0 0;%ENO
                minFPYK     maxFPYK     minFPYKnew      maxFPYKnew      0 0 0; %PYK
                minFPDH     maxFPDH     minFPDHnew      maxFPDHnew      0 0 0; %PDH
                minFCS      maxFCS      minFCSnew       maxFCSnew       0 0 0; %CS
                minFall(25)  maxFall(25)  minFall_new(25)  maxFall_new(25)      0 0 0;%ACONT
                minFall(546) maxFall(546) minFall_new(546) maxFall_new(546)     0 0 0;%ICDH
                minFPCK     maxFPCK     minFPCKnew      maxFPCKnew      0 0 0;%PPCK
                minFall(602) maxFall(602) minFall_new(602) maxFall_new(602)     0 0 0;%MDH
                minFall(429) maxFall(429) minFall_new(429) maxFall_new(429)     0 0 0;%FUM
                minFFRDs    maxFFRDs    minFFRDsnew     maxFFRDsnew     0 0 0;  %FRD
                minFall(334) maxFall(334) minFall_new(334) maxFall_new(334)     0 0 0]; %EX_succ

show_carbon(:,1:2) = show_carbon(:,1:2)/refbiomass;
show_carbon(:,3:4) = show_carbon(:,3:4)/KK;
show_carbon(:,5) = (abs(show_carbon(:,1))+abs(show_carbon(:,2)))/2;
show_carbon(:,6) = (abs(show_carbon(:,3))+abs(show_carbon(:,4)))/2;
show_carbon(:,7) = show_carbon(:,6)./show_carbon(:,5);
show_pathway = {'glycolysis','glycolysis','glycolysis','glycolysis','glycerol processing','glycerol processing','glycolysis','glycolysis','glycolysis','glycolysis','glycolysis','oxidative TCA cycle','oxidative TCA cycle','oxidative TCA cycle','oxidative TCA cycle','oxidative TCA cycle','reductive TCA cycle','reductive TCA cycle','reductive TCA cycle','reductive TCA cycle','Exchange'};
for i = 1:length(show_carbon_str)
    if i<length(show_carbon_str)
        carbonstr = sprintf('     %7s      %5.2f      %s',show_carbon_str{i},show_carbon(i,7),show_pathway{i});
    else
        carbonstr = sprintf('     %7s      %5.2f      %s\n',show_carbon_str{i},show_carbon(i,7),show_pathway{i});
    end;
    disp(carbonstr)
end;


%format long g;
%[ sumLfirst sumLbio  sumLuptake sumLO2 ]
%format short g;


timestr = sprintf('total time is %5.2f seconds',cputime-time0);
disp(timestr)


break;
