# Supplementary material for: Modeling Phenotypic Metabolic Adaptations of Mycobacterium tuberculosis H37Rv under Hypoxia
Source: PLoS Comput Biol. 2012 Sep 13;8(9):e1002688. doi: 10.1371/journal.pcbi.1002688 (PMC3441462; doi:10.1371/journal.pcbi.1002688)
Supplement: Protocol S1 — MATLAB-formatted models of metabolism for M. tuberculosis HR37v and its Δ dosR deletion mutant. (ZIP) [file pcbi.1002688.s001.zip › iNJ661m_SBML.xml]

<?xml version="1.0" encoding="UTF-8"?>
<sbml xmlns="http://www.sbml.org/sbml/level2" level="2" version="1">
  <model id="iNJ661m_SBML_xml" name="iNJ661m_SBML_xml">
    <notes>
      <html xmlns="http://www.w3.org/1999/xhtml"><p>COBRA_Toolbox</p></html>
    </notes>
    <listOfUnitDefinitions>
      <unitDefinition id="mmol_per_gDW_per_hr">
        <listOfUnits>
          <unit kind="mole" scale="-3" multiplier="1" offset="0"/>
          <unit kind="gram" exponent="-1" multiplier="1" offset="0"/>
          <unit kind="second" exponent="-1" multiplier="0.00027777" offset="0"/>
        </listOfUnits>
      </unitDefinition>
    </listOfUnitDefinitions>
    <listOfCompartments>
      <compartment id="C_c" name="Cytoplasm"/>
      <compartment id="C_e" name="Extracellular"/>
    </listOfCompartments>
    <listOfSpecies>
      <species id="M_10fthf_c" name="10-Formyltetrahydrofolate" compartment="C_c">
        <notes>
          <html xmlns="http://www.w3.org/1999/xhtml"><p>FORMULA: C20H21N7O7</p></html>
        </notes>
      </species>
      <species id="M_12dgr160_c" name="1-2-Diacyl-sn-glycerol-dihexadecanoyl-n-C160" compartment="C_c">
        <notes>
          <html xmlns="http://www.w3.org/1999/xhtml"><p>FORMULA: C35H68O5</p></html>
        </notes>
      </species>
      <species id="M_13dpg_c" name="3-Phospho-D-glyceroyl-phosphate" compartment="C_c">
        <notes>
          <html xmlns="http://www.w3.org/1999/xhtml"><p>FORMULA: C3H4O10P2</p></html>
        </notes>
      </species>
      <species id="M_1hdecg3p_c" name="1-hexadecanoyl-sn-glycerol-3-phosphate" compartment="C_c">
        <notes>
          <html xmlns="http://www.w3.org/1999/xhtml"><p>FORMULA: C19H37O7P1</p></html>
        </notes>
      </species>
      <species id="M_1msg3p_c" name="1-Acyl-sn-glycerol-3-phosphate-branched-C190" compartment="C_c">
        <notes>
          <html xmlns="http://www.w3.org/1999/xhtml"><p>FORMULA: C22H43O7P</p></html>
        </notes>
      </species>
      <species id="M_1pyr5c_c" name="1-Pyrroline-5-carboxylate" compartment="C_c">
        <notes>
          <html xmlns="http://www.w3.org/1999/xhtml"><p>FORMULA: C5H6NO2</p></html>
        </notes>
      </species>
      <species id="M_23dhba_c" name="2-3-Dihydroxybenzoyl-adenylate" compartment="C_c">
        <notes>
          <html xmlns="http://www.w3.org/1999/xhtml"><p>FORMULA: C17H17N5O10P</p></html>
        </notes>
      </species>
      <species id="M_23dhdp_c" name="2-3-Dihydrodipicolinate" compartment="C_c">
        <notes>
          <html xmlns="http://www.w3.org/1999/xhtml"><p>FORMULA: C7H5NO4</p></html>
        </notes>
      </species>
      <species id="M_23dhmb_c" name="R-2-3-Dihydroxy-3-methylbutanoate" compartment="C_c">
        <notes>
          <html xmlns="http://www.w3.org/1999/xhtml"><p>FORMULA: C5H9O4</p></html>
        </notes>
      </species>
      <species id="M_23dhmp_c" name="R-2-3-Dihydroxy-3-methylpentanoate" compartment="C_c">
        <notes>
          <html xmlns="http://www.w3.org/1999/xhtml"><p>FORMULA: C6H11O4</p></html>
        </notes>
      </species>
      <species id="M_25aics_c" name="S-2-5-Amino-1-5-phospho-D-ribosyl-imidazole-4-carboxamidosuccinate" compartment="C_c">
        <notes>
          <html xmlns="http://www.w3.org/1999/xhtml"><p>FORMULA: C13H15N4O12P</p></html>
        </notes>
      </species>
      <species id="M_25dhpp_c" name="2-5-Diamino-6-hydroxy-4-5-phosphoribosylamino-pyrimidine" compartment="C_c">
        <notes>
          <html xmlns="http://www.w3.org/1999/xhtml"><p>FORMULA: C9H14N5O8P</p></html>
        </notes>
      </species>
      <species id="M_25drapp_c" name="2-5-Diamino-6-ribosylamino-4-3H-pyrimidinone-5-phosphate" compartment="C_c">
        <notes>
          <html xmlns="http://www.w3.org/1999/xhtml"><p>FORMULA: C9H14N5O8P</p></html>
        </notes>
      </species>
      <species id="M_26dap_LL_c" name="LL-2-6-Diaminoheptanedioate" compartment="C_c">
        <notes>
          <html xmlns="http://www.w3.org/1999/xhtml"><p>FORMULA: C7H14N2O4</p></html>
        </notes>
      </species>
      <species id="M_26dap_M_c" name="meso-2-6-Diaminoheptanedioate" compartment="C_c">
        <notes>
          <html xmlns="http://www.w3.org/1999/xhtml"><p>FORMULA: C7H14N2O4</p></html>
        </notes>
      </species>
      <species id="M_2agpe160_c" name="2-Acyl-sn-glycero-3-phosphoethanolamine-n-C160" compartment="C_c">
        <notes>
          <html xmlns="http://www.w3.org/1999/xhtml"><p>FORMULA: C21H44NO7P1</p></html>
        </notes>
      </species>
      <species id="M_2agpe180_c" name="2-Acyl-sn-glycero-3-phosphoethanolamine-n-C180" compartment="C_c">
        <notes>
          <html xmlns="http://www.w3.org/1999/xhtml"><p>FORMULA: C23H48NO7P1</p></html>
        </notes>
      </species>
      <species id="M_2ahbut_c" name="S-2-Aceto-2-hydroxybutanoate" compartment="C_c">
        <notes>
          <html xmlns="http://www.w3.org/1999/xhtml"><p>FORMULA: C6H9O4</p></html>
        </notes>
      </species>
      <species id="M_2ahhmd_c" name="2-Amino-4-hydroxy-6-hydroxymethyl-7-8-dihydropteridine-diphosphate" compartment="C_c">
        <notes>
          <html xmlns="http://www.w3.org/1999/xhtml"><p>FORMULA: C7H8N5O8P2</p></html>
        </notes>
      </species>
      <species id="M_2ahhmp_c" name="2-Amino-4-hydroxy-6-hydroxymethyl-7-8-dihydropteridine" compartment="C_c">
        <notes>
          <html xmlns="http://www.w3.org/1999/xhtml"><p>FORMULA: C7H9N5O2</p></html>
        </notes>
      </species>
      <species id="M_2c25dho_c" name="2-Carboxy-2-5-dihydro-5-oxofuran-2-acetate" compartment="C_c">
        <notes>
          <html xmlns="http://www.w3.org/1999/xhtml"><p>FORMULA: C7H6O6</p></html>
        </notes>
      </species>
      <species id="M_2cpr5p_c" name="1-2-Carboxyphenylamino-1-deoxy-D-ribulose-5-phosphate" compartment="C_c">
        <notes>
          <html xmlns="http://www.w3.org/1999/xhtml"><p>FORMULA: C12H13NO9P</p></html>
        </notes>
      </species>
      <species id="M_2dda7p_c" name="2-Dehydro-3-deoxy-D-arabino-heptonate-7-phosphate" compartment="C_c">
        <notes>
          <html xmlns="http://www.w3.org/1999/xhtml"><p>FORMULA: C7H10O10P</p></html>
        </notes>
      </species>
      <species id="M_2dglcn_c" name="2-Deoxy-D-gluconate" compartment="C_c">
        <notes>
          <html xmlns="http://www.w3.org/1999/xhtml"><p>FORMULA: C6H11O6</p></html>
        </notes>
      </species>
      <species id="M_2dhp_c" name="2-Dehydropantoate" compartment="C_c">
        <notes>
          <html xmlns="http://www.w3.org/1999/xhtml"><p>FORMULA: C6H9O4</p></html>
        </notes>
      </species>
      <species id="M_2dmmq6_c" name="2-Demethylmenaquinone-6" compartment="C_c">
        <notes>
          <html xmlns="http://www.w3.org/1999/xhtml"><p>FORMULA: C40H54O2</p></html>
        </notes>
      </species>
      <species id="M_2dmmq8_c" name="2-Demethylmenaquinone-8" compartment="C_c">
        <notes>
          <html xmlns="http://www.w3.org/1999/xhtml"><p>FORMULA: C50H70O2</p></html>
        </notes>
      </species>
      <species id="M_2dmmql8_c" name="2-Demethylmenaquinol-8" compartment="C_c">
        <notes>
          <html xmlns="http://www.w3.org/1999/xhtml"><p>FORMULA: C50H72O2</p></html>
        </notes>
      </species>
      <species id="M_2dr1p_c" name="2-Deoxy-D-ribose-1-phosphate" compartment="C_c">
        <notes>
          <html xmlns="http://www.w3.org/1999/xhtml"><p>FORMULA: C5H9O7P</p></html>
        </notes>
      </species>
      <species id="M_2dr5p_c" name="2-Deoxy-D-ribose-5-phosphate" compartment="C_c">
        <notes>
          <html xmlns="http://www.w3.org/1999/xhtml"><p>FORMULA: C5H9O7P</p></html>
        </notes>
      </species>
      <species id="M_2ippm_c" name="2-Isopropylmaleate" compartment="C_c">
        <notes>
          <html xmlns="http://www.w3.org/1999/xhtml"><p>FORMULA: C7H8O4</p></html>
        </notes>
      </species>
      <species id="M_2mahmp_c" name="2-Methyl-4-amino-5-hydroxymethylpyrimidine-diphosphate" compartment="C_c">
        <notes>
          <html xmlns="http://www.w3.org/1999/xhtml"><p>FORMULA: C6H8N3O7P2</p></html>
        </notes>
      </species>
      <species id="M_2me4p_c" name="2-C-methyl-D-erythritol-4-phosphate" compartment="C_c">
        <notes>
          <html xmlns="http://www.w3.org/1999/xhtml"><p>FORMULA: C5H11O7P</p></html>
        </notes>
      </species>
      <species id="M_2mecdp_c" name="2-C-methyl-D-erythritol-2-4-cyclodiphosphate" compartment="C_c">
        <notes>
          <html xmlns="http://www.w3.org/1999/xhtml"><p>FORMULA: C5H10O9P2</p></html>
        </notes>
      </species>
      <species id="M_2mop_c" name="2-Methyl-3-oxopropanoate" compartment="C_c">
        <notes>
          <html xmlns="http://www.w3.org/1999/xhtml"><p>FORMULA: C4H5O3</p></html>
        </notes>
      </species>
      <species id="M_2obut_c" name="2-Oxobutanoate" compartment="C_c">
        <notes>
          <html xmlns="http://www.w3.org/1999/xhtml"><p>FORMULA: C4H5O3</p></html>
        </notes>
      </species>
      <species id="M_2p4c2me_c" name="2-phospho-4-cytidine-5-diphospho-2-C-methyl-D-erythritol" compartment="C_c">
        <notes>
          <html xmlns="http://www.w3.org/1999/xhtml"><p>FORMULA: C14H22N3O17P3</p></html>
        </notes>
      </species>
      <species id="M_2pg_c" name="D-Glycerate-2-phosphate" compartment="C_c">
        <notes>
          <html xmlns="http://www.w3.org/1999/xhtml"><p>FORMULA: C3H4O7P</p></html>
        </notes>
      </species>
      <species id="M_2pglyc_c" name="2-Phosphoglycolate" compartment="C_c">
        <notes>
          <html xmlns="http://www.w3.org/1999/xhtml"><p>FORMULA: C2H2O6P</p></html>
        </notes>
      </species>
      <species id="M_2shchc_c" name="2-Succinyl-6-hydroxy-2-4-cyclohexadiene-1-carboxylate" compartment="C_c">
        <notes>
          <html xmlns="http://www.w3.org/1999/xhtml"><p>FORMULA: C11H10O6</p></html>
        </notes>
      </species>
      <species id="M_34hpp_c" name="3-4-Hydroxyphenyl-pyruvate" compartment="C_c">
        <notes>
          <html xmlns="http://www.w3.org/1999/xhtml"><p>FORMULA: C9H7O4</p></html>
        </notes>
      </species>
      <species id="M_35cgmp_c" name="3-5-Cyclic-GMP" compartment="C_c">
        <notes>
          <html xmlns="http://www.w3.org/1999/xhtml"><p>FORMULA: C10H11N5O7P</p></html>
        </notes>
      </species>
      <species id="M_3c2hmp_c" name="3-Carboxy-2-hydroxy-4-methylpentanoate" compartment="C_c">
        <notes>
          <html xmlns="http://www.w3.org/1999/xhtml"><p>FORMULA: C7H10O5</p></html>
        </notes>
      </species>
      <species id="M_3c3hmp_c" name="3-Carboxy-3-hydroxy-4-methylpentanoate" compartment="C_c">
        <notes>
          <html xmlns="http://www.w3.org/1999/xhtml"><p>FORMULA: C7H10O5</p></html>
        </notes>
      </species>
      <species id="M_3c4mop_c" name="3-Carboxy-4-methyl-2-oxopentanoate" compartment="C_c">
        <notes>
          <html xmlns="http://www.w3.org/1999/xhtml"><p>FORMULA: C7H8O5</p></html>
        </notes>
      </species>
      <species id="M_3ddgc_c" name="3-Dehydro-2-deoxy-D-gluconate" compartment="C_c">
        <notes>
          <html xmlns="http://www.w3.org/1999/xhtml"><p>FORMULA: C6H9O6</p></html>
        </notes>
      </species>
      <species id="M_3dhq_c" name="3-Dehydroquinate" compartment="C_c">
        <notes>
          <html xmlns="http://www.w3.org/1999/xhtml"><p>FORMULA: C7H9O6</p></html>
        </notes>
      </species>
      <species id="M_3dhsk_c" name="3-Dehydroshikimate" compartment="C_c">
        <notes>
          <html xmlns="http://www.w3.org/1999/xhtml"><p>FORMULA: C7H7O5</p></html>
        </notes>
      </species>
      <species id="M_3ig3p_c" name="C-3-Indolyl-glycerol-3-phosphate" compartment="C_c">
        <notes>
          <html xmlns="http://www.w3.org/1999/xhtml"><p>FORMULA: C11H12NO6P</p></html>
        </notes>
      </species>
      <species id="M_3mob_c" name="3-Methyl-2-oxobutanoate" compartment="C_c">
        <notes>
          <html xmlns="http://www.w3.org/1999/xhtml"><p>FORMULA: C5H7O3</p></html>
        </notes>
      </species>
      <species id="M_3mop_c" name="S-3-Methyl-2-oxopentanoate" compartment="C_c">
        <notes>
          <html xmlns="http://www.w3.org/1999/xhtml"><p>FORMULA: C6H9O3</p></html>
        </notes>
      </species>
      <species id="M_3pg_c" name="3-Phospho-D-glycerate" compartment="C_c">
        <notes>
          <html xmlns="http://www.w3.org/1999/xhtml"><p>FORMULA: C3H4O7P</p></html>
        </notes>
      </species>
      <species id="M_3php_c" name="3-Phosphohydroxypyruvate" compartment="C_c">
        <notes>
          <html xmlns="http://www.w3.org/1999/xhtml"><p>FORMULA: C3H2O7P</p></html>
        </notes>
      </species>
      <species id="M_3psme_c" name="5-O-1-Carboxyvinyl-3-phosphoshikimate" compartment="C_c">
        <notes>
          <html xmlns="http://www.w3.org/1999/xhtml"><p>FORMULA: C10H9O10P</p></html>
        </notes>
      </species>
      <species id="M_4abut_c" name="4-Aminobutanoate" compartment="C_c">
        <notes>
          <html xmlns="http://www.w3.org/1999/xhtml"><p>FORMULA: C4H9NO2</p></html>
        </notes>
      </species>
      <species id="M_4abz_c" name="4-Aminobenzoate" compartment="C_c">
        <notes>
          <html xmlns="http://www.w3.org/1999/xhtml"><p>FORMULA: C7H6NO2</p></html>
        </notes>
      </species>
      <species id="M_4adcho_c" name="4-amino-4-deoxychorismate" compartment="C_c">
        <notes>
          <html xmlns="http://www.w3.org/1999/xhtml"><p>FORMULA: C10H10NO5</p></html>
        </notes>
      </species>
      <species id="M_4ahmmp_c" name="4-Amino-5-hydroxymethyl-2-methylpyrimidine" compartment="C_c">
        <notes>
          <html xmlns="http://www.w3.org/1999/xhtml"><p>FORMULA: C6H9N3O</p></html>
        </notes>
      </species>
      <species id="M_4ampm_c" name="4-Amino-2-methyl-5-phosphomethylpyrimidine" compartment="C_c">
        <notes>
          <html xmlns="http://www.w3.org/1999/xhtml"><p>FORMULA: C6H8N3O4P</p></html>
        </notes>
      </species>
      <species id="M_4c2me_c" name="4-cytidine-5-diphospho-2-C-methyl-D-erythritol" compartment="C_c">
        <notes>
          <html xmlns="http://www.w3.org/1999/xhtml"><p>FORMULA: C14H23N3O14P2</p></html>
        </notes>
      </species>
      <species id="M_4h2opntn_c" name="4-Hydroxy-2-oxopentanoate" compartment="C_c">
        <notes>
          <html xmlns="http://www.w3.org/1999/xhtml"><p>FORMULA: C5H7O4</p></html>
        </notes>
      </species>
      <species id="M_4hba_c" name="4-Hydroxy-benzyl-alcohol" compartment="C_c">
        <notes>
          <html xmlns="http://www.w3.org/1999/xhtml"><p>FORMULA: C7H8O2</p></html>
        </notes>
      </species>
      <species id="M_4hba_e" name="4-Hydroxy-benzyl-alcohol" compartment="C_e">
        <notes>
          <html xmlns="http://www.w3.org/1999/xhtml"><p>FORMULA: C7H8O2</p></html>
        </notes>
      </species>
      <species id="M_4hbzACP_c" name="4-hydroxybenzoyl-ACP" compartment="C_c">
        <notes>
          <html xmlns="http://www.w3.org/1999/xhtml"><p>FORMULA: C18H25N2O9PRS</p></html>
        </notes>
      </species>
      <species id="M_4hbz_c" name="4-Hydroxybenzoate" compartment="C_c">
        <notes>
          <html xmlns="http://www.w3.org/1999/xhtml"><p>FORMULA: C7H5O3</p></html>
        </notes>
      </species>
      <species id="M_4hthr_c" name="4-Hydroxy-L-threonine" compartment="C_c">
        <notes>
          <html xmlns="http://www.w3.org/1999/xhtml"><p>FORMULA: C4H9NO4</p></html>
        </notes>
      </species>
      <species id="M_4mhetz_c" name="4-Methyl-5-2-hydroxyethyl-thiazole" compartment="C_c">
        <notes>
          <html xmlns="http://www.w3.org/1999/xhtml"><p>FORMULA: C6H9NOS</p></html>
        </notes>
      </species>
      <species id="M_4mop_c" name="4-Methyl-2-oxopentanoate" compartment="C_c">
        <notes>
          <html xmlns="http://www.w3.org/1999/xhtml"><p>FORMULA: C6H9O3</p></html>
        </notes>
      </species>
      <species id="M_4mpetz_c" name="4-Methyl-5-2-phosphoethyl-thiazole" compartment="C_c">
        <notes>
          <html xmlns="http://www.w3.org/1999/xhtml"><p>FORMULA: C6H8NO4PS</p></html>
        </notes>
      </species>
      <species id="M_4pasp_c" name="4-Phospho-L-aspartate" compartment="C_c">
        <notes>
          <html xmlns="http://www.w3.org/1999/xhtml"><p>FORMULA: C4H6NO7P</p></html>
        </notes>
      </species>
      <species id="M_4per_c" name="4-Phospho-D-erythronate" compartment="C_c">
        <notes>
          <html xmlns="http://www.w3.org/1999/xhtml"><p>FORMULA: C4H6O8P</p></html>
        </notes>
      </species>
      <species id="M_4ppan_c" name="D-4-Phosphopantothenate" compartment="C_c">
        <notes>
          <html xmlns="http://www.w3.org/1999/xhtml"><p>FORMULA: C9H15NO8P</p></html>
        </notes>
      </species>
      <species id="M_4ppcys_c" name="N-R-4-Phosphopantothenoyl-L-cysteine" compartment="C_c">
        <notes>
          <html xmlns="http://www.w3.org/1999/xhtml"><p>FORMULA: C12H20N2O9PS</p></html>
        </notes>
      </species>
      <species id="M_4r5au_c" name="4-1-D-Ribitylamino-5-aminouracil" compartment="C_c">
        <notes>
          <html xmlns="http://www.w3.org/1999/xhtml"><p>FORMULA: C9H16N4O6</p></html>
        </notes>
      </species>
      <species id="M_5aizc_c" name="5-amino-1-5-phospho-D-ribosyl-imidazole-4-carboxylate" compartment="C_c">
        <notes>
          <html xmlns="http://www.w3.org/1999/xhtml"><p>FORMULA: C9H11N3O9P</p></html>
        </notes>
      </species>
      <species id="M_5aop_c" name="5-Amino-4-oxopentanoate" compartment="C_c">
        <notes>
          <html xmlns="http://www.w3.org/1999/xhtml"><p>FORMULA: C5H9NO3</p></html>
        </notes>
      </species>
      <species id="M_5aprbu_c" name="5-Amino-6-5-phosphoribitylamino-uracil" compartment="C_c">
        <notes>
          <html xmlns="http://www.w3.org/1999/xhtml"><p>FORMULA: C9H15N4O9P</p></html>
        </notes>
      </species>
      <species id="M_5apru_c" name="5-Amino-6-5-phosphoribosylamino-uracil" compartment="C_c">
        <notes>
          <html xmlns="http://www.w3.org/1999/xhtml"><p>FORMULA: C9H13N4O9P</p></html>
        </notes>
      </species>
      <species id="M_5caiz_c" name="5-phosphoribosyl-5-carboxyaminoimidazole" compartment="C_c">
        <notes>
          <html xmlns="http://www.w3.org/1999/xhtml"><p>FORMULA: C9H11N3O9P</p></html>
        </notes>
      </species>
      <species id="M_5dglcn_c" name="5-Dehydro-D-gluconate" compartment="C_c">
        <notes>
          <html xmlns="http://www.w3.org/1999/xhtml"><p>FORMULA: C6H9O7</p></html>
        </notes>
      </species>
      <species id="M_5fthf_c" name="5-Formyltetrahydrofolate" compartment="C_c">
        <notes>
          <html xmlns="http://www.w3.org/1999/xhtml"><p>FORMULA: C20H21N7O7</p></html>
        </notes>
      </species>
      <species id="M_5mta_c" name="5-Methylthioadenosine" compartment="C_c">
        <notes>
          <html xmlns="http://www.w3.org/1999/xhtml"><p>FORMULA: C11H15N5O3S</p></html>
        </notes>
      </species>
      <species id="M_5mthf_c" name="5-Methyltetrahydrofolate" compartment="C_c">
        <notes>
          <html xmlns="http://www.w3.org/1999/xhtml"><p>FORMULA: C20H24N7O6</p></html>
        </notes>
      </species>
      <species id="M_5mtr_c" name="5-Methylthio-D-ribose" compartment="C_c">
        <notes>
          <html xmlns="http://www.w3.org/1999/xhtml"><p>FORMULA: C6H12O4S</p></html>
        </notes>
      </species>
      <species id="M_5odhf2a_c" name="5-Oxo-4-5-dihydrofuran-2-acetate" compartment="C_c">
        <notes>
          <html xmlns="http://www.w3.org/1999/xhtml"><p>FORMULA: C6H5O4</p></html>
        </notes>
      </species>
      <species id="M_5oxpro_c" name="5-Oxoproline" compartment="C_c">
        <notes>
          <html xmlns="http://www.w3.org/1999/xhtml"><p>FORMULA: C5H6NO3</p></html>
        </notes>
      </species>
      <species id="M_5prdmbz_c" name="N1-5-Phospho-alpha-D-ribosyl-5-6-dimethylbenzimidazole" compartment="C_c">
        <notes>
          <html xmlns="http://www.w3.org/1999/xhtml"><p>FORMULA: C14H17N2O7P</p></html>
        </notes>
      </species>
      <species id="M_6hmhpt_c" name="6-hydroxymethyl-dihydropterin" compartment="C_c">
        <notes>
          <html xmlns="http://www.w3.org/1999/xhtml"><p>FORMULA: C7H9N5O2</p></html>
        </notes>
      </species>
      <species id="M_6hmhptpp_c" name="6-hydroxymethyl-dihydropterin-pyrophosphate" compartment="C_c">
        <notes>
          <html xmlns="http://www.w3.org/1999/xhtml"><p>FORMULA: C7H8N5O8P2</p></html>
        </notes>
      </species>
      <species id="M_6pgc_c" name="6-Phospho-D-gluconate" compartment="C_c">
        <notes>
          <html xmlns="http://www.w3.org/1999/xhtml"><p>FORMULA: C6H10O10P</p></html>
        </notes>
      </species>
      <species id="M_6pgl_c" name="6-phospho-D-glucono-1-5-lactone" compartment="C_c">
        <notes>
          <html xmlns="http://www.w3.org/1999/xhtml"><p>FORMULA: C6H9O9P</p></html>
        </notes>
      </species>
      <species id="M_8aonn_c" name="8-Amino-7-oxononanoate" compartment="C_c">
        <notes>
          <html xmlns="http://www.w3.org/1999/xhtml"><p>FORMULA: C9H17NO3</p></html>
        </notes>
      </species>
      <species id="M_ACP_c" name="acyl-carrier-protein" compartment="C_c">
        <notes>
          <html xmlns="http://www.w3.org/1999/xhtml"><p>FORMULA: C11H21N2O7PRS</p></html>
        </notes>
      </species>
      <species id="M_Ac1PIM1_c" name="acyl-phosphatidylinositol-mannoside-tuberculosis" compartment="C_c">
        <notes>
          <html xmlns="http://www.w3.org/1999/xhtml"><p>FORMULA: C66H124O19P</p></html>
        </notes>
      </species>
      <species id="M_Ac1PIM2_c" name="acyl-phosphatidylinositol-mannoside-di-mannose-tuberculosis" compartment="C_c">
        <notes>
          <html xmlns="http://www.w3.org/1999/xhtml"><p>FORMULA: C72H134O24P</p></html>
        </notes>
      </species>
      <species id="M_Ac1PIM3_c" name="acyl-phosphatidylinositol-mannoside-tri-mannose-tuberculosis" compartment="C_c">
        <notes>
          <html xmlns="http://www.w3.org/1999/xhtml"><p>FORMULA: C78H144O29P</p></html>
        </notes>
      </species>
      <species id="M_Ac1PIM4_c" name="acyl-phosphatidylinositol-mannoside-tetra-mannose-tuberculosis" compartment="C_c">
        <notes>
          <html xmlns="http://www.w3.org/1999/xhtml"><p>FORMULA: C84H154O34P</p></html>
        </notes>
      </species>
      <species id="M_Ac2PIM2_c" name="di-acyl-phosphatidylinositol-mannoside-di-mannose-tuberculosis" compartment="C_c">
        <notes>
          <html xmlns="http://www.w3.org/1999/xhtml"><p>FORMULA: C88H164O25P</p></html>
        </notes>
      </species>
      <species id="M_PIM1_c" name="phosphatidylinositol-mannoside-tuberculosis" compartment="C_c">
        <notes>
          <html xmlns="http://www.w3.org/1999/xhtml"><p>FORMULA: C50H94O18P</p></html>
        </notes>
      </species>
      <species id="M_PIM2_c" name="phosphatidylinositol-mannoside-di-mannose-tuberculosis" compartment="C_c">
        <notes>
          <html xmlns="http://www.w3.org/1999/xhtml"><p>FORMULA: C56H104O23P</p></html>
        </notes>
      </species>
      <species id="M_PIM3_c" name="phosphatidylinositol-mannoside-tri-mannose-tuberculosis" compartment="C_c">
        <notes>
          <html xmlns="http://www.w3.org/1999/xhtml"><p>FORMULA: C62H114O28P</p></html>
        </notes>
      </species>
      <species id="M_PIM4_c" name="phosphatidylinositol-mannoside-tetra-mannose-tuberculosis" compartment="C_c">
        <notes>
          <html xmlns="http://www.w3.org/1999/xhtml"><p>FORMULA: C68H124O33P</p></html>
        </notes>
      </species>
      <species id="M_PIM5_c" name="phosphatidylinositol-mannoside-penta-mannose-tuberculosis" compartment="C_c">
        <notes>
          <html xmlns="http://www.w3.org/1999/xhtml"><p>FORMULA: C74H134O38P</p></html>
        </notes>
      </species>
      <species id="M_PIM6_c" name="phosphatidylinositol-mannoside-hexa-mannose-tuberculosis" compartment="C_c">
        <notes>
          <html xmlns="http://www.w3.org/1999/xhtml"><p>FORMULA: C80H144O43P</p></html>
        </notes>
      </species>
      <species id="M_aacoa_c" name="Acetoacetyl-CoA" compartment="C_c">
        <notes>
          <html xmlns="http://www.w3.org/1999/xhtml"><p>FORMULA: C25H36N7O18P3S</p></html>
        </notes>
      </species>
      <species id="M_ac_c" name="Acetate" compartment="C_c">
        <notes>
          <html xmlns="http://www.w3.org/1999/xhtml"><p>FORMULA: C2H3O2</p></html>
        </notes>
      </species>
      <species id="M_acac_c" name="Acetoacetate" compartment="C_c">
        <notes>
          <html xmlns="http://www.w3.org/1999/xhtml"><p>FORMULA: C4H5O3</p></html>
        </notes>
      </species>
      <species id="M_acald_c" name="Acetaldehyde" compartment="C_c">
        <notes>
          <html xmlns="http://www.w3.org/1999/xhtml"><p>FORMULA: C2H4O</p></html>
        </notes>
      </species>
      <species id="M_accoa_c" name="Acetyl-CoA" compartment="C_c">
        <notes>
          <html xmlns="http://www.w3.org/1999/xhtml"><p>FORMULA: C23H34N7O17P3S</p></html>
        </notes>
      </species>
      <species id="M_acg5p_c" name="N-Acetyl-L-glutamyl-5-phosphate" compartment="C_c">
        <notes>
          <html xmlns="http://www.w3.org/1999/xhtml"><p>FORMULA: C7H9NO8P</p></html>
        </notes>
      </species>
      <species id="M_acg5sa_c" name="N-Acetyl-L-glutamate-5-semialdehyde" compartment="C_c">
        <notes>
          <html xmlns="http://www.w3.org/1999/xhtml"><p>FORMULA: C7H10NO4</p></html>
        </notes>
      </species>
      <species id="M_acgam1p_c" name="N-Acetyl-D-glucosamine-1-phosphate" compartment="C_c">
        <notes>
          <html xmlns="http://www.w3.org/1999/xhtml"><p>FORMULA: C8H14NO9P</p></html>
        </notes>
      </species>
      <species id="M_acgam6p_c" name="N-Acetyl-D-glucosamine-6-phosphate" compartment="C_c">
        <notes>
          <html xmlns="http://www.w3.org/1999/xhtml"><p>FORMULA: C8H14NO9P</p></html>
        </notes>
      </species>
      <species id="M_acgam_c" name="N-Acetyl-D-glucosamine" compartment="C_c">
        <notes>
          <html xmlns="http://www.w3.org/1999/xhtml"><p>FORMULA: C8H15NO6</p></html>
        </notes>
      </species>
      <species id="M_acglu_c" name="N-Acetyl-L-glutamate" compartment="C_c">
        <notes>
          <html xmlns="http://www.w3.org/1999/xhtml"><p>FORMULA: C7H9NO5</p></html>
        </notes>
      </species>
      <species id="M_achms_c" name="O-Acetyl-L-homoserine" compartment="C_c">
        <notes>
          <html xmlns="http://www.w3.org/1999/xhtml"><p>FORMULA: C6H11NO4</p></html>
        </notes>
      </species>
      <species id="M_acorn_c" name="N2-Acetyl-L-ornithine" compartment="C_c">
        <notes>
          <html xmlns="http://www.w3.org/1999/xhtml"><p>FORMULA: C7H14N2O3</p></html>
        </notes>
      </species>
      <species id="M_acser_c" name="O-Acetyl-L-serine" compartment="C_c">
        <notes>
          <html xmlns="http://www.w3.org/1999/xhtml"><p>FORMULA: C5H9NO4</p></html>
        </notes>
      </species>
      <species id="M_actp_c" name="Acetyl-phosphate" compartment="C_c">
        <notes>
          <html xmlns="http://www.w3.org/1999/xhtml"><p>FORMULA: C2H3O5P</p></html>
        </notes>
      </species>
      <species id="M_acysbmn_c" name="acetyl-cystine-bimane" compartment="C_c">
        <notes>
          <html xmlns="http://www.w3.org/1999/xhtml"><p>FORMULA: C15H18N3O5S</p></html>
        </notes>
      </species>
      <species id="M_acysbmn_e" name="acetyl-cystine-bimane" compartment="C_e">
        <notes>
          <html xmlns="http://www.w3.org/1999/xhtml"><p>FORMULA: C15H18N3O5S</p></html>
        </notes>
      </species>
      <species id="M_ad_c" name="acetamide" compartment="C_c">
        <notes>
          <html xmlns="http://www.w3.org/1999/xhtml"><p>FORMULA: C2H5NO</p></html>
        </notes>
      </species>
      <species id="M_adcobdam_c" name="Adenosyl-cobyrinate-diamide" compartment="C_c">
        <notes>
          <html xmlns="http://www.w3.org/1999/xhtml"><p>FORMULA: C55H68CoN11O15</p></html>
        </notes>
      </species>
      <species id="M_adcobhex_c" name="adenosyl-cobyric-acid" compartment="C_c">
        <notes>
          <html xmlns="http://www.w3.org/1999/xhtml"><p>FORMULA: C55H76CoN15O11</p></html>
        </notes>
      </species>
      <species id="M_ade_c" name="Adenine" compartment="C_c">
        <notes>
          <html xmlns="http://www.w3.org/1999/xhtml"><p>FORMULA: C5H5N5</p></html>
        </notes>
      </species>
      <species id="M_adfdOX_c" name="Oxidized-adrenal-ferredoxin" compartment="C_c">
        <notes>
          <html xmlns="http://www.w3.org/1999/xhtml"><p>FORMULA: UK</p></html>
        </notes>
      </species>
      <species id="M_adfdRD_c" name="Reduced-adrenal-ferredoxin" compartment="C_c">
        <notes>
          <html xmlns="http://www.w3.org/1999/xhtml"><p>FORMULA: UKH2</p></html>
        </notes>
      </species>
      <species id="M_adhlam_c" name="S-Acetyldihydrolipoamide" compartment="C_c">
        <notes>
          <html xmlns="http://www.w3.org/1999/xhtml"><p>FORMULA: C10H19NO2S2</p></html>
        </notes>
      </species>
      <species id="M_adn_c" name="Adenosine" compartment="C_c">
        <notes>
          <html xmlns="http://www.w3.org/1999/xhtml"><p>FORMULA: C10H13N5O4</p></html>
        </notes>
      </species>
      <species id="M_adocbi_c" name="Adenosyl-cobinamide" compartment="C_c">
        <notes>
          <html xmlns="http://www.w3.org/1999/xhtml"><p>FORMULA: C58H84CoN16O11</p></html>
        </notes>
      </species>
      <species id="M_adocbip_c" name="Adenosyl-cobinamide-phosphate" compartment="C_c">
        <notes>
          <html xmlns="http://www.w3.org/1999/xhtml"><p>FORMULA: C58H83CoN16O14P</p></html>
        </notes>
      </species>
      <species id="M_adocbl_c" name="Adenosylcobalamin" compartment="C_c">
        <notes>
          <html xmlns="http://www.w3.org/1999/xhtml"><p>FORMULA: C72H100CoN18O17P</p></html>
        </notes>
      </species>
      <species id="M_adp_c" name="ADP" compartment="C_c">
        <notes>
          <html xmlns="http://www.w3.org/1999/xhtml"><p>FORMULA: C10H12N5O10P2</p></html>
        </notes>
      </species>
      <species id="M_adpglc_c" name="ADPglucose" compartment="C_c">
        <notes>
          <html xmlns="http://www.w3.org/1999/xhtml"><p>FORMULA: C16H23N5O15P2</p></html>
        </notes>
      </species>
      <species id="M_agalfragund_c" name="arabinofuranose-galactofuranosyl-30-rhamanosyl-N-acetylglucosamyl-undecaprenyl-diphosphate-M-tb" compartment="C_c">
        <notes>
          <html xmlns="http://www.w3.org/1999/xhtml"><p>FORMULA: C254H423NO171P2</p></html>
        </notes>
      </species>
      <species id="M_agdpcbi_c" name="Adenosine-GDP-cobinamide" compartment="C_c">
        <notes>
          <html xmlns="http://www.w3.org/1999/xhtml"><p>FORMULA: C68H95CoN21O21P2</p></html>
        </notes>
      </species>
      <species id="M_agm_c" name="Agmatine" compartment="C_c">
        <notes>
          <html xmlns="http://www.w3.org/1999/xhtml"><p>FORMULA: C5H16N4</p></html>
        </notes>
      </species>
      <species id="M_ahcys_c" name="S-Adenosyl-L-homocysteine" compartment="C_c">
        <notes>
          <html xmlns="http://www.w3.org/1999/xhtml"><p>FORMULA: C14H20N6O5S</p></html>
        </notes>
      </species>
      <species id="M_ahdt_c" name="2-Amino-4-hydroxy-6-erythro-1-2-3-trihydroxypropyl-dihydropteridine-triphosphate" compartment="C_c">
        <notes>
          <html xmlns="http://www.w3.org/1999/xhtml"><p>FORMULA: C9H12N5O13P3</p></html>
        </notes>
      </species>
      <species id="M_aicar_c" name="5-Amino-1-5-Phospho-D-ribosyl-imidazole-4-carboxamide" compartment="C_c">
        <notes>
          <html xmlns="http://www.w3.org/1999/xhtml"><p>FORMULA: C9H13N4O8P</p></html>
        </notes>
      </species>
      <species id="M_air_c" name="5-amino-1-5-phospho-D-ribosyl-imidazole" compartment="C_c">
        <notes>
          <html xmlns="http://www.w3.org/1999/xhtml"><p>FORMULA: C8H12N3O7P</p></html>
        </notes>
      </species>
      <species id="M_akg_c" name="2-Oxoglutarate" compartment="C_c">
        <notes>
          <html xmlns="http://www.w3.org/1999/xhtml"><p>FORMULA: C5H4O5</p></html>
        </notes>
      </species>
      <species id="M_ala_B_c" name="beta-Alanine" compartment="C_c">
        <notes>
          <html xmlns="http://www.w3.org/1999/xhtml"><p>FORMULA: C3H7NO2</p></html>
        </notes>
      </species>
      <species id="M_ala_B_e" name="beta-Alanine" compartment="C_e">
        <notes>
          <html xmlns="http://www.w3.org/1999/xhtml"><p>FORMULA: C3H7NO2</p></html>
        </notes>
      </species>
      <species id="M_ala_D_c" name="D-Alanine" compartment="C_c">
        <notes>
          <html xmlns="http://www.w3.org/1999/xhtml"><p>FORMULA: C3H7NO2</p></html>
        </notes>
      </species>
      <species id="M_ala_D_e" name="D-Alanine" compartment="C_e">
        <notes>
          <html xmlns="http://www.w3.org/1999/xhtml"><p>FORMULA: C3H7NO2</p></html>
        </notes>
      </species>
      <species id="M_ala_L_c" name="L-Alanine" compartment="C_c">
        <notes>
          <html xmlns="http://www.w3.org/1999/xhtml"><p>FORMULA: C3H7NO2</p></html>
        </notes>
      </species>
      <species id="M_ala_L_e" name="L-Alanine" compartment="C_e">
        <notes>
          <html xmlns="http://www.w3.org/1999/xhtml"><p>FORMULA: C3H7NO2</p></html>
        </notes>
      </species>
      <species id="M_alaala_c" name="D-Alanyl-D-alanine" compartment="C_c">
        <notes>
          <html xmlns="http://www.w3.org/1999/xhtml"><p>FORMULA: C6H12N2O3</p></html>
        </notes>
      </species>
      <species id="M_alac_S_c" name="S-2-Acetolactate" compartment="C_c">
        <notes>
          <html xmlns="http://www.w3.org/1999/xhtml"><p>FORMULA: C5H7O4</p></html>
        </notes>
      </species>
      <species id="M_alatrna_c" name="L-Alanyl-tRNA-Ala" compartment="C_c">
        <notes>
          <html xmlns="http://www.w3.org/1999/xhtml"><p>FORMULA: C3H6NOR</p></html>
        </notes>
      </species>
      <species id="M_alpam_c" name="S-aminomethyldihydrolipoamide" compartment="C_c">
        <notes>
          <html xmlns="http://www.w3.org/1999/xhtml"><p>FORMULA: C9H21N2OS2</p></html>
        </notes>
      </species>
      <species id="M_alpro_c" name="S-Aminomethyldihydrolipoylprotein" compartment="C_c">
        <notes>
          <html xmlns="http://www.w3.org/1999/xhtml"><p>FORMULA: CH6NS2X</p></html>
        </notes>
      </species>
      <species id="M_amet_c" name="S-Adenosyl-L-methionine" compartment="C_c">
        <notes>
          <html xmlns="http://www.w3.org/1999/xhtml"><p>FORMULA: C15H23N6O5S</p></html>
        </notes>
      </species>
      <species id="M_ametam_c" name="S-Adenosylmethioninamine" compartment="C_c">
        <notes>
          <html xmlns="http://www.w3.org/1999/xhtml"><p>FORMULA: C14H24N6O3S</p></html>
        </notes>
      </species>
      <species id="M_amob_c" name="S-Adenosyl-4-methylthio-2-oxobutanoate" compartment="C_c">
        <notes>
          <html xmlns="http://www.w3.org/1999/xhtml"><p>FORMULA: C15H19N5O6S</p></html>
        </notes>
      </species>
      <species id="M_amp_c" name="AMP" compartment="C_c">
        <notes>
          <html xmlns="http://www.w3.org/1999/xhtml"><p>FORMULA: C10H12N5O7P</p></html>
        </notes>
      </species>
      <species id="M_anth_c" name="Anthranilate" compartment="C_c">
        <notes>
          <html xmlns="http://www.w3.org/1999/xhtml"><p>FORMULA: C7H6NO2</p></html>
        </notes>
      </species>
      <species id="M_apoACP_c" name="apoprotein-acyl-carrier-protein" compartment="C_c">
        <notes>
          <html xmlns="http://www.w3.org/1999/xhtml"><p>FORMULA: RHO</p></html>
        </notes>
      </species>
      <species id="M_appl_c" name="1-Aminopropan-2-ol" compartment="C_c">
        <notes>
          <html xmlns="http://www.w3.org/1999/xhtml"><p>FORMULA: C3H10NO</p></html>
        </notes>
      </species>
      <species id="M_applp_c" name="D-1-Aminopropan-2-ol-O-phosphate" compartment="C_c">
        <notes>
          <html xmlns="http://www.w3.org/1999/xhtml"><p>FORMULA: C3H9NO4P</p></html>
        </notes>
      </species>
      <species id="M_aps_c" name="Adenosine-5-phosphosulfate" compartment="C_c">
        <notes>
          <html xmlns="http://www.w3.org/1999/xhtml"><p>FORMULA: C10H12N5O10PS</p></html>
        </notes>
      </species>
      <species id="M_arab_D_c" name="D-Arabinose" compartment="C_c">
        <notes>
          <html xmlns="http://www.w3.org/1999/xhtml"><p>FORMULA: C5H10O5</p></html>
        </notes>
      </species>
      <species id="M_arab_D_e" name="D-Arabinose" compartment="C_e">
        <notes>
          <html xmlns="http://www.w3.org/1999/xhtml"><p>FORMULA: C5H10O5</p></html>
        </notes>
      </species>
      <species id="M_arab_L_c" name="L-Arabinose" compartment="C_c">
        <notes>
          <html xmlns="http://www.w3.org/1999/xhtml"><p>FORMULA: C5H10O5</p></html>
        </notes>
      </species>
      <species id="M_arab_L_e" name="L-Arabinose" compartment="C_e">
        <notes>
          <html xmlns="http://www.w3.org/1999/xhtml"><p>FORMULA: C5H10O5</p></html>
        </notes>
      </species>
      <species id="M_arabinan_c" name="arabinan-complex-Mtb" compartment="C_c">
        <notes>
          <html xmlns="http://www.w3.org/1999/xhtml"><p>FORMULA: C684H1104O552</p></html>
        </notes>
      </species>
      <species id="M_arabinanagalfragund_c" name="arabinan-arabinofuranose-galactofuranosyl-30-rhamanosyl-N-acetylglucosamyl-undecaprenyl-diphosphate-M-tb" compartment="C_c">
        <notes>
          <html xmlns="http://www.w3.org/1999/xhtml"><p>FORMULA: C938H1525NO722P2</p></html>
        </notes>
      </species>
      <species id="M_arachACP_c" name="eicosanoyl-ACP" compartment="C_c">
        <notes>
          <html xmlns="http://www.w3.org/1999/xhtml"><p>FORMULA: C31H59N2O8PRS</p></html>
        </notes>
      </species>
      <species id="M_arach_c" name="Arachidic-acid" compartment="C_c">
        <notes>
          <html xmlns="http://www.w3.org/1999/xhtml"><p>FORMULA: C20H39O2</p></html>
        </notes>
      </species>
      <species id="M_arachcoa_c" name="arachidyl-coenzyme-A" compartment="C_c">
        <notes>
          <html xmlns="http://www.w3.org/1999/xhtml"><p>FORMULA: C41H70N7O17P3S</p></html>
        </notes>
      </species>
      <species id="M_arg_L_c" name="L-Arginine" compartment="C_c">
        <notes>
          <html xmlns="http://www.w3.org/1999/xhtml"><p>FORMULA: C6H15N4O2</p></html>
        </notes>
      </species>
      <species id="M_arg_L_e" name="L-Arginine" compartment="C_e">
        <notes>
          <html xmlns="http://www.w3.org/1999/xhtml"><p>FORMULA: C6H15N4O2</p></html>
        </notes>
      </species>
      <species id="M_argsuc_c" name="N-omega-L-Arginino-succinate" compartment="C_c">
        <notes>
          <html xmlns="http://www.w3.org/1999/xhtml"><p>FORMULA: C10H17N4O6</p></html>
        </notes>
      </species>
      <species id="M_arpp_c" name="5-phosphoarabinose-pyrophosphate" compartment="C_c">
        <notes>
          <html xmlns="http://www.w3.org/1999/xhtml"><p>FORMULA: C5H8O14P3</p></html>
        </notes>
      </species>
      <species id="M_asn_L_c" name="L-Asparagine" compartment="C_c">
        <notes>
          <html xmlns="http://www.w3.org/1999/xhtml"><p>FORMULA: C4H8N2O3</p></html>
        </notes>
      </species>
      <species id="M_asn_L_e" name="L-Asparagine" compartment="C_e">
        <notes>
          <html xmlns="http://www.w3.org/1999/xhtml"><p>FORMULA: C4H8N2O3</p></html>
        </notes>
      </species>
      <species id="M_asp_L_c" name="L-Aspartate" compartment="C_c">
        <notes>
          <html xmlns="http://www.w3.org/1999/xhtml"><p>FORMULA: C4H6NO4</p></html>
        </notes>
      </species>
      <species id="M_asp_L_e" name="L-Aspartate" compartment="C_e">
        <notes>
          <html xmlns="http://www.w3.org/1999/xhtml"><p>FORMULA: C4H6NO4</p></html>
        </notes>
      </species>
      <species id="M_aspsa_c" name="L-Aspartate-4-semialdehyde" compartment="C_c">
        <notes>
          <html xmlns="http://www.w3.org/1999/xhtml"><p>FORMULA: C4H7NO3</p></html>
        </notes>
      </species>
      <species id="M_atp_c" name="ATP" compartment="C_c">
        <notes>
          <html xmlns="http://www.w3.org/1999/xhtml"><p>FORMULA: C10H12N5O13P3</p></html>
        </notes>
      </species>
      <species id="M_atp_e" name="ATP" compartment="C_e">
        <notes>
          <html xmlns="http://www.w3.org/1999/xhtml"><p>FORMULA: C10H12N5O13P3</p></html>
        </notes>
      </species>
      <species id="M_betald_c" name="Betaine-aldehyde" compartment="C_c">
        <notes>
          <html xmlns="http://www.w3.org/1999/xhtml"><p>FORMULA: C5H12NO</p></html>
        </notes>
      </species>
      <species id="M_bhb_c" name="R-3-Hydroxybutanoate" compartment="C_c">
        <notes>
          <html xmlns="http://www.w3.org/1999/xhtml"><p>FORMULA: C4H7O3</p></html>
        </notes>
      </species>
      <species id="M_bmn_c" name="bimane" compartment="C_c">
        <notes>
          <html xmlns="http://www.w3.org/1999/xhtml"><p>FORMULA: C10H12N2O2</p></html>
        </notes>
      </species>
      <species id="M_bmn_e" name="bimane" compartment="C_e">
        <notes>
          <html xmlns="http://www.w3.org/1999/xhtml"><p>FORMULA: C10H12N2O2</p></html>
        </notes>
      </species>
      <species id="M_bmnmsh_c" name="bimane-conjugated-mycothiol-mtb" compartment="C_c">
        <notes>
          <html xmlns="http://www.w3.org/1999/xhtml"><p>FORMULA: C27H40N4O14S</p></html>
        </notes>
      </species>
      <species id="M_btamp_c" name="Biotinyl-5-AMP" compartment="C_c">
        <notes>
          <html xmlns="http://www.w3.org/1999/xhtml"><p>FORMULA: C20H27N7O9PS</p></html>
        </notes>
      </species>
      <species id="M_btn_c" name="Biotin" compartment="C_c">
        <notes>
          <html xmlns="http://www.w3.org/1999/xhtml"><p>FORMULA: C10H15N2O3S</p></html>
        </notes>
      </species>
      <species id="M_ca2_c" name="Calcium" compartment="C_c">
        <notes>
          <html xmlns="http://www.w3.org/1999/xhtml"><p>FORMULA: Ca</p></html>
        </notes>
      </species>
      <species id="M_ca2_e" name="Calcium" compartment="C_e">
        <notes>
          <html xmlns="http://www.w3.org/1999/xhtml"><p>FORMULA: Ca</p></html>
        </notes>
      </species>
      <species id="M_camp_c" name="cAMP" compartment="C_c">
        <notes>
          <html xmlns="http://www.w3.org/1999/xhtml"><p>FORMULA: C10H11N5O6P</p></html>
        </notes>
      </species>
      <species id="M_cbasp_c" name="N-Carbamoyl-L-aspartate" compartment="C_c">
        <notes>
          <html xmlns="http://www.w3.org/1999/xhtml"><p>FORMULA: C5H6N2O5</p></html>
        </notes>
      </species>
      <species id="M_cbi_c" name="Cobinamide" compartment="C_c">
        <notes>
          <html xmlns="http://www.w3.org/1999/xhtml"><p>FORMULA: C48H72CoN11O8</p></html>
        </notes>
      </species>
      <species id="M_cbl1_c" name="Cob-I-alamin" compartment="C_c">
        <notes>
          <html xmlns="http://www.w3.org/1999/xhtml"><p>FORMULA: C62H88CoN13O14P</p></html>
        </notes>
      </species>
      <species id="M_cbp_c" name="Carbamoyl-phosphate" compartment="C_c">
        <notes>
          <html xmlns="http://www.w3.org/1999/xhtml"><p>FORMULA: CH2NO5P</p></html>
        </notes>
      </species>
      <species id="M_cdp_c" name="CDP" compartment="C_c">
        <notes>
          <html xmlns="http://www.w3.org/1999/xhtml"><p>FORMULA: C9H12N3O11P2</p></html>
        </notes>
      </species>
      <species id="M_cdpc16c19g_c" name="cdp-diacylglycerol-C160-C190" compartment="C_c">
        <notes>
          <html xmlns="http://www.w3.org/1999/xhtml"><p>FORMULA: C47H85N3O15P2</p></html>
        </notes>
      </species>
      <species id="M_cdpc19c19g_c" name="cdp-diacylglycerol-C190-C190" compartment="C_c">
        <notes>
          <html xmlns="http://www.w3.org/1999/xhtml"><p>FORMULA: C50H91N3O15P2</p></html>
        </notes>
      </species>
      <species id="M_cdpdhdecg_c" name="CDP-1-2-dihexadecanoylglycerol" compartment="C_c">
        <notes>
          <html xmlns="http://www.w3.org/1999/xhtml"><p>FORMULA: C44H79N3O15P2</p></html>
        </notes>
      </species>
      <species id="M_cdpdodecg_c" name="CDP-1-2-dioctadecanoylglycerol" compartment="C_c">
        <notes>
          <html xmlns="http://www.w3.org/1999/xhtml"><p>FORMULA: C48H87N3O15P2</p></html>
        </notes>
      </species>
      <species id="M_cgly_c" name="Cys-Gly" compartment="C_c">
        <notes>
          <html xmlns="http://www.w3.org/1999/xhtml"><p>FORMULA: C5H10N2O3S</p></html>
        </notes>
      </species>
      <species id="M_chexccoa_c" name="carboxy-hexacosanoyl-CoA" compartment="C_c">
        <notes>
          <html xmlns="http://www.w3.org/1999/xhtml"><p>FORMULA: C48H81N7O18P3S</p></html>
        </notes>
      </species>
      <species id="M_chol_c" name="Choline" compartment="C_c">
        <notes>
          <html xmlns="http://www.w3.org/1999/xhtml"><p>FORMULA: C5H14NO</p></html>
        </notes>
      </species>
      <species id="M_chol_e" name="Choline" compartment="C_e">
        <notes>
          <html xmlns="http://www.w3.org/1999/xhtml"><p>FORMULA: C5H14NO</p></html>
        </notes>
      </species>
      <species id="M_chor_c" name="chorismate" compartment="C_c">
        <notes>
          <html xmlns="http://www.w3.org/1999/xhtml"><p>FORMULA: C10H8O6</p></html>
        </notes>
      </species>
      <species id="M_cigam_c" name="cys-1D-myo-inositol-2-deoxy-D-glucopyranoside" compartment="C_c">
        <notes>
          <html xmlns="http://www.w3.org/1999/xhtml"><p>FORMULA: C15H28N2O11S</p></html>
        </notes>
      </species>
      <species id="M_cit_c" name="Citrate" compartment="C_c">
        <notes>
          <html xmlns="http://www.w3.org/1999/xhtml"><p>FORMULA: C6H5O7</p></html>
        </notes>
      </species>
      <species id="M_cit_e" name="Citrate" compartment="C_e">
        <notes>
          <html xmlns="http://www.w3.org/1999/xhtml"><p>FORMULA: C6H5O7</p></html>
        </notes>
      </species>
      <species id="M_citr_L_c" name="L-Citrulline" compartment="C_c">
        <notes>
          <html xmlns="http://www.w3.org/1999/xhtml"><p>FORMULA: C6H13N3O3</p></html>
        </notes>
      </species>
      <species id="M_cl_c" name="Chloride" compartment="C_c">
        <notes>
          <html xmlns="http://www.w3.org/1999/xhtml"><p>FORMULA: Cl</p></html>
        </notes>
      </species>
      <species id="M_cl_e" name="Chloride" compartment="C_e">
        <notes>
          <html xmlns="http://www.w3.org/1999/xhtml"><p>FORMULA: Cl</p></html>
        </notes>
      </species>
      <species id="M_clpn160190_c" name="cardiolipin-dihexadecanoyl-dimethylstearoyl" compartment="C_c">
        <notes>
          <html xmlns="http://www.w3.org/1999/xhtml"><p>FORMULA: C79H152O17P2</p></html>
        </notes>
      </species>
      <species id="M_cmcbtt_c" name="carboxymycobactin-T-R8-carbon-final-carbon-is-carboxyl-group" compartment="C_c">
        <notes>
          <html xmlns="http://www.w3.org/1999/xhtml"><p>FORMULA: C33H48N5O13</p></html>
        </notes>
      </species>
      <species id="M_cmp_c" name="CMP" compartment="C_c">
        <notes>
          <html xmlns="http://www.w3.org/1999/xhtml"><p>FORMULA: C9H12N3O8P</p></html>
        </notes>
      </species>
      <species id="M_co1dam_c" name="Cob-I-yrinate-a-c-diamide" compartment="C_c">
        <notes>
          <html xmlns="http://www.w3.org/1999/xhtml"><p>FORMULA: C45H56CoN6O12</p></html>
        </notes>
      </species>
      <species id="M_co2_c" name="CO2" compartment="C_c">
        <notes>
          <html xmlns="http://www.w3.org/1999/xhtml"><p>FORMULA: CO2</p></html>
        </notes>
      </species>
      <species id="M_co2_e" name="CO2" compartment="C_e">
        <notes>
          <html xmlns="http://www.w3.org/1999/xhtml"><p>FORMULA: CO2</p></html>
        </notes>
      </species>
      <species id="M_co2dam_c" name="Cob-II-yrinate-a-c-diamide" compartment="C_c">
        <notes>
          <html xmlns="http://www.w3.org/1999/xhtml"><p>FORMULA: C45H56CoN6O12</p></html>
        </notes>
      </species>
      <species id="M_co_c" name="Carbon-monoxide" compartment="C_c">
        <notes>
          <html xmlns="http://www.w3.org/1999/xhtml"><p>FORMULA: CO</p></html>
        </notes>
      </species>
      <species id="M_co_e" name="Carbon-monoxide" compartment="C_e">
        <notes>
          <html xmlns="http://www.w3.org/1999/xhtml"><p>FORMULA: CO</p></html>
        </notes>
      </species>
      <species id="M_coa_c" name="Coenzyme-A" compartment="C_c">
        <notes>
          <html xmlns="http://www.w3.org/1999/xhtml"><p>FORMULA: C21H32N7O16P3S</p></html>
        </notes>
      </species>
      <species id="M_coa_e" name="Coenzyme-A" compartment="C_e">
        <notes>
          <html xmlns="http://www.w3.org/1999/xhtml"><p>FORMULA: C21H32N7O16P3S</p></html>
        </notes>
      </species>
      <species id="M_cobalt2_c" name="Co2" compartment="C_c">
        <notes>
          <html xmlns="http://www.w3.org/1999/xhtml"><p>FORMULA: Co</p></html>
        </notes>
      </species>
      <species id="M_cobalt2_e" name="Co2" compartment="C_e">
        <notes>
          <html xmlns="http://www.w3.org/1999/xhtml"><p>FORMULA: Co</p></html>
        </notes>
      </species>
      <species id="M_cobya_c" name="Cobyrinate" compartment="C_c">
        <notes>
          <html xmlns="http://www.w3.org/1999/xhtml"><p>FORMULA: C45H52N4O14Co</p></html>
        </notes>
      </species>
      <species id="M_codhpre6_c" name="cobalt-dihydro-precorrin-6" compartment="C_c">
        <notes>
          <html xmlns="http://www.w3.org/1999/xhtml"><p>FORMULA: C44H47N4O16Co</p></html>
        </notes>
      </species>
      <species id="M_copre2_c" name="cobalt-precorrin-2" compartment="C_c">
        <notes>
          <html xmlns="http://www.w3.org/1999/xhtml"><p>FORMULA: C42H38N4O16Co</p></html>
        </notes>
      </species>
      <species id="M_copre3_c" name="cobalt-precorrin-3" compartment="C_c">
        <notes>
          <html xmlns="http://www.w3.org/1999/xhtml"><p>FORMULA: C43H40N4O16Co</p></html>
        </notes>
      </species>
      <species id="M_copre4_c" name="cobalt-precorrin-4" compartment="C_c">
        <notes>
          <html xmlns="http://www.w3.org/1999/xhtml"><p>FORMULA: C44H43N4O16Co</p></html>
        </notes>
      </species>
      <species id="M_copre5_c" name="cobalt-precorrin-5" compartment="C_c">
        <notes>
          <html xmlns="http://www.w3.org/1999/xhtml"><p>FORMULA: C45H45N4O16Co</p></html>
        </notes>
      </species>
      <species id="M_copre6_c" name="cobalt-precorrin-6" compartment="C_c">
        <notes>
          <html xmlns="http://www.w3.org/1999/xhtml"><p>FORMULA: C44H45N4O16Co</p></html>
        </notes>
      </species>
      <species id="M_copre8_c" name="cobalt-precorrin-8" compartment="C_c">
        <notes>
          <html xmlns="http://www.w3.org/1999/xhtml"><p>FORMULA: C45H52N4O14Co</p></html>
        </notes>
      </species>
      <species id="M_cpppg1_c" name="Coproporphyrinogen-I" compartment="C_c">
        <notes>
          <html xmlns="http://www.w3.org/1999/xhtml"><p>FORMULA: C36H40N4O8</p></html>
        </notes>
      </species>
      <species id="M_cpppg3_c" name="Coproporphyrinogen-III" compartment="C_c">
        <notes>
          <html xmlns="http://www.w3.org/1999/xhtml"><p>FORMULA: C36H40N4O8</p></html>
        </notes>
      </species>
      <species id="M_crn_c" name="L-Carnitine" compartment="C_c">
        <notes>
          <html xmlns="http://www.w3.org/1999/xhtml"><p>FORMULA: C7H15NO3</p></html>
        </notes>
      </species>
      <species id="M_crn_e" name="L-Carnitine" compartment="C_e">
        <notes>
          <html xmlns="http://www.w3.org/1999/xhtml"><p>FORMULA: C7H15NO3</p></html>
        </notes>
      </species>
      <species id="M_ctp_c" name="CTP" compartment="C_c">
        <notes>
          <html xmlns="http://www.w3.org/1999/xhtml"><p>FORMULA: C9H12N3O14P3</p></html>
        </notes>
      </species>
      <species id="M_cu2_c" name="Cu2" compartment="C_c">
        <notes>
          <html xmlns="http://www.w3.org/1999/xhtml"><p>FORMULA: Cu</p></html>
        </notes>
      </species>
      <species id="M_cu2_e" name="Cu2" compartment="C_e">
        <notes>
          <html xmlns="http://www.w3.org/1999/xhtml"><p>FORMULA: Cu</p></html>
        </notes>
      </species>
      <species id="M_cyan_c" name="Hydrogen-cyanide" compartment="C_c">
        <notes>
          <html xmlns="http://www.w3.org/1999/xhtml"><p>FORMULA: CHN</p></html>
        </notes>
      </species>
      <species id="M_cys_L_c" name="L-Cysteine" compartment="C_c">
        <notes>
          <html xmlns="http://www.w3.org/1999/xhtml"><p>FORMULA: C3H7NO2S</p></html>
        </notes>
      </species>
      <species id="M_cyst_L_c" name="L-Cystathionine" compartment="C_c">
        <notes>
          <html xmlns="http://www.w3.org/1999/xhtml"><p>FORMULA: C7H14N2O4S</p></html>
        </notes>
      </species>
      <species id="M_cytd_c" name="Cytidine" compartment="C_c">
        <notes>
          <html xmlns="http://www.w3.org/1999/xhtml"><p>FORMULA: C9H13N3O5</p></html>
        </notes>
      </species>
      <species id="M_cytd_e" name="Cytidine" compartment="C_e">
        <notes>
          <html xmlns="http://www.w3.org/1999/xhtml"><p>FORMULA: C9H13N3O5</p></html>
        </notes>
      </species>
      <species id="M_dad_2_c" name="Deoxyadenosine" compartment="C_c">
        <notes>
          <html xmlns="http://www.w3.org/1999/xhtml"><p>FORMULA: C10H13N5O3</p></html>
        </notes>
      </species>
      <species id="M_dadp_c" name="dADP" compartment="C_c">
        <notes>
          <html xmlns="http://www.w3.org/1999/xhtml"><p>FORMULA: C10H12N5O9P2</p></html>
        </notes>
      </species>
      <species id="M_damp_c" name="dAMP" compartment="C_c">
        <notes>
          <html xmlns="http://www.w3.org/1999/xhtml"><p>FORMULA: C10H12N5O6P</p></html>
        </notes>
      </species>
      <species id="M_dann_c" name="7-8-Diaminononanoate" compartment="C_c">
        <notes>
          <html xmlns="http://www.w3.org/1999/xhtml"><p>FORMULA: C9H21N2O2</p></html>
        </notes>
      </species>
      <species id="M_datp_c" name="dATP" compartment="C_c">
        <notes>
          <html xmlns="http://www.w3.org/1999/xhtml"><p>FORMULA: C10H12N5O12P3</p></html>
        </notes>
      </species>
      <species id="M_db4p_c" name="3-4-dihydroxy-2-butanone-4-phosphate" compartment="C_c">
        <notes>
          <html xmlns="http://www.w3.org/1999/xhtml"><p>FORMULA: C4H7O6P</p></html>
        </notes>
      </species>
      <species id="M_dca_c" name="Decanoate-n-C100" compartment="C_c">
        <notes>
          <html xmlns="http://www.w3.org/1999/xhtml"><p>FORMULA: C10H19O2</p></html>
        </notes>
      </species>
      <species id="M_dcamp_c" name="N6-1-2-Dicarboxyethyl-AMP" compartment="C_c">
        <notes>
          <html xmlns="http://www.w3.org/1999/xhtml"><p>FORMULA: C14H14N5O11P</p></html>
        </notes>
      </species>
      <species id="M_dcdp_c" name="dCDP" compartment="C_c">
        <notes>
          <html xmlns="http://www.w3.org/1999/xhtml"><p>FORMULA: C9H12N3O10P2</p></html>
        </notes>
      </species>
      <species id="M_dcmp_c" name="dCMP" compartment="C_c">
        <notes>
          <html xmlns="http://www.w3.org/1999/xhtml"><p>FORMULA: C9H12N3O7P</p></html>
        </notes>
      </species>
      <species id="M_dctp_c" name="dCTP" compartment="C_c">
        <notes>
          <html xmlns="http://www.w3.org/1999/xhtml"><p>FORMULA: C9H12N3O13P3</p></html>
        </notes>
      </species>
      <species id="M_dcyt_c" name="Deoxycytidine" compartment="C_c">
        <notes>
          <html xmlns="http://www.w3.org/1999/xhtml"><p>FORMULA: C9H13N3O4</p></html>
        </notes>
      </species>
      <species id="M_ddca_c" name="Dodecanoate-n-C120" compartment="C_c">
        <notes>
          <html xmlns="http://www.w3.org/1999/xhtml"><p>FORMULA: C12H23O2</p></html>
        </notes>
      </species>
      <species id="M_decd_tb_c" name="E-E-E-E-E-E-E-Z-Z-decaprenyl-phosphate" compartment="C_c">
        <notes>
          <html xmlns="http://www.w3.org/1999/xhtml"><p>FORMULA: C50H81O4P</p></html>
        </notes>
      </species>
      <species id="M_decda_tb_c" name="decaprenylphosphoryl-beta-D-arabinofuranose" compartment="C_c">
        <notes>
          <html xmlns="http://www.w3.org/1999/xhtml"><p>FORMULA: C55H89O8P</p></html>
        </notes>
      </species>
      <species id="M_decdman1p_tb_c" name="E-E-E-E-E-E-E-Z-Z-decaprenyl-mannose-phosphate" compartment="C_c">
        <notes>
          <html xmlns="http://www.w3.org/1999/xhtml"><p>FORMULA: C56H92O9P</p></html>
        </notes>
      </species>
      <species id="M_decdp_c" name="all-trans-Decaprenyl-diphosphate" compartment="C_c">
        <notes>
          <html xmlns="http://www.w3.org/1999/xhtml"><p>FORMULA: C50H81O7P2</p></html>
        </notes>
      </species>
      <species id="M_decdp_tb_c" name="E-E-E-E-E-E-E-Z-Z-Decaprenyl-diphosphate" compartment="C_c">
        <notes>
          <html xmlns="http://www.w3.org/1999/xhtml"><p>FORMULA: C50H81O7P2</p></html>
        </notes>
      </species>
      <species id="M_decdpa_tb_c" name="decaprenylphosphoryl-beta-D-5-phosphoarabinofuranose" compartment="C_c">
        <notes>
          <html xmlns="http://www.w3.org/1999/xhtml"><p>FORMULA: C55H88O11P2</p></html>
        </notes>
      </species>
      <species id="M_decdpr_tb_c" name="decaprenylphosphoryl-beta-D-5-phosphoribose" compartment="C_c">
        <notes>
          <html xmlns="http://www.w3.org/1999/xhtml"><p>FORMULA: C55H88O11P2</p></html>
        </notes>
      </species>
      <species id="M_decdr_tb_c" name="decaprenylphosphoryl-beta-D-5-ribose" compartment="C_c">
        <notes>
          <html xmlns="http://www.w3.org/1999/xhtml"><p>FORMULA: C55H89O8P</p></html>
        </notes>
      </species>
      <species id="M_dgdp_c" name="dGDP" compartment="C_c">
        <notes>
          <html xmlns="http://www.w3.org/1999/xhtml"><p>FORMULA: C10H12N5O10P2</p></html>
        </notes>
      </species>
      <species id="M_dgmp_c" name="dGMP" compartment="C_c">
        <notes>
          <html xmlns="http://www.w3.org/1999/xhtml"><p>FORMULA: C10H12N5O7P</p></html>
        </notes>
      </species>
      <species id="M_dgsn_c" name="Deoxyguanosine" compartment="C_c">
        <notes>
          <html xmlns="http://www.w3.org/1999/xhtml"><p>FORMULA: C10H13N5O4</p></html>
        </notes>
      </species>
      <species id="M_dgtp_c" name="dGTP" compartment="C_c">
        <notes>
          <html xmlns="http://www.w3.org/1999/xhtml"><p>FORMULA: C10H12N5O13P3</p></html>
        </notes>
      </species>
      <species id="M_dhap_c" name="Dihydroxyacetone-phosphate" compartment="C_c">
        <notes>
          <html xmlns="http://www.w3.org/1999/xhtml"><p>FORMULA: C3H5O6P</p></html>
        </notes>
      </species>
      <species id="M_dhf_c" name="7-8-Dihydrofolate" compartment="C_c">
        <notes>
          <html xmlns="http://www.w3.org/1999/xhtml"><p>FORMULA: C19H19N7O6</p></html>
        </notes>
      </species>
      <species id="M_dhlam_c" name="Dihydrolipoamide" compartment="C_c">
        <notes>
          <html xmlns="http://www.w3.org/1999/xhtml"><p>FORMULA: C8H17NOS2</p></html>
        </notes>
      </species>
      <species id="M_dhlpro_c" name="Dihydrolipolprotein" compartment="C_c">
        <notes>
          <html xmlns="http://www.w3.org/1999/xhtml"><p>FORMULA: H2S2X</p></html>
        </notes>
      </species>
      <species id="M_dhna_c" name="1-4-Dihydroxy-2-naphthoate" compartment="C_c">
        <notes>
          <html xmlns="http://www.w3.org/1999/xhtml"><p>FORMULA: C11H7O4</p></html>
        </notes>
      </species>
      <species id="M_dhnpt_c" name="Dihydroneopterin" compartment="C_c">
        <notes>
          <html xmlns="http://www.w3.org/1999/xhtml"><p>FORMULA: C9H13N5O4</p></html>
        </notes>
      </species>
      <species id="M_dhor_S_c" name="S-Dihydroorotate" compartment="C_c">
        <notes>
          <html xmlns="http://www.w3.org/1999/xhtml"><p>FORMULA: C5H5N2O4</p></html>
        </notes>
      </species>
      <species id="M_dhpmp_c" name="Dihydroneopterin-monophosphate" compartment="C_c">
        <notes>
          <html xmlns="http://www.w3.org/1999/xhtml"><p>FORMULA: C9H12N5O7P</p></html>
        </notes>
      </species>
      <species id="M_dhpt_c" name="Dihydropteroate" compartment="C_c">
        <notes>
          <html xmlns="http://www.w3.org/1999/xhtml"><p>FORMULA: C14H13N6O3</p></html>
        </notes>
      </species>
      <species id="M_din_c" name="Deoxyinosine" compartment="C_c">
        <notes>
          <html xmlns="http://www.w3.org/1999/xhtml"><p>FORMULA: C10H12N4O4</p></html>
        </notes>
      </species>
      <species id="M_dmarach_c" name="di-methyl-arachic-acid" compartment="C_c">
        <notes>
          <html xmlns="http://www.w3.org/1999/xhtml"><p>FORMULA: C22H43O2</p></html>
        </notes>
      </species>
      <species id="M_dmbhn_c" name="di-methyl-behenic-acid" compartment="C_c">
        <notes>
          <html xmlns="http://www.w3.org/1999/xhtml"><p>FORMULA: C24H47O2</p></html>
        </notes>
      </species>
      <species id="M_dmbzid_c" name="5-6-Dimethylbenzimidazole" compartment="C_c">
        <notes>
          <html xmlns="http://www.w3.org/1999/xhtml"><p>FORMULA: C9H10N2</p></html>
        </notes>
      </species>
      <species id="M_dmlgnc_c" name="dimethyl-lignoceric-acid" compartment="C_c">
        <notes>
          <html xmlns="http://www.w3.org/1999/xhtml"><p>FORMULA: C26H51O2</p></html>
        </notes>
      </species>
      <species id="M_dmlz_c" name="6-7-Dimethyl-8-1-D-ribityl-lumazine" compartment="C_c">
        <notes>
          <html xmlns="http://www.w3.org/1999/xhtml"><p>FORMULA: C13H18N4O6</p></html>
        </notes>
      </species>
      <species id="M_dmpp_c" name="Dimethylallyl-diphosphate" compartment="C_c">
        <notes>
          <html xmlns="http://www.w3.org/1999/xhtml"><p>FORMULA: C5H9O7P2</p></html>
        </notes>
      </species>
      <species id="M_dnad_c" name="Deamino-NAD" compartment="C_c">
        <notes>
          <html xmlns="http://www.w3.org/1999/xhtml"><p>FORMULA: C21H24N6O15P2</p></html>
        </notes>
      </species>
      <species id="M_dpcoa_c" name="Dephospho-CoA" compartment="C_c">
        <notes>
          <html xmlns="http://www.w3.org/1999/xhtml"><p>FORMULA: C21H33N7O13P2S</p></html>
        </notes>
      </species>
      <species id="M_dscl_c" name="dihydrosirohydrochlorin" compartment="C_c">
        <notes>
          <html xmlns="http://www.w3.org/1999/xhtml"><p>FORMULA: C42H41N4O16</p></html>
        </notes>
      </species>
      <species id="M_dtbt_c" name="Dethiobiotin" compartment="C_c">
        <notes>
          <html xmlns="http://www.w3.org/1999/xhtml"><p>FORMULA: C10H17N2O3</p></html>
        </notes>
      </species>
      <species id="M_dtdp4d6dg_c" name="dTDP-4-dehydro-6-deoxy-D-glucose" compartment="C_c">
        <notes>
          <html xmlns="http://www.w3.org/1999/xhtml"><p>FORMULA: C16H22N2O15P2</p></html>
        </notes>
      </species>
      <species id="M_dtdp4d6dm_c" name="dTDP-4-dehydro-6-deoxy-L-mannose" compartment="C_c">
        <notes>
          <html xmlns="http://www.w3.org/1999/xhtml"><p>FORMULA: C16H22N2O15P2</p></html>
        </notes>
      </species>
      <species id="M_dtdp_c" name="dTDP" compartment="C_c">
        <notes>
          <html xmlns="http://www.w3.org/1999/xhtml"><p>FORMULA: C10H13N2O11P2</p></html>
        </notes>
      </species>
      <species id="M_dtdpglu_c" name="dTDPglucose" compartment="C_c">
        <notes>
          <html xmlns="http://www.w3.org/1999/xhtml"><p>FORMULA: C16H24N2O16P2</p></html>
        </notes>
      </species>
      <species id="M_dtdprmn_c" name="dTDP-L-rhamnose" compartment="C_c">
        <notes>
          <html xmlns="http://www.w3.org/1999/xhtml"><p>FORMULA: C16H24N2O15P2</p></html>
        </notes>
      </species>
      <species id="M_dtmp_c" name="dTMP" compartment="C_c">
        <notes>
          <html xmlns="http://www.w3.org/1999/xhtml"><p>FORMULA: C10H13N2O8P</p></html>
        </notes>
      </species>
      <species id="M_dttOX_c" name="Oxidized-dithiothreitol" compartment="C_c">
        <notes>
          <html xmlns="http://www.w3.org/1999/xhtml"><p>FORMULA: C4H8O2S2</p></html>
        </notes>
      </species>
      <species id="M_dtt_c" name="Dithiothreitol" compartment="C_c">
        <notes>
          <html xmlns="http://www.w3.org/1999/xhtml"><p>FORMULA: C4H10O2S2</p></html>
        </notes>
      </species>
      <species id="M_dttp_c" name="dTTP" compartment="C_c">
        <notes>
          <html xmlns="http://www.w3.org/1999/xhtml"><p>FORMULA: C10H13N2O14P3</p></html>
        </notes>
      </species>
      <species id="M_dudp_c" name="dUDP" compartment="C_c">
        <notes>
          <html xmlns="http://www.w3.org/1999/xhtml"><p>FORMULA: C9H11N2O11P2</p></html>
        </notes>
      </species>
      <species id="M_dump_c" name="dUMP" compartment="C_c">
        <notes>
          <html xmlns="http://www.w3.org/1999/xhtml"><p>FORMULA: C9H11N2O8P</p></html>
        </notes>
      </species>
      <species id="M_duri_c" name="Deoxyuridine" compartment="C_c">
        <notes>
          <html xmlns="http://www.w3.org/1999/xhtml"><p>FORMULA: C9H12N2O5</p></html>
        </notes>
      </species>
      <species id="M_dutp_c" name="dUTP" compartment="C_c">
        <notes>
          <html xmlns="http://www.w3.org/1999/xhtml"><p>FORMULA: C9H11N2O14P3</p></html>
        </notes>
      </species>
      <species id="M_dxyl5p_c" name="1-deoxy-D-xylulose-5-phosphate" compartment="C_c">
        <notes>
          <html xmlns="http://www.w3.org/1999/xhtml"><p>FORMULA: C5H9O7P</p></html>
        </notes>
      </species>
      <species id="M_dxyl_c" name="1-deoxy-D-xylulose" compartment="C_c">
        <notes>
          <html xmlns="http://www.w3.org/1999/xhtml"><p>FORMULA: C5H10O4</p></html>
        </notes>
      </species>
      <species id="M_e4p_c" name="D-Erythrose-4-phosphate" compartment="C_c">
        <notes>
          <html xmlns="http://www.w3.org/1999/xhtml"><p>FORMULA: C4H7O7P</p></html>
        </notes>
      </species>
      <species id="M_eig3p_c" name="D-erythro-1-Imidazol-4-yl-glycerol-3-phosphate" compartment="C_c">
        <notes>
          <html xmlns="http://www.w3.org/1999/xhtml"><p>FORMULA: C6H9N2O6P</p></html>
        </notes>
      </species>
      <species id="M_enter_c" name="Enterochelin" compartment="C_c">
        <notes>
          <html xmlns="http://www.w3.org/1999/xhtml"><p>FORMULA: C30H27N3O15</p></html>
        </notes>
      </species>
      <species id="M_etha_c" name="Ethanolamine" compartment="C_c">
        <notes>
          <html xmlns="http://www.w3.org/1999/xhtml"><p>FORMULA: C2H8NO</p></html>
        </notes>
      </species>
      <species id="M_etha_e" name="Ethanolamine" compartment="C_e">
        <notes>
          <html xmlns="http://www.w3.org/1999/xhtml"><p>FORMULA: C2H8NO</p></html>
        </notes>
      </species>
      <species id="M_f6p_c" name="D-Fructose-6-phosphate" compartment="C_c">
        <notes>
          <html xmlns="http://www.w3.org/1999/xhtml"><p>FORMULA: C6H11O9P</p></html>
        </notes>
      </species>
      <species id="M_fad_c" name="Flavin-adenine-dinucleotide-oxidized" compartment="C_c">
        <notes>
          <html xmlns="http://www.w3.org/1999/xhtml"><p>FORMULA: C27H31N9O15P2</p></html>
        </notes>
      </species>
      <species id="M_fadh2_c" name="Flavin-adenine-dinucleotide-reduced" compartment="C_c">
        <notes>
          <html xmlns="http://www.w3.org/1999/xhtml"><p>FORMULA: C27H33N9O15P2</p></html>
        </notes>
      </species>
      <species id="M_fald_c" name="Formaldehyde" compartment="C_c">
        <notes>
          <html xmlns="http://www.w3.org/1999/xhtml"><p>FORMULA: CH2O</p></html>
        </notes>
      </species>
      <species id="M_fc1p_c" name="L-Fuculose-1-phosphate" compartment="C_c">
        <notes>
          <html xmlns="http://www.w3.org/1999/xhtml"><p>FORMULA: C6H11O8P</p></html>
        </notes>
      </species>
      <species id="M_fcmcbtt_c" name="iron-III-chelated-carboxymycobactin-T-R8-carbon-final-carbon-is-carboxyl-group" compartment="C_c">
        <notes>
          <html xmlns="http://www.w3.org/1999/xhtml"><p>FORMULA: C33H48N5O13Fe</p></html>
        </notes>
      </species>
      <species id="M_fdox_c" name="ferredoxin-oxidized-24Fe-4S" compartment="C_c">
        <notes>
          <html xmlns="http://www.w3.org/1999/xhtml"><p>FORMULA: Fe8S8X</p></html>
        </notes>
      </species>
      <species id="M_fdp_c" name="D-Fructose-1-6-bisphosphate" compartment="C_c">
        <notes>
          <html xmlns="http://www.w3.org/1999/xhtml"><p>FORMULA: C6H10O12P2</p></html>
        </notes>
      </species>
      <species id="M_fdred_c" name="ferredoxin-reduced-24Fe-4S" compartment="C_c">
        <notes>
          <html xmlns="http://www.w3.org/1999/xhtml"><p>FORMULA: Fe8S8X</p></html>
        </notes>
      </species>
      <species id="M_fdxox_c" name="Oxidized-ferredoxin" compartment="C_c">
        <notes>
          <html xmlns="http://www.w3.org/1999/xhtml"><p>FORMULA: X</p></html>
        </notes>
      </species>
      <species id="M_fdxrd_c" name="Reduced-ferredoxin" compartment="C_c">
        <notes>
          <html xmlns="http://www.w3.org/1999/xhtml"><p>FORMULA: XH2</p></html>
        </notes>
      </species>
      <species id="M_fe2_c" name="Fe2" compartment="C_c">
        <notes>
          <html xmlns="http://www.w3.org/1999/xhtml"><p>FORMULA: Fe</p></html>
        </notes>
      </species>
      <species id="M_fe2_e" name="Fe2" compartment="C_e">
        <notes>
          <html xmlns="http://www.w3.org/1999/xhtml"><p>FORMULA: Fe</p></html>
        </notes>
      </species>
      <species id="M_fe3_c" name="Fe3" compartment="C_c">
        <notes>
          <html xmlns="http://www.w3.org/1999/xhtml"><p>FORMULA: Fe</p></html>
        </notes>
      </species>
      <species id="M_fe3_e" name="Fe3" compartment="C_e">
        <notes>
          <html xmlns="http://www.w3.org/1999/xhtml"><p>FORMULA: Fe</p></html>
        </notes>
      </species>
      <species id="M_fgam_c" name="N2-Formyl-N1-5-phospho-D-ribosyl-glycinamide" compartment="C_c">
        <notes>
          <html xmlns="http://www.w3.org/1999/xhtml"><p>FORMULA: C8H13N2O9P</p></html>
        </notes>
      </species>
      <species id="M_ficytc_c" name="Ferricytochrome-c" compartment="C_c">
        <notes>
          <html xmlns="http://www.w3.org/1999/xhtml"><p>FORMULA: C42H52FeN8O6S2</p></html>
        </notes>
      </species>
      <species id="M_fmcbtt_c" name="Iron-II-mycobactin-T" compartment="C_c">
        <notes>
          <html xmlns="http://www.w3.org/1999/xhtml"><p>FORMULA: C43H71N5O10Fe</p></html>
        </notes>
      </species>
      <species id="M_fmettrna_c" name="N-Formylmethionyl-tRNA" compartment="C_c">
        <notes>
          <html xmlns="http://www.w3.org/1999/xhtml"><p>FORMULA: C6H9NO2SR</p></html>
        </notes>
      </species>
      <species id="M_fmn_c" name="FMN" compartment="C_c">
        <notes>
          <html xmlns="http://www.w3.org/1999/xhtml"><p>FORMULA: C17H19N4O9P</p></html>
        </notes>
      </species>
      <species id="M_focytc_c" name="Ferrocytochrome-c" compartment="C_c">
        <notes>
          <html xmlns="http://www.w3.org/1999/xhtml"><p>FORMULA: C42H53FeN8O6S2</p></html>
        </notes>
      </species>
      <species id="M_fol_c" name="Folate" compartment="C_c">
        <notes>
          <html xmlns="http://www.w3.org/1999/xhtml"><p>FORMULA: C19H18N7O6</p></html>
        </notes>
      </species>
      <species id="M_for_c" name="Formate" compartment="C_c">
        <notes>
          <html xmlns="http://www.w3.org/1999/xhtml"><p>FORMULA: CH1O2</p></html>
        </notes>
      </species>
      <species id="M_forcoa_c" name="Formyl-CoA" compartment="C_c">
        <notes>
          <html xmlns="http://www.w3.org/1999/xhtml"><p>FORMULA: C22H32N7O17P3S</p></html>
        </notes>
      </species>
      <species id="M_fpram_c" name="2-Formamido-N1-5-phospho-D-ribosyl-acetamidine" compartment="C_c">
        <notes>
          <html xmlns="http://www.w3.org/1999/xhtml"><p>FORMULA: C8H15N3O8P</p></html>
        </notes>
      </species>
      <species id="M_fprica_c" name="5-Formamido-1-5-phospho-D-ribosyl-imidazole-4-carboxamide" compartment="C_c">
        <notes>
          <html xmlns="http://www.w3.org/1999/xhtml"><p>FORMULA: C10H13N4O9P</p></html>
        </notes>
      </species>
      <species id="M_frdp_c" name="Farnesyl-diphosphate" compartment="C_c">
        <notes>
          <html xmlns="http://www.w3.org/1999/xhtml"><p>FORMULA: C15H25O7P2</p></html>
        </notes>
      </species>
      <species id="M_frrppdima_c" name="fucose-rhamnose-rhamnose-phenol-phthiocerol-dimycocerosate-Mtb" compartment="C_c">
        <notes>
          <html xmlns="http://www.w3.org/1999/xhtml"><p>FORMULA: C117H218O18</p></html>
        </notes>
      </species>
      <species id="M_fum_c" name="Fumarate" compartment="C_c">
        <notes>
          <html xmlns="http://www.w3.org/1999/xhtml"><p>FORMULA: C4H2O4</p></html>
        </notes>
      </species>
      <species id="M_fum_e" name="Fumarate" compartment="C_e">
        <notes>
          <html xmlns="http://www.w3.org/1999/xhtml"><p>FORMULA: C4H2O4</p></html>
        </notes>
      </species>
      <species id="M_g1p_c" name="D-Glucose-1-phosphate" compartment="C_c">
        <notes>
          <html xmlns="http://www.w3.org/1999/xhtml"><p>FORMULA: C6H11O9P</p></html>
        </notes>
      </species>
      <species id="M_g3p_c" name="Glyceraldehyde-3-phosphate" compartment="C_c">
        <notes>
          <html xmlns="http://www.w3.org/1999/xhtml"><p>FORMULA: C3H5O6P</p></html>
        </notes>
      </species>
      <species id="M_g3pe_c" name="sn-Glycero-3-phosphoethanolamine" compartment="C_c">
        <notes>
          <html xmlns="http://www.w3.org/1999/xhtml"><p>FORMULA: C5H14NO6P</p></html>
        </notes>
      </species>
      <species id="M_g6p_c" name="D-Glucose-6-phosphate" compartment="C_c">
        <notes>
          <html xmlns="http://www.w3.org/1999/xhtml"><p>FORMULA: C6H11O9P</p></html>
        </notes>
      </species>
      <species id="M_gal1p_c" name="alpha-D-Galactose-1-phosphate" compartment="C_c">
        <notes>
          <html xmlns="http://www.w3.org/1999/xhtml"><p>FORMULA: C6H11O9P</p></html>
        </notes>
      </species>
      <species id="M_gal_c" name="D-Galactose" compartment="C_c">
        <notes>
          <html xmlns="http://www.w3.org/1999/xhtml"><p>FORMULA: C6H12O6</p></html>
        </notes>
      </species>
      <species id="M_gal_e" name="D-Galactose" compartment="C_e">
        <notes>
          <html xmlns="http://www.w3.org/1999/xhtml"><p>FORMULA: C6H12O6</p></html>
        </notes>
      </species>
      <species id="M_galfragund_c" name="galactofuranosyl-30-rhamanosyl-N-acetylglucosamyl-undecaprenyl-diphosphate-M-tb" compartment="C_c">
        <notes>
          <html xmlns="http://www.w3.org/1999/xhtml"><p>FORMULA: C249H415NO167P2</p></html>
        </notes>
      </species>
      <species id="M_gam1p_c" name="D-Glucosamine-1-phosphate" compartment="C_c">
        <notes>
          <html xmlns="http://www.w3.org/1999/xhtml"><p>FORMULA: C6H13NO8P</p></html>
        </notes>
      </species>
      <species id="M_gam6p_c" name="D-Glucosamine-6-phosphate" compartment="C_c">
        <notes>
          <html xmlns="http://www.w3.org/1999/xhtml"><p>FORMULA: C6H13NO8P</p></html>
        </notes>
      </species>
      <species id="M_gar_c" name="N1-5-Phospho-D-ribosyl-glycinamide" compartment="C_c">
        <notes>
          <html xmlns="http://www.w3.org/1999/xhtml"><p>FORMULA: C7H14N2O8P</p></html>
        </notes>
      </species>
      <species id="M_gcald_c" name="Glycolaldehyde" compartment="C_c">
        <notes>
          <html xmlns="http://www.w3.org/1999/xhtml"><p>FORMULA: C2H4O2</p></html>
        </notes>
      </species>
      <species id="M_gcald_e" name="Glycolaldehyde" compartment="C_e">
        <notes>
          <html xmlns="http://www.w3.org/1999/xhtml"><p>FORMULA: C2H4O2</p></html>
        </notes>
      </species>
      <species id="M_gdp_c" name="GDP" compartment="C_c">
        <notes>
          <html xmlns="http://www.w3.org/1999/xhtml"><p>FORMULA: C10H12N5O11P2</p></html>
        </notes>
      </species>
      <species id="M_gdpddman_c" name="GDP-4-dehydro-6-deoxy-D-mannose" compartment="C_c">
        <notes>
          <html xmlns="http://www.w3.org/1999/xhtml"><p>FORMULA: C16H21N5O15P2</p></html>
        </notes>
      </species>
      <species id="M_gdpfuc_c" name="GDP-L-fucose" compartment="C_c">
        <notes>
          <html xmlns="http://www.w3.org/1999/xhtml"><p>FORMULA: C16H23N5O15P2</p></html>
        </notes>
      </species>
      <species id="M_gdpmann_c" name="GDP-D-mannose" compartment="C_c">
        <notes>
          <html xmlns="http://www.w3.org/1999/xhtml"><p>FORMULA: C16H23N5O16P2</p></html>
        </notes>
      </species>
      <species id="M_gdptp_c" name="Guanosine-3-diphosphate-5-triphosphate" compartment="C_c">
        <notes>
          <html xmlns="http://www.w3.org/1999/xhtml"><p>FORMULA: C10H11N5O20P5</p></html>
        </notes>
      </species>
      <species id="M_glc_D_c" name="D-Glucose" compartment="C_c">
        <notes>
          <html xmlns="http://www.w3.org/1999/xhtml"><p>FORMULA: C6H12O6</p></html>
        </notes>
      </species>
      <species id="M_glc_D_e" name="D-Glucose" compartment="C_e">
        <notes>
          <html xmlns="http://www.w3.org/1999/xhtml"><p>FORMULA: C6H12O6</p></html>
        </notes>
      </species>
      <species id="M_glcn_c" name="D-Gluconate" compartment="C_c">
        <notes>
          <html xmlns="http://www.w3.org/1999/xhtml"><p>FORMULA: C6H11O7</p></html>
        </notes>
      </species>
      <species id="M_gln_L_c" name="L-Glutamine" compartment="C_c">
        <notes>
          <html xmlns="http://www.w3.org/1999/xhtml"><p>FORMULA: C5H10N2O3</p></html>
        </notes>
      </species>
      <species id="M_glu1sa_c" name="L-Glutamate-1-semialdehyde" compartment="C_c">
        <notes>
          <html xmlns="http://www.w3.org/1999/xhtml"><p>FORMULA: C5H9NO3</p></html>
        </notes>
      </species>
      <species id="M_glu5p_c" name="L-Glutamate-5-phosphate" compartment="C_c">
        <notes>
          <html xmlns="http://www.w3.org/1999/xhtml"><p>FORMULA: C5H8NO7P</p></html>
        </notes>
      </species>
      <species id="M_glu5sa_c" name="L-Glutamate-5-semialdehyde" compartment="C_c">
        <notes>
          <html xmlns="http://www.w3.org/1999/xhtml"><p>FORMULA: C5H9NO3</p></html>
        </notes>
      </species>
      <species id="M_glu_D_c" name="D-Glutamate" compartment="C_c">
        <notes>
          <html xmlns="http://www.w3.org/1999/xhtml"><p>FORMULA: C5H8NO4</p></html>
        </notes>
      </species>
      <species id="M_glu_L_c" name="L-Glutamate" compartment="C_c">
        <notes>
          <html xmlns="http://www.w3.org/1999/xhtml"><p>FORMULA: C5H8NO4</p></html>
        </notes>
      </species>
      <species id="M_glu_L_e" name="L-Glutamate" compartment="C_e">
        <notes>
          <html xmlns="http://www.w3.org/1999/xhtml"><p>FORMULA: C5H8NO4</p></html>
        </notes>
      </species>
      <species id="M_gluala_c" name="5-L-Glutamyl-L-alanine" compartment="C_c">
        <notes>
          <html xmlns="http://www.w3.org/1999/xhtml"><p>FORMULA: C8H13N2O5</p></html>
        </notes>
      </species>
      <species id="M_glucys_c" name="gamma-L-Glutamyl-L-cysteine" compartment="C_c">
        <notes>
          <html xmlns="http://www.w3.org/1999/xhtml"><p>FORMULA: C8H13N2O5S</p></html>
        </notes>
      </species>
      <species id="M_glutrna_c" name="L-Glutamyl-tRNA-Glu" compartment="C_c">
        <notes>
          <html xmlns="http://www.w3.org/1999/xhtml"><p>FORMULA: C5H7NO3R</p></html>
        </notes>
      </species>
      <species id="M_glx_c" name="Glyoxylate" compartment="C_c">
        <notes>
          <html xmlns="http://www.w3.org/1999/xhtml"><p>FORMULA: C2H1O3</p></html>
        </notes>
      </species>
      <species id="M_gly_c" name="Glycine" compartment="C_c">
        <notes>
          <html xmlns="http://www.w3.org/1999/xhtml"><p>FORMULA: C2H5NO2</p></html>
        </notes>
      </species>
      <species id="M_gly_e" name="Glycine" compartment="C_e">
        <notes>
          <html xmlns="http://www.w3.org/1999/xhtml"><p>FORMULA: C2H5NO2</p></html>
        </notes>
      </species>
      <species id="M_glyb_c" name="Glycine-betaine" compartment="C_c">
        <notes>
          <html xmlns="http://www.w3.org/1999/xhtml"><p>FORMULA: C5H11NO2</p></html>
        </notes>
      </species>
      <species id="M_glyb_e" name="Glycine-betaine" compartment="C_e">
        <notes>
          <html xmlns="http://www.w3.org/1999/xhtml"><p>FORMULA: C5H11NO2</p></html>
        </notes>
      </species>
      <species id="M_glyc3p_c" name="Glycerol-3-phosphate" compartment="C_c">
        <notes>
          <html xmlns="http://www.w3.org/1999/xhtml"><p>FORMULA: C3H7O6P</p></html>
        </notes>
      </species>
      <species id="M_glyc3p_e" name="Glycerol-3-phosphate" compartment="C_e">
        <notes>
          <html xmlns="http://www.w3.org/1999/xhtml"><p>FORMULA: C3H7O6P</p></html>
        </notes>
      </species>
      <species id="M_glyc_R_c" name="R-Glycerate" compartment="C_c">
        <notes>
          <html xmlns="http://www.w3.org/1999/xhtml"><p>FORMULA: C3H5O4</p></html>
        </notes>
      </species>
      <species id="M_glyc_c" name="Glycerol" compartment="C_c">
        <notes>
          <html xmlns="http://www.w3.org/1999/xhtml"><p>FORMULA: C3H8O3</p></html>
        </notes>
      </species>
      <species id="M_glyc_e" name="Glycerol" compartment="C_e">
        <notes>
          <html xmlns="http://www.w3.org/1999/xhtml"><p>FORMULA: C3H8O3</p></html>
        </notes>
      </species>
      <species id="M_glyclt_c" name="Glycolate" compartment="C_c">
        <notes>
          <html xmlns="http://www.w3.org/1999/xhtml"><p>FORMULA: C2H3O3</p></html>
        </notes>
      </species>
      <species id="M_glycogen_c" name="glycogen" compartment="C_c">
        <notes>
          <html xmlns="http://www.w3.org/1999/xhtml"><p>FORMULA: C6H10O5</p></html>
        </notes>
      </species>
      <species id="M_gmp_c" name="GMP" compartment="C_c">
        <notes>
          <html xmlns="http://www.w3.org/1999/xhtml"><p>FORMULA: C10H12N5O8P</p></html>
        </notes>
      </species>
      <species id="M_grdp_c" name="Geranyl-diphosphate" compartment="C_c">
        <notes>
          <html xmlns="http://www.w3.org/1999/xhtml"><p>FORMULA: C10H17O7P2</p></html>
        </notes>
      </species>
      <species id="M_gsn_c" name="Guanosine" compartment="C_c">
        <notes>
          <html xmlns="http://www.w3.org/1999/xhtml"><p>FORMULA: C10H13N5O5</p></html>
        </notes>
      </species>
      <species id="M_gthox_c" name="Oxidized-glutathione" compartment="C_c">
        <notes>
          <html xmlns="http://www.w3.org/1999/xhtml"><p>FORMULA: C20H30N6O12S2</p></html>
        </notes>
      </species>
      <species id="M_gthrd_c" name="Reduced-glutathione" compartment="C_c">
        <notes>
          <html xmlns="http://www.w3.org/1999/xhtml"><p>FORMULA: C10H16N3O6S</p></html>
        </notes>
      </species>
      <species id="M_gthrd_e" name="Reduced-glutathione" compartment="C_e">
        <notes>
          <html xmlns="http://www.w3.org/1999/xhtml"><p>FORMULA: C10H16N3O6S</p></html>
        </notes>
      </species>
      <species id="M_gtp_c" name="GTP" compartment="C_c">
        <notes>
          <html xmlns="http://www.w3.org/1999/xhtml"><p>FORMULA: C10H12N5O14P3</p></html>
        </notes>
      </species>
      <species id="M_gua_c" name="Guanine" compartment="C_c">
        <notes>
          <html xmlns="http://www.w3.org/1999/xhtml"><p>FORMULA: C5H5N5O</p></html>
        </notes>
      </species>
      <species id="M_h2_c" name="H2" compartment="C_c">
        <notes>
          <html xmlns="http://www.w3.org/1999/xhtml"><p>FORMULA: H2</p></html>
        </notes>
      </species>
      <species id="M_h2_e" name="H2" compartment="C_e">
        <notes>
          <html xmlns="http://www.w3.org/1999/xhtml"><p>FORMULA: H2</p></html>
        </notes>
      </species>
      <species id="M_h2co3_c" name="carbonic-acid" compartment="C_c">
        <notes>
          <html xmlns="http://www.w3.org/1999/xhtml"><p>FORMULA: H2CO3</p></html>
        </notes>
      </species>
      <species id="M_h2co3_e" name="carbonic-acid" compartment="C_e">
        <notes>
          <html xmlns="http://www.w3.org/1999/xhtml"><p>FORMULA: H2CO3</p></html>
        </notes>
      </species>
      <species id="M_h2mb4p_c" name="1-hydroxy-2-methyl-2-E-butenyl-4-diphosphate" compartment="C_c">
        <notes>
          <html xmlns="http://www.w3.org/1999/xhtml"><p>FORMULA: C5H9O8P2</p></html>
        </notes>
      </species>
      <species id="M_h2o2_c" name="Hydrogen-peroxide" compartment="C_c">
        <notes>
          <html xmlns="http://www.w3.org/1999/xhtml"><p>FORMULA: H2O2</p></html>
        </notes>
      </species>
      <species id="M_h2o_c" name="H2O" compartment="C_c">
        <notes>
          <html xmlns="http://www.w3.org/1999/xhtml"><p>FORMULA: H2O</p></html>
        </notes>
      </species>
      <species id="M_h2o_e" name="H2O" compartment="C_e">
        <notes>
          <html xmlns="http://www.w3.org/1999/xhtml"><p>FORMULA: H2O</p></html>
        </notes>
      </species>
      <species id="M_h2s_c" name="Hydrogen-sulfide" compartment="C_c">
        <notes>
          <html xmlns="http://www.w3.org/1999/xhtml"><p>FORMULA: H2S</p></html>
        </notes>
      </species>
      <species id="M_h2s_e" name="Hydrogen-sulfide" compartment="C_e">
        <notes>
          <html xmlns="http://www.w3.org/1999/xhtml"><p>FORMULA: H2S</p></html>
        </notes>
      </species>
      <species id="M_h_c" name="H" compartment="C_c">
        <notes>
          <html xmlns="http://www.w3.org/1999/xhtml"><p>FORMULA: H</p></html>
        </notes>
      </species>
      <species id="M_h_e" name="H" compartment="C_e">
        <notes>
          <html xmlns="http://www.w3.org/1999/xhtml"><p>FORMULA: H</p></html>
        </notes>
      </species>
      <species id="M_harab_D_c" name="hexa-arabinofuranoside" compartment="C_c">
        <notes>
          <html xmlns="http://www.w3.org/1999/xhtml"><p>FORMULA: C30H50O25</p></html>
        </notes>
      </species>
      <species id="M_hco3_c" name="Bicarbonate" compartment="C_c">
        <notes>
          <html xmlns="http://www.w3.org/1999/xhtml"><p>FORMULA: CHO3</p></html>
        </notes>
      </species>
      <species id="M_hcys_L_c" name="L-Homocysteine" compartment="C_c">
        <notes>
          <html xmlns="http://www.w3.org/1999/xhtml"><p>FORMULA: C4H9NO2S</p></html>
        </notes>
      </species>
      <species id="M_hdca_c" name="Hexadecanoate-n-C160" compartment="C_c">
        <notes>
          <html xmlns="http://www.w3.org/1999/xhtml"><p>FORMULA: C16H31O2</p></html>
        </notes>
      </species>
      <species id="M_hdca_e" name="Hexadecanoate-n-C160" compartment="C_e">
        <notes>
          <html xmlns="http://www.w3.org/1999/xhtml"><p>FORMULA: C16H31O2</p></html>
        </notes>
      </species>
      <species id="M_hdcea_c" name="Hexadecenoate-n-C161" compartment="C_c">
        <notes>
          <html xmlns="http://www.w3.org/1999/xhtml"><p>FORMULA: C16H29O2</p></html>
        </notes>
      </species>
      <species id="M_hdcoa_c" name="Hexadecenoyl-CoA-n-C161CoA" compartment="C_c">
        <notes>
          <html xmlns="http://www.w3.org/1999/xhtml"><p>FORMULA: C37H60N7O17P3S</p></html>
        </notes>
      </species>
      <species id="M_hexc_c" name="hexacosanoate-n-C260" compartment="C_c">
        <notes>
          <html xmlns="http://www.w3.org/1999/xhtml"><p>FORMULA: C26H51O2</p></html>
        </notes>
      </species>
      <species id="M_hexccoa_c" name="Hexacosanoyl-CoA-n-C260CoA" compartment="C_c">
        <notes>
          <html xmlns="http://www.w3.org/1999/xhtml"><p>FORMULA: C47H82N7O17P3S</p></html>
        </notes>
      </species>
      <species id="M_hgbam_c" name="Hydrogenobyrinate-a-c-diamide" compartment="C_c">
        <notes>
          <html xmlns="http://www.w3.org/1999/xhtml"><p>FORMULA: C45H57N6O12</p></html>
        </notes>
      </species>
      <species id="M_hgbyr_c" name="Hydrogenobyrinate" compartment="C_c">
        <notes>
          <html xmlns="http://www.w3.org/1999/xhtml"><p>FORMULA: C45H54N4O14</p></html>
        </notes>
      </species>
      <species id="M_his_L_c" name="L-Histidine" compartment="C_c">
        <notes>
          <html xmlns="http://www.w3.org/1999/xhtml"><p>FORMULA: C6H9N3O2</p></html>
        </notes>
      </species>
      <species id="M_his_L_e" name="L-Histidine" compartment="C_e">
        <notes>
          <html xmlns="http://www.w3.org/1999/xhtml"><p>FORMULA: C6H9N3O2</p></html>
        </notes>
      </species>
      <species id="M_hisp_c" name="L-Histidinol-phosphate" compartment="C_c">
        <notes>
          <html xmlns="http://www.w3.org/1999/xhtml"><p>FORMULA: C6H11N3O4P</p></html>
        </notes>
      </species>
      <species id="M_histd_c" name="L-Histidinol" compartment="C_c">
        <notes>
          <html xmlns="http://www.w3.org/1999/xhtml"><p>FORMULA: C6H12N3O</p></html>
        </notes>
      </species>
      <species id="M_hmbil_c" name="Hydroxymethylbilane" compartment="C_c">
        <notes>
          <html xmlns="http://www.w3.org/1999/xhtml"><p>FORMULA: C40H38N4O17</p></html>
        </notes>
      </species>
      <species id="M_hmocta_c" name="hexa-methyl-octacosanoate" compartment="C_c">
        <notes>
          <html xmlns="http://www.w3.org/1999/xhtml"><p>FORMULA: C34H67O2</p></html>
        </notes>
      </species>
      <species id="M_hmtria_c" name="hexa-methyl-triacontanoic-acid-C300-plus-6-methyl-branches" compartment="C_c">
        <notes>
          <html xmlns="http://www.w3.org/1999/xhtml"><p>FORMULA: C36H71O2</p></html>
        </notes>
      </species>
      <species id="M_hom_L_c" name="L-Homoserine" compartment="C_c">
        <notes>
          <html xmlns="http://www.w3.org/1999/xhtml"><p>FORMULA: C4H9NO3</p></html>
        </notes>
      </species>
      <species id="M_homtta_c" name="10-hydroxy-octa-methyl-tetracontatricosanoic-acid-C340-8-methyl-branched-carbons-1-hydroxylated-carbon" compartment="C_c">
        <notes>
          <html xmlns="http://www.w3.org/1999/xhtml"><p>FORMULA: C42H83O3</p></html>
        </notes>
      </species>
      <species id="M_hpglu_c" name="Tetrahydropteroyltri-L-glutamate" compartment="C_c">
        <notes>
          <html xmlns="http://www.w3.org/1999/xhtml"><p>FORMULA: C24H34N8O12</p></html>
        </notes>
      </species>
      <species id="M_hpmdtria_c" name="hepta-methyl-dotriacontanoic-acid-7-methyl-branches" compartment="C_c">
        <notes>
          <html xmlns="http://www.w3.org/1999/xhtml"><p>FORMULA: C39H77O2</p></html>
        </notes>
      </species>
      <species id="M_hpmtria_c" name="hepta-methyl-triacontanoic-acid-C300-plus-7-methyl-branches" compartment="C_c">
        <notes>
          <html xmlns="http://www.w3.org/1999/xhtml"><p>FORMULA: C37H73O2</p></html>
        </notes>
      </species>
      <species id="M_hxan_c" name="Hypoxanthine" compartment="C_c">
        <notes>
          <html xmlns="http://www.w3.org/1999/xhtml"><p>FORMULA: C5H4N4O</p></html>
        </notes>
      </species>
      <species id="M_iacgam_c" name="1D-myo-inositol-2-Acetamido-2-deoxy-D-glucopyranoside" compartment="C_c">
        <notes>
          <html xmlns="http://www.w3.org/1999/xhtml"><p>FORMULA: C14H25NO11</p></html>
        </notes>
      </species>
      <species id="M_iasp_c" name="Iminoaspartate" compartment="C_c">
        <notes>
          <html xmlns="http://www.w3.org/1999/xhtml"><p>FORMULA: C4H3NO4</p></html>
        </notes>
      </species>
      <species id="M_ichor_c" name="Isochorismate" compartment="C_c">
        <notes>
          <html xmlns="http://www.w3.org/1999/xhtml"><p>FORMULA: C10H8O6</p></html>
        </notes>
      </species>
      <species id="M_icit_c" name="Isocitrate" compartment="C_c">
        <notes>
          <html xmlns="http://www.w3.org/1999/xhtml"><p>FORMULA: C6H5O7</p></html>
        </notes>
      </species>
      <species id="M_id3acald_c" name="Indole-3-acetaldehyde" compartment="C_c">
        <notes>
          <html xmlns="http://www.w3.org/1999/xhtml"><p>FORMULA: C10H9NO</p></html>
        </notes>
      </species>
      <species id="M_id3acald_e" name="Indole-3-acetaldehyde" compartment="C_e">
        <notes>
          <html xmlns="http://www.w3.org/1999/xhtml"><p>FORMULA: C10H9NO</p></html>
        </notes>
      </species>
      <species id="M_idp_c" name="IDP" compartment="C_c">
        <notes>
          <html xmlns="http://www.w3.org/1999/xhtml"><p>FORMULA: C10H11N4O11P2</p></html>
        </notes>
      </species>
      <species id="M_igam_c" name="1D-myo-inositol-2-deoxy-D-glucopyranoside" compartment="C_c">
        <notes>
          <html xmlns="http://www.w3.org/1999/xhtml"><p>FORMULA: C12H24NO10</p></html>
        </notes>
      </species>
      <species id="M_ile_L_c" name="L-Isoleucine" compartment="C_c">
        <notes>
          <html xmlns="http://www.w3.org/1999/xhtml"><p>FORMULA: C6H13NO2</p></html>
        </notes>
      </species>
      <species id="M_ile_L_e" name="L-Isoleucine" compartment="C_e">
        <notes>
          <html xmlns="http://www.w3.org/1999/xhtml"><p>FORMULA: C6H13NO2</p></html>
        </notes>
      </species>
      <species id="M_imacp_c" name="3-Imidazol-4-yl-2-oxopropyl-phosphate" compartment="C_c">
        <notes>
          <html xmlns="http://www.w3.org/1999/xhtml"><p>FORMULA: C6H7N2O5P</p></html>
        </notes>
      </species>
      <species id="M_imp_c" name="IMP" compartment="C_c">
        <notes>
          <html xmlns="http://www.w3.org/1999/xhtml"><p>FORMULA: C10H11N4O8P</p></html>
        </notes>
      </species>
      <species id="M_indole_c" name="Indole" compartment="C_c">
        <notes>
          <html xmlns="http://www.w3.org/1999/xhtml"><p>FORMULA: C8H7N</p></html>
        </notes>
      </species>
      <species id="M_indpyr_c" name="Indolepyruvate" compartment="C_c">
        <notes>
          <html xmlns="http://www.w3.org/1999/xhtml"><p>FORMULA: C11H8NO3</p></html>
        </notes>
      </species>
      <species id="M_inost_c" name="myo-Inositol" compartment="C_c">
        <notes>
          <html xmlns="http://www.w3.org/1999/xhtml"><p>FORMULA: C6H12O6</p></html>
        </notes>
      </species>
      <species id="M_ins_c" name="Inosine" compartment="C_c">
        <notes>
          <html xmlns="http://www.w3.org/1999/xhtml"><p>FORMULA: C10H12N4O5</p></html>
        </notes>
      </species>
      <species id="M_ipdp_c" name="Isopentenyl-diphosphate" compartment="C_c">
        <notes>
          <html xmlns="http://www.w3.org/1999/xhtml"><p>FORMULA: C5H9O7P2</p></html>
        </notes>
      </species>
      <species id="M_itp_c" name="ITP" compartment="C_c">
        <notes>
          <html xmlns="http://www.w3.org/1999/xhtml"><p>FORMULA: C10H11N4O14P3</p></html>
        </notes>
      </species>
      <species id="M_k_c" name="potassium" compartment="C_c">
        <notes>
          <html xmlns="http://www.w3.org/1999/xhtml"><p>FORMULA: K</p></html>
        </notes>
      </species>
      <species id="M_k_e" name="potassium" compartment="C_e">
        <notes>
          <html xmlns="http://www.w3.org/1999/xhtml"><p>FORMULA: K</p></html>
        </notes>
      </species>
      <species id="M_kmeroacidACP_c" name="keto-meroacid-ACP" compartment="C_c">
        <notes>
          <html xmlns="http://www.w3.org/1999/xhtml"><p>FORMULA: C69H131N2O8PRS</p></html>
        </notes>
      </species>
      <species id="M_kmeroacidcyc1ACP_c" name="cyclopropanated-keto-meroacid-ACP-1-cyclopropane-ring" compartment="C_c">
        <notes>
          <html xmlns="http://www.w3.org/1999/xhtml"><p>FORMULA: C70H133N2O8PRS</p></html>
        </notes>
      </species>
      <species id="M_kmeroacidcyc2ACP_c" name="cyclopropanated-keto-meroacid-ACP-2-cyclopropane-rings" compartment="C_c">
        <notes>
          <html xmlns="http://www.w3.org/1999/xhtml"><p>FORMULA: C71H135N2O8PRS</p></html>
        </notes>
      </species>
      <species id="M_kmeroacidcyc2AMP_c" name="cyclopropanated-keto-meroacid-AMP-2-cyclopropane-rings" compartment="C_c">
        <notes>
          <html xmlns="http://www.w3.org/1999/xhtml"><p>FORMULA: C70H127N5O8P</p></html>
        </notes>
      </species>
      <species id="M_kmycolate_c" name="keto-mycolate-2-cyclopropanated-rings" compartment="C_c">
        <notes>
          <html xmlns="http://www.w3.org/1999/xhtml"><p>FORMULA: C86H166O3</p></html>
        </notes>
      </species>
      <species id="M_lac_L_c" name="L-Lactate" compartment="C_c">
        <notes>
          <html xmlns="http://www.w3.org/1999/xhtml"><p>FORMULA: C3H5O3</p></html>
        </notes>
      </species>
      <species id="M_lac_L_e" name="L-Lactate" compartment="C_e">
        <notes>
          <html xmlns="http://www.w3.org/1999/xhtml"><p>FORMULA: C3H5O3</p></html>
        </notes>
      </species>
      <species id="M_lald_L_c" name="L-Lactaldehyde" compartment="C_c">
        <notes>
          <html xmlns="http://www.w3.org/1999/xhtml"><p>FORMULA: C3H6O2</p></html>
        </notes>
      </species>
      <species id="M_lcts_c" name="Lactose" compartment="C_c">
        <notes>
          <html xmlns="http://www.w3.org/1999/xhtml"><p>FORMULA: C12H22O11</p></html>
        </notes>
      </species>
      <species id="M_lcts_e" name="Lactose" compartment="C_e">
        <notes>
          <html xmlns="http://www.w3.org/1999/xhtml"><p>FORMULA: C12H22O11</p></html>
        </notes>
      </species>
      <species id="M_leu_L_c" name="L-Leucine" compartment="C_c">
        <notes>
          <html xmlns="http://www.w3.org/1999/xhtml"><p>FORMULA: C6H13NO2</p></html>
        </notes>
      </species>
      <species id="M_leu_L_e" name="L-Leucine" compartment="C_e">
        <notes>
          <html xmlns="http://www.w3.org/1999/xhtml"><p>FORMULA: C6H13NO2</p></html>
        </notes>
      </species>
      <species id="M_lpam_c" name="Lipoamide" compartment="C_c">
        <notes>
          <html xmlns="http://www.w3.org/1999/xhtml"><p>FORMULA: C8H15NOS2</p></html>
        </notes>
      </species>
      <species id="M_lpro_c" name="Lipoylprotein" compartment="C_c">
        <notes>
          <html xmlns="http://www.w3.org/1999/xhtml"><p>FORMULA: S2X</p></html>
        </notes>
      </species>
      <species id="M_lys_L_c" name="L-Lysine" compartment="C_c">
        <notes>
          <html xmlns="http://www.w3.org/1999/xhtml"><p>FORMULA: C6H15N2O2</p></html>
        </notes>
      </species>
      <species id="M_lys_L_e" name="L-Lysine" compartment="C_e">
        <notes>
          <html xmlns="http://www.w3.org/1999/xhtml"><p>FORMULA: C6H15N2O2</p></html>
        </notes>
      </species>
      <species id="M_m1ocdca_c" name="methyl-octadecanoate" compartment="C_c">
        <notes>
          <html xmlns="http://www.w3.org/1999/xhtml"><p>FORMULA: C19H37O2</p></html>
        </notes>
      </species>
      <species id="M_malACP_c" name="Malonyl-acyl-carrier-protein" compartment="C_c">
        <notes>
          <html xmlns="http://www.w3.org/1999/xhtml"><p>FORMULA: C14H22N2O10PRS</p></html>
        </notes>
      </species>
      <species id="M_mal_L_c" name="L-Malate" compartment="C_c">
        <notes>
          <html xmlns="http://www.w3.org/1999/xhtml"><p>FORMULA: C4H4O5</p></html>
        </notes>
      </species>
      <species id="M_mal_L_e" name="L-Malate" compartment="C_e">
        <notes>
          <html xmlns="http://www.w3.org/1999/xhtml"><p>FORMULA: C4H4O5</p></html>
        </notes>
      </species>
      <species id="M_malcoa_c" name="Malonyl-CoA" compartment="C_c">
        <notes>
          <html xmlns="http://www.w3.org/1999/xhtml"><p>FORMULA: C24H33N7O19P3S</p></html>
        </notes>
      </species>
      <species id="M_malt_c" name="Maltose" compartment="C_c">
        <notes>
          <html xmlns="http://www.w3.org/1999/xhtml"><p>FORMULA: C12H22O11</p></html>
        </notes>
      </species>
      <species id="M_malt_e" name="Maltose" compartment="C_e">
        <notes>
          <html xmlns="http://www.w3.org/1999/xhtml"><p>FORMULA: C12H22O11</p></html>
        </notes>
      </species>
      <species id="M_malthp_c" name="Maltoheptaose" compartment="C_c">
        <notes>
          <html xmlns="http://www.w3.org/1999/xhtml"><p>FORMULA: C42H72O36</p></html>
        </notes>
      </species>
      <species id="M_malthp_e" name="Maltoheptaose" compartment="C_e">
        <notes>
          <html xmlns="http://www.w3.org/1999/xhtml"><p>FORMULA: C42H72O36</p></html>
        </notes>
      </species>
      <species id="M_maltpt_c" name="Maltopentaose" compartment="C_c">
        <notes>
          <html xmlns="http://www.w3.org/1999/xhtml"><p>FORMULA: C30H52O26</p></html>
        </notes>
      </species>
      <species id="M_man1p_c" name="D-Mannose-1-phosphate" compartment="C_c">
        <notes>
          <html xmlns="http://www.w3.org/1999/xhtml"><p>FORMULA: C6H11O9P</p></html>
        </notes>
      </species>
      <species id="M_man6p_c" name="D-Mannose-6-phosphate" compartment="C_c">
        <notes>
          <html xmlns="http://www.w3.org/1999/xhtml"><p>FORMULA: C6H11O9P</p></html>
        </notes>
      </species>
      <species id="M_man_c" name="D-Mannose" compartment="C_c">
        <notes>
          <html xmlns="http://www.w3.org/1999/xhtml"><p>FORMULA: C6H12O6</p></html>
        </notes>
      </species>
      <species id="M_marach_c" name="methyl-arachidic-acid" compartment="C_c">
        <notes>
          <html xmlns="http://www.w3.org/1999/xhtml"><p>FORMULA: C21H41O2</p></html>
        </notes>
      </species>
      <species id="M_mbhn_c" name="methyl-behenic-acid" compartment="C_c">
        <notes>
          <html xmlns="http://www.w3.org/1999/xhtml"><p>FORMULA: C23H45O2</p></html>
        </notes>
      </species>
      <species id="M_mcbts_c" name="mycobactin-S" compartment="C_c">
        <notes>
          <html xmlns="http://www.w3.org/1999/xhtml"><p>FORMULA: C44H73N5O10</p></html>
        </notes>
      </species>
      <species id="M_mcbtt_c" name="mycobactin-T" compartment="C_c">
        <notes>
          <html xmlns="http://www.w3.org/1999/xhtml"><p>FORMULA: C43H71N5O10</p></html>
        </notes>
      </species>
      <species id="M_meoh_c" name="Methanol" compartment="C_c">
        <notes>
          <html xmlns="http://www.w3.org/1999/xhtml"><p>FORMULA: CH4O1</p></html>
        </notes>
      </species>
      <species id="M_meoh_e" name="Methanol" compartment="C_e">
        <notes>
          <html xmlns="http://www.w3.org/1999/xhtml"><p>FORMULA: CH4O1</p></html>
        </notes>
      </species>
      <species id="M_meroacidACP_c" name="alpha-meroacid-ACP" compartment="C_c">
        <notes>
          <html xmlns="http://www.w3.org/1999/xhtml"><p>FORMULA: C61H115N2O8PRS</p></html>
        </notes>
      </species>
      <species id="M_meroacidcyc1ACP_c" name="cyclopropanated-alpha-meroacid-ACP-1-cyclopropane-ring" compartment="C_c">
        <notes>
          <html xmlns="http://www.w3.org/1999/xhtml"><p>FORMULA: C62H117N2O8PRS</p></html>
        </notes>
      </species>
      <species id="M_meroacidcyc2ACP_c" name="cyclopropanated-alpha-meroacid-ACP-2-cyclopropane-rings" compartment="C_c">
        <notes>
          <html xmlns="http://www.w3.org/1999/xhtml"><p>FORMULA: C63H119N2O8PRS</p></html>
        </notes>
      </species>
      <species id="M_meroacidcyc2AMP_c" name="cyclopropanated-alpha-meroacid-AMP-2-cyclopropane-rings" compartment="C_c">
        <notes>
          <html xmlns="http://www.w3.org/1999/xhtml"><p>FORMULA: C62H111N5O8P</p></html>
        </notes>
      </species>
      <species id="M_met_L_c" name="L-Methionine" compartment="C_c">
        <notes>
          <html xmlns="http://www.w3.org/1999/xhtml"><p>FORMULA: C5H11NO2S</p></html>
        </notes>
      </species>
      <species id="M_met_L_e" name="L-Methionine" compartment="C_e">
        <notes>
          <html xmlns="http://www.w3.org/1999/xhtml"><p>FORMULA: C5H11NO2S</p></html>
        </notes>
      </species>
      <species id="M_methf_c" name="5-10-Methenyltetrahydrofolate" compartment="C_c">
        <notes>
          <html xmlns="http://www.w3.org/1999/xhtml"><p>FORMULA: C20H20N7O6</p></html>
        </notes>
      </species>
      <species id="M_metsox_R_L_c" name="L-methionine-R-sulfoxide" compartment="C_c">
        <notes>
          <html xmlns="http://www.w3.org/1999/xhtml"><p>FORMULA: C5H11NO3S</p></html>
        </notes>
      </species>
      <species id="M_metsox_S_L_c" name="L-Methionine-Sulfoxide" compartment="C_c">
        <notes>
          <html xmlns="http://www.w3.org/1999/xhtml"><p>FORMULA: C5H11NO3S</p></html>
        </notes>
      </species>
      <species id="M_mettrna_c" name="L-Methionyl-tRNA-Met" compartment="C_c">
        <notes>
          <html xmlns="http://www.w3.org/1999/xhtml"><p>FORMULA: C5H10NOSR</p></html>
        </notes>
      </species>
      <species id="M_mfrrppdima_c" name="phenolic-glycolipid-Mtb" compartment="C_c">
        <notes>
          <html xmlns="http://www.w3.org/1999/xhtml"><p>FORMULA: C121H226O18</p></html>
        </notes>
      </species>
      <species id="M_mg2_c" name="magnesium" compartment="C_c">
        <notes>
          <html xmlns="http://www.w3.org/1999/xhtml"><p>FORMULA: Mg</p></html>
        </notes>
      </species>
      <species id="M_mg2_e" name="magnesium" compartment="C_e">
        <notes>
          <html xmlns="http://www.w3.org/1999/xhtml"><p>FORMULA: Mg</p></html>
        </notes>
      </species>
      <species id="M_mharab_D_c" name="mannose-capped-hexa-arabinofuranoside" compartment="C_c">
        <notes>
          <html xmlns="http://www.w3.org/1999/xhtml"><p>FORMULA: C48H80O40</p></html>
        </notes>
      </species>
      <species id="M_mhpglu_c" name="5-Methyltetrahydropteroyltri-L-glutamate" compartment="C_c">
        <notes>
          <html xmlns="http://www.w3.org/1999/xhtml"><p>FORMULA: C25H36N8O12</p></html>
        </notes>
      </species>
      <species id="M_mi1p_D_c" name="1D-myo-Inositol-1-phosphate" compartment="C_c">
        <notes>
          <html xmlns="http://www.w3.org/1999/xhtml"><p>FORMULA: C6H11O9P</p></html>
        </notes>
      </species>
      <species id="M_mi3p_D_c" name="1D-myo-Inositol-3-phosphate" compartment="C_c">
        <notes>
          <html xmlns="http://www.w3.org/1999/xhtml"><p>FORMULA: C6H11O9P</p></html>
        </notes>
      </species>
      <species id="M_mi4p_D_c" name="1D-myo-Inositol-4-phosphate" compartment="C_c">
        <notes>
          <html xmlns="http://www.w3.org/1999/xhtml"><p>FORMULA: C6H11O9P</p></html>
        </notes>
      </species>
      <species id="M_mkmeroacidACP_c" name="methyl-hydroxy-keto-meroacid-ACP-1-cyclopropane-ring" compartment="C_c">
        <notes>
          <html xmlns="http://www.w3.org/1999/xhtml"><p>FORMULA: C70H135N2O9PRS</p></html>
        </notes>
      </species>
      <species id="M_mkmeroacidcyc1ACP_c" name="cyclopropanated-methyl-hydroxy-keto-meroacid-ACP-1-cyclopropane-ring" compartment="C_c">
        <notes>
          <html xmlns="http://www.w3.org/1999/xhtml"><p>FORMULA: C71H137N2O9PRS</p></html>
        </notes>
      </species>
      <species id="M_mkmeroacidcyc1AMP_c" name="cyclopropanated-methyl-hydroxy-keto-meroacid-AMP-1-cyclopropane-ring" compartment="C_c">
        <notes>
          <html xmlns="http://www.w3.org/1999/xhtml"><p>FORMULA: C70H129N5O9P</p></html>
        </notes>
      </species>
      <species id="M_mkmycolate_c" name="keto-mycolate-1-cyclopropanated-rings" compartment="C_c">
        <notes>
          <html xmlns="http://www.w3.org/1999/xhtml"><p>FORMULA: C86H168O4</p></html>
        </notes>
      </species>
      <species id="M_mlthf_c" name="5-10-Methylenetetrahydrofolate" compartment="C_c">
        <notes>
          <html xmlns="http://www.w3.org/1999/xhtml"><p>FORMULA: C20H21N7O6</p></html>
        </notes>
      </species>
      <species id="M_mmcoa_R_c" name="R-Methylmalonyl-CoA" compartment="C_c">
        <notes>
          <html xmlns="http://www.w3.org/1999/xhtml"><p>FORMULA: C25H35N7O19P3S</p></html>
        </notes>
      </species>
      <species id="M_mmcoa_S_c" name="S-Methylmalonyl-CoA" compartment="C_c">
        <notes>
          <html xmlns="http://www.w3.org/1999/xhtml"><p>FORMULA: C25H35N7O19P3S</p></html>
        </notes>
      </species>
      <species id="M_mmeroacidACP_c" name="methoxy-meroacid-ACP" compartment="C_c">
        <notes>
          <html xmlns="http://www.w3.org/1999/xhtml"><p>FORMULA: C67H127N2O8PRS</p></html>
        </notes>
      </species>
      <species id="M_mmeroacidcyc1ACP_c" name="cyclopropanated-methoxy-meroacid-ACP-1-cyclopropane-ring" compartment="C_c">
        <notes>
          <html xmlns="http://www.w3.org/1999/xhtml"><p>FORMULA: C68H129N2O8PRS</p></html>
        </notes>
      </species>
      <species id="M_mmeroacidcyc2ACP_c" name="cyclopropanated-methoxy-meroacid-ACP-2-cyclopropane-rings" compartment="C_c">
        <notes>
          <html xmlns="http://www.w3.org/1999/xhtml"><p>FORMULA: C69H131N2O8PRS</p></html>
        </notes>
      </species>
      <species id="M_mmeroacidcyc2AMP_c" name="cyclopropanated-methoxy-meroacid-AMP-2-cyclopropane-rings" compartment="C_c">
        <notes>
          <html xmlns="http://www.w3.org/1999/xhtml"><p>FORMULA: C68H123N5O8P</p></html>
        </notes>
      </species>
      <species id="M_mmmeroacidACP_c" name="methyl-hydroxy-methoxy-meroacid-ACP" compartment="C_c">
        <notes>
          <html xmlns="http://www.w3.org/1999/xhtml"><p>FORMULA: C68H131N2O9PRS</p></html>
        </notes>
      </species>
      <species id="M_mmmeroacidcyc1ACP_c" name="cyclopropanated-methyl-hydroxy-methoxy-meroacid-ACP-1-cyclopropane-ring" compartment="C_c">
        <notes>
          <html xmlns="http://www.w3.org/1999/xhtml"><p>FORMULA: C69H133N2O9PRS</p></html>
        </notes>
      </species>
      <species id="M_mmmeroacidcyc1AMP_c" name="cyclopropanated-methyl-hydroxy-methoxy-meroacid-AMP-1-cyclopropane-ring" compartment="C_c">
        <notes>
          <html xmlns="http://www.w3.org/1999/xhtml"><p>FORMULA: C68H125N5O9P</p></html>
        </notes>
      </species>
      <species id="M_mmmycolate_c" name="methoxy-mycolate-1-cyclopropanated-ring" compartment="C_c">
        <notes>
          <html xmlns="http://www.w3.org/1999/xhtml"><p>FORMULA: C84H164O4</p></html>
        </notes>
      </species>
      <species id="M_mmycolate_c" name="methoxy-mycolate-2-cyclopropanated-rings" compartment="C_c">
        <notes>
          <html xmlns="http://www.w3.org/1999/xhtml"><p>FORMULA: C84H162O3</p></html>
        </notes>
      </species>
      <species id="M_mndn_c" name="menadione" compartment="C_c">
        <notes>
          <html xmlns="http://www.w3.org/1999/xhtml"><p>FORMULA: C11H8O2</p></html>
        </notes>
      </species>
      <species id="M_mocdca_c" name="10-methylstearic-acid" compartment="C_c">
        <notes>
          <html xmlns="http://www.w3.org/1999/xhtml"><p>FORMULA: C19H37O2</p></html>
        </notes>
      </species>
      <species id="M_motre_c" name="maltooligosyltrehalose" compartment="C_c">
        <notes>
          <html xmlns="http://www.w3.org/1999/xhtml"><p>FORMULA: C42H72O36</p></html>
        </notes>
      </species>
      <species id="M_mppp9_c" name="Magnesium-protoporphyrin" compartment="C_c">
        <notes>
          <html xmlns="http://www.w3.org/1999/xhtml"><p>FORMULA: C34H30MgN4O4</p></html>
        </notes>
      </species>
      <species id="M_mql6_c" name="Menaquinol-6" compartment="C_c">
        <notes>
          <html xmlns="http://www.w3.org/1999/xhtml"><p>FORMULA: C41H58O2</p></html>
        </notes>
      </species>
      <species id="M_mql8_c" name="Menaquinol-8" compartment="C_c">
        <notes>
          <html xmlns="http://www.w3.org/1999/xhtml"><p>FORMULA: C51H74O2</p></html>
        </notes>
      </species>
      <species id="M_mqn6_c" name="Menaquinone-6" compartment="C_c">
        <notes>
          <html xmlns="http://www.w3.org/1999/xhtml"><p>FORMULA: C41H56O2</p></html>
        </notes>
      </species>
      <species id="M_mqn8_c" name="Menaquinone-8" compartment="C_c">
        <notes>
          <html xmlns="http://www.w3.org/1999/xhtml"><p>FORMULA: C51H72O2</p></html>
        </notes>
      </species>
      <species id="M_msa_c" name="Malonate-semialdehyde" compartment="C_c">
        <notes>
          <html xmlns="http://www.w3.org/1999/xhtml"><p>FORMULA: C3H3O3</p></html>
        </notes>
      </species>
      <species id="M_msh_c" name="mycothiol-reduced" compartment="C_c">
        <notes>
          <html xmlns="http://www.w3.org/1999/xhtml"><p>FORMULA: C17H30N2O12S</p></html>
        </notes>
      </species>
      <species id="M_mshfald_c" name="mycothiol-conjugated-methanol" compartment="C_c">
        <notes>
          <html xmlns="http://www.w3.org/1999/xhtml"><p>FORMULA: C18H32N2O13S</p></html>
        </notes>
      </species>
      <species id="M_mshfaldox_c" name="mycothiol-conjugated-aldehyde" compartment="C_c">
        <notes>
          <html xmlns="http://www.w3.org/1999/xhtml"><p>FORMULA: C18H30N2O13S</p></html>
        </notes>
      </species>
      <species id="M_mssg_c" name="mycothiol-oxidized-dimer" compartment="C_c">
        <notes>
          <html xmlns="http://www.w3.org/1999/xhtml"><p>FORMULA: C34H58N4O24S2</p></html>
        </notes>
      </species>
      <species id="M_mstrACP_c" name="10methyl-stearyoyl-ACP" compartment="C_c">
        <notes>
          <html xmlns="http://www.w3.org/1999/xhtml"><p>FORMULA: C30H57N2O8PRS</p></html>
        </notes>
      </species>
      <species id="M_mycolate_c" name="mycolate-2-cyclopropanated-rings" compartment="C_c">
        <notes>
          <html xmlns="http://www.w3.org/1999/xhtml"><p>FORMULA: C78H150O3</p></html>
        </notes>
      </species>
      <species id="M_na1_c" name="Sodium" compartment="C_c">
        <notes>
          <html xmlns="http://www.w3.org/1999/xhtml"><p>FORMULA: Na</p></html>
        </notes>
      </species>
      <species id="M_na1_e" name="Sodium" compartment="C_e">
        <notes>
          <html xmlns="http://www.w3.org/1999/xhtml"><p>FORMULA: Na</p></html>
        </notes>
      </species>
      <species id="M_nac_c" name="Nicotinate" compartment="C_c">
        <notes>
          <html xmlns="http://www.w3.org/1999/xhtml"><p>FORMULA: C6H4NO2</p></html>
        </notes>
      </species>
      <species id="M_nad_c" name="Nicotinamide-adenine-dinucleotide" compartment="C_c">
        <notes>
          <html xmlns="http://www.w3.org/1999/xhtml"><p>FORMULA: C21H26N7O14P2</p></html>
        </notes>
      </species>
      <species id="M_nadh_c" name="Nicotinamide-adenine-dinucleotide-reduced" compartment="C_c">
        <notes>
          <html xmlns="http://www.w3.org/1999/xhtml"><p>FORMULA: C21H27N7O14P2</p></html>
        </notes>
      </species>
      <species id="M_nadp_c" name="Nicotinamide-adenine-dinucleotide-phosphate" compartment="C_c">
        <notes>
          <html xmlns="http://www.w3.org/1999/xhtml"><p>FORMULA: C21H25N7O17P3</p></html>
        </notes>
      </species>
      <species id="M_nadph_c" name="Nicotinamide-adenine-dinucleotide-phosphate-reduced" compartment="C_c">
        <notes>
          <html xmlns="http://www.w3.org/1999/xhtml"><p>FORMULA: C21H26N7O17P3</p></html>
        </notes>
      </species>
      <species id="M_ncam_c" name="Nicotinamide" compartment="C_c">
        <notes>
          <html xmlns="http://www.w3.org/1999/xhtml"><p>FORMULA: C6H6N2O</p></html>
        </notes>
      </species>
      <species id="M_nh4_c" name="Ammonium" compartment="C_c">
        <notes>
          <html xmlns="http://www.w3.org/1999/xhtml"><p>FORMULA: H4N</p></html>
        </notes>
      </species>
      <species id="M_nh4_e" name="Ammonium" compartment="C_e">
        <notes>
          <html xmlns="http://www.w3.org/1999/xhtml"><p>FORMULA: H4N</p></html>
        </notes>
      </species>
      <species id="M_nh4oh_c" name="Ammonium-hydroxide" compartment="C_c">
        <notes>
          <html xmlns="http://www.w3.org/1999/xhtml"><p>FORMULA: H5NO</p></html>
        </notes>
      </species>
      <species id="M_nicrnt_c" name="Nicotinate-D-ribonucleotide" compartment="C_c">
        <notes>
          <html xmlns="http://www.w3.org/1999/xhtml"><p>FORMULA: C11H12NO9P</p></html>
        </notes>
      </species>
      <species id="M_no2_c" name="Nitrite" compartment="C_c">
        <notes>
          <html xmlns="http://www.w3.org/1999/xhtml"><p>FORMULA: NO2</p></html>
        </notes>
      </species>
      <species id="M_no2_e" name="Nitrite" compartment="C_e">
        <notes>
          <html xmlns="http://www.w3.org/1999/xhtml"><p>FORMULA: NO2</p></html>
        </notes>
      </species>
      <species id="M_no3_c" name="Nitrate" compartment="C_c">
        <notes>
          <html xmlns="http://www.w3.org/1999/xhtml"><p>FORMULA: NO3</p></html>
        </notes>
      </species>
      <species id="M_no3_e" name="Nitrate" compartment="C_e">
        <notes>
          <html xmlns="http://www.w3.org/1999/xhtml"><p>FORMULA: NO3</p></html>
        </notes>
      </species>
      <species id="M_no_c" name="Nitric-oxide" compartment="C_c">
        <notes>
          <html xmlns="http://www.w3.org/1999/xhtml"><p>FORMULA: NO</p></html>
        </notes>
      </species>
      <species id="M_no_e" name="Nitric-oxide" compartment="C_e">
        <notes>
          <html xmlns="http://www.w3.org/1999/xhtml"><p>FORMULA: NO</p></html>
        </notes>
      </species>
      <species id="M_o2_c" name="O2" compartment="C_c">
        <notes>
          <html xmlns="http://www.w3.org/1999/xhtml"><p>FORMULA: O2</p></html>
        </notes>
      </species>
      <species id="M_o2_e" name="O2" compartment="C_e">
        <notes>
          <html xmlns="http://www.w3.org/1999/xhtml"><p>FORMULA: O2</p></html>
        </notes>
      </species>
      <species id="M_o2s_c" name="Superoxide-anion" compartment="C_c">
        <notes>
          <html xmlns="http://www.w3.org/1999/xhtml"><p>FORMULA: O2</p></html>
        </notes>
      </species>
      <species id="M_oaa_c" name="Oxaloacetate" compartment="C_c">
        <notes>
          <html xmlns="http://www.w3.org/1999/xhtml"><p>FORMULA: C4H2O5</p></html>
        </notes>
      </species>
      <species id="M_occoa_c" name="Octanoyl-CoA-n-C80CoA" compartment="C_c">
        <notes>
          <html xmlns="http://www.w3.org/1999/xhtml"><p>FORMULA: C29H46N7O17P3S</p></html>
        </notes>
      </species>
      <species id="M_ocdca_c" name="octadecanoate-n-C180" compartment="C_c">
        <notes>
          <html xmlns="http://www.w3.org/1999/xhtml"><p>FORMULA: C18H35O2</p></html>
        </notes>
      </species>
      <species id="M_ocdca_e" name="octadecanoate-n-C180" compartment="C_e">
        <notes>
          <html xmlns="http://www.w3.org/1999/xhtml"><p>FORMULA: C18H35O2</p></html>
        </notes>
      </species>
      <species id="M_ocdcea_c" name="octadecenoate-n-C181" compartment="C_c">
        <notes>
          <html xmlns="http://www.w3.org/1999/xhtml"><p>FORMULA: C18H33O2</p></html>
        </notes>
      </species>
      <species id="M_octa_c" name="octanoate-n-C80" compartment="C_c">
        <notes>
          <html xmlns="http://www.w3.org/1999/xhtml"><p>FORMULA: C8H15O2</p></html>
        </notes>
      </species>
      <species id="M_octdp_c" name="all-trans-Octaprenyl-diphosphate" compartment="C_c">
        <notes>
          <html xmlns="http://www.w3.org/1999/xhtml"><p>FORMULA: C40H65O7P2</p></html>
        </notes>
      </species>
      <species id="M_odecoa_c" name="Octadecenoyl-CoA-n-C181CoA" compartment="C_c">
        <notes>
          <html xmlns="http://www.w3.org/1999/xhtml"><p>FORMULA: C39H64N7O17P3S</p></html>
        </notes>
      </species>
      <species id="M_ohpb_c" name="2-Oxo-3-hydroxy-4-phosphobutanoate" compartment="C_c">
        <notes>
          <html xmlns="http://www.w3.org/1999/xhtml"><p>FORMULA: C4H4O8P</p></html>
        </notes>
      </species>
      <species id="M_omdtria_c" name="octa-methyl-dotriacontanoic-acid-C320-with-7-methyl-branches" compartment="C_c">
        <notes>
          <html xmlns="http://www.w3.org/1999/xhtml"><p>FORMULA: C40H79O2</p></html>
        </notes>
      </species>
      <species id="M_omtta_c" name="octa-methyl-tetracontatricosanoic-acid-C340-8-methyl-branched-carbons" compartment="C_c">
        <notes>
          <html xmlns="http://www.w3.org/1999/xhtml"><p>FORMULA: C42H83O2</p></html>
        </notes>
      </species>
      <species id="M_orn_c" name="Ornithine" compartment="C_c">
        <notes>
          <html xmlns="http://www.w3.org/1999/xhtml"><p>FORMULA: C5H13N2O2</p></html>
        </notes>
      </species>
      <species id="M_orn_e" name="Ornithine" compartment="C_e">
        <notes>
          <html xmlns="http://www.w3.org/1999/xhtml"><p>FORMULA: C5H13N2O2</p></html>
        </notes>
      </species>
      <species id="M_orot5p_c" name="Orotidine-5-phosphate" compartment="C_c">
        <notes>
          <html xmlns="http://www.w3.org/1999/xhtml"><p>FORMULA: C10H10N2O11P</p></html>
        </notes>
      </species>
      <species id="M_orot_c" name="Orotate" compartment="C_c">
        <notes>
          <html xmlns="http://www.w3.org/1999/xhtml"><p>FORMULA: C5H3N2O4</p></html>
        </notes>
      </species>
      <species id="M_oxa_c" name="Oxalate" compartment="C_c">
        <notes>
          <html xmlns="http://www.w3.org/1999/xhtml"><p>FORMULA: C2O4</p></html>
        </notes>
      </species>
      <species id="M_oxalcoa_c" name="Oxalyl-CoA" compartment="C_c">
        <notes>
          <html xmlns="http://www.w3.org/1999/xhtml"><p>FORMULA: C23H31N7O19P3S</p></html>
        </notes>
      </species>
      <species id="M_pa160190_c" name="1-2-sn-glycerol-3-phosphate" compartment="C_c">
        <notes>
          <html xmlns="http://www.w3.org/1999/xhtml"><p>FORMULA: C38H73O8P</p></html>
        </notes>
      </species>
      <species id="M_pa160_c" name="1-2-dihexadecanoyl-sn-glycerol-3-phosphate" compartment="C_c">
        <notes>
          <html xmlns="http://www.w3.org/1999/xhtml"><p>FORMULA: C35H67O8P1</p></html>
        </notes>
      </species>
      <species id="M_pa190190_c" name="1-2-sn-glycerol-3-phosphate" compartment="C_c">
        <notes>
          <html xmlns="http://www.w3.org/1999/xhtml"><p>FORMULA: C41H79O8P</p></html>
        </notes>
      </species>
      <species id="M_pac_c" name="Phenylacetic-acid" compartment="C_c">
        <notes>
          <html xmlns="http://www.w3.org/1999/xhtml"><p>FORMULA: C8H7O2</p></html>
        </notes>
      </species>
      <species id="M_pac_e" name="Phenylacetic-acid" compartment="C_e">
        <notes>
          <html xmlns="http://www.w3.org/1999/xhtml"><p>FORMULA: C8H7O2</p></html>
        </notes>
      </species>
      <species id="M_pacald_c" name="Phenylacetaldehyde" compartment="C_c">
        <notes>
          <html xmlns="http://www.w3.org/1999/xhtml"><p>FORMULA: C8H8O</p></html>
        </notes>
      </species>
      <species id="M_palmACP_c" name="Palmitoyl-ACP-n-C160ACP" compartment="C_c">
        <notes>
          <html xmlns="http://www.w3.org/1999/xhtml"><p>FORMULA: C27H51N2O8PRS</p></html>
        </notes>
      </species>
      <species id="M_pan4p_c" name="Pantetheine-4-phosphate" compartment="C_c">
        <notes>
          <html xmlns="http://www.w3.org/1999/xhtml"><p>FORMULA: C11H21N2O7PS</p></html>
        </notes>
      </species>
      <species id="M_pant_R_c" name="R-Pantoate" compartment="C_c">
        <notes>
          <html xmlns="http://www.w3.org/1999/xhtml"><p>FORMULA: C6H11O4</p></html>
        </notes>
      </species>
      <species id="M_pap_c" name="Adenosine-3-5-bisphosphate" compartment="C_c">
        <notes>
          <html xmlns="http://www.w3.org/1999/xhtml"><p>FORMULA: C10H11N5O10P2</p></html>
        </notes>
      </species>
      <species id="M_paps_c" name="3-Phosphoadenylyl-sulfate" compartment="C_c">
        <notes>
          <html xmlns="http://www.w3.org/1999/xhtml"><p>FORMULA: C10H11N5O13P2S</p></html>
        </notes>
      </species>
      <species id="M_pat_c" name="penta-acyl-trehalose" compartment="C_c">
        <notes>
          <html xmlns="http://www.w3.org/1999/xhtml"><p>FORMULA: C138H264O16</p></html>
        </notes>
      </species>
      <species id="M_pdima_c" name="phthiocerol-dimycocerosate-A-Mtb" compartment="C_c">
        <notes>
          <html xmlns="http://www.w3.org/1999/xhtml"><p>FORMULA: C96H190O5</p></html>
        </notes>
      </species>
      <species id="M_pdima_e" name="phthiocerol-dimycocerosate-A-Mtb" compartment="C_e">
        <notes>
          <html xmlns="http://www.w3.org/1999/xhtml"><p>FORMULA: C96H190O5</p></html>
        </notes>
      </species>
      <species id="M_pdx5p_c" name="Pyridoxine-5-phosphate" compartment="C_c">
        <notes>
          <html xmlns="http://www.w3.org/1999/xhtml"><p>FORMULA: C8H10NO6P</p></html>
        </notes>
      </species>
      <species id="M_pe160_c" name="phosphatidylethanolamine-dihexadecanoyl-n-C160" compartment="C_c">
        <notes>
          <html xmlns="http://www.w3.org/1999/xhtml"><p>FORMULA: C37H74N1O8P1</p></html>
        </notes>
      </species>
      <species id="M_pe180_c" name="phosphatidylethanolamine-dioctadecanoyl-n-C180" compartment="C_c">
        <notes>
          <html xmlns="http://www.w3.org/1999/xhtml"><p>FORMULA: C41H82N1O8P1</p></html>
        </notes>
      </species>
      <species id="M_peamn_c" name="Phenethylamine" compartment="C_c">
        <notes>
          <html xmlns="http://www.w3.org/1999/xhtml"><p>FORMULA: C8H12N</p></html>
        </notes>
      </species>
      <species id="M_pep_c" name="Phosphoenolpyruvate" compartment="C_c">
        <notes>
          <html xmlns="http://www.w3.org/1999/xhtml"><p>FORMULA: C3H2O6P</p></html>
        </notes>
      </species>
      <species id="M_peptido_EC_c" name="Peptidoglycan-subunit-of-Escherichia-coli" compartment="C_c">
        <notes>
          <html xmlns="http://www.w3.org/1999/xhtml"><p>FORMULA: C40H62N8O21</p></html>
        </notes>
      </species>
      <species id="M_peptido_TB1_c" name="peptidoglycan-subunit-for-Mycobacterium-tuberculosis" compartment="C_c">
        <notes>
          <html xmlns="http://www.w3.org/1999/xhtml"><p>FORMULA: C39H63N8O19</p></html>
        </notes>
      </species>
      <species id="M_peptido_TB2_c" name="peptidoglycan-subunit-for-Mycobacterium-tuberculosis" compartment="C_c">
        <notes>
          <html xmlns="http://www.w3.org/1999/xhtml"><p>FORMULA: C39H63N8O19</p></html>
        </notes>
      </species>
      <species id="M_pg160190_c" name="Phosphatidylglycerol-hexadecanoyl-methylstearoyl" compartment="C_c">
        <notes>
          <html xmlns="http://www.w3.org/1999/xhtml"><p>FORMULA: C41H80O10P</p></html>
        </notes>
      </species>
      <species id="M_pg160_c" name="Phosphatidylglycerol-dihexadecanoyl-n-C160" compartment="C_c">
        <notes>
          <html xmlns="http://www.w3.org/1999/xhtml"><p>FORMULA: C38H74O10P1</p></html>
        </notes>
      </species>
      <species id="M_pg190_c" name="Phosphatidylglycerol-dimethylstearoyl-C190" compartment="C_c">
        <notes>
          <html xmlns="http://www.w3.org/1999/xhtml"><p>FORMULA: C44H86O10P</p></html>
        </notes>
      </species>
      <species id="M_pgp160190_c" name="Phosphatidylglycerophosphate-hexadecanoyl-tuberculostearoyl-C160-C190" compartment="C_c">
        <notes>
          <html xmlns="http://www.w3.org/1999/xhtml"><p>FORMULA: C41H79O13P2</p></html>
        </notes>
      </species>
      <species id="M_pgp160_c" name="Phosphatidylglycerophosphate-dihexadecanoyl-n-C160" compartment="C_c">
        <notes>
          <html xmlns="http://www.w3.org/1999/xhtml"><p>FORMULA: C38H73O13P2</p></html>
        </notes>
      </species>
      <species id="M_pgp190_c" name="Phosphatidylglycerophosphate-dituberculostearoyl-C190" compartment="C_c">
        <notes>
          <html xmlns="http://www.w3.org/1999/xhtml"><p>FORMULA: C44H85O13P2</p></html>
        </notes>
      </species>
      <species id="M_phdcaACP_c" name="phenol-palmitic-acid-ACP" compartment="C_c">
        <notes>
          <html xmlns="http://www.w3.org/1999/xhtml"><p>FORMULA: C34H57N2O9PRS</p></html>
        </notes>
      </species>
      <species id="M_phdca_c" name="phenol-palmitic-acid" compartment="C_c">
        <notes>
          <html xmlns="http://www.w3.org/1999/xhtml"><p>FORMULA: C23H37O3</p></html>
        </notes>
      </species>
      <species id="M_phdca_e" name="phenol-palmitic-acid" compartment="C_e">
        <notes>
          <html xmlns="http://www.w3.org/1999/xhtml"><p>FORMULA: C23H37O3</p></html>
        </notes>
      </species>
      <species id="M_phdcacoa_c" name="phenol-palmitic-coenzyme-A" compartment="C_c">
        <notes>
          <html xmlns="http://www.w3.org/1999/xhtml"><p>FORMULA: C44H68N7O18P3S</p></html>
        </notes>
      </species>
      <species id="M_phe_L_c" name="L-Phenylalanine" compartment="C_c">
        <notes>
          <html xmlns="http://www.w3.org/1999/xhtml"><p>FORMULA: C9H11NO2</p></html>
        </notes>
      </species>
      <species id="M_phe_L_e" name="L-Phenylalanine" compartment="C_e">
        <notes>
          <html xmlns="http://www.w3.org/1999/xhtml"><p>FORMULA: C9H11NO2</p></html>
        </notes>
      </species>
      <species id="M_pheme_c" name="Protoheme" compartment="C_c">
        <notes>
          <html xmlns="http://www.w3.org/1999/xhtml"><p>FORMULA: C34H30FeN4O4</p></html>
        </notes>
      </species>
      <species id="M_phom_c" name="O-Phospho-L-homoserine" compartment="C_c">
        <notes>
          <html xmlns="http://www.w3.org/1999/xhtml"><p>FORMULA: C4H8NO6P</p></html>
        </notes>
      </species>
      <species id="M_phpyr_c" name="Phenylpyruvate" compartment="C_c">
        <notes>
          <html xmlns="http://www.w3.org/1999/xhtml"><p>FORMULA: C9H7O3</p></html>
        </notes>
      </species>
      <species id="M_phthcl_c" name="phthiocol-oxidized" compartment="C_c">
        <notes>
          <html xmlns="http://www.w3.org/1999/xhtml"><p>FORMULA: C11H8O3</p></html>
        </notes>
      </species>
      <species id="M_phthclh2_c" name="phthiocol-reduced" compartment="C_c">
        <notes>
          <html xmlns="http://www.w3.org/1999/xhtml"><p>FORMULA: C11H10O3</p></html>
        </notes>
      </species>
      <species id="M_phthdl_c" name="phthiodolone" compartment="C_c">
        <notes>
          <html xmlns="http://www.w3.org/1999/xhtml"><p>FORMULA: C31H62O3</p></html>
        </notes>
      </species>
      <species id="M_phthiocerol_c" name="phthiocerol-A" compartment="C_c">
        <notes>
          <html xmlns="http://www.w3.org/1999/xhtml"><p>FORMULA: C32H66O3</p></html>
        </notes>
      </species>
      <species id="M_phthr_c" name="O-Phospho-4-hydroxy-L-threonine" compartment="C_c">
        <notes>
          <html xmlns="http://www.w3.org/1999/xhtml"><p>FORMULA: C4H8NO7P</p></html>
        </notes>
      </species>
      <species id="M_pi_c" name="Phosphate" compartment="C_c">
        <notes>
          <html xmlns="http://www.w3.org/1999/xhtml"><p>FORMULA: HO4P</p></html>
        </notes>
      </species>
      <species id="M_pi_e" name="Phosphate" compartment="C_e">
        <notes>
          <html xmlns="http://www.w3.org/1999/xhtml"><p>FORMULA: HO4P</p></html>
        </notes>
      </species>
      <species id="M_pmcoa_c" name="Pimeloyl-CoA" compartment="C_c">
        <notes>
          <html xmlns="http://www.w3.org/1999/xhtml"><p>FORMULA: C28H41N7O19P3S</p></html>
        </notes>
      </species>
      <species id="M_pmhexc_c" name="penta-methyl-hexacosanoate" compartment="C_c">
        <notes>
          <html xmlns="http://www.w3.org/1999/xhtml"><p>FORMULA: C31H61O2</p></html>
        </notes>
      </species>
      <species id="M_pmocta_c" name="penta-methyl-octacosanoate" compartment="C_c">
        <notes>
          <html xmlns="http://www.w3.org/1999/xhtml"><p>FORMULA: C33H65O2</p></html>
        </notes>
      </species>
      <species id="M_pmtcoa_c" name="Palmitoyl-CoA-n-C160CoA" compartment="C_c">
        <notes>
          <html xmlns="http://www.w3.org/1999/xhtml"><p>FORMULA: C37H62N7O17P3S</p></html>
        </notes>
      </species>
      <species id="M_pnto_R_c" name="R-Pantothenate" compartment="C_c">
        <notes>
          <html xmlns="http://www.w3.org/1999/xhtml"><p>FORMULA: C9H16NO5</p></html>
        </notes>
      </species>
      <species id="M_ppa_c" name="Propionate-n-C30" compartment="C_c">
        <notes>
          <html xmlns="http://www.w3.org/1999/xhtml"><p>FORMULA: C3H5O2</p></html>
        </notes>
      </species>
      <species id="M_ppa_e" name="Propionate-n-C30" compartment="C_e">
        <notes>
          <html xmlns="http://www.w3.org/1999/xhtml"><p>FORMULA: C3H5O2</p></html>
        </notes>
      </species>
      <species id="M_ppal_c" name="Propanal" compartment="C_c">
        <notes>
          <html xmlns="http://www.w3.org/1999/xhtml"><p>FORMULA: C3H6O</p></html>
        </notes>
      </species>
      <species id="M_ppbng_c" name="Porphobilinogen" compartment="C_c">
        <notes>
          <html xmlns="http://www.w3.org/1999/xhtml"><p>FORMULA: C10H13N2O4</p></html>
        </notes>
      </species>
      <species id="M_ppcoa_c" name="Propanoyl-CoA" compartment="C_c">
        <notes>
          <html xmlns="http://www.w3.org/1999/xhtml"><p>FORMULA: C24H36N7O17P3S</p></html>
        </notes>
      </species>
      <species id="M_ppdima_c" name="phenol-phthiocerol-dimycocerosate-Mtb" compartment="C_c">
        <notes>
          <html xmlns="http://www.w3.org/1999/xhtml"><p>FORMULA: C99H188O6</p></html>
        </notes>
      </species>
      <species id="M_ppdima_e" name="phenol-phthiocerol-dimycocerosate-Mtb" compartment="C_e">
        <notes>
          <html xmlns="http://www.w3.org/1999/xhtml"><p>FORMULA: C99H188O6</p></html>
        </notes>
      </species>
      <species id="M_pphn_c" name="Prephenate" compartment="C_c">
        <notes>
          <html xmlns="http://www.w3.org/1999/xhtml"><p>FORMULA: C10H8O6</p></html>
        </notes>
      </species>
      <species id="M_pphthdl_c" name="phenolic-phthiodiolone" compartment="C_c">
        <notes>
          <html xmlns="http://www.w3.org/1999/xhtml"><p>FORMULA: C34H60O4</p></html>
        </notes>
      </species>
      <species id="M_pphthiocerol_c" name="phenolphtiocerol" compartment="C_c">
        <notes>
          <html xmlns="http://www.w3.org/1999/xhtml"><p>FORMULA: C35H64O4</p></html>
        </notes>
      </species>
      <species id="M_ppi_c" name="Diphosphate" compartment="C_c">
        <notes>
          <html xmlns="http://www.w3.org/1999/xhtml"><p>FORMULA: HO7P2</p></html>
        </notes>
      </species>
      <species id="M_ppp9_c" name="Protoporphyrin" compartment="C_c">
        <notes>
          <html xmlns="http://www.w3.org/1999/xhtml"><p>FORMULA: C34H32N4O4</p></html>
        </notes>
      </species>
      <species id="M_pppg9_c" name="Protoporphyrinogen-IX" compartment="C_c">
        <notes>
          <html xmlns="http://www.w3.org/1999/xhtml"><p>FORMULA: C34H38N4O4</p></html>
        </notes>
      </species>
      <species id="M_pppi_c" name="Inorganic-triphosphate" compartment="C_c">
        <notes>
          <html xmlns="http://www.w3.org/1999/xhtml"><p>FORMULA: HO10P3</p></html>
        </notes>
      </species>
      <species id="M_pram_c" name="5-Phospho-beta-D-ribosylamine" compartment="C_c">
        <notes>
          <html xmlns="http://www.w3.org/1999/xhtml"><p>FORMULA: C5H11NO7P</p></html>
        </notes>
      </species>
      <species id="M_pran_c" name="N-5-Phospho-D-ribosyl-anthranilate" compartment="C_c">
        <notes>
          <html xmlns="http://www.w3.org/1999/xhtml"><p>FORMULA: C12H13NO9P</p></html>
        </notes>
      </species>
      <species id="M_prbamp_c" name="1-5-Phosphoribosyl-AMP" compartment="C_c">
        <notes>
          <html xmlns="http://www.w3.org/1999/xhtml"><p>FORMULA: C15H19N5O14P2</p></html>
        </notes>
      </species>
      <species id="M_prbatp_c" name="1-5-Phosphoribosyl-ATP" compartment="C_c">
        <notes>
          <html xmlns="http://www.w3.org/1999/xhtml"><p>FORMULA: C15H19N5O20P4</p></html>
        </notes>
      </species>
      <species id="M_pre2_c" name="Precorrin-2" compartment="C_c">
        <notes>
          <html xmlns="http://www.w3.org/1999/xhtml"><p>FORMULA: C42H40N4O16</p></html>
        </notes>
      </species>
      <species id="M_pre3a_c" name="Precorrin-3-A" compartment="C_c">
        <notes>
          <html xmlns="http://www.w3.org/1999/xhtml"><p>FORMULA: C43H43N4O16</p></html>
        </notes>
      </species>
      <species id="M_pre3b_c" name="Precorrin-3B" compartment="C_c">
        <notes>
          <html xmlns="http://www.w3.org/1999/xhtml"><p>FORMULA: C43H44N4O17</p></html>
        </notes>
      </species>
      <species id="M_pre4_c" name="Precorrin-4" compartment="C_c">
        <notes>
          <html xmlns="http://www.w3.org/1999/xhtml"><p>FORMULA: C44H44N4O17</p></html>
        </notes>
      </species>
      <species id="M_pre5_c" name="Precorrin-5" compartment="C_c">
        <notes>
          <html xmlns="http://www.w3.org/1999/xhtml"><p>FORMULA: C45H46N4O17</p></html>
        </notes>
      </species>
      <species id="M_pre6a_c" name="Precorrin-6A" compartment="C_c">
        <notes>
          <html xmlns="http://www.w3.org/1999/xhtml"><p>FORMULA: C44H47N4O16</p></html>
        </notes>
      </species>
      <species id="M_pre6b_c" name="Precorrin-6B" compartment="C_c">
        <notes>
          <html xmlns="http://www.w3.org/1999/xhtml"><p>FORMULA: C44H49N4O16</p></html>
        </notes>
      </species>
      <species id="M_pre8_c" name="Precorrin-8" compartment="C_c">
        <notes>
          <html xmlns="http://www.w3.org/1999/xhtml"><p>FORMULA: C45H53N4O14</p></html>
        </notes>
      </species>
      <species id="M_prephthACP_c" name="phthiocerol-precursor-bound-ACP" compartment="C_c">
        <notes>
          <html xmlns="http://www.w3.org/1999/xhtml"><p>FORMULA: C43H81N2O11PRS</p></html>
        </notes>
      </species>
      <species id="M_prephth_c" name="phthiocerol-precursor" compartment="C_c">
        <notes>
          <html xmlns="http://www.w3.org/1999/xhtml"><p>FORMULA: C32H61O5</p></html>
        </notes>
      </species>
      <species id="M_prephthcoa_c" name="phthiocerol-precursor-bound-coenzyme-A" compartment="C_c">
        <notes>
          <html xmlns="http://www.w3.org/1999/xhtml"><p>FORMULA: C53H92N7O20P3S</p></html>
        </notes>
      </species>
      <species id="M_prepphthACP_c" name="phenolic-phthiocerol-precursor-bound-ACP" compartment="C_c">
        <notes>
          <html xmlns="http://www.w3.org/1999/xhtml"><p>FORMULA: C46H79N2O12PRS</p></html>
        </notes>
      </species>
      <species id="M_prepphth_c" name="phenolic-phthiocerol-precursor" compartment="C_c">
        <notes>
          <html xmlns="http://www.w3.org/1999/xhtml"><p>FORMULA: C35H59O6</p></html>
        </notes>
      </species>
      <species id="M_prfp_c" name="1-5-Phosphoribosyl-5-5-phosphoribosylamino-methylideneaminoimidazole-4-carboxamide" compartment="C_c">
        <notes>
          <html xmlns="http://www.w3.org/1999/xhtml"><p>FORMULA: C15H21N5O15P2</p></html>
        </notes>
      </species>
      <species id="M_prlp_c" name="5-5-phospho-1-deoxyribulos-1-ylamino-methylideneamino-1-5-phosphoribosyl-imidazole-4-carboxamide" compartment="C_c">
        <notes>
          <html xmlns="http://www.w3.org/1999/xhtml"><p>FORMULA: C15H21N5O15P2</p></html>
        </notes>
      </species>
      <species id="M_pro_L_c" name="L-Proline" compartment="C_c">
        <notes>
          <html xmlns="http://www.w3.org/1999/xhtml"><p>FORMULA: C5H9NO2</p></html>
        </notes>
      </species>
      <species id="M_pro_L_e" name="L-Proline" compartment="C_e">
        <notes>
          <html xmlns="http://www.w3.org/1999/xhtml"><p>FORMULA: C5H9NO2</p></html>
        </notes>
      </species>
      <species id="M_prpp_c" name="5-Phospho-alpha-D-ribose-1-diphosphate" compartment="C_c">
        <notes>
          <html xmlns="http://www.w3.org/1999/xhtml"><p>FORMULA: C5H8O14P3</p></html>
        </notes>
      </species>
      <species id="M_ps160_c" name="phosphatidylserine-dihexadecanoyl-n-C160" compartment="C_c">
        <notes>
          <html xmlns="http://www.w3.org/1999/xhtml"><p>FORMULA: C38H73N1O10P1</p></html>
        </notes>
      </species>
      <species id="M_ps180_c" name="phosphatidylserine-dioctadecanoyl-n-C180" compartment="C_c">
        <notes>
          <html xmlns="http://www.w3.org/1999/xhtml"><p>FORMULA: C42H81N1O10P1</p></html>
        </notes>
      </species>
      <species id="M_psd5p_c" name="Pseudouridine-5-phosphate" compartment="C_c">
        <notes>
          <html xmlns="http://www.w3.org/1999/xhtml"><p>FORMULA: C9H11N2O9P</p></html>
        </notes>
      </species>
      <species id="M_pser_L_c" name="O-Phospho-L-serine" compartment="C_c">
        <notes>
          <html xmlns="http://www.w3.org/1999/xhtml"><p>FORMULA: C3H6NO6P</p></html>
        </notes>
      </species>
      <species id="M_ptcys_c" name="N-Pantothenoylcysteine" compartment="C_c">
        <notes>
          <html xmlns="http://www.w3.org/1999/xhtml"><p>FORMULA: C12H21N2O6S</p></html>
        </notes>
      </species>
      <species id="M_ptd1ino160190_c" name="phosphatidyl-1D-myo-inositol-C160-C190" compartment="C_c">
        <notes>
          <html xmlns="http://www.w3.org/1999/xhtml"><p>FORMULA: C44H84O13P</p></html>
        </notes>
      </species>
      <species id="M_ptd1ino160_c" name="phosphatidyl-1D-myo-inositol" compartment="C_c">
        <notes>
          <html xmlns="http://www.w3.org/1999/xhtml"><p>FORMULA: C41H78O13P</p></html>
        </notes>
      </species>
      <species id="M_ptrc_c" name="Putrescine" compartment="C_c">
        <notes>
          <html xmlns="http://www.w3.org/1999/xhtml"><p>FORMULA: C4H14N2</p></html>
        </notes>
      </species>
      <species id="M_ptth_c" name="Pantetheine" compartment="C_c">
        <notes>
          <html xmlns="http://www.w3.org/1999/xhtml"><p>FORMULA: C11H22N2O4S</p></html>
        </notes>
      </species>
      <species id="M_pyam5p_c" name="Pyridoxamine-5-phosphate" compartment="C_c">
        <notes>
          <html xmlns="http://www.w3.org/1999/xhtml"><p>FORMULA: C8H12N2O5P</p></html>
        </notes>
      </species>
      <species id="M_pydam_c" name="Pyridoxamine" compartment="C_c">
        <notes>
          <html xmlns="http://www.w3.org/1999/xhtml"><p>FORMULA: C8H13N2O2</p></html>
        </notes>
      </species>
      <species id="M_pydx5p_c" name="Pyridoxal-5-phosphate" compartment="C_c">
        <notes>
          <html xmlns="http://www.w3.org/1999/xhtml"><p>FORMULA: C8H8NO6P</p></html>
        </notes>
      </species>
      <species id="M_pydx_c" name="Pyridoxal" compartment="C_c">
        <notes>
          <html xmlns="http://www.w3.org/1999/xhtml"><p>FORMULA: C8H9NO3</p></html>
        </notes>
      </species>
      <species id="M_pydxn_c" name="Pyridoxine" compartment="C_c">
        <notes>
          <html xmlns="http://www.w3.org/1999/xhtml"><p>FORMULA: C8H11NO3</p></html>
        </notes>
      </species>
      <species id="M_pyr_c" name="Pyruvate" compartment="C_c">
        <notes>
          <html xmlns="http://www.w3.org/1999/xhtml"><p>FORMULA: C3H3O3</p></html>
        </notes>
      </species>
      <species id="M_pyr_e" name="Pyruvate" compartment="C_e">
        <notes>
          <html xmlns="http://www.w3.org/1999/xhtml"><p>FORMULA: C3H3O3</p></html>
        </notes>
      </species>
      <species id="M_q8_c" name="Ubiquinone-8" compartment="C_c">
        <notes>
          <html xmlns="http://www.w3.org/1999/xhtml"><p>FORMULA: C49H74O4</p></html>
        </notes>
      </species>
      <species id="M_q8h2_c" name="Ubiquinol-8" compartment="C_c">
        <notes>
          <html xmlns="http://www.w3.org/1999/xhtml"><p>FORMULA: C49H76O4</p></html>
        </notes>
      </species>
      <species id="M_q_c" name="Ubiquinone" compartment="C_c">
        <notes>
          <html xmlns="http://www.w3.org/1999/xhtml"><p>FORMULA: C14H18O4</p></html>
        </notes>
      </species>
      <species id="M_qh2_c" name="Ubiquinol" compartment="C_c">
        <notes>
          <html xmlns="http://www.w3.org/1999/xhtml"><p>FORMULA: C14H20O4</p></html>
        </notes>
      </species>
      <species id="M_quln_c" name="Quinolinate" compartment="C_c">
        <notes>
          <html xmlns="http://www.w3.org/1999/xhtml"><p>FORMULA: C7H3NO4</p></html>
        </notes>
      </species>
      <species id="M_r1p_c" name="alpha-D-Ribose-1-phosphate" compartment="C_c">
        <notes>
          <html xmlns="http://www.w3.org/1999/xhtml"><p>FORMULA: C5H9O8P</p></html>
        </notes>
      </species>
      <species id="M_r5p_c" name="alpha-D-Ribose-5-phosphate" compartment="C_c">
        <notes>
          <html xmlns="http://www.w3.org/1999/xhtml"><p>FORMULA: C5H9O8P</p></html>
        </notes>
      </species>
      <species id="M_ragund_c" name="rhamanosyl-N-acetylglucosamyl-undecaprenyl-diphosphate" compartment="C_c">
        <notes>
          <html xmlns="http://www.w3.org/1999/xhtml"><p>FORMULA: C69H113N1O16P2</p></html>
        </notes>
      </species>
      <species id="M_rbl_D_c" name="D-Ribulose" compartment="C_c">
        <notes>
          <html xmlns="http://www.w3.org/1999/xhtml"><p>FORMULA: C5H10O5</p></html>
        </notes>
      </species>
      <species id="M_rbl_L_c" name="L-Ribulose" compartment="C_c">
        <notes>
          <html xmlns="http://www.w3.org/1999/xhtml"><p>FORMULA: C5H10O5</p></html>
        </notes>
      </species>
      <species id="M_rdmbzi_c" name="N1-alpha-D-ribosyl-5-6-dimethylbenzimidazole" compartment="C_c">
        <notes>
          <html xmlns="http://www.w3.org/1999/xhtml"><p>FORMULA: C14H18N2O4</p></html>
        </notes>
      </species>
      <species id="M_rhcys_c" name="S-Ribosyl-L-homocysteine" compartment="C_c">
        <notes>
          <html xmlns="http://www.w3.org/1999/xhtml"><p>FORMULA: C9H17NO6S</p></html>
        </notes>
      </species>
      <species id="M_rib_D_c" name="D-Ribose" compartment="C_c">
        <notes>
          <html xmlns="http://www.w3.org/1999/xhtml"><p>FORMULA: C5H10O5</p></html>
        </notes>
      </species>
      <species id="M_rib_D_e" name="D-Ribose" compartment="C_e">
        <notes>
          <html xmlns="http://www.w3.org/1999/xhtml"><p>FORMULA: C5H10O5</p></html>
        </notes>
      </species>
      <species id="M_ribflv_c" name="Riboflavin" compartment="C_c">
        <notes>
          <html xmlns="http://www.w3.org/1999/xhtml"><p>FORMULA: C17H20N4O6</p></html>
        </notes>
      </species>
      <species id="M_rmyc_c" name="mycolate-compounds-all" compartment="C_c">
        <notes>
          <html xmlns="http://www.w3.org/1999/xhtml"><p>FORMULA: RMYC</p></html>
        </notes>
      </species>
      <species id="M_rppdima_c" name="rhamnose-phenol-phthiocerol-dimycocerosate-Mtb" compartment="C_c">
        <notes>
          <html xmlns="http://www.w3.org/1999/xhtml"><p>FORMULA: C105H198O10</p></html>
        </notes>
      </species>
      <species id="M_rrppdima_c" name="rhamnose-rhamnose-phenol-phthiocerol-dimycocerosate-Mtb" compartment="C_c">
        <notes>
          <html xmlns="http://www.w3.org/1999/xhtml"><p>FORMULA: C111H208O14</p></html>
        </notes>
      </species>
      <species id="M_ru5p_D_c" name="D-Ribulose-5-phosphate" compartment="C_c">
        <notes>
          <html xmlns="http://www.w3.org/1999/xhtml"><p>FORMULA: C5H9O8P</p></html>
        </notes>
      </species>
      <species id="M_ru5p_L_c" name="L-Ribulose-5-phosphate" compartment="C_c">
        <notes>
          <html xmlns="http://www.w3.org/1999/xhtml"><p>FORMULA: C5H9O8P</p></html>
        </notes>
      </species>
      <species id="M_s7p_c" name="Sedoheptulose-7-phosphate" compartment="C_c">
        <notes>
          <html xmlns="http://www.w3.org/1999/xhtml"><p>FORMULA: C7H13O10P</p></html>
        </notes>
      </species>
      <species id="M_s_c" name="Sulfur" compartment="C_c">
        <notes>
          <html xmlns="http://www.w3.org/1999/xhtml"><p>FORMULA: S</p></html>
        </notes>
      </species>
      <species id="M_salc_c" name="Salicylate" compartment="C_c">
        <notes>
          <html xmlns="http://www.w3.org/1999/xhtml"><p>FORMULA: C7H5O3</p></html>
        </notes>
      </species>
      <species id="M_sbzcoa_c" name="O-Succinylbenzoyl-CoA" compartment="C_c">
        <notes>
          <html xmlns="http://www.w3.org/1999/xhtml"><p>FORMULA: C32H39N7O20P3S</p></html>
        </notes>
      </species>
      <species id="M_scl2_c" name="sirohydrochlorin-2" compartment="C_c">
        <notes>
          <html xmlns="http://www.w3.org/1999/xhtml"><p>FORMULA: C42H38N4O16</p></html>
        </notes>
      </species>
      <species id="M_scl_c" name="sirohydrochlorin" compartment="C_c">
        <notes>
          <html xmlns="http://www.w3.org/1999/xhtml"><p>FORMULA: C42H39N4O16</p></html>
        </notes>
      </species>
      <species id="M_sdhlam_c" name="S-Succinyldihydrolipoamide" compartment="C_c">
        <notes>
          <html xmlns="http://www.w3.org/1999/xhtml"><p>FORMULA: C12H20NO4S2</p></html>
        </notes>
      </species>
      <species id="M_selcys_c" name="Selenocysteine" compartment="C_c">
        <notes>
          <html xmlns="http://www.w3.org/1999/xhtml"><p>FORMULA: C3H7NO2Se</p></html>
        </notes>
      </species>
      <species id="M_seln_c" name="Selenide" compartment="C_c">
        <notes>
          <html xmlns="http://www.w3.org/1999/xhtml"><p>FORMULA: HSe</p></html>
        </notes>
      </species>
      <species id="M_ser_D_c" name="D-Serine" compartment="C_c">
        <notes>
          <html xmlns="http://www.w3.org/1999/xhtml"><p>FORMULA: C3H7NO3</p></html>
        </notes>
      </species>
      <species id="M_ser_D_e" name="D-Serine" compartment="C_e">
        <notes>
          <html xmlns="http://www.w3.org/1999/xhtml"><p>FORMULA: C3H7NO3</p></html>
        </notes>
      </species>
      <species id="M_ser_L_c" name="L-Serine" compartment="C_c">
        <notes>
          <html xmlns="http://www.w3.org/1999/xhtml"><p>FORMULA: C3H7NO3</p></html>
        </notes>
      </species>
      <species id="M_ser_L_e" name="L-Serine" compartment="C_e">
        <notes>
          <html xmlns="http://www.w3.org/1999/xhtml"><p>FORMULA: C3H7NO3</p></html>
        </notes>
      </species>
      <species id="M_seramp_c" name="L-seryl-AMP" compartment="C_c">
        <notes>
          <html xmlns="http://www.w3.org/1999/xhtml"><p>FORMULA: C13H19N6O9P</p></html>
        </notes>
      </species>
      <species id="M_sheme_c" name="Siroheme" compartment="C_c">
        <notes>
          <html xmlns="http://www.w3.org/1999/xhtml"><p>FORMULA: C42H36FeN4O16</p></html>
        </notes>
      </species>
      <species id="M_skm5p_c" name="Shikimate-5-phosphate" compartment="C_c">
        <notes>
          <html xmlns="http://www.w3.org/1999/xhtml"><p>FORMULA: C7H8O8P</p></html>
        </notes>
      </species>
      <species id="M_skm_c" name="Shikimate" compartment="C_c">
        <notes>
          <html xmlns="http://www.w3.org/1999/xhtml"><p>FORMULA: C7H9O5</p></html>
        </notes>
      </species>
      <species id="M_skm_e" name="Shikimate" compartment="C_e">
        <notes>
          <html xmlns="http://www.w3.org/1999/xhtml"><p>FORMULA: C7H9O5</p></html>
        </notes>
      </species>
      <species id="M_sl1_c" name="sulfonated-tetra-acyl-trehalose" compartment="C_c">
        <notes>
          <html xmlns="http://www.w3.org/1999/xhtml"><p>FORMULA: C149H287O18S</p></html>
        </notes>
      </species>
      <species id="M_sl26da_c" name="N-Succinyl-LL-2-6-diaminoheptanedioate" compartment="C_c">
        <notes>
          <html xmlns="http://www.w3.org/1999/xhtml"><p>FORMULA: C11H16N2O7</p></html>
        </notes>
      </species>
      <species id="M_sl2a6o_c" name="N-Succinyl-2-L-amino-6-oxoheptanedioate" compartment="C_c">
        <notes>
          <html xmlns="http://www.w3.org/1999/xhtml"><p>FORMULA: C11H12NO8</p></html>
        </notes>
      </species>
      <species id="M_so3_c" name="Sulfite" compartment="C_c">
        <notes>
          <html xmlns="http://www.w3.org/1999/xhtml"><p>FORMULA: O3S</p></html>
        </notes>
      </species>
      <species id="M_so4_c" name="Sulfate" compartment="C_c">
        <notes>
          <html xmlns="http://www.w3.org/1999/xhtml"><p>FORMULA: O4S</p></html>
        </notes>
      </species>
      <species id="M_so4_e" name="Sulfate" compartment="C_e">
        <notes>
          <html xmlns="http://www.w3.org/1999/xhtml"><p>FORMULA: O4S</p></html>
        </notes>
      </species>
      <species id="M_spmd_c" name="Spermidine" compartment="C_c">
        <notes>
          <html xmlns="http://www.w3.org/1999/xhtml"><p>FORMULA: C7H22N3</p></html>
        </notes>
      </species>
      <species id="M_ssaltpp_c" name="Succinate-semialdehyde-thiamin-diphosphate-anion" compartment="C_c">
        <notes>
          <html xmlns="http://www.w3.org/1999/xhtml"><p>FORMULA: C16H21N4O10P2S</p></html>
        </notes>
      </species>
      <species id="M_stcoa_c" name="Stearoyl-CoA-n-C180CoA" compartment="C_c">
        <notes>
          <html xmlns="http://www.w3.org/1999/xhtml"><p>FORMULA: C39H66N7O17P3S</p></html>
        </notes>
      </species>
      <species id="M_sucarg_c" name="N2-Succinyl-L-arginine" compartment="C_c">
        <notes>
          <html xmlns="http://www.w3.org/1999/xhtml"><p>FORMULA: C10H17N4O5</p></html>
        </notes>
      </species>
      <species id="M_sucbz_c" name="o-Succinylbenzoate" compartment="C_c">
        <notes>
          <html xmlns="http://www.w3.org/1999/xhtml"><p>FORMULA: C11H8O5</p></html>
        </notes>
      </species>
      <species id="M_succ_c" name="Succinate" compartment="C_c">
        <notes>
          <html xmlns="http://www.w3.org/1999/xhtml"><p>FORMULA: C4H4O4</p></html>
        </notes>
      </species>
      <species id="M_succ_e" name="Succinate" compartment="C_e">
        <notes>
          <html xmlns="http://www.w3.org/1999/xhtml"><p>FORMULA: C4H4O4</p></html>
        </notes>
      </species>
      <species id="M_succoa_c" name="Succinyl-CoA" compartment="C_c">
        <notes>
          <html xmlns="http://www.w3.org/1999/xhtml"><p>FORMULA: C25H35N7O19P3S</p></html>
        </notes>
      </species>
      <species id="M_sucglu_c" name="N2-Succinyl-L-glutamate" compartment="C_c">
        <notes>
          <html xmlns="http://www.w3.org/1999/xhtml"><p>FORMULA: C9H10NO7</p></html>
        </notes>
      </species>
      <species id="M_sucgsa_c" name="N2-Succinyl-L-glutamate-5-semialdehyde" compartment="C_c">
        <notes>
          <html xmlns="http://www.w3.org/1999/xhtml"><p>FORMULA: C9H11NO6</p></html>
        </notes>
      </species>
      <species id="M_suchms_c" name="O-Succinyl-L-homoserine" compartment="C_c">
        <notes>
          <html xmlns="http://www.w3.org/1999/xhtml"><p>FORMULA: C8H12NO6</p></html>
        </notes>
      </species>
      <species id="M_sucorn_c" name="N2-Succinyl-L-ornithine" compartment="C_c">
        <notes>
          <html xmlns="http://www.w3.org/1999/xhtml"><p>FORMULA: C9H15N2O5</p></html>
        </notes>
      </species>
      <species id="M_sucsal_c" name="Succinic-semialdehyde" compartment="C_c">
        <notes>
          <html xmlns="http://www.w3.org/1999/xhtml"><p>FORMULA: C4H5O3</p></html>
        </notes>
      </species>
      <species id="M_tamhexc_c" name="tetra-methyl-hexacosanoate" compartment="C_c">
        <notes>
          <html xmlns="http://www.w3.org/1999/xhtml"><p>FORMULA: C30H59O2</p></html>
        </notes>
      </species>
      <species id="M_tamlgnc_c" name="tri-methyl-lignoceric-acid" compartment="C_c">
        <notes>
          <html xmlns="http://www.w3.org/1999/xhtml"><p>FORMULA: C28H55O2</p></html>
        </notes>
      </species>
      <species id="M_tamocta_c" name="tetra-methyl-octacosanoate" compartment="C_c">
        <notes>
          <html xmlns="http://www.w3.org/1999/xhtml"><p>FORMULA: C32H63O2</p></html>
        </notes>
      </species>
      <species id="M_tarab_D_c" name="tetra-arabinofuranoside" compartment="C_c">
        <notes>
          <html xmlns="http://www.w3.org/1999/xhtml"><p>FORMULA: C20H34O17</p></html>
        </notes>
      </species>
      <species id="M_tartr_L_c" name="L-tartrate" compartment="C_c">
        <notes>
          <html xmlns="http://www.w3.org/1999/xhtml"><p>FORMULA: C4H4O6</p></html>
        </notes>
      </species>
      <species id="M_tartr_L_e" name="L-tartrate" compartment="C_e">
        <notes>
          <html xmlns="http://www.w3.org/1999/xhtml"><p>FORMULA: C4H4O6</p></html>
        </notes>
      </species>
      <species id="M_tat_c" name="tetra-acyl-trehalose" compartment="C_c">
        <notes>
          <html xmlns="http://www.w3.org/1999/xhtml"><p>FORMULA: C149H288O15</p></html>
        </notes>
      </species>
      <species id="M_tcynt_c" name="Thiocyanate" compartment="C_c">
        <notes>
          <html xmlns="http://www.w3.org/1999/xhtml"><p>FORMULA: CNS</p></html>
        </notes>
      </species>
      <species id="M_tdcoa_c" name="Tetradecanoyl-CoA-n-C140CoA" compartment="C_c">
        <notes>
          <html xmlns="http://www.w3.org/1999/xhtml"><p>FORMULA: C35H58N7O17P3S</p></html>
        </notes>
      </species>
      <species id="M_tdm1_c" name="trehalose-dimycolate-alpha-mycolate-methoxymycolate" compartment="C_c">
        <notes>
          <html xmlns="http://www.w3.org/1999/xhtml"><p>FORMULA: C174H332O15</p></html>
        </notes>
      </species>
      <species id="M_tdm2_c" name="trehalose-dimycolate-alpha-mycolate-methoxymycolate" compartment="C_c">
        <notes>
          <html xmlns="http://www.w3.org/1999/xhtml"><p>FORMULA: C174H334O16</p></html>
        </notes>
      </species>
      <species id="M_tdm3_c" name="trehalose-dimycolate-alpha-mycolate-ketomycolate" compartment="C_c">
        <notes>
          <html xmlns="http://www.w3.org/1999/xhtml"><p>FORMULA: C176H338O16</p></html>
        </notes>
      </species>
      <species id="M_tdm4_c" name="trehalose-dimycolate-alpha-mycolate-methoxymycolate" compartment="C_c">
        <notes>
          <html xmlns="http://www.w3.org/1999/xhtml"><p>FORMULA: C176H336O15</p></html>
        </notes>
      </species>
      <species id="M_thdp_c" name="2-3-4-5-Tetrahydrodipicolinate" compartment="C_c">
        <notes>
          <html xmlns="http://www.w3.org/1999/xhtml"><p>FORMULA: C7H7NO4</p></html>
        </notes>
      </species>
      <species id="M_thf_c" name="5-6-7-8-Tetrahydrofolate" compartment="C_c">
        <notes>
          <html xmlns="http://www.w3.org/1999/xhtml"><p>FORMULA: C19H21N7O6</p></html>
        </notes>
      </species>
      <species id="M_thfglu_c" name="Tetrahydrofolyl-Glu-2" compartment="C_c">
        <notes>
          <html xmlns="http://www.w3.org/1999/xhtml"><p>FORMULA: C24H27N8O9</p></html>
        </notes>
      </species>
      <species id="M_thm_c" name="Thiamin" compartment="C_c">
        <notes>
          <html xmlns="http://www.w3.org/1999/xhtml"><p>FORMULA: C12H17N4OS</p></html>
        </notes>
      </species>
      <species id="M_thmmp_c" name="Thiamin-monophosphate" compartment="C_c">
        <notes>
          <html xmlns="http://www.w3.org/1999/xhtml"><p>FORMULA: C12H16N4O4PS</p></html>
        </notes>
      </species>
      <species id="M_thmpp_c" name="Thiamine-diphosphate" compartment="C_c">
        <notes>
          <html xmlns="http://www.w3.org/1999/xhtml"><p>FORMULA: C12H16N4O7P2S</p></html>
        </notes>
      </species>
      <species id="M_thr_L_c" name="L-Threonine" compartment="C_c">
        <notes>
          <html xmlns="http://www.w3.org/1999/xhtml"><p>FORMULA: C4H9NO3</p></html>
        </notes>
      </species>
      <species id="M_thr_L_e" name="L-Threonine" compartment="C_e">
        <notes>
          <html xmlns="http://www.w3.org/1999/xhtml"><p>FORMULA: C4H9NO3</p></html>
        </notes>
      </species>
      <species id="M_thym_c" name="Thymine" compartment="C_c">
        <notes>
          <html xmlns="http://www.w3.org/1999/xhtml"><p>FORMULA: C5H6N2O2</p></html>
        </notes>
      </species>
      <species id="M_thymd_c" name="Thymidine" compartment="C_c">
        <notes>
          <html xmlns="http://www.w3.org/1999/xhtml"><p>FORMULA: C10H14N2O5</p></html>
        </notes>
      </species>
      <species id="M_tmbhn_c" name="tri-methyl-behenic-acid" compartment="C_c">
        <notes>
          <html xmlns="http://www.w3.org/1999/xhtml"><p>FORMULA: C25H49O2</p></html>
        </notes>
      </species>
      <species id="M_tmha1_c" name="tetramycolyl-hexaarabinoside-tdm1-tdm2-tre-Mtb" compartment="C_c">
        <notes>
          <html xmlns="http://www.w3.org/1999/xhtml"><p>FORMULA: C360H684O40</p></html>
        </notes>
      </species>
      <species id="M_tmha2_c" name="tetramycolyl-hexaarabinoside-tdm1-tdm3-tre-Mtb" compartment="C_c">
        <notes>
          <html xmlns="http://www.w3.org/1999/xhtml"><p>FORMULA: C362H688O40</p></html>
        </notes>
      </species>
      <species id="M_tmha3_c" name="tetramycolyl-hexaarabinoside-tdm1-tdm4-tre-Mtb" compartment="C_c">
        <notes>
          <html xmlns="http://www.w3.org/1999/xhtml"><p>FORMULA: C362H686O39</p></html>
        </notes>
      </species>
      <species id="M_tmha4_c" name="tetramycolyl-hexaarabinoside-tdm2-tdm3-tre-Mtb" compartment="C_c">
        <notes>
          <html xmlns="http://www.w3.org/1999/xhtml"><p>FORMULA: C362H690O41</p></html>
        </notes>
      </species>
      <species id="M_tmha5_c" name="tetramycolyl-hexaarabinoside-tdm2-tdm4-tre-Mtb" compartment="C_c">
        <notes>
          <html xmlns="http://www.w3.org/1999/xhtml"><p>FORMULA: C362H688O40</p></html>
        </notes>
      </species>
      <species id="M_tmha6_c" name="tetramycolyl-hexaarabinoside-tdm3-tdm4-tre-Mtb" compartment="C_c">
        <notes>
          <html xmlns="http://www.w3.org/1999/xhtml"><p>FORMULA: C364H692O40</p></html>
        </notes>
      </species>
      <species id="M_tmhexc_c" name="tri-methyl-hexacosanoate" compartment="C_c">
        <notes>
          <html xmlns="http://www.w3.org/1999/xhtml"><p>FORMULA: C29H57O2</p></html>
        </notes>
      </species>
      <species id="M_tmlgnc_c" name="tri-methyl-lignoceric-acid" compartment="C_c">
        <notes>
          <html xmlns="http://www.w3.org/1999/xhtml"><p>FORMULA: C27H53O2</p></html>
        </notes>
      </species>
      <species id="M_trdox_c" name="Oxidized-thioredoxin" compartment="C_c">
        <notes>
          <html xmlns="http://www.w3.org/1999/xhtml"><p>FORMULA: X</p></html>
        </notes>
      </species>
      <species id="M_trdrd_c" name="Reduced-thioredoxin" compartment="C_c">
        <notes>
          <html xmlns="http://www.w3.org/1999/xhtml"><p>FORMULA: XH2</p></html>
        </notes>
      </species>
      <species id="M_tre6p_c" name="alpha-alpha-Trehalose-6-phosphate" compartment="C_c">
        <notes>
          <html xmlns="http://www.w3.org/1999/xhtml"><p>FORMULA: C12H21O14P</p></html>
        </notes>
      </species>
      <species id="M_tre_c" name="Trehalose" compartment="C_c">
        <notes>
          <html xmlns="http://www.w3.org/1999/xhtml"><p>FORMULA: C12H22O11</p></html>
        </notes>
      </species>
      <species id="M_tre_e" name="Trehalose" compartment="C_e">
        <notes>
          <html xmlns="http://www.w3.org/1999/xhtml"><p>FORMULA: C12H22O11</p></html>
        </notes>
      </species>
      <species id="M_tres_c" name="trehalose-2-sulfate" compartment="C_c">
        <notes>
          <html xmlns="http://www.w3.org/1999/xhtml"><p>FORMULA: C12H21O14S</p></html>
        </notes>
      </species>
      <species id="M_triat_c" name="tri-acyl-trehalose" compartment="C_c">
        <notes>
          <html xmlns="http://www.w3.org/1999/xhtml"><p>FORMULA: C75H142O14</p></html>
        </notes>
      </species>
      <species id="M_trnaala_c" name="tRNA-Ala" compartment="C_c">
        <notes>
          <html xmlns="http://www.w3.org/1999/xhtml"><p>FORMULA: R</p></html>
        </notes>
      </species>
      <species id="M_trnaglu_c" name="tRNA-Glu" compartment="C_c">
        <notes>
          <html xmlns="http://www.w3.org/1999/xhtml"><p>FORMULA: R</p></html>
        </notes>
      </species>
      <species id="M_trp_L_c" name="L-Tryptophan" compartment="C_c">
        <notes>
          <html xmlns="http://www.w3.org/1999/xhtml"><p>FORMULA: C11H12N2O2</p></html>
        </notes>
      </species>
      <species id="M_trp_L_e" name="L-Tryptophan" compartment="C_e">
        <notes>
          <html xmlns="http://www.w3.org/1999/xhtml"><p>FORMULA: C11H12N2O2</p></html>
        </notes>
      </species>
      <species id="M_tsul_c" name="Thiosulfate" compartment="C_c">
        <notes>
          <html xmlns="http://www.w3.org/1999/xhtml"><p>FORMULA: O3S2</p></html>
        </notes>
      </species>
      <species id="M_tsul_e" name="Thiosulfate" compartment="C_e">
        <notes>
          <html xmlns="http://www.w3.org/1999/xhtml"><p>FORMULA: O3S2</p></html>
        </notes>
      </species>
      <species id="M_ttc_c" name="tetracosanoate-n-C240" compartment="C_c">
        <notes>
          <html xmlns="http://www.w3.org/1999/xhtml"><p>FORMULA: C24H47O2</p></html>
        </notes>
      </species>
      <species id="M_ttdca_c" name="tetradecanoate-n-C140" compartment="C_c">
        <notes>
          <html xmlns="http://www.w3.org/1999/xhtml"><p>FORMULA: C14H27O2</p></html>
        </notes>
      </species>
      <species id="M_ttdca_e" name="tetradecanoate-n-C140" compartment="C_e">
        <notes>
          <html xmlns="http://www.w3.org/1999/xhtml"><p>FORMULA: C14H27O2</p></html>
        </notes>
      </species>
      <species id="M_tyr_L_c" name="L-Tyrosine" compartment="C_c">
        <notes>
          <html xmlns="http://www.w3.org/1999/xhtml"><p>FORMULA: C9H11NO3</p></html>
        </notes>
      </species>
      <species id="M_tyr_L_e" name="L-Tyrosine" compartment="C_e">
        <notes>
          <html xmlns="http://www.w3.org/1999/xhtml"><p>FORMULA: C9H11NO3</p></html>
        </notes>
      </species>
      <species id="M_uAgl_c" name="UDP-N-acetylmuramoyl-L-alanyl-D-glutamyl-L-lysine" compartment="C_c">
        <notes>
          <html xmlns="http://www.w3.org/1999/xhtml"><p>FORMULA: C34H52N7O24P2</p></html>
        </notes>
      </species>
      <species id="M_uAgla_c" name="UDP-N-acetylmuramoyl-L-alanyl-D-glutamyl-L-lysyl-D-alanyl-D-alanine" compartment="C_c">
        <notes>
          <html xmlns="http://www.w3.org/1999/xhtml"><p>FORMULA: C40H62N9O26P2</p></html>
        </notes>
      </species>
      <species id="M_uGgl_c" name="UDP-N-acetylmuramoyl-L-alanyl-gamma-D-glutamyl-L-lysine" compartment="C_c">
        <notes>
          <html xmlns="http://www.w3.org/1999/xhtml"><p>FORMULA: C34H52N7O24P2</p></html>
        </notes>
      </species>
      <species id="M_uGgla_c" name="UDP-N-acetylmuramoyl-L-alanyl-gamma-D-glutamyl-L-lysyl-D-alanyl-D-alanine" compartment="C_c">
        <notes>
          <html xmlns="http://www.w3.org/1999/xhtml"><p>FORMULA: C40H62N9O26P2</p></html>
        </notes>
      </species>
      <species id="M_uaAgla_c" name="Undecaprenyl-diphospho-N-acetylmuramoyl-L-alanyl-D-glutamyl-L-lysyl-D-alanyl-D-alanine" compartment="C_c">
        <notes>
          <html xmlns="http://www.w3.org/1999/xhtml"><p>FORMULA: C86H140N7O21P2</p></html>
        </notes>
      </species>
      <species id="M_uaGgla_c" name="Undecaprenyl-diphospho-N-acetylmuramoyl-L-alanyl-gamma-D-glutamyl-L-lysyl-D-alanyl-D-alanine" compartment="C_c">
        <notes>
          <html xmlns="http://www.w3.org/1999/xhtml"><p>FORMULA: C86H140N7O21P2</p></html>
        </notes>
      </species>
      <species id="M_uaaAgla_c" name="Undecaprenyl-diphospho-N-acetylmuramoyl-N-acetylglucosamine-L-alanyl-D-glutamyl-L-lysyl-D-alanyl-D-alanine" compartment="C_c">
        <notes>
          <html xmlns="http://www.w3.org/1999/xhtml"><p>FORMULA: C94H153N8O26P2</p></html>
        </notes>
      </species>
      <species id="M_uaaAgtla_c" name="Undecaprenyl-diphospho-N-acetylmuramoyl-N-acetylglucosamine-L-alanyl-D-glutaminyl-L-lysyl-D-alanyl-D-alanine" compartment="C_c">
        <notes>
          <html xmlns="http://www.w3.org/1999/xhtml"><p>FORMULA: C94H155N9O25P2</p></html>
        </notes>
      </species>
      <species id="M_uaaGgla_c" name="Undecaprenyl-diphospho-N-acetylmuramoyl-N-acetylglucosamine-L-alanyl-gamma-D-glutamyl-L-lysyl-D-alanyl-D-alanine" compartment="C_c">
        <notes>
          <html xmlns="http://www.w3.org/1999/xhtml"><p>FORMULA: C94H153N8O26P2</p></html>
        </notes>
      </species>
      <species id="M_uaaGgtla_c" name="Undecaprenyl-diphospho-N-acetylmuramoyl-N-acetylglucosamine-L-alanyl-D-isoglutaminyl-L-lysyl-D-alanyl-D-alanine" compartment="C_c">
        <notes>
          <html xmlns="http://www.w3.org/1999/xhtml"><p>FORMULA: C94H155N9O25P2</p></html>
        </notes>
      </species>
      <species id="M_uaagmda_c" name="Undecaprenyl-diphospho-N-acetylmuramoyl-N-acetylglucosamine-L-ala-D-glu-meso-2-6-diaminopimeloyl-D-ala-D-ala" compartment="C_c">
        <notes>
          <html xmlns="http://www.w3.org/1999/xhtml"><p>FORMULA: C95H152N8O28P2</p></html>
        </notes>
      </species>
      <species id="M_uaagtmda_c" name="Undecaprenyl-diphospho-N-acetylmuramoyl-N-acetylglucosamine-L-alanyl-D-glutaminyl-meso-2-6-diaminopimeloyl-D-alanyl-D-alanine" compartment="C_c">
        <notes>
          <html xmlns="http://www.w3.org/1999/xhtml"><p>FORMULA: C95H154N9O27P2</p></html>
        </notes>
      </species>
      <species id="M_uaccg_c" name="UDP-N-acetyl-3-O-1-carboxyvinyl-D-glucosamine" compartment="C_c">
        <notes>
          <html xmlns="http://www.w3.org/1999/xhtml"><p>FORMULA: C20H26N3O19P2</p></html>
        </notes>
      </species>
      <species id="M_uacgam_c" name="UDP-N-acetyl-D-glucosamine" compartment="C_c">
        <notes>
          <html xmlns="http://www.w3.org/1999/xhtml"><p>FORMULA: C17H25N3O17P2</p></html>
        </notes>
      </species>
      <species id="M_uagmda_c" name="Undecaprenyl-diphospho-N-acetylmuramoyl-L-alanyl-D-glutamyl-meso-2-6-diaminopimeloyl-D-alanyl-D-alanine" compartment="C_c">
        <notes>
          <html xmlns="http://www.w3.org/1999/xhtml"><p>FORMULA: C87H139N7O23P2</p></html>
        </notes>
      </species>
      <species id="M_uama_c" name="UDP-N-acetylmuramoyl-L-alanine" compartment="C_c">
        <notes>
          <html xmlns="http://www.w3.org/1999/xhtml"><p>FORMULA: C23H33N4O20P2</p></html>
        </notes>
      </species>
      <species id="M_uamag_c" name="UDP-N-acetylmuramoyl-L-alanyl-D-glutamate" compartment="C_c">
        <notes>
          <html xmlns="http://www.w3.org/1999/xhtml"><p>FORMULA: C28H39N5O23P2</p></html>
        </notes>
      </species>
      <species id="M_uamr_c" name="UDP-N-acetylmuramate" compartment="C_c">
        <notes>
          <html xmlns="http://www.w3.org/1999/xhtml"><p>FORMULA: C20H28N3O19P2</p></html>
        </notes>
      </species>
      <species id="M_udcpdp_c" name="Undecaprenyl-diphosphate" compartment="C_c">
        <notes>
          <html xmlns="http://www.w3.org/1999/xhtml"><p>FORMULA: C55H89O7P2</p></html>
        </notes>
      </species>
      <species id="M_udcpp_c" name="Undecaprenyl-phosphate" compartment="C_c">
        <notes>
          <html xmlns="http://www.w3.org/1999/xhtml"><p>FORMULA: C55H89O4P</p></html>
        </notes>
      </species>
      <species id="M_udp_c" name="UDP" compartment="C_c">
        <notes>
          <html xmlns="http://www.w3.org/1999/xhtml"><p>FORMULA: C9H11N2O12P2</p></html>
        </notes>
      </species>
      <species id="M_udpg_c" name="UDPglucose" compartment="C_c">
        <notes>
          <html xmlns="http://www.w3.org/1999/xhtml"><p>FORMULA: C15H22N2O17P2</p></html>
        </notes>
      </species>
      <species id="M_udpgal_c" name="UDPgalactose" compartment="C_c">
        <notes>
          <html xmlns="http://www.w3.org/1999/xhtml"><p>FORMULA: C15H22N2O17P2</p></html>
        </notes>
      </species>
      <species id="M_udpgalfur_c" name="UDP-D-galacto-1-4-furanose" compartment="C_c">
        <notes>
          <html xmlns="http://www.w3.org/1999/xhtml"><p>FORMULA: C15H22N2O17P2</p></html>
        </notes>
      </species>
      <species id="M_udpglcur_c" name="UDP-D-glucuronate" compartment="C_c">
        <notes>
          <html xmlns="http://www.w3.org/1999/xhtml"><p>FORMULA: C15H19N2O18P2</p></html>
        </notes>
      </species>
      <species id="M_ugagmda_c" name="Undecaprenyl-diphospho-N-glycolylmuramoyl-N-acetylglucosamine-L-ala-D-glu-meso-2-6-diaminopimeloyl-D-ala-D-ala" compartment="C_c">
        <notes>
          <html xmlns="http://www.w3.org/1999/xhtml"><p>FORMULA: C95H152N8O29P2</p></html>
        </notes>
      </species>
      <species id="M_ugggmda_c" name="Undecaprenyl-diphospho-N-glycolylmuramoyl-L-alanyl-D-glutamyl-meso-2-6-diaminopimeloyl-D-alanyl-D-alanine" compartment="C_c">
        <notes>
          <html xmlns="http://www.w3.org/1999/xhtml"><p>FORMULA: C87H139N7O24P2</p></html>
        </notes>
      </species>
      <species id="M_uggmd_c" name="UDP-N-glycolylmuramoyl-L-alanyl-D-gamma-glutamyl-meso-2-6-diaminopimelate" compartment="C_c">
        <notes>
          <html xmlns="http://www.w3.org/1999/xhtml"><p>FORMULA: C35H51N7O27P2</p></html>
        </notes>
      </species>
      <species id="M_uggmda_c" name="UDP-N-glycolylmuramoyl-L-alanyl-D-glutamyl-meso-2-6-diaminopimeloyl-D-alanyl-D-alanine" compartment="C_c">
        <notes>
          <html xmlns="http://www.w3.org/1999/xhtml"><p>FORMULA: C41H61N9O29P2</p></html>
        </notes>
      </species>
      <species id="M_ugma_c" name="UDP-N-glycolylmuramoyl-L-alanine" compartment="C_c">
        <notes>
          <html xmlns="http://www.w3.org/1999/xhtml"><p>FORMULA: C23H33N4O21P2</p></html>
        </notes>
      </species>
      <species id="M_ugmag_c" name="UDP-N-glycolylmuramoyl-L-alanyl-D-glutamate" compartment="C_c">
        <notes>
          <html xmlns="http://www.w3.org/1999/xhtml"><p>FORMULA: C28H39N5O24P2</p></html>
        </notes>
      </species>
      <species id="M_ugmd_c" name="UDP-N-acetylmuramoyl-L-alanyl-D-gamma-glutamyl-meso-2-6-diaminopimelate" compartment="C_c">
        <notes>
          <html xmlns="http://www.w3.org/1999/xhtml"><p>FORMULA: C35H51N7O26P2</p></html>
        </notes>
      </species>
      <species id="M_ugmda_c" name="UDP-N-acetylmuramoyl-L-alanyl-D-glutamyl-meso-2-6-diaminopimeloyl-D-alanyl-D-alanine" compartment="C_c">
        <notes>
          <html xmlns="http://www.w3.org/1999/xhtml"><p>FORMULA: C41H61N9O28P2</p></html>
        </notes>
      </species>
      <species id="M_ugmr_c" name="UDP-N-glycolylmuramate" compartment="C_c">
        <notes>
          <html xmlns="http://www.w3.org/1999/xhtml"><p>FORMULA: C20H28N3O20P2</p></html>
        </notes>
      </species>
      <species id="M_ump_c" name="UMP" compartment="C_c">
        <notes>
          <html xmlns="http://www.w3.org/1999/xhtml"><p>FORMULA: C9H11N2O9P</p></html>
        </notes>
      </species>
      <species id="M_unaga_c" name="Undecaprenyl-diphospho-N-acetyl-glucosamine" compartment="C_c">
        <notes>
          <html xmlns="http://www.w3.org/1999/xhtml"><p>FORMULA: C63H103NO12P2</p></html>
        </notes>
      </species>
      <species id="M_uppg1_c" name="Uroporphyrinogen-I" compartment="C_c">
        <notes>
          <html xmlns="http://www.w3.org/1999/xhtml"><p>FORMULA: C40H36N4O16</p></html>
        </notes>
      </species>
      <species id="M_uppg3_c" name="Uroporphyrinogen-III" compartment="C_c">
        <notes>
          <html xmlns="http://www.w3.org/1999/xhtml"><p>FORMULA: C40H36N4O16</p></html>
        </notes>
      </species>
      <species id="M_ura_c" name="Uracil" compartment="C_c">
        <notes>
          <html xmlns="http://www.w3.org/1999/xhtml"><p>FORMULA: C4H4N2O2</p></html>
        </notes>
      </species>
      <species id="M_urea_c" name="Urea" compartment="C_c">
        <notes>
          <html xmlns="http://www.w3.org/1999/xhtml"><p>FORMULA: CH4N2O</p></html>
        </notes>
      </species>
      <species id="M_uri_c" name="Uridine" compartment="C_c">
        <notes>
          <html xmlns="http://www.w3.org/1999/xhtml"><p>FORMULA: C9H12N2O6</p></html>
        </notes>
      </species>
      <species id="M_utp_c" name="UTP" compartment="C_c">
        <notes>
          <html xmlns="http://www.w3.org/1999/xhtml"><p>FORMULA: C9H11N2O15P3</p></html>
        </notes>
      </species>
      <species id="M_val_L_c" name="L-Valine" compartment="C_c">
        <notes>
          <html xmlns="http://www.w3.org/1999/xhtml"><p>FORMULA: C5H11NO2</p></html>
        </notes>
      </species>
      <species id="M_val_L_e" name="L-Valine" compartment="C_e">
        <notes>
          <html xmlns="http://www.w3.org/1999/xhtml"><p>FORMULA: C5H11NO2</p></html>
        </notes>
      </species>
      <species id="M_xan_c" name="Xanthine" compartment="C_c">
        <notes>
          <html xmlns="http://www.w3.org/1999/xhtml"><p>FORMULA: C5H4N4O2</p></html>
        </notes>
      </species>
      <species id="M_xmp_c" name="Xanthosine-5-phosphate" compartment="C_c">
        <notes>
          <html xmlns="http://www.w3.org/1999/xhtml"><p>FORMULA: C10H11N4O9P</p></html>
        </notes>
      </species>
      <species id="M_xtsn_c" name="Xanthosine" compartment="C_c">
        <notes>
          <html xmlns="http://www.w3.org/1999/xhtml"><p>FORMULA: C10H12N4O6</p></html>
        </notes>
      </species>
      <species id="M_xu5p_D_c" name="D-Xylulose-5-phosphate" compartment="C_c">
        <notes>
          <html xmlns="http://www.w3.org/1999/xhtml"><p>FORMULA: C5H9O8P</p></html>
        </notes>
      </species>
      <species id="M_xyl_D_c" name="D-Xylose" compartment="C_c">
        <notes>
          <html xmlns="http://www.w3.org/1999/xhtml"><p>FORMULA: C5H10O5</p></html>
        </notes>
      </species>
      <species id="M_xyl_D_e" name="D-Xylose" compartment="C_e">
        <notes>
          <html xmlns="http://www.w3.org/1999/xhtml"><p>FORMULA: C5H10O5</p></html>
        </notes>
      </species>
      <species id="M_xylu_D_c" name="D-Xylulose" compartment="C_c">
        <notes>
          <html xmlns="http://www.w3.org/1999/xhtml"><p>FORMULA: C5H10O5</p></html>
        </notes>
      </species>
      <species id="M_mcit_c" name="Methylcitrate" compartment="C_c">
        <notes>
          <html xmlns="http://www.w3.org/1999/xhtml"><p>FORMULA: C7H7O7</p></html>
        </notes>
      </species>
      <species id="M_micit_c" name="Methylisocitrate" compartment="C_c">
        <notes>
          <html xmlns="http://www.w3.org/1999/xhtml"><p>FORMULA: C7H7O7</p></html>
        </notes>
      </species>
      <species id="M_octa_e" name="octanoate-n-C80" compartment="C_e">
        <notes>
          <html xmlns="http://www.w3.org/1999/xhtml"><p>FORMULA: C8H15O2</p></html>
        </notes>
      </species>
      <species id="M_dca_e" name="Decanoate-n-C100" compartment="C_e">
        <notes>
          <html xmlns="http://www.w3.org/1999/xhtml"><p>FORMULA: C10H19O2</p></html>
        </notes>
      </species>
      <species id="M_ddca_e" name="Dodecanoate-n-C120" compartment="C_e">
        <notes>
          <html xmlns="http://www.w3.org/1999/xhtml"><p>FORMULA: C12H23O2</p></html>
        </notes>
      </species>
      <species id="M_hdcea_e" name="Hexadecenoate-n-C161" compartment="C_e">
        <notes>
          <html xmlns="http://www.w3.org/1999/xhtml"><p>FORMULA: C16H29O2</p></html>
        </notes>
      </species>
      <species id="M_ocdcea_e" name="octadecenoate-n-C181" compartment="C_e">
        <notes>
          <html xmlns="http://www.w3.org/1999/xhtml"><p>FORMULA: C18H33O2</p></html>
        </notes>
      </species>
      <species id="M_arach_e" name="Arachidic-acid" compartment="C_e">
        <notes>
          <html xmlns="http://www.w3.org/1999/xhtml"><p>FORMULA: C20H39O2</p></html>
        </notes>
      </species>
      <species id="M_ttc_e" name="tetracosanoate-n-C240" compartment="C_e">
        <notes>
          <html xmlns="http://www.w3.org/1999/xhtml"><p>FORMULA: C24H47O2</p></html>
        </notes>
      </species>
      <species id="M_hexc_e" name="hexacosanoate-n-C260" compartment="C_e">
        <notes>
          <html xmlns="http://www.w3.org/1999/xhtml"><p>FORMULA: C26H51O2</p></html>
        </notes>
      </species>
      <species id="M_4hba_b" name="4hba_b" compartment="C_e"/>
      <species id="M_acysbmn_b" name="acysbmn_b" compartment="C_e"/>
      <species id="M_ala_B_b" name="ala_B_b" compartment="C_e"/>
      <species id="M_ala_D_b" name="ala_D_b" compartment="C_e"/>
      <species id="M_ala_L_b" name="ala_L_b" compartment="C_e"/>
      <species id="M_arab_D_b" name="arab_D_b" compartment="C_e"/>
      <species id="M_arab_L_b" name="arab_L_b" compartment="C_e"/>
      <species id="M_arg_L_b" name="arg_L_b" compartment="C_e"/>
      <species id="M_asn_L_b" name="asn_L_b" compartment="C_e"/>
      <species id="M_asp_L_b" name="asp_L_b" compartment="C_e"/>
      <species id="M_atp_b" name="atp_b" compartment="C_e"/>
      <species id="M_bmn_b" name="bmn_b" compartment="C_e"/>
      <species id="M_ca2_b" name="ca2_b" compartment="C_e"/>
      <species id="M_chol_b" name="chol_b" compartment="C_e"/>
      <species id="M_cit_b" name="cit_b" compartment="C_e"/>
      <species id="M_cl_b" name="cl_b" compartment="C_e"/>
      <species id="M_co2_b" name="co2_b" compartment="C_e"/>
      <species id="M_co_b" name="co_b" compartment="C_e"/>
      <species id="M_coa_b" name="coa_b" compartment="C_e"/>
      <species id="M_cobalt2_b" name="cobalt2_b" compartment="C_e"/>
      <species id="M_crn_b" name="crn_b" compartment="C_e"/>
      <species id="M_cu2_b" name="cu2_b" compartment="C_e"/>
      <species id="M_cytd_b" name="cytd_b" compartment="C_e"/>
      <species id="M_etha_b" name="etha_b" compartment="C_e"/>
      <species id="M_fe2_b" name="fe2_b" compartment="C_e"/>
      <species id="M_fe3_b" name="fe3_b" compartment="C_e"/>
      <species id="M_fum_b" name="fum_b" compartment="C_e"/>
      <species id="M_gal_b" name="gal_b" compartment="C_e"/>
      <species id="M_gcald_b" name="gcald_b" compartment="C_e"/>
      <species id="M_glc_D_b" name="glc_D_b" compartment="C_e"/>
      <species id="M_glu_L_b" name="glu_L_b" compartment="C_e"/>
      <species id="M_gly_b" name="gly_b" compartment="C_e"/>
      <species id="M_glyb_b" name="glyb_b" compartment="C_e"/>
      <species id="M_glyc3p_b" name="glyc3p_b" compartment="C_e"/>
      <species id="M_glyc_b" name="glyc_b" compartment="C_e"/>
      <species id="M_gthrd_b" name="gthrd_b" compartment="C_e"/>
      <species id="M_h2_b" name="h2_b" compartment="C_e"/>
      <species id="M_h2co3_b" name="h2co3_b" compartment="C_e"/>
      <species id="M_h2o_b" name="h2o_b" compartment="C_e"/>
      <species id="M_h2s_b" name="h2s_b" compartment="C_e"/>
      <species id="M_h_b" name="h_b" compartment="C_e"/>
      <species id="M_hdca_b" name="hdca_b" compartment="C_e"/>
      <species id="M_his_L_b" name="his_L_b" compartment="C_e"/>
      <species id="M_id3acald_b" name="id3acald_b" compartment="C_e"/>
      <species id="M_ile_L_b" name="ile_L_b" compartment="C_e"/>
      <species id="M_k_b" name="k_b" compartment="C_e"/>
      <species id="M_lac_L_b" name="lac_L_b" compartment="C_e"/>
      <species id="M_lcts_b" name="lcts_b" compartment="C_e"/>
      <species id="M_leu_L_b" name="leu_L_b" compartment="C_e"/>
      <species id="M_lys_L_b" name="lys_L_b" compartment="C_e"/>
      <species id="M_mal_L_b" name="mal_L_b" compartment="C_e"/>
      <species id="M_malt_b" name="malt_b" compartment="C_e"/>
      <species id="M_malthp_b" name="malthp_b" compartment="C_e"/>
      <species id="M_meoh_b" name="meoh_b" compartment="C_e"/>
      <species id="M_met_L_b" name="met_L_b" compartment="C_e"/>
      <species id="M_mg2_b" name="mg2_b" compartment="C_e"/>
      <species id="M_na1_b" name="na1_b" compartment="C_e"/>
      <species id="M_nh4_b" name="nh4_b" compartment="C_e"/>
      <species id="M_no2_b" name="no2_b" compartment="C_e"/>
      <species id="M_no3_b" name="no3_b" compartment="C_e"/>
      <species id="M_no_b" name="no_b" compartment="C_e"/>
      <species id="M_o2_b" name="o2_b" compartment="C_e"/>
      <species id="M_ocdca_b" name="ocdca_b" compartment="C_e"/>
      <species id="M_orn_b" name="orn_b" compartment="C_e"/>
      <species id="M_pac_b" name="pac_b" compartment="C_e"/>
      <species id="M_pdima_b" name="pdima_b" compartment="C_e"/>
      <species id="M_phdca_b" name="phdca_b" compartment="C_e"/>
      <species id="M_phe_L_b" name="phe_L_b" compartment="C_e"/>
      <species id="M_pi_b" name="pi_b" compartment="C_e"/>
      <species id="M_ppa_b" name="ppa_b" compartment="C_e"/>
      <species id="M_ppdima_b" name="ppdima_b" compartment="C_e"/>
      <species id="M_pro_L_b" name="pro_L_b" compartment="C_e"/>
      <species id="M_pyr_b" name="pyr_b" compartment="C_e"/>
      <species id="M_rib_D_b" name="rib_D_b" compartment="C_e"/>
      <species id="M_ser_D_b" name="ser_D_b" compartment="C_e"/>
      <species id="M_ser_L_b" name="ser_L_b" compartment="C_e"/>
      <species id="M_skm_b" name="skm_b" compartment="C_e"/>
      <species id="M_so4_b" name="so4_b" compartment="C_e"/>
      <species id="M_succ_b" name="succ_b" compartment="C_e"/>
      <species id="M_tartr_L_b" name="tartr_L_b" compartment="C_e"/>
      <species id="M_thr_L_b" name="thr_L_b" compartment="C_e"/>
      <species id="M_tre_b" name="tre_b" compartment="C_e"/>
      <species id="M_trp_L_b" name="trp_L_b" compartment="C_e"/>
      <species id="M_tsul_b" name="tsul_b" compartment="C_e"/>
      <species id="M_ttdca_b" name="ttdca_b" compartment="C_e"/>
      <species id="M_tyr_L_b" name="tyr_L_b" compartment="C_e"/>
      <species id="M_val_L_b" name="val_L_b" compartment="C_e"/>
      <species id="M_xyl_D_b" name="xyl_D_b" compartment="C_e"/>
      <species id="M_octa_b" name="octa_b" compartment="C_e"/>
      <species id="M_dca_b" name="dca_b" compartment="C_e"/>
      <species id="M_ddca_b" name="ddca_b" compartment="C_e"/>
      <species id="M_hdcea_b" name="hdcea_b" compartment="C_e"/>
      <species id="M_ocdcea_b" name="ocdcea_b" compartment="C_e"/>
      <species id="M_arach_b" name="arach_b" compartment="C_e"/>
      <species id="M_ttc_b" name="ttc_b" compartment="C_e"/>
      <species id="M_hexc_b" name="hexc_b" compartment="C_e"/>
    </listOfSpecies>
    <listOfReactions>
      <reaction id="R_2AGPEAT160" name="2 acyl glycerophospho ethanolamine acyltransferase n C160 " reversible="false">
        <notes>
          <html xmlns="http://www.w3.org/1999/xhtml"><p>SUBSYSTEM: Fatty Acid Metabolism</p></html>
        </notes>
        <listOfReactants>
          <speciesReference species="M_2agpe160_c"/>
          <speciesReference species="M_atp_c"/>
          <speciesReference species="M_hdca_c"/>
        </listOfReactants>
        <listOfProducts>
          <speciesReference species="M_amp_c"/>
          <speciesReference species="M_pe160_c"/>
          <speciesReference species="M_ppi_c"/>
        </listOfProducts>
        <kineticLaw>
          <math xmlns="http://www.w3.org/1998/Math/MathML">
            <ci> FLUX_VALUE </ci>
          </math>
          <listOfParameters>
            <parameter id="LOWER_BOUND" value="0" units="mmol_per_gDW_per_hr"/>
            <parameter id="UPPER_BOUND" value="1000" units="mmol_per_gDW_per_hr"/>
            <parameter id="OBJECTIVE_COEFFICIENT" value="0"/>
            <parameter id="FLUX_VALUE" value="5" units="mmol_per_gDW_per_hr"/>
          </listOfParameters>
        </kineticLaw>
      </reaction>
      <reaction id="R_2AGPEAT180" name="2 acyl glycerophospho ethanolamine acyltransferase n C180 " reversible="false">
        <notes>
          <html xmlns="http://www.w3.org/1999/xhtml"><p>SUBSYSTEM: Fatty Acid Metabolism</p></html>
        </notes>
        <listOfReactants>
          <speciesReference species="M_2agpe180_c"/>
          <speciesReference species="M_atp_c"/>
          <speciesReference species="M_ocdca_c"/>
        </listOfReactants>
        <listOfProducts>
          <speciesReference species="M_amp_c"/>
          <speciesReference species="M_pe180_c"/>
          <speciesReference species="M_ppi_c"/>
        </listOfProducts>
        <kineticLaw>
          <math xmlns="http://www.w3.org/1998/Math/MathML">
            <ci> FLUX_VALUE </ci>
          </math>
          <listOfParameters>
            <parameter id="LOWER_BOUND" value="0" units="mmol_per_gDW_per_hr"/>
            <parameter id="UPPER_BOUND" value="1000" units="mmol_per_gDW_per_hr"/>
            <parameter id="OBJECTIVE_COEFFICIENT" value="0"/>
            <parameter id="FLUX_VALUE" value="5" units="mmol_per_gDW_per_hr"/>
          </listOfParameters>
        </kineticLaw>
      </reaction>
      <reaction id="R_4HBAt" name="4 hydroxy benzoate transport via diffusion extracellular to cytoplasm ">
        <notes>
          <html xmlns="http://www.w3.org/1999/xhtml"><p>SUBSYSTEM: Exchange</p></html>
        </notes>
        <listOfReactants>
          <speciesReference species="M_4hba_e"/>
        </listOfReactants>
        <listOfProducts>
          <speciesReference species="M_4hba_c"/>
        </listOfProducts>
        <kineticLaw>
          <math xmlns="http://www.w3.org/1998/Math/MathML">
            <ci> FLUX_VALUE </ci>
          </math>
          <listOfParameters>
            <parameter id="LOWER_BOUND" value="-1000" units="mmol_per_gDW_per_hr"/>
            <parameter id="UPPER_BOUND" value="1000" units="mmol_per_gDW_per_hr"/>
            <parameter id="OBJECTIVE_COEFFICIENT" value="0"/>
            <parameter id="FLUX_VALUE" value="0" units="mmol_per_gDW_per_hr"/>
          </listOfParameters>
        </kineticLaw>
      </reaction>
      <reaction id="R_4HTHRS" name="4 Hydroxy L threonine synthase" reversible="false">
        <notes>
          <html xmlns="http://www.w3.org/1999/xhtml"><p>GENE_ASSOCIATION: Rv1295</p><p>GENE_LIST: Rv1295</p><p>SUBSYSTEM: Cofactor Metabolism</p></html>
        </notes>
        <listOfReactants>
          <speciesReference species="M_h2o_c"/>
          <speciesReference species="M_phthr_c"/>
        </listOfReactants>
        <listOfProducts>
          <speciesReference species="M_4hthr_c"/>
          <speciesReference species="M_pi_c"/>
        </listOfProducts>
        <kineticLaw>
          <math xmlns="http://www.w3.org/1998/Math/MathML">
            <ci> FLUX_VALUE </ci>
          </math>
          <listOfParameters>
            <parameter id="LOWER_BOUND" value="0" units="mmol_per_gDW_per_hr"/>
            <parameter id="UPPER_BOUND" value="1000" units="mmol_per_gDW_per_hr"/>
            <parameter id="OBJECTIVE_COEFFICIENT" value="0"/>
            <parameter id="FLUX_VALUE" value="5" units="mmol_per_gDW_per_hr"/>
          </listOfParameters>
        </kineticLaw>
      </reaction>
      <reaction id="R_5DGLCNR" name="5 dehydro D gluconate reductase">
        <notes>
          <html xmlns="http://www.w3.org/1999/xhtml"><p>GENE_ASSOCIATION: Rv2573</p><p>GENE_LIST: Rv2573</p><p>SUBSYSTEM: Pantothenate and CoA Metabolism</p></html>
        </notes>
        <listOfReactants>
          <speciesReference species="M_5dglcn_c"/>
          <speciesReference species="M_h_c"/>
          <speciesReference species="M_nadph_c"/>
        </listOfReactants>
        <listOfProducts>
          <speciesReference species="M_glcn_c"/>
          <speciesReference species="M_nadp_c"/>
        </listOfProducts>
        <kineticLaw>
          <math xmlns="http://www.w3.org/1998/Math/MathML">
            <ci> FLUX_VALUE </ci>
          </math>
          <listOfParameters>
            <parameter id="LOWER_BOUND" value="-1000" units="mmol_per_gDW_per_hr"/>
            <parameter id="UPPER_BOUND" value="1000" units="mmol_per_gDW_per_hr"/>
            <parameter id="OBJECTIVE_COEFFICIENT" value="0"/>
            <parameter id="FLUX_VALUE" value="0" units="mmol_per_gDW_per_hr"/>
          </listOfParameters>
        </kineticLaw>
      </reaction>
      <reaction id="R_AACPS10" name="acyl acyl carrier protein synthetase  tuberculostearic acid " reversible="false">
        <notes>
          <html xmlns="http://www.w3.org/1999/xhtml"><p>GENE_ASSOCIATION: Rv3815c</p><p>GENE_LIST: Rv3815c</p><p>SUBSYSTEM: Fatty Acid Metabolism</p></html>
        </notes>
        <listOfReactants>
          <speciesReference species="M_ACP_c"/>
          <speciesReference species="M_atp_c"/>
          <speciesReference species="M_mocdca_c"/>
        </listOfReactants>
        <listOfProducts>
          <speciesReference species="M_amp_c"/>
          <speciesReference species="M_mstrACP_c"/>
          <speciesReference species="M_ppi_c"/>
        </listOfProducts>
        <kineticLaw>
          <math xmlns="http://www.w3.org/1998/Math/MathML">
            <ci> FLUX_VALUE </ci>
          </math>
          <listOfParameters>
            <parameter id="LOWER_BOUND" value="0" units="mmol_per_gDW_per_hr"/>
            <parameter id="UPPER_BOUND" value="1000" units="mmol_per_gDW_per_hr"/>
            <parameter id="OBJECTIVE_COEFFICIENT" value="0"/>
            <parameter id="FLUX_VALUE" value="5" units="mmol_per_gDW_per_hr"/>
          </listOfParameters>
        </kineticLaw>
      </reaction>
      <reaction id="R_AACPS11" name="acyl acyl carrier protein synthetase" reversible="false">
        <notes>
          <html xmlns="http://www.w3.org/1999/xhtml"><p>SUBSYSTEM: Membrane Metabolism</p></html>
        </notes>
        <listOfReactants>
          <speciesReference species="M_4hbz_c"/>
          <speciesReference species="M_ACP_c"/>
          <speciesReference species="M_atp_c"/>
        </listOfReactants>
        <listOfProducts>
          <speciesReference species="M_4hbzACP_c"/>
          <speciesReference species="M_amp_c"/>
          <speciesReference species="M_ppi_c"/>
        </listOfProducts>
        <kineticLaw>
          <math xmlns="http://www.w3.org/1998/Math/MathML">
            <ci> FLUX_VALUE </ci>
          </math>
          <listOfParameters>
            <parameter id="LOWER_BOUND" value="0" units="mmol_per_gDW_per_hr"/>
            <parameter id="UPPER_BOUND" value="1000" units="mmol_per_gDW_per_hr"/>
            <parameter id="OBJECTIVE_COEFFICIENT" value="0"/>
            <parameter id="FLUX_VALUE" value="5" units="mmol_per_gDW_per_hr"/>
          </listOfParameters>
        </kineticLaw>
      </reaction>
      <reaction id="R_AACPS3" name="acyl acyl carrier protein synthetase  n C160 " reversible="false">
        <notes>
          <html xmlns="http://www.w3.org/1999/xhtml"><p>SUBSYSTEM: Fatty Acid Metabolism</p></html>
        </notes>
        <listOfReactants>
          <speciesReference species="M_ACP_c"/>
          <speciesReference species="M_atp_c"/>
          <speciesReference species="M_hdca_c"/>
        </listOfReactants>
        <listOfProducts>
          <speciesReference species="M_amp_c"/>
          <speciesReference species="M_palmACP_c"/>
          <speciesReference species="M_ppi_c"/>
        </listOfProducts>
        <kineticLaw>
          <math xmlns="http://www.w3.org/1998/Math/MathML">
            <ci> FLUX_VALUE </ci>
          </math>
          <listOfParameters>
            <parameter id="LOWER_BOUND" value="0" units="mmol_per_gDW_per_hr"/>
            <parameter id="UPPER_BOUND" value="1000" units="mmol_per_gDW_per_hr"/>
            <parameter id="OBJECTIVE_COEFFICIENT" value="0"/>
            <parameter id="FLUX_VALUE" value="5" units="mmol_per_gDW_per_hr"/>
          </listOfParameters>
        </kineticLaw>
      </reaction>
      <reaction id="R_ABTA" name="4 aminobutyrate transaminase" reversible="false">
        <notes>
          <html xmlns="http://www.w3.org/1999/xhtml"><p>GENE_ASSOCIATION: ( Rv2589  or  Rv3290c )</p><p>GENE_LIST: Rv2589 Rv3290c</p><p>SUBSYSTEM: Glutamate Metabolism</p></html>
        </notes>
        <listOfReactants>
          <speciesReference species="M_4abut_c"/>
          <speciesReference species="M_akg_c"/>
        </listOfReactants>
        <listOfProducts>
          <speciesReference species="M_glu_L_c"/>
          <speciesReference species="M_sucsal_c"/>
        </listOfProducts>
        <kineticLaw>
          <math xmlns="http://www.w3.org/1998/Math/MathML">
            <ci> FLUX_VALUE </ci>
          </math>
          <listOfParameters>
            <parameter id="LOWER_BOUND" value="0" units="mmol_per_gDW_per_hr"/>
            <parameter id="UPPER_BOUND" value="1000" units="mmol_per_gDW_per_hr"/>
            <parameter id="OBJECTIVE_COEFFICIENT" value="0"/>
            <parameter id="FLUX_VALUE" value="5" units="mmol_per_gDW_per_hr"/>
          </listOfParameters>
        </kineticLaw>
      </reaction>
      <reaction id="R_ACACCT" name="acetyl CoAacetoacetyl CoA transferase" reversible="false">
        <notes>
          <html xmlns="http://www.w3.org/1999/xhtml"><p>SUBSYSTEM: Pyruvate Metabolism</p></html>
        </notes>
        <listOfReactants>
          <speciesReference species="M_acac_c"/>
          <speciesReference species="M_accoa_c"/>
        </listOfReactants>
        <listOfProducts>
          <speciesReference species="M_aacoa_c"/>
          <speciesReference species="M_ac_c"/>
        </listOfProducts>
        <kineticLaw>
          <math xmlns="http://www.w3.org/1998/Math/MathML">
            <ci> FLUX_VALUE </ci>
          </math>
          <listOfParameters>
            <parameter id="LOWER_BOUND" value="0" units="mmol_per_gDW_per_hr"/>
            <parameter id="UPPER_BOUND" value="1000" units="mmol_per_gDW_per_hr"/>
            <parameter id="OBJECTIVE_COEFFICIENT" value="0"/>
            <parameter id="FLUX_VALUE" value="5" units="mmol_per_gDW_per_hr"/>
          </listOfParameters>
        </kineticLaw>
      </reaction>
      <reaction id="R_ACACT1r" name="acetyl CoA C acetyltransferase">
        <notes>
          <html xmlns="http://www.w3.org/1999/xhtml"><p>GENE_ASSOCIATION: Rv1323</p><p>GENE_LIST: Rv1323</p><p>SUBSYSTEM: Pyruvate Metabolism</p></html>
        </notes>
        <listOfReactants>
          <speciesReference species="M_accoa_c" stoichiometry="2"/>
        </listOfReactants>
        <listOfProducts>
          <speciesReference species="M_aacoa_c"/>
          <speciesReference species="M_coa_c"/>
        </listOfProducts>
        <kineticLaw>
          <math xmlns="http://www.w3.org/1998/Math/MathML">
            <ci> FLUX_VALUE </ci>
          </math>
          <listOfParameters>
            <parameter id="LOWER_BOUND" value="-1000" units="mmol_per_gDW_per_hr"/>
            <parameter id="UPPER_BOUND" value="1000" units="mmol_per_gDW_per_hr"/>
            <parameter id="OBJECTIVE_COEFFICIENT" value="0"/>
            <parameter id="FLUX_VALUE" value="0" units="mmol_per_gDW_per_hr"/>
          </listOfParameters>
        </kineticLaw>
      </reaction>
      <reaction id="R_ACALDi" name="acetaldehyde dehydrogenase acetylating " reversible="false">
        <notes>
          <html xmlns="http://www.w3.org/1999/xhtml"><p>GENE_ASSOCIATION: Rv3535c</p><p>GENE_LIST: Rv3535c</p><p>SUBSYSTEM: Pyruvate Metabolism</p></html>
        </notes>
        <listOfReactants>
          <speciesReference species="M_acald_c"/>
          <speciesReference species="M_coa_c"/>
          <speciesReference species="M_nad_c"/>
        </listOfReactants>
        <listOfProducts>
          <speciesReference species="M_accoa_c"/>
          <speciesReference species="M_h_c"/>
          <speciesReference species="M_nadh_c"/>
        </listOfProducts>
        <kineticLaw>
          <math xmlns="http://www.w3.org/1998/Math/MathML">
            <ci> FLUX_VALUE </ci>
          </math>
          <listOfParameters>
            <parameter id="LOWER_BOUND" value="0" units="mmol_per_gDW_per_hr"/>
            <parameter id="UPPER_BOUND" value="1000" units="mmol_per_gDW_per_hr"/>
            <parameter id="OBJECTIVE_COEFFICIENT" value="0"/>
            <parameter id="FLUX_VALUE" value="5" units="mmol_per_gDW_per_hr"/>
          </listOfParameters>
        </kineticLaw>
      </reaction>
      <reaction id="R_ACBIPGT" name="Adenosyl cobinamide phosphate guanyltransferase" reversible="false">
        <notes>
          <html xmlns="http://www.w3.org/1999/xhtml"><p>GENE_ASSOCIATION: Rv0254c</p><p>GENE_LIST: Rv0254c</p><p>SUBSYSTEM: Cofactor Metabolism</p></html>
        </notes>
        <listOfReactants>
          <speciesReference species="M_adocbip_c"/>
          <speciesReference species="M_gtp_c"/>
          <speciesReference species="M_h_c"/>
        </listOfReactants>
        <listOfProducts>
          <speciesReference species="M_agdpcbi_c"/>
          <speciesReference species="M_ppi_c"/>
        </listOfProducts>
        <kineticLaw>
          <math xmlns="http://www.w3.org/1998/Math/MathML">
            <ci> FLUX_VALUE </ci>
          </math>
          <listOfParameters>
            <parameter id="LOWER_BOUND" value="0" units="mmol_per_gDW_per_hr"/>
            <parameter id="UPPER_BOUND" value="1000" units="mmol_per_gDW_per_hr"/>
            <parameter id="OBJECTIVE_COEFFICIENT" value="0"/>
            <parameter id="FLUX_VALUE" value="5" units="mmol_per_gDW_per_hr"/>
          </listOfParameters>
        </kineticLaw>
      </reaction>
      <reaction id="R_ACCC" name="Acyl CoA Carboxylase" reversible="false">
        <notes>
          <html xmlns="http://www.w3.org/1999/xhtml"><p>GENE_ASSOCIATION: Rv3280</p><p>GENE_LIST: Rv3280</p><p>SUBSYSTEM: Fatty Acid Metabolism</p></html>
        </notes>
        <listOfReactants>
          <speciesReference species="M_co2_c"/>
          <speciesReference species="M_hexccoa_c"/>
        </listOfReactants>
        <listOfProducts>
          <speciesReference species="M_chexccoa_c"/>
          <speciesReference species="M_h2o_c"/>
        </listOfProducts>
        <kineticLaw>
          <math xmlns="http://www.w3.org/1998/Math/MathML">
            <ci> FLUX_VALUE </ci>
          </math>
          <listOfParameters>
            <parameter id="LOWER_BOUND" value="0" units="mmol_per_gDW_per_hr"/>
            <parameter id="UPPER_BOUND" value="1000" units="mmol_per_gDW_per_hr"/>
            <parameter id="OBJECTIVE_COEFFICIENT" value="0"/>
            <parameter id="FLUX_VALUE" value="5" units="mmol_per_gDW_per_hr"/>
          </listOfParameters>
        </kineticLaw>
      </reaction>
      <reaction id="R_ACCOACr" name="acetyl CoA carboxylase reversible reaction">
        <notes>
          <html xmlns="http://www.w3.org/1999/xhtml"><p>GENE_ASSOCIATION: ( ( Rv0904c  and  Rv3280 )  or  ( Rv3280  and  Rv3281 ) )</p><p>GENE_LIST: Rv0904c Rv3280 Rv3281</p><p>SUBSYSTEM: Pyruvate Metabolism</p></html>
        </notes>
        <listOfReactants>
          <speciesReference species="M_accoa_c"/>
          <speciesReference species="M_atp_c"/>
          <speciesReference species="M_hco3_c"/>
        </listOfReactants>
        <listOfProducts>
          <speciesReference species="M_adp_c"/>
          <speciesReference species="M_h_c"/>
          <speciesReference species="M_malcoa_c"/>
          <speciesReference species="M_pi_c"/>
        </listOfProducts>
        <kineticLaw>
          <math xmlns="http://www.w3.org/1998/Math/MathML">
            <ci> FLUX_VALUE </ci>
          </math>
          <listOfParameters>
            <parameter id="LOWER_BOUND" value="-1000" units="mmol_per_gDW_per_hr"/>
            <parameter id="UPPER_BOUND" value="1000" units="mmol_per_gDW_per_hr"/>
            <parameter id="OBJECTIVE_COEFFICIENT" value="0"/>
            <parameter id="FLUX_VALUE" value="0" units="mmol_per_gDW_per_hr"/>
          </listOfParameters>
        </kineticLaw>
      </reaction>
      <reaction id="R_ACChex" name="Hexanoic Acid CoA Ligase" reversible="false">
        <notes>
          <html xmlns="http://www.w3.org/1999/xhtml"><p>GENE_ASSOCIATION: Rv3280</p><p>GENE_LIST: Rv3280</p><p>SUBSYSTEM: Fatty Acid Metabolism</p></html>
        </notes>
        <listOfReactants>
          <speciesReference species="M_coa_c"/>
          <speciesReference species="M_h_c"/>
          <speciesReference species="M_hexc_c"/>
        </listOfReactants>
        <listOfProducts>
          <speciesReference species="M_h2o_c"/>
          <speciesReference species="M_hexccoa_c"/>
        </listOfProducts>
        <kineticLaw>
          <math xmlns="http://www.w3.org/1998/Math/MathML">
            <ci> FLUX_VALUE </ci>
          </math>
          <listOfParameters>
            <parameter id="LOWER_BOUND" value="0" units="mmol_per_gDW_per_hr"/>
            <parameter id="UPPER_BOUND" value="1000" units="mmol_per_gDW_per_hr"/>
            <parameter id="OBJECTIVE_COEFFICIENT" value="0"/>
            <parameter id="FLUX_VALUE" value="5" units="mmol_per_gDW_per_hr"/>
          </listOfParameters>
        </kineticLaw>
      </reaction>
      <reaction id="R_ACGAMPM" name="phosphoacetylglucosamine mutase">
        <notes>
          <html xmlns="http://www.w3.org/1999/xhtml"><p>GENE_ASSOCIATION: Rv3441c</p><p>GENE_LIST: Rv3441c</p><p>SUBSYSTEM: Sugar Metabolism</p></html>
        </notes>
        <listOfReactants>
          <speciesReference species="M_acgam6p_c"/>
        </listOfReactants>
        <listOfProducts>
          <speciesReference species="M_acgam1p_c"/>
        </listOfProducts>
        <kineticLaw>
          <math xmlns="http://www.w3.org/1998/Math/MathML">
            <ci> FLUX_VALUE </ci>
          </math>
          <listOfParameters>
            <parameter id="LOWER_BOUND" value="-1000" units="mmol_per_gDW_per_hr"/>
            <parameter id="UPPER_BOUND" value="1000" units="mmol_per_gDW_per_hr"/>
            <parameter id="OBJECTIVE_COEFFICIENT" value="0"/>
            <parameter id="FLUX_VALUE" value="0" units="mmol_per_gDW_per_hr"/>
          </listOfParameters>
        </kineticLaw>
      </reaction>
      <reaction id="R_ACGAMT" name="UDP N acetylglucosamineundecaprenylphosphate N acetylglucosamine 1 phosphate transferase" reversible="false">
        <notes>
          <html xmlns="http://www.w3.org/1999/xhtml"><p>GENE_ASSOCIATION: Rv1302</p><p>GENE_LIST: Rv1302</p><p>SUBSYSTEM: Peptidoglycan Metabolism</p></html>
        </notes>
        <listOfReactants>
          <speciesReference species="M_uacgam_c"/>
          <speciesReference species="M_udcpp_c"/>
        </listOfReactants>
        <listOfProducts>
          <speciesReference species="M_ump_c"/>
          <speciesReference species="M_unaga_c"/>
        </listOfProducts>
        <kineticLaw>
          <math xmlns="http://www.w3.org/1998/Math/MathML">
            <ci> FLUX_VALUE </ci>
          </math>
          <listOfParameters>
            <parameter id="LOWER_BOUND" value="0" units="mmol_per_gDW_per_hr"/>
            <parameter id="UPPER_BOUND" value="1000" units="mmol_per_gDW_per_hr"/>
            <parameter id="OBJECTIVE_COEFFICIENT" value="0"/>
            <parameter id="FLUX_VALUE" value="5" units="mmol_per_gDW_per_hr"/>
          </listOfParameters>
        </kineticLaw>
      </reaction>
      <reaction id="R_ACGK" name="acetylglutamate kinase" reversible="false">
        <notes>
          <html xmlns="http://www.w3.org/1999/xhtml"><p>GENE_ASSOCIATION: Rv1654</p><p>GENE_LIST: Rv1654</p><p>SUBSYSTEM: Urea Cycle</p></html>
        </notes>
        <listOfReactants>
          <speciesReference species="M_acglu_c"/>
          <speciesReference species="M_atp_c"/>
        </listOfReactants>
        <listOfProducts>
          <speciesReference species="M_acg5p_c"/>
          <speciesReference species="M_adp_c"/>
        </listOfProducts>
        <kineticLaw>
          <math xmlns="http://www.w3.org/1998/Math/MathML">
            <ci> FLUX_VALUE </ci>
          </math>
          <listOfParameters>
            <parameter id="LOWER_BOUND" value="0" units="mmol_per_gDW_per_hr"/>
            <parameter id="UPPER_BOUND" value="1000" units="mmol_per_gDW_per_hr"/>
            <parameter id="OBJECTIVE_COEFFICIENT" value="0"/>
            <parameter id="FLUX_VALUE" value="5" units="mmol_per_gDW_per_hr"/>
          </listOfParameters>
        </kineticLaw>
      </reaction>
      <reaction id="R_ACGS" name="N acetylglutamate synthase" reversible="false">
        <notes>
          <html xmlns="http://www.w3.org/1999/xhtml"><p>GENE_ASSOCIATION: Rv1653</p><p>GENE_LIST: Rv1653</p><p>SUBSYSTEM: Urea Cycle</p></html>
        </notes>
        <listOfReactants>
          <speciesReference species="M_accoa_c"/>
          <speciesReference species="M_glu_L_c"/>
        </listOfReactants>
        <listOfProducts>
          <speciesReference species="M_acglu_c"/>
          <speciesReference species="M_coa_c"/>
          <speciesReference species="M_h_c"/>
        </listOfProducts>
        <kineticLaw>
          <math xmlns="http://www.w3.org/1998/Math/MathML">
            <ci> FLUX_VALUE </ci>
          </math>
          <listOfParameters>
            <parameter id="LOWER_BOUND" value="0" units="mmol_per_gDW_per_hr"/>
            <parameter id="UPPER_BOUND" value="1000" units="mmol_per_gDW_per_hr"/>
            <parameter id="OBJECTIVE_COEFFICIENT" value="0"/>
            <parameter id="FLUX_VALUE" value="5" units="mmol_per_gDW_per_hr"/>
          </listOfParameters>
        </kineticLaw>
      </reaction>
      <reaction id="R_ACHBS" name="2 aceto 2 hydroxybutanoate synthase" reversible="false">
        <notes>
          <html xmlns="http://www.w3.org/1999/xhtml"><p>SUBSYSTEM: Valine Leucine and Isoleucine Metabolism</p></html>
        </notes>
        <listOfReactants>
          <speciesReference species="M_2obut_c"/>
          <speciesReference species="M_h_c"/>
          <speciesReference species="M_pyr_c"/>
        </listOfReactants>
        <listOfProducts>
          <speciesReference species="M_2ahbut_c"/>
          <speciesReference species="M_co2_c"/>
        </listOfProducts>
        <kineticLaw>
          <math xmlns="http://www.w3.org/1998/Math/MathML">
            <ci> FLUX_VALUE </ci>
          </math>
          <listOfParameters>
            <parameter id="LOWER_BOUND" value="0" units="mmol_per_gDW_per_hr"/>
            <parameter id="UPPER_BOUND" value="1000" units="mmol_per_gDW_per_hr"/>
            <parameter id="OBJECTIVE_COEFFICIENT" value="0"/>
            <parameter id="FLUX_VALUE" value="5" units="mmol_per_gDW_per_hr"/>
          </listOfParameters>
        </kineticLaw>
      </reaction>
      <reaction id="R_ACKr" name="acetate kinase">
        <notes>
          <html xmlns="http://www.w3.org/1999/xhtml"><p>GENE_ASSOCIATION: Rv0409</p><p>GENE_LIST: Rv0409</p><p>SUBSYSTEM: Pyruvate Metabolism</p></html>
        </notes>
        <listOfReactants>
          <speciesReference species="M_ac_c"/>
          <speciesReference species="M_atp_c"/>
        </listOfReactants>
        <listOfProducts>
          <speciesReference species="M_actp_c"/>
          <speciesReference species="M_adp_c"/>
        </listOfProducts>
        <kineticLaw>
          <math xmlns="http://www.w3.org/1998/Math/MathML">
            <ci> FLUX_VALUE </ci>
          </math>
          <listOfParameters>
            <parameter id="LOWER_BOUND" value="-1000" units="mmol_per_gDW_per_hr"/>
            <parameter id="UPPER_BOUND" value="1000" units="mmol_per_gDW_per_hr"/>
            <parameter id="OBJECTIVE_COEFFICIENT" value="0"/>
            <parameter id="FLUX_VALUE" value="0" units="mmol_per_gDW_per_hr"/>
          </listOfParameters>
        </kineticLaw>
      </reaction>
      <reaction id="R_ACLS" name="acetolactate synthase" reversible="false">
        <notes>
          <html xmlns="http://www.w3.org/1999/xhtml"><p>GENE_ASSOCIATION: ( ( Rv1820  and  Rv3002c )  or  ( Rv3002c  and  Rv3509c )  or  ( Rv3002c  and  Rv3003c )  or  ( Rv3002c  and  Rv3470c )  or  ( Rv3002c  and  Rv3509c ) )</p><p>GENE_LIST: Rv1820 Rv3002c Rv3003c Rv3470c Rv3509c</p><p>SUBSYSTEM: Valine Leucine and Isoleucine Metabolism</p></html>
        </notes>
        <listOfReactants>
          <speciesReference species="M_h_c"/>
          <speciesReference species="M_pyr_c" stoichiometry="2"/>
        </listOfReactants>
        <listOfProducts>
          <speciesReference species="M_alac_S_c"/>
          <speciesReference species="M_co2_c"/>
        </listOfProducts>
        <kineticLaw>
          <math xmlns="http://www.w3.org/1998/Math/MathML">
            <ci> FLUX_VALUE </ci>
          </math>
          <listOfParameters>
            <parameter id="LOWER_BOUND" value="0" units="mmol_per_gDW_per_hr"/>
            <parameter id="UPPER_BOUND" value="1000" units="mmol_per_gDW_per_hr"/>
            <parameter id="OBJECTIVE_COEFFICIENT" value="0"/>
            <parameter id="FLUX_VALUE" value="5" units="mmol_per_gDW_per_hr"/>
          </listOfParameters>
        </kineticLaw>
      </reaction>
      <reaction id="R_ACODA" name="acetylornithine deacetylase" reversible="false">
        <notes>
          <html xmlns="http://www.w3.org/1999/xhtml"><p>SUBSYSTEM: Other Amino Acid Metabolism</p></html>
        </notes>
        <listOfReactants>
          <speciesReference species="M_acorn_c"/>
          <speciesReference species="M_h2o_c"/>
        </listOfReactants>
        <listOfProducts>
          <speciesReference species="M_ac_c"/>
          <speciesReference species="M_orn_c"/>
        </listOfProducts>
        <kineticLaw>
          <math xmlns="http://www.w3.org/1998/Math/MathML">
            <ci> FLUX_VALUE </ci>
          </math>
          <listOfParameters>
            <parameter id="LOWER_BOUND" value="0" units="mmol_per_gDW_per_hr"/>
            <parameter id="UPPER_BOUND" value="1000" units="mmol_per_gDW_per_hr"/>
            <parameter id="OBJECTIVE_COEFFICIENT" value="0"/>
            <parameter id="FLUX_VALUE" value="5" units="mmol_per_gDW_per_hr"/>
          </listOfParameters>
        </kineticLaw>
      </reaction>
      <reaction id="R_ACONT" name="aconitase">
        <notes>
          <html xmlns="http://www.w3.org/1999/xhtml"><p>GENE_ASSOCIATION: Rv1475c</p><p>GENE_LIST: Rv1475c</p><p>SUBSYSTEM: Citric Acid Cycle</p></html>
        </notes>
        <listOfReactants>
          <speciesReference species="M_cit_c"/>
        </listOfReactants>
        <listOfProducts>
          <speciesReference species="M_icit_c"/>
        </listOfProducts>
        <kineticLaw>
          <math xmlns="http://www.w3.org/1998/Math/MathML">
            <ci> FLUX_VALUE </ci>
          </math>
          <listOfParameters>
            <parameter id="LOWER_BOUND" value="-1000" units="mmol_per_gDW_per_hr"/>
            <parameter id="UPPER_BOUND" value="1000" units="mmol_per_gDW_per_hr"/>
            <parameter id="OBJECTIVE_COEFFICIENT" value="0"/>
            <parameter id="FLUX_VALUE" value="0" units="mmol_per_gDW_per_hr"/>
          </listOfParameters>
        </kineticLaw>
      </reaction>
      <reaction id="R_ACOTA" name="acetylornithine transaminase">
        <notes>
          <html xmlns="http://www.w3.org/1999/xhtml"><p>GENE_ASSOCIATION: Rv1655</p><p>GENE_LIST: Rv1655</p><p>SUBSYSTEM: Urea Cycle</p></html>
        </notes>
        <listOfReactants>
          <speciesReference species="M_acorn_c"/>
          <speciesReference species="M_akg_c"/>
        </listOfReactants>
        <listOfProducts>
          <speciesReference species="M_acg5sa_c"/>
          <speciesReference species="M_glu_L_c"/>
        </listOfProducts>
        <kineticLaw>
          <math xmlns="http://www.w3.org/1998/Math/MathML">
            <ci> FLUX_VALUE </ci>
          </math>
          <listOfParameters>
            <parameter id="LOWER_BOUND" value="-1000" units="mmol_per_gDW_per_hr"/>
            <parameter id="UPPER_BOUND" value="1000" units="mmol_per_gDW_per_hr"/>
            <parameter id="OBJECTIVE_COEFFICIENT" value="0"/>
            <parameter id="FLUX_VALUE" value="0" units="mmol_per_gDW_per_hr"/>
          </listOfParameters>
        </kineticLaw>
      </reaction>
      <reaction id="R_ACP1_FMN" name="acid phosphatase FMN " reversible="false">
        <notes>
          <html xmlns="http://www.w3.org/1999/xhtml"><p>GENE_ASSOCIATION: Rv3310</p><p>GENE_LIST: Rv3310</p><p>SUBSYSTEM: Riboflavin Metabolism</p></html>
        </notes>
        <listOfReactants>
          <speciesReference species="M_fmn_c"/>
          <speciesReference species="M_h2o_c"/>
        </listOfReactants>
        <listOfProducts>
          <speciesReference species="M_pi_c"/>
          <speciesReference species="M_ribflv_c"/>
        </listOfProducts>
        <kineticLaw>
          <math xmlns="http://www.w3.org/1998/Math/MathML">
            <ci> FLUX_VALUE </ci>
          </math>
          <listOfParameters>
            <parameter id="LOWER_BOUND" value="0" units="mmol_per_gDW_per_hr"/>
            <parameter id="UPPER_BOUND" value="1000" units="mmol_per_gDW_per_hr"/>
            <parameter id="OBJECTIVE_COEFFICIENT" value="0"/>
            <parameter id="FLUX_VALUE" value="5" units="mmol_per_gDW_per_hr"/>
          </listOfParameters>
        </kineticLaw>
      </reaction>
      <reaction id="R_ACPS1" name="acyl carrier protein synthase" reversible="false">
        <notes>
          <html xmlns="http://www.w3.org/1999/xhtml"><p>GENE_ASSOCIATION: Rv2523c</p><p>GENE_LIST: Rv2523c</p><p>SUBSYSTEM: Pantothenate and CoA Metabolism</p></html>
        </notes>
        <listOfReactants>
          <speciesReference species="M_apoACP_c"/>
          <speciesReference species="M_coa_c"/>
        </listOfReactants>
        <listOfProducts>
          <speciesReference species="M_ACP_c"/>
          <speciesReference species="M_h_c"/>
          <speciesReference species="M_pap_c"/>
        </listOfProducts>
        <kineticLaw>
          <math xmlns="http://www.w3.org/1998/Math/MathML">
            <ci> FLUX_VALUE </ci>
          </math>
          <listOfParameters>
            <parameter id="LOWER_BOUND" value="0" units="mmol_per_gDW_per_hr"/>
            <parameter id="UPPER_BOUND" value="1000" units="mmol_per_gDW_per_hr"/>
            <parameter id="OBJECTIVE_COEFFICIENT" value="0"/>
            <parameter id="FLUX_VALUE" value="5" units="mmol_per_gDW_per_hr"/>
          </listOfParameters>
        </kineticLaw>
      </reaction>
      <reaction id="R_ACS" name="acetyl CoA synthetase" reversible="false">
        <notes>
          <html xmlns="http://www.w3.org/1999/xhtml"><p>GENE_ASSOCIATION: Rv3667</p><p>GENE_LIST: Rv3667</p><p>SUBSYSTEM: Glycolysis</p></html>
        </notes>
        <listOfReactants>
          <speciesReference species="M_ac_c"/>
          <speciesReference species="M_atp_c"/>
          <speciesReference species="M_coa_c"/>
        </listOfReactants>
        <listOfProducts>
          <speciesReference species="M_accoa_c"/>
          <speciesReference species="M_amp_c"/>
          <speciesReference species="M_ppi_c"/>
        </listOfProducts>
        <kineticLaw>
          <math xmlns="http://www.w3.org/1998/Math/MathML">
            <ci> FLUX_VALUE </ci>
          </math>
          <listOfParameters>
            <parameter id="LOWER_BOUND" value="0" units="mmol_per_gDW_per_hr"/>
            <parameter id="UPPER_BOUND" value="1000" units="mmol_per_gDW_per_hr"/>
            <parameter id="OBJECTIVE_COEFFICIENT" value="0"/>
            <parameter id="FLUX_VALUE" value="5" units="mmol_per_gDW_per_hr"/>
          </listOfParameters>
        </kineticLaw>
      </reaction>
      <reaction id="R_ACS2" name="acetyl CoA synthase propionate " reversible="false">
        <notes>
          <html xmlns="http://www.w3.org/1999/xhtml"><p>GENE_ASSOCIATION: Rv3667</p><p>GENE_LIST: Rv3667</p><p>SUBSYSTEM: Sugar Metabolism</p></html>
        </notes>
        <listOfReactants>
          <speciesReference species="M_atp_c"/>
          <speciesReference species="M_coa_c"/>
          <speciesReference species="M_ppa_c"/>
        </listOfReactants>
        <listOfProducts>
          <speciesReference species="M_amp_c"/>
          <speciesReference species="M_ppcoa_c"/>
          <speciesReference species="M_ppi_c"/>
        </listOfProducts>
        <kineticLaw>
          <math xmlns="http://www.w3.org/1998/Math/MathML">
            <ci> FLUX_VALUE </ci>
          </math>
          <listOfParameters>
            <parameter id="LOWER_BOUND" value="0" units="mmol_per_gDW_per_hr"/>
            <parameter id="UPPER_BOUND" value="1000" units="mmol_per_gDW_per_hr"/>
            <parameter id="OBJECTIVE_COEFFICIENT" value="0"/>
            <parameter id="FLUX_VALUE" value="5" units="mmol_per_gDW_per_hr"/>
          </listOfParameters>
        </kineticLaw>
      </reaction>
      <reaction id="R_ACYSBMNt" name="acysbmn transport mtb ">
        <notes>
          <html xmlns="http://www.w3.org/1999/xhtml"><p>SUBSYSTEM: Transport</p></html>
        </notes>
        <listOfReactants>
          <speciesReference species="M_acysbmn_c"/>
        </listOfReactants>
        <listOfProducts>
          <speciesReference species="M_acysbmn_e"/>
        </listOfProducts>
        <kineticLaw>
          <math xmlns="http://www.w3.org/1998/Math/MathML">
            <ci> FLUX_VALUE </ci>
          </math>
          <listOfParameters>
            <parameter id="LOWER_BOUND" value="-1000" units="mmol_per_gDW_per_hr"/>
            <parameter id="UPPER_BOUND" value="1000" units="mmol_per_gDW_per_hr"/>
            <parameter id="OBJECTIVE_COEFFICIENT" value="0"/>
            <parameter id="FLUX_VALUE" value="0" units="mmol_per_gDW_per_hr"/>
          </listOfParameters>
        </kineticLaw>
      </reaction>
      <reaction id="R_ADA" name="Adenosine deaminase" reversible="false">
        <notes>
          <html xmlns="http://www.w3.org/1999/xhtml"><p>GENE_ASSOCIATION: Rv3313c</p><p>GENE_LIST: Rv3313c</p><p>SUBSYSTEM: Purine Metabolism</p></html>
        </notes>
        <listOfReactants>
          <speciesReference species="M_adn_c"/>
          <speciesReference species="M_h2o_c"/>
          <speciesReference species="M_h_c"/>
        </listOfReactants>
        <listOfProducts>
          <speciesReference species="M_ins_c"/>
          <speciesReference species="M_nh4_c"/>
        </listOfProducts>
        <kineticLaw>
          <math xmlns="http://www.w3.org/1998/Math/MathML">
            <ci> FLUX_VALUE </ci>
          </math>
          <listOfParameters>
            <parameter id="LOWER_BOUND" value="0" units="mmol_per_gDW_per_hr"/>
            <parameter id="UPPER_BOUND" value="1000" units="mmol_per_gDW_per_hr"/>
            <parameter id="OBJECTIVE_COEFFICIENT" value="0"/>
            <parameter id="FLUX_VALUE" value="5" units="mmol_per_gDW_per_hr"/>
          </listOfParameters>
        </kineticLaw>
      </reaction>
      <reaction id="R_ADCL" name="4 aminobenzoate synthase" reversible="false">
        <notes>
          <html xmlns="http://www.w3.org/1999/xhtml"><p>GENE_ASSOCIATION: Rv0812</p><p>GENE_LIST: Rv0812</p><p>SUBSYSTEM: Folate Metabolism</p></html>
        </notes>
        <listOfReactants>
          <speciesReference species="M_4adcho_c"/>
        </listOfReactants>
        <listOfProducts>
          <speciesReference species="M_4abz_c"/>
          <speciesReference species="M_h_c"/>
          <speciesReference species="M_pyr_c"/>
        </listOfProducts>
        <kineticLaw>
          <math xmlns="http://www.w3.org/1998/Math/MathML">
            <ci> FLUX_VALUE </ci>
          </math>
          <listOfParameters>
            <parameter id="LOWER_BOUND" value="0" units="mmol_per_gDW_per_hr"/>
            <parameter id="UPPER_BOUND" value="1000" units="mmol_per_gDW_per_hr"/>
            <parameter id="OBJECTIVE_COEFFICIENT" value="0"/>
            <parameter id="FLUX_VALUE" value="5" units="mmol_per_gDW_per_hr"/>
          </listOfParameters>
        </kineticLaw>
      </reaction>
      <reaction id="R_ADCPS1" name="adenosylcobinamide phosphate synthase" reversible="false">
        <notes>
          <html xmlns="http://www.w3.org/1999/xhtml"><p>GENE_ASSOCIATION: Rv2236c</p><p>GENE_LIST: Rv2236c</p><p>SUBSYSTEM: Cofactor Metabolism</p></html>
        </notes>
        <listOfReactants>
          <speciesReference species="M_adcobhex_c"/>
          <speciesReference species="M_appl_c"/>
          <speciesReference species="M_atp_c"/>
        </listOfReactants>
        <listOfProducts>
          <speciesReference species="M_adocbi_c"/>
          <speciesReference species="M_adp_c"/>
          <speciesReference species="M_h_c"/>
          <speciesReference species="M_pi_c"/>
        </listOfProducts>
        <kineticLaw>
          <math xmlns="http://www.w3.org/1998/Math/MathML">
            <ci> FLUX_VALUE </ci>
          </math>
          <listOfParameters>
            <parameter id="LOWER_BOUND" value="0" units="mmol_per_gDW_per_hr"/>
            <parameter id="UPPER_BOUND" value="1000" units="mmol_per_gDW_per_hr"/>
            <parameter id="OBJECTIVE_COEFFICIENT" value="0"/>
            <parameter id="FLUX_VALUE" value="5" units="mmol_per_gDW_per_hr"/>
          </listOfParameters>
        </kineticLaw>
      </reaction>
      <reaction id="R_ADCPS2" name="adenosylcobinamide phosphate synthase" reversible="false">
        <notes>
          <html xmlns="http://www.w3.org/1999/xhtml"><p>GENE_ASSOCIATION: ( Rv0254c  or  Rv2236c )</p><p>GENE_LIST: Rv0254c Rv2236c</p><p>SUBSYSTEM: Porphyrin Metabolism</p></html>
        </notes>
        <listOfReactants>
          <speciesReference species="M_adcobhex_c"/>
          <speciesReference species="M_applp_c"/>
          <speciesReference species="M_atp_c"/>
        </listOfReactants>
        <listOfProducts>
          <speciesReference species="M_adocbip_c"/>
          <speciesReference species="M_adp_c"/>
          <speciesReference species="M_h_c"/>
          <speciesReference species="M_pi_c"/>
        </listOfProducts>
        <kineticLaw>
          <math xmlns="http://www.w3.org/1998/Math/MathML">
            <ci> FLUX_VALUE </ci>
          </math>
          <listOfParameters>
            <parameter id="LOWER_BOUND" value="0" units="mmol_per_gDW_per_hr"/>
            <parameter id="UPPER_BOUND" value="1000" units="mmol_per_gDW_per_hr"/>
            <parameter id="OBJECTIVE_COEFFICIENT" value="0"/>
            <parameter id="FLUX_VALUE" value="5" units="mmol_per_gDW_per_hr"/>
          </listOfParameters>
        </kineticLaw>
      </reaction>
      <reaction id="R_ADCS" name="4 amino 4 deoxychorismate synthase" reversible="false">
        <notes>
          <html xmlns="http://www.w3.org/1999/xhtml"><p>GENE_ASSOCIATION: ( Rv0013  and  Rv1005c )</p><p>GENE_LIST: Rv0013 Rv1005c</p><p>SUBSYSTEM: Folate Metabolism</p></html>
        </notes>
        <listOfReactants>
          <speciesReference species="M_chor_c"/>
          <speciesReference species="M_gln_L_c"/>
        </listOfReactants>
        <listOfProducts>
          <speciesReference species="M_4adcho_c"/>
          <speciesReference species="M_glu_L_c"/>
        </listOfProducts>
        <kineticLaw>
          <math xmlns="http://www.w3.org/1998/Math/MathML">
            <ci> FLUX_VALUE </ci>
          </math>
          <listOfParameters>
            <parameter id="LOWER_BOUND" value="0" units="mmol_per_gDW_per_hr"/>
            <parameter id="UPPER_BOUND" value="1000" units="mmol_per_gDW_per_hr"/>
            <parameter id="OBJECTIVE_COEFFICIENT" value="0"/>
            <parameter id="FLUX_VALUE" value="5" units="mmol_per_gDW_per_hr"/>
          </listOfParameters>
        </kineticLaw>
      </reaction>
      <reaction id="R_ADCYRS" name="adenosylcobyric acid synthase glutamine hydrolysing " reversible="false">
        <notes>
          <html xmlns="http://www.w3.org/1999/xhtml"><p>GENE_ASSOCIATION: ( Rv2848c  or  ( Rv0255c  and  Rv3713 ) )</p><p>GENE_LIST: Rv0255c Rv2848c Rv3713</p><p>SUBSYSTEM: Porphyrin Metabolism</p></html>
        </notes>
        <listOfReactants>
          <speciesReference species="M_adcobdam_c"/>
          <speciesReference species="M_atp_c" stoichiometry="4"/>
          <speciesReference species="M_gln_L_c" stoichiometry="4"/>
          <speciesReference species="M_h2o_c" stoichiometry="4"/>
        </listOfReactants>
        <listOfProducts>
          <speciesReference species="M_adcobhex_c"/>
          <speciesReference species="M_adp_c" stoichiometry="4"/>
          <speciesReference species="M_glu_L_c" stoichiometry="4"/>
          <speciesReference species="M_h_c" stoichiometry="4"/>
          <speciesReference species="M_pi_c" stoichiometry="4"/>
        </listOfProducts>
        <kineticLaw>
          <math xmlns="http://www.w3.org/1998/Math/MathML">
            <ci> FLUX_VALUE </ci>
          </math>
          <listOfParameters>
            <parameter id="LOWER_BOUND" value="0" units="mmol_per_gDW_per_hr"/>
            <parameter id="UPPER_BOUND" value="1000" units="mmol_per_gDW_per_hr"/>
            <parameter id="OBJECTIVE_COEFFICIENT" value="0"/>
            <parameter id="FLUX_VALUE" value="5" units="mmol_per_gDW_per_hr"/>
          </listOfParameters>
        </kineticLaw>
      </reaction>
      <reaction id="R_ADK1" name="adenylate kinase">
        <notes>
          <html xmlns="http://www.w3.org/1999/xhtml"><p>GENE_ASSOCIATION: Rv0733</p><p>GENE_LIST: Rv0733</p><p>SUBSYSTEM: Purine Metabolism</p></html>
        </notes>
        <listOfReactants>
          <speciesReference species="M_amp_c"/>
          <speciesReference species="M_atp_c"/>
        </listOfReactants>
        <listOfProducts>
          <speciesReference species="M_adp_c" stoichiometry="2"/>
        </listOfProducts>
        <kineticLaw>
          <math xmlns="http://www.w3.org/1998/Math/MathML">
            <ci> FLUX_VALUE </ci>
          </math>
          <listOfParameters>
            <parameter id="LOWER_BOUND" value="-1000" units="mmol_per_gDW_per_hr"/>
            <parameter id="UPPER_BOUND" value="1000" units="mmol_per_gDW_per_hr"/>
            <parameter id="OBJECTIVE_COEFFICIENT" value="0"/>
            <parameter id="FLUX_VALUE" value="0" units="mmol_per_gDW_per_hr"/>
          </listOfParameters>
        </kineticLaw>
      </reaction>
      <reaction id="R_ADK2" name="adenylate kinase Inorganic triphosphate ">
        <notes>
          <html xmlns="http://www.w3.org/1999/xhtml"><p>GENE_ASSOCIATION: Rv0733</p><p>GENE_LIST: Rv0733</p><p>SUBSYSTEM: Purine Metabolism</p></html>
        </notes>
        <listOfReactants>
          <speciesReference species="M_amp_c"/>
          <speciesReference species="M_pppi_c"/>
        </listOfReactants>
        <listOfProducts>
          <speciesReference species="M_adp_c"/>
          <speciesReference species="M_ppi_c"/>
        </listOfProducts>
        <kineticLaw>
          <math xmlns="http://www.w3.org/1998/Math/MathML">
            <ci> FLUX_VALUE </ci>
          </math>
          <listOfParameters>
            <parameter id="LOWER_BOUND" value="-1000" units="mmol_per_gDW_per_hr"/>
            <parameter id="UPPER_BOUND" value="1000" units="mmol_per_gDW_per_hr"/>
            <parameter id="OBJECTIVE_COEFFICIENT" value="0"/>
            <parameter id="FLUX_VALUE" value="0" units="mmol_per_gDW_per_hr"/>
          </listOfParameters>
        </kineticLaw>
      </reaction>
      <reaction id="R_ADK3" name="adentylate kinase GTP ">
        <notes>
          <html xmlns="http://www.w3.org/1999/xhtml"><p>GENE_ASSOCIATION: Rv0733</p><p>GENE_LIST: Rv0733</p><p>SUBSYSTEM: Nucleotide Sugar Metabolism</p></html>
        </notes>
        <listOfReactants>
          <speciesReference species="M_amp_c"/>
          <speciesReference species="M_gtp_c"/>
        </listOfReactants>
        <listOfProducts>
          <speciesReference species="M_adp_c"/>
          <speciesReference species="M_gdp_c"/>
        </listOfProducts>
        <kineticLaw>
          <math xmlns="http://www.w3.org/1998/Math/MathML">
            <ci> FLUX_VALUE </ci>
          </math>
          <listOfParameters>
            <parameter id="LOWER_BOUND" value="-1000" units="mmol_per_gDW_per_hr"/>
            <parameter id="UPPER_BOUND" value="1000" units="mmol_per_gDW_per_hr"/>
            <parameter id="OBJECTIVE_COEFFICIENT" value="0"/>
            <parameter id="FLUX_VALUE" value="0" units="mmol_per_gDW_per_hr"/>
          </listOfParameters>
        </kineticLaw>
      </reaction>
      <reaction id="R_ADK4" name="adentylate kinase ITP ">
        <notes>
          <html xmlns="http://www.w3.org/1999/xhtml"><p>GENE_ASSOCIATION: Rv0733</p><p>GENE_LIST: Rv0733</p><p>SUBSYSTEM: Nucleotide Sugar Metabolism</p></html>
        </notes>
        <listOfReactants>
          <speciesReference species="M_amp_c"/>
          <speciesReference species="M_itp_c"/>
        </listOfReactants>
        <listOfProducts>
          <speciesReference species="M_adp_c"/>
          <speciesReference species="M_idp_c"/>
        </listOfProducts>
        <kineticLaw>
          <math xmlns="http://www.w3.org/1998/Math/MathML">
            <ci> FLUX_VALUE </ci>
          </math>
          <listOfParameters>
            <parameter id="LOWER_BOUND" value="-1000" units="mmol_per_gDW_per_hr"/>
            <parameter id="UPPER_BOUND" value="1000" units="mmol_per_gDW_per_hr"/>
            <parameter id="OBJECTIVE_COEFFICIENT" value="0"/>
            <parameter id="FLUX_VALUE" value="0" units="mmol_per_gDW_per_hr"/>
          </listOfParameters>
        </kineticLaw>
      </reaction>
      <reaction id="R_ADMDCr" name="Adenosylmethionine decarboxylase">
        <notes>
          <html xmlns="http://www.w3.org/1999/xhtml"><p>SUBSYSTEM: Methionine Metabolism</p></html>
        </notes>
        <listOfReactants>
          <speciesReference species="M_amet_c"/>
          <speciesReference species="M_h_c"/>
        </listOfReactants>
        <listOfProducts>
          <speciesReference species="M_ametam_c"/>
          <speciesReference species="M_co2_c"/>
        </listOfProducts>
        <kineticLaw>
          <math xmlns="http://www.w3.org/1998/Math/MathML">
            <ci> FLUX_VALUE </ci>
          </math>
          <listOfParameters>
            <parameter id="LOWER_BOUND" value="-1000" units="mmol_per_gDW_per_hr"/>
            <parameter id="UPPER_BOUND" value="1000" units="mmol_per_gDW_per_hr"/>
            <parameter id="OBJECTIVE_COEFFICIENT" value="0"/>
            <parameter id="FLUX_VALUE" value="0" units="mmol_per_gDW_per_hr"/>
          </listOfParameters>
        </kineticLaw>
      </reaction>
      <reaction id="R_ADNCYC" name="adenylate cyclase" reversible="false">
        <notes>
          <html xmlns="http://www.w3.org/1999/xhtml"><p>GENE_ASSOCIATION: ( ( ( Rv1318c  and  Rv1319c  and  Rv1320c )  or  Rv1625c  or  Rv1647  or  Rv1264 )  or  Rv2435c )</p><p>GENE_LIST: Rv1264 Rv1318c Rv1319c Rv1320c Rv1625c Rv1647 Rv2435c</p><p>SUBSYSTEM: Purine Metabolism</p></html>
        </notes>
        <listOfReactants>
          <speciesReference species="M_atp_c"/>
        </listOfReactants>
        <listOfProducts>
          <speciesReference species="M_camp_c"/>
          <speciesReference species="M_ppi_c"/>
        </listOfProducts>
        <kineticLaw>
          <math xmlns="http://www.w3.org/1998/Math/MathML">
            <ci> FLUX_VALUE </ci>
          </math>
          <listOfParameters>
            <parameter id="LOWER_BOUND" value="0" units="mmol_per_gDW_per_hr"/>
            <parameter id="UPPER_BOUND" value="1000" units="mmol_per_gDW_per_hr"/>
            <parameter id="OBJECTIVE_COEFFICIENT" value="0"/>
            <parameter id="FLUX_VALUE" value="5" units="mmol_per_gDW_per_hr"/>
          </listOfParameters>
        </kineticLaw>
      </reaction>
      <reaction id="R_ADNK1" name="adenosine kinase" reversible="false">
        <notes>
          <html xmlns="http://www.w3.org/1999/xhtml"><p>GENE_ASSOCIATION: Rv2202c</p><p>GENE_LIST: Rv2202c</p><p>SUBSYSTEM: Nucleotide Sugar Metabolism</p></html>
        </notes>
        <listOfReactants>
          <speciesReference species="M_adn_c"/>
          <speciesReference species="M_atp_c"/>
        </listOfReactants>
        <listOfProducts>
          <speciesReference species="M_adp_c"/>
          <speciesReference species="M_amp_c"/>
          <speciesReference species="M_h_c"/>
        </listOfProducts>
        <kineticLaw>
          <math xmlns="http://www.w3.org/1998/Math/MathML">
            <ci> FLUX_VALUE </ci>
          </math>
          <listOfParameters>
            <parameter id="LOWER_BOUND" value="0" units="mmol_per_gDW_per_hr"/>
            <parameter id="UPPER_BOUND" value="1000" units="mmol_per_gDW_per_hr"/>
            <parameter id="OBJECTIVE_COEFFICIENT" value="0"/>
            <parameter id="FLUX_VALUE" value="5" units="mmol_per_gDW_per_hr"/>
          </listOfParameters>
        </kineticLaw>
      </reaction>
      <reaction id="R_ADNK3" name="adenosine kinase" reversible="false">
        <notes>
          <html xmlns="http://www.w3.org/1999/xhtml"><p>GENE_ASSOCIATION: Rv2202c</p><p>GENE_LIST: Rv2202c</p><p>SUBSYSTEM: Nucleotide Sugar Metabolism</p></html>
        </notes>
        <listOfReactants>
          <speciesReference species="M_adn_c"/>
          <speciesReference species="M_gtp_c"/>
        </listOfReactants>
        <listOfProducts>
          <speciesReference species="M_amp_c"/>
          <speciesReference species="M_gdp_c"/>
          <speciesReference species="M_h_c"/>
        </listOfProducts>
        <kineticLaw>
          <math xmlns="http://www.w3.org/1998/Math/MathML">
            <ci> FLUX_VALUE </ci>
          </math>
          <listOfParameters>
            <parameter id="LOWER_BOUND" value="0" units="mmol_per_gDW_per_hr"/>
            <parameter id="UPPER_BOUND" value="1000" units="mmol_per_gDW_per_hr"/>
            <parameter id="OBJECTIVE_COEFFICIENT" value="0"/>
            <parameter id="FLUX_VALUE" value="5" units="mmol_per_gDW_per_hr"/>
          </listOfParameters>
        </kineticLaw>
      </reaction>
      <reaction id="R_ADNK4" name="adenosine kinase" reversible="false">
        <notes>
          <html xmlns="http://www.w3.org/1999/xhtml"><p>GENE_ASSOCIATION: Rv2202c</p><p>GENE_LIST: Rv2202c</p><p>SUBSYSTEM: Nucleotide Sugar Metabolism</p></html>
        </notes>
        <listOfReactants>
          <speciesReference species="M_adn_c"/>
          <speciesReference species="M_dgtp_c"/>
        </listOfReactants>
        <listOfProducts>
          <speciesReference species="M_amp_c"/>
          <speciesReference species="M_dgdp_c"/>
          <speciesReference species="M_h_c"/>
        </listOfProducts>
        <kineticLaw>
          <math xmlns="http://www.w3.org/1998/Math/MathML">
            <ci> FLUX_VALUE </ci>
          </math>
          <listOfParameters>
            <parameter id="LOWER_BOUND" value="0" units="mmol_per_gDW_per_hr"/>
            <parameter id="UPPER_BOUND" value="1000" units="mmol_per_gDW_per_hr"/>
            <parameter id="OBJECTIVE_COEFFICIENT" value="0"/>
            <parameter id="FLUX_VALUE" value="5" units="mmol_per_gDW_per_hr"/>
          </listOfParameters>
        </kineticLaw>
      </reaction>
      <reaction id="R_ADOCBIK" name="Adenosyl cobinamide kinase" reversible="false">
        <notes>
          <html xmlns="http://www.w3.org/1999/xhtml"><p>GENE_ASSOCIATION: Rv0254c</p><p>GENE_LIST: Rv0254c</p><p>SUBSYSTEM: Porphyrin Metabolism</p></html>
        </notes>
        <listOfReactants>
          <speciesReference species="M_adocbi_c"/>
          <speciesReference species="M_atp_c"/>
        </listOfReactants>
        <listOfProducts>
          <speciesReference species="M_adocbip_c"/>
          <speciesReference species="M_adp_c"/>
          <speciesReference species="M_h_c"/>
        </listOfProducts>
        <kineticLaw>
          <math xmlns="http://www.w3.org/1998/Math/MathML">
            <ci> FLUX_VALUE </ci>
          </math>
          <listOfParameters>
            <parameter id="LOWER_BOUND" value="0" units="mmol_per_gDW_per_hr"/>
            <parameter id="UPPER_BOUND" value="1000" units="mmol_per_gDW_per_hr"/>
            <parameter id="OBJECTIVE_COEFFICIENT" value="0"/>
            <parameter id="FLUX_VALUE" value="5" units="mmol_per_gDW_per_hr"/>
          </listOfParameters>
        </kineticLaw>
      </reaction>
      <reaction id="R_ADOCBLS" name="Adenosylcobalamin 5 phosphate synthase" reversible="false">
        <notes>
          <html xmlns="http://www.w3.org/1999/xhtml"><p>GENE_ASSOCIATION: Rv2208</p><p>GENE_LIST: Rv2208</p><p>SUBSYSTEM: Porphyrin Metabolism</p></html>
        </notes>
        <listOfReactants>
          <speciesReference species="M_agdpcbi_c"/>
          <speciesReference species="M_rdmbzi_c"/>
        </listOfReactants>
        <listOfProducts>
          <speciesReference species="M_adocbl_c"/>
          <speciesReference species="M_gmp_c"/>
          <speciesReference species="M_h_c"/>
        </listOfProducts>
        <kineticLaw>
          <math xmlns="http://www.w3.org/1998/Math/MathML">
            <ci> FLUX_VALUE </ci>
          </math>
          <listOfParameters>
            <parameter id="LOWER_BOUND" value="0" units="mmol_per_gDW_per_hr"/>
            <parameter id="UPPER_BOUND" value="1000" units="mmol_per_gDW_per_hr"/>
            <parameter id="OBJECTIVE_COEFFICIENT" value="0"/>
            <parameter id="FLUX_VALUE" value="5" units="mmol_per_gDW_per_hr"/>
          </listOfParameters>
        </kineticLaw>
      </reaction>
      <reaction id="R_ADPT" name="adenine phosphoribosyltransferase" reversible="false">
        <notes>
          <html xmlns="http://www.w3.org/1999/xhtml"><p>GENE_ASSOCIATION: Rv2584c</p><p>GENE_LIST: Rv2584c</p><p>SUBSYSTEM: Purine Metabolism</p></html>
        </notes>
        <listOfReactants>
          <speciesReference species="M_ade_c"/>
          <speciesReference species="M_prpp_c"/>
        </listOfReactants>
        <listOfProducts>
          <speciesReference species="M_amp_c"/>
          <speciesReference species="M_ppi_c"/>
        </listOfProducts>
        <kineticLaw>
          <math xmlns="http://www.w3.org/1998/Math/MathML">
            <ci> FLUX_VALUE </ci>
          </math>
          <listOfParameters>
            <parameter id="LOWER_BOUND" value="0" units="mmol_per_gDW_per_hr"/>
            <parameter id="UPPER_BOUND" value="1000" units="mmol_per_gDW_per_hr"/>
            <parameter id="OBJECTIVE_COEFFICIENT" value="0"/>
            <parameter id="FLUX_VALUE" value="5" units="mmol_per_gDW_per_hr"/>
          </listOfParameters>
        </kineticLaw>
      </reaction>
      <reaction id="R_ADSK" name="adenylyl sulfate kinase" reversible="false">
        <notes>
          <html xmlns="http://www.w3.org/1999/xhtml"><p>GENE_ASSOCIATION: ( Rv1285  and  Rv1286 )</p><p>GENE_LIST: Rv1285 Rv1286</p><p>SUBSYSTEM: Purine Metabolism</p></html>
        </notes>
        <listOfReactants>
          <speciesReference species="M_aps_c"/>
          <speciesReference species="M_atp_c"/>
        </listOfReactants>
        <listOfProducts>
          <speciesReference species="M_adp_c"/>
          <speciesReference species="M_h_c"/>
          <speciesReference species="M_paps_c"/>
        </listOfProducts>
        <kineticLaw>
          <math xmlns="http://www.w3.org/1998/Math/MathML">
            <ci> FLUX_VALUE </ci>
          </math>
          <listOfParameters>
            <parameter id="LOWER_BOUND" value="0" units="mmol_per_gDW_per_hr"/>
            <parameter id="UPPER_BOUND" value="1000" units="mmol_per_gDW_per_hr"/>
            <parameter id="OBJECTIVE_COEFFICIENT" value="0"/>
            <parameter id="FLUX_VALUE" value="5" units="mmol_per_gDW_per_hr"/>
          </listOfParameters>
        </kineticLaw>
      </reaction>
      <reaction id="R_ADSL1r" name="adenylsuccinate lyase">
        <notes>
          <html xmlns="http://www.w3.org/1999/xhtml"><p>GENE_ASSOCIATION: ( Rv0777  or  Rv0777  or  Rv0777  or  Rv0777 )</p><p>GENE_LIST: Rv0777</p><p>SUBSYSTEM: Purine Metabolism</p></html>
        </notes>
        <listOfReactants>
          <speciesReference species="M_dcamp_c"/>
        </listOfReactants>
        <listOfProducts>
          <speciesReference species="M_amp_c"/>
          <speciesReference species="M_fum_c"/>
        </listOfProducts>
        <kineticLaw>
          <math xmlns="http://www.w3.org/1998/Math/MathML">
            <ci> FLUX_VALUE </ci>
          </math>
          <listOfParameters>
            <parameter id="LOWER_BOUND" value="-1000" units="mmol_per_gDW_per_hr"/>
            <parameter id="UPPER_BOUND" value="1000" units="mmol_per_gDW_per_hr"/>
            <parameter id="OBJECTIVE_COEFFICIENT" value="0"/>
            <parameter id="FLUX_VALUE" value="0" units="mmol_per_gDW_per_hr"/>
          </listOfParameters>
        </kineticLaw>
      </reaction>
      <reaction id="R_ADSL2r" name="adenylosuccinate lyase">
        <notes>
          <html xmlns="http://www.w3.org/1999/xhtml"><p>GENE_ASSOCIATION: ( Rv0777  or  Rv0777  or  Rv0777  or  Rv0777 )</p><p>GENE_LIST: Rv0777</p><p>SUBSYSTEM: Purine Metabolism</p></html>
        </notes>
        <listOfReactants>
          <speciesReference species="M_25aics_c"/>
        </listOfReactants>
        <listOfProducts>
          <speciesReference species="M_aicar_c"/>
          <speciesReference species="M_fum_c"/>
        </listOfProducts>
        <kineticLaw>
          <math xmlns="http://www.w3.org/1998/Math/MathML">
            <ci> FLUX_VALUE </ci>
          </math>
          <listOfParameters>
            <parameter id="LOWER_BOUND" value="-1000" units="mmol_per_gDW_per_hr"/>
            <parameter id="UPPER_BOUND" value="1000" units="mmol_per_gDW_per_hr"/>
            <parameter id="OBJECTIVE_COEFFICIENT" value="0"/>
            <parameter id="FLUX_VALUE" value="0" units="mmol_per_gDW_per_hr"/>
          </listOfParameters>
        </kineticLaw>
      </reaction>
      <reaction id="R_ADSS" name="adenylosuccinate synthase" reversible="false">
        <notes>
          <html xmlns="http://www.w3.org/1999/xhtml"><p>GENE_ASSOCIATION: Rv0357c</p><p>GENE_LIST: Rv0357c</p><p>SUBSYSTEM: Purine Metabolism</p></html>
        </notes>
        <listOfReactants>
          <speciesReference species="M_asp_L_c"/>
          <speciesReference species="M_gtp_c"/>
          <speciesReference species="M_imp_c"/>
        </listOfReactants>
        <listOfProducts>
          <speciesReference species="M_dcamp_c"/>
          <speciesReference species="M_gdp_c"/>
          <speciesReference species="M_h_c" stoichiometry="2"/>
          <speciesReference species="M_pi_c"/>
        </listOfProducts>
        <kineticLaw>
          <math xmlns="http://www.w3.org/1998/Math/MathML">
            <ci> FLUX_VALUE </ci>
          </math>
          <listOfParameters>
            <parameter id="LOWER_BOUND" value="0" units="mmol_per_gDW_per_hr"/>
            <parameter id="UPPER_BOUND" value="1000" units="mmol_per_gDW_per_hr"/>
            <parameter id="OBJECTIVE_COEFFICIENT" value="0"/>
            <parameter id="FLUX_VALUE" value="5" units="mmol_per_gDW_per_hr"/>
          </listOfParameters>
        </kineticLaw>
      </reaction>
      <reaction id="R_AFE" name="arabinofuranosyl extension M tb " reversible="false">
        <notes>
          <html xmlns="http://www.w3.org/1999/xhtml"><p>GENE_ASSOCIATION: ( Rv3793  and  Rv3794  and  Rv3795 )</p><p>GENE_LIST: Rv3793 Rv3794 Rv3795</p><p>SUBSYSTEM: Membrane Metabolism</p></html>
        </notes>
        <listOfReactants>
          <speciesReference species="M_agalfragund_c"/>
          <speciesReference species="M_arabinan_c"/>
        </listOfReactants>
        <listOfProducts>
          <speciesReference species="M_arabinanagalfragund_c"/>
          <speciesReference species="M_h2o_c"/>
        </listOfProducts>
        <kineticLaw>
          <math xmlns="http://www.w3.org/1998/Math/MathML">
            <ci> FLUX_VALUE </ci>
          </math>
          <listOfParameters>
            <parameter id="LOWER_BOUND" value="0" units="mmol_per_gDW_per_hr"/>
            <parameter id="UPPER_BOUND" value="1000" units="mmol_per_gDW_per_hr"/>
            <parameter id="OBJECTIVE_COEFFICIENT" value="0"/>
            <parameter id="FLUX_VALUE" value="5" units="mmol_per_gDW_per_hr"/>
          </listOfParameters>
        </kineticLaw>
      </reaction>
      <reaction id="R_AFTA" name="arabinofuranosyl transferase M tb " reversible="false">
        <notes>
          <html xmlns="http://www.w3.org/1999/xhtml"><p>GENE_ASSOCIATION: Rv3792</p><p>GENE_LIST: Rv3792</p><p>SUBSYSTEM: Membrane Metabolism</p></html>
        </notes>
        <listOfReactants>
          <speciesReference species="M_decda_tb_c"/>
          <speciesReference species="M_galfragund_c"/>
        </listOfReactants>
        <listOfProducts>
          <speciesReference species="M_agalfragund_c"/>
          <speciesReference species="M_decd_tb_c"/>
        </listOfProducts>
        <kineticLaw>
          <math xmlns="http://www.w3.org/1998/Math/MathML">
            <ci> FLUX_VALUE </ci>
          </math>
          <listOfParameters>
            <parameter id="LOWER_BOUND" value="0" units="mmol_per_gDW_per_hr"/>
            <parameter id="UPPER_BOUND" value="1000" units="mmol_per_gDW_per_hr"/>
            <parameter id="OBJECTIVE_COEFFICIENT" value="0"/>
            <parameter id="FLUX_VALUE" value="5" units="mmol_per_gDW_per_hr"/>
          </listOfParameters>
        </kineticLaw>
      </reaction>
      <reaction id="R_AGDC" name="N acetylglucosamine 6 phosphate deacetylase" reversible="false">
        <notes>
          <html xmlns="http://www.w3.org/1999/xhtml"><p>GENE_ASSOCIATION: Rv3332</p><p>GENE_LIST: Rv3332</p><p>SUBSYSTEM: Sugar Metabolism</p></html>
        </notes>
        <listOfReactants>
          <speciesReference species="M_acgam6p_c"/>
          <speciesReference species="M_h2o_c"/>
        </listOfReactants>
        <listOfProducts>
          <speciesReference species="M_ac_c"/>
          <speciesReference species="M_gam6p_c"/>
        </listOfProducts>
        <kineticLaw>
          <math xmlns="http://www.w3.org/1998/Math/MathML">
            <ci> FLUX_VALUE </ci>
          </math>
          <listOfParameters>
            <parameter id="LOWER_BOUND" value="0" units="mmol_per_gDW_per_hr"/>
            <parameter id="UPPER_BOUND" value="1000" units="mmol_per_gDW_per_hr"/>
            <parameter id="OBJECTIVE_COEFFICIENT" value="0"/>
            <parameter id="FLUX_VALUE" value="5" units="mmol_per_gDW_per_hr"/>
          </listOfParameters>
        </kineticLaw>
      </reaction>
      <reaction id="R_AGMT" name="agmatinase" reversible="false">
        <notes>
          <html xmlns="http://www.w3.org/1999/xhtml"><p>SUBSYSTEM: Glutamate Metabolism</p></html>
        </notes>
        <listOfReactants>
          <speciesReference species="M_agm_c"/>
          <speciesReference species="M_h2o_c"/>
        </listOfReactants>
        <listOfProducts>
          <speciesReference species="M_ptrc_c"/>
          <speciesReference species="M_urea_c"/>
        </listOfProducts>
        <kineticLaw>
          <math xmlns="http://www.w3.org/1998/Math/MathML">
            <ci> FLUX_VALUE </ci>
          </math>
          <listOfParameters>
            <parameter id="LOWER_BOUND" value="0" units="mmol_per_gDW_per_hr"/>
            <parameter id="UPPER_BOUND" value="1000" units="mmol_per_gDW_per_hr"/>
            <parameter id="OBJECTIVE_COEFFICIENT" value="0"/>
            <parameter id="FLUX_VALUE" value="5" units="mmol_per_gDW_per_hr"/>
          </listOfParameters>
        </kineticLaw>
      </reaction>
      <reaction id="R_AGPAT160" name="1 hexadecanoyl sn glycerol 3 phosphate O acyltransferase n C160 " reversible="false">
        <notes>
          <html xmlns="http://www.w3.org/1999/xhtml"><p>GENE_ASSOCIATION: ( Rv2182c  or  Rv2483c )</p><p>GENE_LIST: Rv2182c Rv2483c</p><p>SUBSYSTEM: Fatty Acid Metabolism</p></html>
        </notes>
        <listOfReactants>
          <speciesReference species="M_1hdecg3p_c"/>
          <speciesReference species="M_palmACP_c"/>
        </listOfReactants>
        <listOfProducts>
          <speciesReference species="M_ACP_c"/>
          <speciesReference species="M_pa160_c"/>
        </listOfProducts>
        <kineticLaw>
          <math xmlns="http://www.w3.org/1998/Math/MathML">
            <ci> FLUX_VALUE </ci>
          </math>
          <listOfParameters>
            <parameter id="LOWER_BOUND" value="0" units="mmol_per_gDW_per_hr"/>
            <parameter id="UPPER_BOUND" value="1000" units="mmol_per_gDW_per_hr"/>
            <parameter id="OBJECTIVE_COEFFICIENT" value="0"/>
            <parameter id="FLUX_VALUE" value="5" units="mmol_per_gDW_per_hr"/>
          </listOfParameters>
        </kineticLaw>
      </reaction>
      <reaction id="R_AGPAT160190" name="1 hexadecanoyl sn glycerol 3 phosphate O acyltransferase" reversible="false">
        <notes>
          <html xmlns="http://www.w3.org/1999/xhtml"><p>GENE_ASSOCIATION: ( Rv2182c  or  Rv2483c )</p><p>GENE_LIST: Rv2182c Rv2483c</p><p>SUBSYSTEM: Fatty Acid Metabolism</p></html>
        </notes>
        <listOfReactants>
          <speciesReference species="M_1hdecg3p_c"/>
          <speciesReference species="M_mstrACP_c"/>
        </listOfReactants>
        <listOfProducts>
          <speciesReference species="M_ACP_c"/>
          <speciesReference species="M_pa160190_c"/>
        </listOfProducts>
        <kineticLaw>
          <math xmlns="http://www.w3.org/1998/Math/MathML">
            <ci> FLUX_VALUE </ci>
          </math>
          <listOfParameters>
            <parameter id="LOWER_BOUND" value="0" units="mmol_per_gDW_per_hr"/>
            <parameter id="UPPER_BOUND" value="1000" units="mmol_per_gDW_per_hr"/>
            <parameter id="OBJECTIVE_COEFFICIENT" value="0"/>
            <parameter id="FLUX_VALUE" value="5" units="mmol_per_gDW_per_hr"/>
          </listOfParameters>
        </kineticLaw>
      </reaction>
      <reaction id="R_AGPAT190" name="1 hexadecanoyl sn glycerol 3 phosphate O acyltransferase" reversible="false">
        <notes>
          <html xmlns="http://www.w3.org/1999/xhtml"><p>GENE_ASSOCIATION: ( Rv2483c  or  Rv2182c )</p><p>GENE_LIST: Rv2182c Rv2483c</p><p>SUBSYSTEM: Fatty Acid Metabolism</p></html>
        </notes>
        <listOfReactants>
          <speciesReference species="M_1msg3p_c"/>
          <speciesReference species="M_mstrACP_c"/>
        </listOfReactants>
        <listOfProducts>
          <speciesReference species="M_ACP_c"/>
          <speciesReference species="M_pa190190_c"/>
        </listOfProducts>
        <kineticLaw>
          <math xmlns="http://www.w3.org/1998/Math/MathML">
            <ci> FLUX_VALUE </ci>
          </math>
          <listOfParameters>
            <parameter id="LOWER_BOUND" value="0" units="mmol_per_gDW_per_hr"/>
            <parameter id="UPPER_BOUND" value="1000" units="mmol_per_gDW_per_hr"/>
            <parameter id="OBJECTIVE_COEFFICIENT" value="0"/>
            <parameter id="FLUX_VALUE" value="5" units="mmol_per_gDW_per_hr"/>
          </listOfParameters>
        </kineticLaw>
      </reaction>
      <reaction id="R_AGPR" name="N acetyl g glutamyl phosphate reductase">
        <notes>
          <html xmlns="http://www.w3.org/1999/xhtml"><p>GENE_ASSOCIATION: Rv1652</p><p>GENE_LIST: Rv1652</p><p>SUBSYSTEM: Urea Cycle</p></html>
        </notes>
        <listOfReactants>
          <speciesReference species="M_acg5sa_c"/>
          <speciesReference species="M_nadp_c"/>
          <speciesReference species="M_pi_c"/>
        </listOfReactants>
        <listOfProducts>
          <speciesReference species="M_acg5p_c"/>
          <speciesReference species="M_h_c"/>
          <speciesReference species="M_nadph_c"/>
        </listOfProducts>
        <kineticLaw>
          <math xmlns="http://www.w3.org/1998/Math/MathML">
            <ci> FLUX_VALUE </ci>
          </math>
          <listOfParameters>
            <parameter id="LOWER_BOUND" value="-1000" units="mmol_per_gDW_per_hr"/>
            <parameter id="UPPER_BOUND" value="1000" units="mmol_per_gDW_per_hr"/>
            <parameter id="OBJECTIVE_COEFFICIENT" value="0"/>
            <parameter id="FLUX_VALUE" value="0" units="mmol_per_gDW_per_hr"/>
          </listOfParameters>
        </kineticLaw>
      </reaction>
      <reaction id="R_AHC" name="adenosylhomocysteinase">
        <notes>
          <html xmlns="http://www.w3.org/1999/xhtml"><p>GENE_ASSOCIATION: Rv3248c</p><p>GENE_LIST: Rv3248c</p><p>SUBSYSTEM: Methionine Metabolism</p></html>
        </notes>
        <listOfReactants>
          <speciesReference species="M_ahcys_c"/>
          <speciesReference species="M_h2o_c"/>
        </listOfReactants>
        <listOfProducts>
          <speciesReference species="M_adn_c"/>
          <speciesReference species="M_hcys_L_c"/>
        </listOfProducts>
        <kineticLaw>
          <math xmlns="http://www.w3.org/1998/Math/MathML">
            <ci> FLUX_VALUE </ci>
          </math>
          <listOfParameters>
            <parameter id="LOWER_BOUND" value="-1000" units="mmol_per_gDW_per_hr"/>
            <parameter id="UPPER_BOUND" value="1000" units="mmol_per_gDW_per_hr"/>
            <parameter id="OBJECTIVE_COEFFICIENT" value="0"/>
            <parameter id="FLUX_VALUE" value="0" units="mmol_per_gDW_per_hr"/>
          </listOfParameters>
        </kineticLaw>
      </reaction>
      <reaction id="R_AHCYSNS" name="S adenosylhomocysteine nucleosidase" reversible="false">
        <notes>
          <html xmlns="http://www.w3.org/1999/xhtml"><p>GENE_ASSOCIATION: Rv0091</p><p>GENE_LIST: Rv0091</p><p>SUBSYSTEM: Methionine Metabolism</p></html>
        </notes>
        <listOfReactants>
          <speciesReference species="M_ahcys_c"/>
          <speciesReference species="M_h2o_c"/>
        </listOfReactants>
        <listOfProducts>
          <speciesReference species="M_ade_c"/>
          <speciesReference species="M_rhcys_c"/>
        </listOfProducts>
        <kineticLaw>
          <math xmlns="http://www.w3.org/1998/Math/MathML">
            <ci> FLUX_VALUE </ci>
          </math>
          <listOfParameters>
            <parameter id="LOWER_BOUND" value="0" units="mmol_per_gDW_per_hr"/>
            <parameter id="UPPER_BOUND" value="1000" units="mmol_per_gDW_per_hr"/>
            <parameter id="OBJECTIVE_COEFFICIENT" value="0"/>
            <parameter id="FLUX_VALUE" value="5" units="mmol_per_gDW_per_hr"/>
          </listOfParameters>
        </kineticLaw>
      </reaction>
      <reaction id="R_AHMMPS" name="4 amino 5 hydroxymethyl 2 methylpyrimidine synthetase" reversible="false">
        <notes>
          <html xmlns="http://www.w3.org/1999/xhtml"><p>GENE_ASSOCIATION: Rv0423c</p><p>GENE_LIST: Rv0423c</p><p>SUBSYSTEM: Cofactor Metabolism</p></html>
        </notes>
        <listOfReactants>
          <speciesReference species="M_air_c"/>
          <speciesReference species="M_h_c" stoichiometry="2"/>
        </listOfReactants>
        <listOfProducts>
          <speciesReference species="M_4ahmmp_c"/>
          <speciesReference species="M_gcald_c"/>
          <speciesReference species="M_pi_c"/>
        </listOfProducts>
        <kineticLaw>
          <math xmlns="http://www.w3.org/1998/Math/MathML">
            <ci> FLUX_VALUE </ci>
          </math>
          <listOfParameters>
            <parameter id="LOWER_BOUND" value="0" units="mmol_per_gDW_per_hr"/>
            <parameter id="UPPER_BOUND" value="1000" units="mmol_per_gDW_per_hr"/>
            <parameter id="OBJECTIVE_COEFFICIENT" value="0"/>
            <parameter id="FLUX_VALUE" value="5" units="mmol_per_gDW_per_hr"/>
          </listOfParameters>
        </kineticLaw>
      </reaction>
      <reaction id="R_AICART" name="phosphoribosylaminoimidazolecarboxamide formyltransferase">
        <notes>
          <html xmlns="http://www.w3.org/1999/xhtml"><p>GENE_ASSOCIATION: Rv0957</p><p>GENE_LIST: Rv0957</p><p>SUBSYSTEM: Purine Metabolism</p></html>
        </notes>
        <listOfReactants>
          <speciesReference species="M_10fthf_c"/>
          <speciesReference species="M_aicar_c"/>
        </listOfReactants>
        <listOfProducts>
          <speciesReference species="M_fprica_c"/>
          <speciesReference species="M_thf_c"/>
        </listOfProducts>
        <kineticLaw>
          <math xmlns="http://www.w3.org/1998/Math/MathML">
            <ci> FLUX_VALUE </ci>
          </math>
          <listOfParameters>
            <parameter id="LOWER_BOUND" value="-1000" units="mmol_per_gDW_per_hr"/>
            <parameter id="UPPER_BOUND" value="1000" units="mmol_per_gDW_per_hr"/>
            <parameter id="OBJECTIVE_COEFFICIENT" value="0"/>
            <parameter id="FLUX_VALUE" value="0" units="mmol_per_gDW_per_hr"/>
          </listOfParameters>
        </kineticLaw>
      </reaction>
      <reaction id="R_AICART2" name="phosphoribosylaminoimidazolecarboxamide formyltransferase 2">
        <notes>
          <html xmlns="http://www.w3.org/1999/xhtml"><p>SUBSYSTEM: Purine Metabolism</p></html>
        </notes>
        <listOfReactants>
          <speciesReference species="M_aicar_c"/>
          <speciesReference species="M_atp_c"/>
          <speciesReference species="M_for_c"/>
        </listOfReactants>
        <listOfProducts>
          <speciesReference species="M_adp_c"/>
          <speciesReference species="M_fprica_c"/>
          <speciesReference species="M_pi_c"/>
        </listOfProducts>
        <kineticLaw>
          <math xmlns="http://www.w3.org/1998/Math/MathML">
            <ci> FLUX_VALUE </ci>
          </math>
          <listOfParameters>
            <parameter id="LOWER_BOUND" value="-1000" units="mmol_per_gDW_per_hr"/>
            <parameter id="UPPER_BOUND" value="1000" units="mmol_per_gDW_per_hr"/>
            <parameter id="OBJECTIVE_COEFFICIENT" value="0"/>
            <parameter id="FLUX_VALUE" value="0" units="mmol_per_gDW_per_hr"/>
          </listOfParameters>
        </kineticLaw>
      </reaction>
      <reaction id="R_AIRC2" name="phosphoribosylaminoimidazole carboxylase" reversible="false">
        <notes>
          <html xmlns="http://www.w3.org/1999/xhtml"><p>SUBSYSTEM: Nucleotide Sugar Metabolism</p></html>
        </notes>
        <listOfReactants>
          <speciesReference species="M_air_c"/>
          <speciesReference species="M_atp_c"/>
          <speciesReference species="M_hco3_c"/>
        </listOfReactants>
        <listOfProducts>
          <speciesReference species="M_5caiz_c"/>
          <speciesReference species="M_adp_c"/>
          <speciesReference species="M_h_c"/>
          <speciesReference species="M_pi_c"/>
        </listOfProducts>
        <kineticLaw>
          <math xmlns="http://www.w3.org/1998/Math/MathML">
            <ci> FLUX_VALUE </ci>
          </math>
          <listOfParameters>
            <parameter id="LOWER_BOUND" value="0" units="mmol_per_gDW_per_hr"/>
            <parameter id="UPPER_BOUND" value="1000" units="mmol_per_gDW_per_hr"/>
            <parameter id="OBJECTIVE_COEFFICIENT" value="0"/>
            <parameter id="FLUX_VALUE" value="5" units="mmol_per_gDW_per_hr"/>
          </listOfParameters>
        </kineticLaw>
      </reaction>
      <reaction id="R_AIRC3" name="phosphoribosylaminoimidazole carboxylase mutase rxn ">
        <notes>
          <html xmlns="http://www.w3.org/1999/xhtml"><p>SUBSYSTEM: Nucleotide Sugar Metabolism</p></html>
        </notes>
        <listOfReactants>
          <speciesReference species="M_5aizc_c"/>
        </listOfReactants>
        <listOfProducts>
          <speciesReference species="M_5caiz_c"/>
        </listOfProducts>
        <kineticLaw>
          <math xmlns="http://www.w3.org/1998/Math/MathML">
            <ci> FLUX_VALUE </ci>
          </math>
          <listOfParameters>
            <parameter id="LOWER_BOUND" value="-1000" units="mmol_per_gDW_per_hr"/>
            <parameter id="UPPER_BOUND" value="1000" units="mmol_per_gDW_per_hr"/>
            <parameter id="OBJECTIVE_COEFFICIENT" value="0"/>
            <parameter id="FLUX_VALUE" value="0" units="mmol_per_gDW_per_hr"/>
          </listOfParameters>
        </kineticLaw>
      </reaction>
      <reaction id="R_AIRCr" name="phosphoribosylaminoimidazole carboxylase">
        <notes>
          <html xmlns="http://www.w3.org/1999/xhtml"><p>GENE_ASSOCIATION: ( ( Rv3257c  and  Rv3276c )  or  ( Rv3275c  and  Rv3276c ) )</p><p>GENE_LIST: Rv3257c Rv3275c Rv3276c</p><p>SUBSYSTEM: Purine Metabolism</p></html>
        </notes>
        <listOfReactants>
          <speciesReference species="M_air_c"/>
          <speciesReference species="M_co2_c"/>
        </listOfReactants>
        <listOfProducts>
          <speciesReference species="M_5aizc_c"/>
          <speciesReference species="M_h_c"/>
        </listOfProducts>
        <kineticLaw>
          <math xmlns="http://www.w3.org/1998/Math/MathML">
            <ci> FLUX_VALUE </ci>
          </math>
          <listOfParameters>
            <parameter id="LOWER_BOUND" value="-1000" units="mmol_per_gDW_per_hr"/>
            <parameter id="UPPER_BOUND" value="1000" units="mmol_per_gDW_per_hr"/>
            <parameter id="OBJECTIVE_COEFFICIENT" value="0"/>
            <parameter id="FLUX_VALUE" value="0" units="mmol_per_gDW_per_hr"/>
          </listOfParameters>
        </kineticLaw>
      </reaction>
      <reaction id="R_AKGDb" name="oxoglutarate dehydrogenase dihydrolipoamide S succinyltransferase " reversible="false">
        <notes>
          <html xmlns="http://www.w3.org/1999/xhtml"><p>GENE_ASSOCIATION: Rv2215</p><p>GENE_LIST: Rv2215</p><p>SUBSYSTEM: Citric Acid Cycle</p></html>
        </notes>
        <listOfReactants>
          <speciesReference species="M_coa_c"/>
          <speciesReference species="M_sdhlam_c"/>
        </listOfReactants>
        <listOfProducts>
          <speciesReference species="M_dhlam_c"/>
          <speciesReference species="M_succoa_c"/>
        </listOfProducts>
        <kineticLaw>
          <math xmlns="http://www.w3.org/1998/Math/MathML">
            <ci> FLUX_VALUE </ci>
          </math>
          <listOfParameters>
            <parameter id="LOWER_BOUND" value="0" units="mmol_per_gDW_per_hr"/>
            <parameter id="UPPER_BOUND" value="1000" units="mmol_per_gDW_per_hr"/>
            <parameter id="OBJECTIVE_COEFFICIENT" value="0"/>
            <parameter id="FLUX_VALUE" value="5" units="mmol_per_gDW_per_hr"/>
          </listOfParameters>
        </kineticLaw>
      </reaction>
      <reaction id="R_ALAALAD" name="D alanine D alanine dipeptidase" reversible="false">
        <notes>
          <html xmlns="http://www.w3.org/1999/xhtml"><p>GENE_ASSOCIATION: Rv3330</p><p>GENE_LIST: Rv3330</p><p>SUBSYSTEM: Membrane Metabolism</p></html>
        </notes>
        <listOfReactants>
          <speciesReference species="M_alaala_c"/>
          <speciesReference species="M_h2o_c"/>
        </listOfReactants>
        <listOfProducts>
          <speciesReference species="M_ala_D_c" stoichiometry="2"/>
        </listOfProducts>
        <kineticLaw>
          <math xmlns="http://www.w3.org/1998/Math/MathML">
            <ci> FLUX_VALUE </ci>
          </math>
          <listOfParameters>
            <parameter id="LOWER_BOUND" value="0" units="mmol_per_gDW_per_hr"/>
            <parameter id="UPPER_BOUND" value="1000" units="mmol_per_gDW_per_hr"/>
            <parameter id="OBJECTIVE_COEFFICIENT" value="0"/>
            <parameter id="FLUX_VALUE" value="5" units="mmol_per_gDW_per_hr"/>
          </listOfParameters>
        </kineticLaw>
      </reaction>
      <reaction id="R_ALAALAr" name="D alanine D alanine ligase reversible ">
        <notes>
          <html xmlns="http://www.w3.org/1999/xhtml"><p>GENE_ASSOCIATION: Rv2981c</p><p>GENE_LIST: Rv2981c</p><p>SUBSYSTEM: Alanine and Aspartate Metabolism</p></html>
        </notes>
        <listOfReactants>
          <speciesReference species="M_ala_D_c" stoichiometry="2"/>
          <speciesReference species="M_atp_c"/>
        </listOfReactants>
        <listOfProducts>
          <speciesReference species="M_adp_c"/>
          <speciesReference species="M_alaala_c"/>
          <speciesReference species="M_h_c"/>
          <speciesReference species="M_pi_c"/>
        </listOfProducts>
        <kineticLaw>
          <math xmlns="http://www.w3.org/1998/Math/MathML">
            <ci> FLUX_VALUE </ci>
          </math>
          <listOfParameters>
            <parameter id="LOWER_BOUND" value="-1000" units="mmol_per_gDW_per_hr"/>
            <parameter id="UPPER_BOUND" value="1000" units="mmol_per_gDW_per_hr"/>
            <parameter id="OBJECTIVE_COEFFICIENT" value="0"/>
            <parameter id="FLUX_VALUE" value="0" units="mmol_per_gDW_per_hr"/>
          </listOfParameters>
        </kineticLaw>
      </reaction>
      <reaction id="R_ALAD_L" name="L alanine dehydrogenase" reversible="false">
        <notes>
          <html xmlns="http://www.w3.org/1999/xhtml"><p>GENE_ASSOCIATION: Rv2780</p><p>GENE_LIST: Rv2780</p><p>SUBSYSTEM: Other Amino Acid Metabolism</p></html>
        </notes>
        <listOfReactants>
          <speciesReference species="M_ala_L_c"/>
          <speciesReference species="M_h2o_c"/>
          <speciesReference species="M_nad_c"/>
        </listOfReactants>
        <listOfProducts>
          <speciesReference species="M_h_c"/>
          <speciesReference species="M_nadh_c"/>
          <speciesReference species="M_nh4_c"/>
          <speciesReference species="M_pyr_c"/>
        </listOfProducts>
        <kineticLaw>
          <math xmlns="http://www.w3.org/1998/Math/MathML">
            <ci> FLUX_VALUE </ci>
          </math>
          <listOfParameters>
            <parameter id="LOWER_BOUND" value="0" units="mmol_per_gDW_per_hr"/>
            <parameter id="UPPER_BOUND" value="1000" units="mmol_per_gDW_per_hr"/>
            <parameter id="OBJECTIVE_COEFFICIENT" value="0"/>
            <parameter id="FLUX_VALUE" value="5" units="mmol_per_gDW_per_hr"/>
          </listOfParameters>
        </kineticLaw>
      </reaction>
      <reaction id="R_ALAR" name="alanine racemase">
        <notes>
          <html xmlns="http://www.w3.org/1999/xhtml"><p>GENE_ASSOCIATION: Rv3423c</p><p>GENE_LIST: Rv3423c</p><p>SUBSYSTEM: Alanine and Aspartate Metabolism</p></html>
        </notes>
        <listOfReactants>
          <speciesReference species="M_ala_L_c"/>
        </listOfReactants>
        <listOfProducts>
          <speciesReference species="M_ala_D_c"/>
        </listOfProducts>
        <kineticLaw>
          <math xmlns="http://www.w3.org/1998/Math/MathML">
            <ci> FLUX_VALUE </ci>
          </math>
          <listOfParameters>
            <parameter id="LOWER_BOUND" value="-1000" units="mmol_per_gDW_per_hr"/>
            <parameter id="UPPER_BOUND" value="1000" units="mmol_per_gDW_per_hr"/>
            <parameter id="OBJECTIVE_COEFFICIENT" value="0"/>
            <parameter id="FLUX_VALUE" value="0" units="mmol_per_gDW_per_hr"/>
          </listOfParameters>
        </kineticLaw>
      </reaction>
      <reaction id="R_ALATA_L" name="L alanine transaminase">
        <notes>
          <html xmlns="http://www.w3.org/1999/xhtml"><p>SUBSYSTEM: Alanine and Aspartate Metabolism</p></html>
        </notes>
        <listOfReactants>
          <speciesReference species="M_akg_c"/>
          <speciesReference species="M_ala_L_c"/>
        </listOfReactants>
        <listOfProducts>
          <speciesReference species="M_glu_L_c"/>
          <speciesReference species="M_pyr_c"/>
        </listOfProducts>
        <kineticLaw>
          <math xmlns="http://www.w3.org/1998/Math/MathML">
            <ci> FLUX_VALUE </ci>
          </math>
          <listOfParameters>
            <parameter id="LOWER_BOUND" value="-1000" units="mmol_per_gDW_per_hr"/>
            <parameter id="UPPER_BOUND" value="1000" units="mmol_per_gDW_per_hr"/>
            <parameter id="OBJECTIVE_COEFFICIENT" value="0"/>
            <parameter id="FLUX_VALUE" value="0" units="mmol_per_gDW_per_hr"/>
          </listOfParameters>
        </kineticLaw>
      </reaction>
      <reaction id="R_ALATRS" name="Alanyl tRNA synthetase" reversible="false">
        <notes>
          <html xmlns="http://www.w3.org/1999/xhtml"><p>GENE_ASSOCIATION: Rv2992c</p><p>GENE_LIST: Rv2992c</p><p>SUBSYSTEM: Cofactor Metabolism</p></html>
        </notes>
        <listOfReactants>
          <speciesReference species="M_ala_L_c"/>
          <speciesReference species="M_atp_c"/>
          <speciesReference species="M_trnaala_c"/>
        </listOfReactants>
        <listOfProducts>
          <speciesReference species="M_alatrna_c"/>
          <speciesReference species="M_amp_c"/>
          <speciesReference species="M_ppi_c"/>
        </listOfProducts>
        <kineticLaw>
          <math xmlns="http://www.w3.org/1998/Math/MathML">
            <ci> FLUX_VALUE </ci>
          </math>
          <listOfParameters>
            <parameter id="LOWER_BOUND" value="0" units="mmol_per_gDW_per_hr"/>
            <parameter id="UPPER_BOUND" value="1000" units="mmol_per_gDW_per_hr"/>
            <parameter id="OBJECTIVE_COEFFICIENT" value="0"/>
            <parameter id="FLUX_VALUE" value="5" units="mmol_per_gDW_per_hr"/>
          </listOfParameters>
        </kineticLaw>
      </reaction>
      <reaction id="R_ALAt2r" name="L alanine reversible transport via proton symport">
        <notes>
          <html xmlns="http://www.w3.org/1999/xhtml"><p>SUBSYSTEM: Transport</p></html>
        </notes>
        <listOfReactants>
          <speciesReference species="M_ala_L_e"/>
          <speciesReference species="M_h_e"/>
        </listOfReactants>
        <listOfProducts>
          <speciesReference species="M_ala_L_c"/>
          <speciesReference species="M_h_c"/>
        </listOfProducts>
        <kineticLaw>
          <math xmlns="http://www.w3.org/1998/Math/MathML">
            <ci> FLUX_VALUE </ci>
          </math>
          <listOfParameters>
            <parameter id="LOWER_BOUND" value="-1000" units="mmol_per_gDW_per_hr"/>
            <parameter id="UPPER_BOUND" value="1000" units="mmol_per_gDW_per_hr"/>
            <parameter id="OBJECTIVE_COEFFICIENT" value="0"/>
            <parameter id="FLUX_VALUE" value="0" units="mmol_per_gDW_per_hr"/>
          </listOfParameters>
        </kineticLaw>
      </reaction>
      <reaction id="R_ALDD1" name="aldehyde dehydrogenase formaldehyde NAD " reversible="false">
        <notes>
          <html xmlns="http://www.w3.org/1999/xhtml"><p>GENE_ASSOCIATION: ( Rv2259  or  Rv1895  or  Rv3045 )</p><p>GENE_LIST: Rv1895 Rv2259 Rv3045</p><p>SUBSYSTEM: Redox Metabolism</p></html>
        </notes>
        <listOfReactants>
          <speciesReference species="M_fald_c"/>
          <speciesReference species="M_h2o_c"/>
          <speciesReference species="M_nad_c"/>
        </listOfReactants>
        <listOfProducts>
          <speciesReference species="M_for_c"/>
          <speciesReference species="M_h_c" stoichiometry="2"/>
          <speciesReference species="M_nadh_c"/>
        </listOfProducts>
        <kineticLaw>
          <math xmlns="http://www.w3.org/1998/Math/MathML">
            <ci> FLUX_VALUE </ci>
          </math>
          <listOfParameters>
            <parameter id="LOWER_BOUND" value="0" units="mmol_per_gDW_per_hr"/>
            <parameter id="UPPER_BOUND" value="1000" units="mmol_per_gDW_per_hr"/>
            <parameter id="OBJECTIVE_COEFFICIENT" value="0"/>
            <parameter id="FLUX_VALUE" value="5" units="mmol_per_gDW_per_hr"/>
          </listOfParameters>
        </kineticLaw>
      </reaction>
      <reaction id="R_ALDD19x" name="aldehyde dehydrogenase phenylacetaldehyde NAD " reversible="false">
        <notes>
          <html xmlns="http://www.w3.org/1999/xhtml"><p>GENE_ASSOCIATION: Rv2858c</p><p>GENE_LIST: Rv2858c</p><p>SUBSYSTEM: Phenylalanine Tyrosine Tryptophan Metabolism</p></html>
        </notes>
        <listOfReactants>
          <speciesReference species="M_h2o_c"/>
          <speciesReference species="M_nad_c"/>
          <speciesReference species="M_pacald_c"/>
        </listOfReactants>
        <listOfProducts>
          <speciesReference species="M_h_c" stoichiometry="2"/>
          <speciesReference species="M_nadh_c"/>
          <speciesReference species="M_pac_c"/>
        </listOfProducts>
        <kineticLaw>
          <math xmlns="http://www.w3.org/1998/Math/MathML">
            <ci> FLUX_VALUE </ci>
          </math>
          <listOfParameters>
            <parameter id="LOWER_BOUND" value="0" units="mmol_per_gDW_per_hr"/>
            <parameter id="UPPER_BOUND" value="1000" units="mmol_per_gDW_per_hr"/>
            <parameter id="OBJECTIVE_COEFFICIENT" value="0"/>
            <parameter id="FLUX_VALUE" value="5" units="mmol_per_gDW_per_hr"/>
          </listOfParameters>
        </kineticLaw>
      </reaction>
      <reaction id="R_ALDD2x" name="aldehyde dehydrogenase acetaldehyde NAD " reversible="false">
        <notes>
          <html xmlns="http://www.w3.org/1999/xhtml"><p>GENE_ASSOCIATION: ( ( Rv0768  and  Rv3293 )  or  Rv0147 )</p><p>GENE_LIST: Rv0147 Rv0768 Rv3293</p><p>SUBSYSTEM: Glycolysis</p></html>
        </notes>
        <listOfReactants>
          <speciesReference species="M_acald_c"/>
          <speciesReference species="M_h2o_c"/>
          <speciesReference species="M_nad_c"/>
        </listOfReactants>
        <listOfProducts>
          <speciesReference species="M_ac_c"/>
          <speciesReference species="M_h_c" stoichiometry="2"/>
          <speciesReference species="M_nadh_c"/>
        </listOfProducts>
        <kineticLaw>
          <math xmlns="http://www.w3.org/1998/Math/MathML">
            <ci> FLUX_VALUE </ci>
          </math>
          <listOfParameters>
            <parameter id="LOWER_BOUND" value="0" units="mmol_per_gDW_per_hr"/>
            <parameter id="UPPER_BOUND" value="1000" units="mmol_per_gDW_per_hr"/>
            <parameter id="OBJECTIVE_COEFFICIENT" value="0"/>
            <parameter id="FLUX_VALUE" value="5" units="mmol_per_gDW_per_hr"/>
          </listOfParameters>
        </kineticLaw>
      </reaction>
      <reaction id="R_AMAOTr" name="adenosylmethionine 8 amino 7 oxononanoate transaminase">
        <notes>
          <html xmlns="http://www.w3.org/1999/xhtml"><p>GENE_ASSOCIATION: Rv1568</p><p>GENE_LIST: Rv1568</p><p>SUBSYSTEM: Biotin Metabolism</p></html>
        </notes>
        <listOfReactants>
          <speciesReference species="M_8aonn_c"/>
          <speciesReference species="M_amet_c"/>
        </listOfReactants>
        <listOfProducts>
          <speciesReference species="M_amob_c"/>
          <speciesReference species="M_dann_c"/>
        </listOfProducts>
        <kineticLaw>
          <math xmlns="http://www.w3.org/1998/Math/MathML">
            <ci> FLUX_VALUE </ci>
          </math>
          <listOfParameters>
            <parameter id="LOWER_BOUND" value="-1000" units="mmol_per_gDW_per_hr"/>
            <parameter id="UPPER_BOUND" value="1000" units="mmol_per_gDW_per_hr"/>
            <parameter id="OBJECTIVE_COEFFICIENT" value="0"/>
            <parameter id="FLUX_VALUE" value="0" units="mmol_per_gDW_per_hr"/>
          </listOfParameters>
        </kineticLaw>
      </reaction>
      <reaction id="R_AMID4" name="amidase" reversible="false">
        <notes>
          <html xmlns="http://www.w3.org/1999/xhtml"><p>GENE_ASSOCIATION: Rv2363</p><p>GENE_LIST: Rv2363</p><p>SUBSYSTEM: Other Amino Acid Metabolism</p></html>
        </notes>
        <listOfReactants>
          <speciesReference species="M_ad_c"/>
          <speciesReference species="M_h2o_c"/>
        </listOfReactants>
        <listOfProducts>
          <speciesReference species="M_ac_c"/>
          <speciesReference species="M_nh4_c"/>
        </listOfProducts>
        <kineticLaw>
          <math xmlns="http://www.w3.org/1998/Math/MathML">
            <ci> FLUX_VALUE </ci>
          </math>
          <listOfParameters>
            <parameter id="LOWER_BOUND" value="0" units="mmol_per_gDW_per_hr"/>
            <parameter id="UPPER_BOUND" value="1000" units="mmol_per_gDW_per_hr"/>
            <parameter id="OBJECTIVE_COEFFICIENT" value="0"/>
            <parameter id="FLUX_VALUE" value="5" units="mmol_per_gDW_per_hr"/>
          </listOfParameters>
        </kineticLaw>
      </reaction>
      <reaction id="R_AMMQT6" name="S adenosylmethione" reversible="false">
        <notes>
          <html xmlns="http://www.w3.org/1999/xhtml"><p>SUBSYSTEM: Ubiquinone Metabolism</p></html>
        </notes>
        <listOfReactants>
          <speciesReference species="M_2dmmq6_c"/>
          <speciesReference species="M_amet_c"/>
        </listOfReactants>
        <listOfProducts>
          <speciesReference species="M_ahcys_c"/>
          <speciesReference species="M_h_c"/>
          <speciesReference species="M_mqn6_c"/>
        </listOfProducts>
        <kineticLaw>
          <math xmlns="http://www.w3.org/1998/Math/MathML">
            <ci> FLUX_VALUE </ci>
          </math>
          <listOfParameters>
            <parameter id="LOWER_BOUND" value="0" units="mmol_per_gDW_per_hr"/>
            <parameter id="UPPER_BOUND" value="1000" units="mmol_per_gDW_per_hr"/>
            <parameter id="OBJECTIVE_COEFFICIENT" value="0"/>
            <parameter id="FLUX_VALUE" value="5" units="mmol_per_gDW_per_hr"/>
          </listOfParameters>
        </kineticLaw>
      </reaction>
      <reaction id="R_AMMQT8" name="S adenosylmethione2 demthylmenaquinone methyltransferase menaquinone 8 " reversible="false">
        <notes>
          <html xmlns="http://www.w3.org/1999/xhtml"><p>GENE_ASSOCIATION: Rv0558</p><p>GENE_LIST: Rv0558</p><p>SUBSYSTEM: Ubiquinone Metabolism</p></html>
        </notes>
        <listOfReactants>
          <speciesReference species="M_2dmmq8_c"/>
          <speciesReference species="M_amet_c"/>
          <speciesReference species="M_h_c"/>
        </listOfReactants>
        <listOfProducts>
          <speciesReference species="M_ahcys_c"/>
          <speciesReference species="M_mql8_c"/>
        </listOfProducts>
        <kineticLaw>
          <math xmlns="http://www.w3.org/1998/Math/MathML">
            <ci> FLUX_VALUE </ci>
          </math>
          <listOfParameters>
            <parameter id="LOWER_BOUND" value="0" units="mmol_per_gDW_per_hr"/>
            <parameter id="UPPER_BOUND" value="1000" units="mmol_per_gDW_per_hr"/>
            <parameter id="OBJECTIVE_COEFFICIENT" value="0"/>
            <parameter id="FLUX_VALUE" value="5" units="mmol_per_gDW_per_hr"/>
          </listOfParameters>
        </kineticLaw>
      </reaction>
      <reaction id="R_AMMQT8_2" name="S adenosylmethione2 demethylmenaquinone methyltransferase" reversible="false">
        <notes>
          <html xmlns="http://www.w3.org/1999/xhtml"><p>SUBSYSTEM: Ubiquinone Metabolism</p></html>
        </notes>
        <listOfReactants>
          <speciesReference species="M_2dmmq8_c"/>
          <speciesReference species="M_amet_c"/>
        </listOfReactants>
        <listOfProducts>
          <speciesReference species="M_ahcys_c"/>
          <speciesReference species="M_h_c"/>
          <speciesReference species="M_mqn8_c"/>
        </listOfProducts>
        <kineticLaw>
          <math xmlns="http://www.w3.org/1998/Math/MathML">
            <ci> FLUX_VALUE </ci>
          </math>
          <listOfParameters>
            <parameter id="LOWER_BOUND" value="0" units="mmol_per_gDW_per_hr"/>
            <parameter id="UPPER_BOUND" value="1000" units="mmol_per_gDW_per_hr"/>
            <parameter id="OBJECTIVE_COEFFICIENT" value="0"/>
            <parameter id="FLUX_VALUE" value="5" units="mmol_per_gDW_per_hr"/>
          </listOfParameters>
        </kineticLaw>
      </reaction>
      <reaction id="R_AMPTASECG" name="alanyl aminopeptidase cys gly " reversible="false">
        <notes>
          <html xmlns="http://www.w3.org/1999/xhtml"><p>GENE_ASSOCIATION: Rv2467</p><p>GENE_LIST: Rv2467</p><p>SUBSYSTEM: Other Amino Acid Metabolism</p></html>
        </notes>
        <listOfReactants>
          <speciesReference species="M_cgly_c"/>
          <speciesReference species="M_h2o_c"/>
        </listOfReactants>
        <listOfProducts>
          <speciesReference species="M_cys_L_c"/>
          <speciesReference species="M_gly_c"/>
        </listOfProducts>
        <kineticLaw>
          <math xmlns="http://www.w3.org/1998/Math/MathML">
            <ci> FLUX_VALUE </ci>
          </math>
          <listOfParameters>
            <parameter id="LOWER_BOUND" value="0" units="mmol_per_gDW_per_hr"/>
            <parameter id="UPPER_BOUND" value="1000" units="mmol_per_gDW_per_hr"/>
            <parameter id="OBJECTIVE_COEFFICIENT" value="0"/>
            <parameter id="FLUX_VALUE" value="5" units="mmol_per_gDW_per_hr"/>
          </listOfParameters>
        </kineticLaw>
      </reaction>
      <reaction id="R_ANPRT" name="anthranilate phosphoribosyltransferase" reversible="false">
        <notes>
          <html xmlns="http://www.w3.org/1999/xhtml"><p>GENE_ASSOCIATION: Rv2192c</p><p>GENE_LIST: Rv2192c</p><p>SUBSYSTEM: Phenylalanine Tyrosine Tryptophan Metabolism</p></html>
        </notes>
        <listOfReactants>
          <speciesReference species="M_anth_c"/>
          <speciesReference species="M_prpp_c"/>
        </listOfReactants>
        <listOfProducts>
          <speciesReference species="M_ppi_c"/>
          <speciesReference species="M_pran_c"/>
        </listOfProducts>
        <kineticLaw>
          <math xmlns="http://www.w3.org/1998/Math/MathML">
            <ci> FLUX_VALUE </ci>
          </math>
          <listOfParameters>
            <parameter id="LOWER_BOUND" value="0" units="mmol_per_gDW_per_hr"/>
            <parameter id="UPPER_BOUND" value="1000" units="mmol_per_gDW_per_hr"/>
            <parameter id="OBJECTIVE_COEFFICIENT" value="0"/>
            <parameter id="FLUX_VALUE" value="5" units="mmol_per_gDW_per_hr"/>
          </listOfParameters>
        </kineticLaw>
      </reaction>
      <reaction id="R_ANS" name="anthranilate synthase" reversible="false">
        <notes>
          <html xmlns="http://www.w3.org/1999/xhtml"><p>GENE_ASSOCIATION: ( Rv1609  or  Rv2859c )</p><p>GENE_LIST: Rv1609 Rv2859c</p><p>SUBSYSTEM: Phenylalanine Tyrosine Tryptophan Metabolism</p></html>
        </notes>
        <listOfReactants>
          <speciesReference species="M_chor_c"/>
          <speciesReference species="M_gln_L_c"/>
        </listOfReactants>
        <listOfProducts>
          <speciesReference species="M_anth_c"/>
          <speciesReference species="M_glu_L_c"/>
          <speciesReference species="M_h_c"/>
          <speciesReference species="M_pyr_c"/>
        </listOfProducts>
        <kineticLaw>
          <math xmlns="http://www.w3.org/1998/Math/MathML">
            <ci> FLUX_VALUE </ci>
          </math>
          <listOfParameters>
            <parameter id="LOWER_BOUND" value="0" units="mmol_per_gDW_per_hr"/>
            <parameter id="UPPER_BOUND" value="1000" units="mmol_per_gDW_per_hr"/>
            <parameter id="OBJECTIVE_COEFFICIENT" value="0"/>
            <parameter id="FLUX_VALUE" value="5" units="mmol_per_gDW_per_hr"/>
          </listOfParameters>
        </kineticLaw>
      </reaction>
      <reaction id="R_AOXSr" name="8 amino 7 oxononanoate synthase">
        <notes>
          <html xmlns="http://www.w3.org/1999/xhtml"><p>GENE_ASSOCIATION: ( Rv1569  or  Rv0032 )</p><p>GENE_LIST: Rv0032 Rv1569</p><p>SUBSYSTEM: Biotin Metabolism</p></html>
        </notes>
        <listOfReactants>
          <speciesReference species="M_ala_L_c"/>
          <speciesReference species="M_h_c"/>
          <speciesReference species="M_pmcoa_c"/>
        </listOfReactants>
        <listOfProducts>
          <speciesReference species="M_8aonn_c"/>
          <speciesReference species="M_co2_c"/>
          <speciesReference species="M_coa_c"/>
        </listOfProducts>
        <kineticLaw>
          <math xmlns="http://www.w3.org/1998/Math/MathML">
            <ci> FLUX_VALUE </ci>
          </math>
          <listOfParameters>
            <parameter id="LOWER_BOUND" value="-1000" units="mmol_per_gDW_per_hr"/>
            <parameter id="UPPER_BOUND" value="1000" units="mmol_per_gDW_per_hr"/>
            <parameter id="OBJECTIVE_COEFFICIENT" value="0"/>
            <parameter id="FLUX_VALUE" value="0" units="mmol_per_gDW_per_hr"/>
          </listOfParameters>
        </kineticLaw>
      </reaction>
      <reaction id="R_APATr" name="B alanine pyruvate aminotransferase">
        <notes>
          <html xmlns="http://www.w3.org/1999/xhtml"><p>SUBSYSTEM: Alanine and Aspartate Metabolism</p></html>
        </notes>
        <listOfReactants>
          <speciesReference species="M_ala_B_c"/>
          <speciesReference species="M_pyr_c"/>
        </listOfReactants>
        <listOfProducts>
          <speciesReference species="M_ala_L_c"/>
          <speciesReference species="M_msa_c"/>
        </listOfProducts>
        <kineticLaw>
          <math xmlns="http://www.w3.org/1998/Math/MathML">
            <ci> FLUX_VALUE </ci>
          </math>
          <listOfParameters>
            <parameter id="LOWER_BOUND" value="-1000" units="mmol_per_gDW_per_hr"/>
            <parameter id="UPPER_BOUND" value="1000" units="mmol_per_gDW_per_hr"/>
            <parameter id="OBJECTIVE_COEFFICIENT" value="0"/>
            <parameter id="FLUX_VALUE" value="0" units="mmol_per_gDW_per_hr"/>
          </listOfParameters>
        </kineticLaw>
      </reaction>
      <reaction id="R_APRAUR" name="5 amino 6 5 phosphoribosylamino uracil reductase" reversible="false">
        <notes>
          <html xmlns="http://www.w3.org/1999/xhtml"><p>GENE_ASSOCIATION: Rv2671</p><p>GENE_LIST: Rv2671</p><p>SUBSYSTEM: Riboflavin Metabolism</p></html>
        </notes>
        <listOfReactants>
          <speciesReference species="M_5apru_c"/>
          <speciesReference species="M_h_c"/>
          <speciesReference species="M_nadph_c"/>
        </listOfReactants>
        <listOfProducts>
          <speciesReference species="M_5aprbu_c"/>
          <speciesReference species="M_nadp_c"/>
        </listOfProducts>
        <kineticLaw>
          <math xmlns="http://www.w3.org/1998/Math/MathML">
            <ci> FLUX_VALUE </ci>
          </math>
          <listOfParameters>
            <parameter id="LOWER_BOUND" value="0" units="mmol_per_gDW_per_hr"/>
            <parameter id="UPPER_BOUND" value="1000" units="mmol_per_gDW_per_hr"/>
            <parameter id="OBJECTIVE_COEFFICIENT" value="0"/>
            <parameter id="FLUX_VALUE" value="5" units="mmol_per_gDW_per_hr"/>
          </listOfParameters>
        </kineticLaw>
      </reaction>
      <reaction id="R_ARABF" name="arabinan complex formation M tb " reversible="false">
        <notes>
          <html xmlns="http://www.w3.org/1999/xhtml"><p>SUBSYSTEM: Membrane Metabolism</p></html>
        </notes>
        <listOfReactants>
          <speciesReference species="M_arab_D_c" stoichiometry="12"/>
          <speciesReference species="M_mharab_D_c" stoichiometry="8"/>
          <speciesReference species="M_tarab_D_c" stoichiometry="12"/>
        </listOfReactants>
        <listOfProducts>
          <speciesReference species="M_arabinan_c"/>
          <speciesReference species="M_h2o_c" stoichiometry="32"/>
        </listOfProducts>
        <kineticLaw>
          <math xmlns="http://www.w3.org/1998/Math/MathML">
            <ci> FLUX_VALUE </ci>
          </math>
          <listOfParameters>
            <parameter id="LOWER_BOUND" value="0" units="mmol_per_gDW_per_hr"/>
            <parameter id="UPPER_BOUND" value="1000" units="mmol_per_gDW_per_hr"/>
            <parameter id="OBJECTIVE_COEFFICIENT" value="0"/>
            <parameter id="FLUX_VALUE" value="5" units="mmol_per_gDW_per_hr"/>
          </listOfParameters>
        </kineticLaw>
      </reaction>
      <reaction id="R_ARABI" name="arabinose isomerase">
        <notes>
          <html xmlns="http://www.w3.org/1999/xhtml"><p>SUBSYSTEM: Sugar Metabolism</p></html>
        </notes>
        <listOfReactants>
          <speciesReference species="M_arab_D_c"/>
        </listOfReactants>
        <listOfProducts>
          <speciesReference species="M_rbl_D_c"/>
        </listOfProducts>
        <kineticLaw>
          <math xmlns="http://www.w3.org/1998/Math/MathML">
            <ci> FLUX_VALUE </ci>
          </math>
          <listOfParameters>
            <parameter id="LOWER_BOUND" value="-1000" units="mmol_per_gDW_per_hr"/>
            <parameter id="UPPER_BOUND" value="1000" units="mmol_per_gDW_per_hr"/>
            <parameter id="OBJECTIVE_COEFFICIENT" value="0"/>
            <parameter id="FLUX_VALUE" value="0" units="mmol_per_gDW_per_hr"/>
          </listOfParameters>
        </kineticLaw>
      </reaction>
      <reaction id="R_ARACHTA" name="transacylase">
        <notes>
          <html xmlns="http://www.w3.org/1999/xhtml"><p>SUBSYSTEM: Membrane Metabolism</p></html>
        </notes>
        <listOfReactants>
          <speciesReference species="M_ACP_c"/>
          <speciesReference species="M_arachcoa_c"/>
        </listOfReactants>
        <listOfProducts>
          <speciesReference species="M_arachACP_c"/>
          <speciesReference species="M_coa_c"/>
        </listOfProducts>
        <kineticLaw>
          <math xmlns="http://www.w3.org/1998/Math/MathML">
            <ci> FLUX_VALUE </ci>
          </math>
          <listOfParameters>
            <parameter id="LOWER_BOUND" value="-1000" units="mmol_per_gDW_per_hr"/>
            <parameter id="UPPER_BOUND" value="1000" units="mmol_per_gDW_per_hr"/>
            <parameter id="OBJECTIVE_COEFFICIENT" value="0"/>
            <parameter id="FLUX_VALUE" value="0" units="mmol_per_gDW_per_hr"/>
          </listOfParameters>
        </kineticLaw>
      </reaction>
      <reaction id="R_ARAI" name="L arabinose isomerase">
        <notes>
          <html xmlns="http://www.w3.org/1999/xhtml"><p>SUBSYSTEM: Sugar Metabolism</p></html>
        </notes>
        <listOfReactants>
          <speciesReference species="M_arab_L_c"/>
        </listOfReactants>
        <listOfProducts>
          <speciesReference species="M_rbl_L_c"/>
        </listOfProducts>
        <kineticLaw>
          <math xmlns="http://www.w3.org/1998/Math/MathML">
            <ci> FLUX_VALUE </ci>
          </math>
          <listOfParameters>
            <parameter id="LOWER_BOUND" value="-1000" units="mmol_per_gDW_per_hr"/>
            <parameter id="UPPER_BOUND" value="1000" units="mmol_per_gDW_per_hr"/>
            <parameter id="OBJECTIVE_COEFFICIENT" value="0"/>
            <parameter id="FLUX_VALUE" value="0" units="mmol_per_gDW_per_hr"/>
          </listOfParameters>
        </kineticLaw>
      </reaction>
      <reaction id="R_ARB_Dabc" name="L arabinose transport via ABC system" reversible="false">
        <notes>
          <html xmlns="http://www.w3.org/1999/xhtml"><p>SUBSYSTEM: Transport</p></html>
        </notes>
        <listOfReactants>
          <speciesReference species="M_arab_D_e"/>
          <speciesReference species="M_atp_c"/>
          <speciesReference species="M_h2o_c"/>
        </listOfReactants>
        <listOfProducts>
          <speciesReference species="M_adp_c"/>
          <speciesReference species="M_arab_D_c"/>
          <speciesReference species="M_h_c"/>
          <speciesReference species="M_pi_c"/>
        </listOfProducts>
        <kineticLaw>
          <math xmlns="http://www.w3.org/1998/Math/MathML">
            <ci> FLUX_VALUE </ci>
          </math>
          <listOfParameters>
            <parameter id="LOWER_BOUND" value="0" units="mmol_per_gDW_per_hr"/>
            <parameter id="UPPER_BOUND" value="1000" units="mmol_per_gDW_per_hr"/>
            <parameter id="OBJECTIVE_COEFFICIENT" value="0"/>
            <parameter id="FLUX_VALUE" value="5" units="mmol_per_gDW_per_hr"/>
          </listOfParameters>
        </kineticLaw>
      </reaction>
      <reaction id="R_ARBabc" name="L arabinose transport via ABC system" reversible="false">
        <notes>
          <html xmlns="http://www.w3.org/1999/xhtml"><p>SUBSYSTEM: Transport</p></html>
        </notes>
        <listOfReactants>
          <speciesReference species="M_arab_L_e"/>
          <speciesReference species="M_atp_c"/>
          <speciesReference species="M_h2o_c"/>
        </listOfReactants>
        <listOfProducts>
          <speciesReference species="M_adp_c"/>
          <speciesReference species="M_arab_L_c"/>
          <speciesReference species="M_h_c"/>
          <speciesReference species="M_pi_c"/>
        </listOfProducts>
        <kineticLaw>
          <math xmlns="http://www.w3.org/1998/Math/MathML">
            <ci> FLUX_VALUE </ci>
          </math>
          <listOfParameters>
            <parameter id="LOWER_BOUND" value="0" units="mmol_per_gDW_per_hr"/>
            <parameter id="UPPER_BOUND" value="1000" units="mmol_per_gDW_per_hr"/>
            <parameter id="OBJECTIVE_COEFFICIENT" value="0"/>
            <parameter id="FLUX_VALUE" value="5" units="mmol_per_gDW_per_hr"/>
          </listOfParameters>
        </kineticLaw>
      </reaction>
      <reaction id="R_ARBt2r" name="L arabinose transport via proton symport">
        <notes>
          <html xmlns="http://www.w3.org/1999/xhtml"><p>SUBSYSTEM: Transport</p></html>
        </notes>
        <listOfReactants>
          <speciesReference species="M_arab_L_e"/>
          <speciesReference species="M_h_e"/>
        </listOfReactants>
        <listOfProducts>
          <speciesReference species="M_arab_L_c"/>
          <speciesReference species="M_h_c"/>
        </listOfProducts>
        <kineticLaw>
          <math xmlns="http://www.w3.org/1998/Math/MathML">
            <ci> FLUX_VALUE </ci>
          </math>
          <listOfParameters>
            <parameter id="LOWER_BOUND" value="-1000" units="mmol_per_gDW_per_hr"/>
            <parameter id="UPPER_BOUND" value="1000" units="mmol_per_gDW_per_hr"/>
            <parameter id="OBJECTIVE_COEFFICIENT" value="0"/>
            <parameter id="FLUX_VALUE" value="0" units="mmol_per_gDW_per_hr"/>
          </listOfParameters>
        </kineticLaw>
      </reaction>
      <reaction id="R_ARGDC" name="arginine decarboxylase" reversible="false">
        <notes>
          <html xmlns="http://www.w3.org/1999/xhtml"><p>GENE_ASSOCIATION: Rv2531c</p><p>GENE_LIST: Rv2531c</p><p>SUBSYSTEM: Glutamate Metabolism</p></html>
        </notes>
        <listOfReactants>
          <speciesReference species="M_arg_L_c"/>
          <speciesReference species="M_h_c"/>
        </listOfReactants>
        <listOfProducts>
          <speciesReference species="M_agm_c"/>
          <speciesReference species="M_co2_c"/>
        </listOfProducts>
        <kineticLaw>
          <math xmlns="http://www.w3.org/1998/Math/MathML">
            <ci> FLUX_VALUE </ci>
          </math>
          <listOfParameters>
            <parameter id="LOWER_BOUND" value="0" units="mmol_per_gDW_per_hr"/>
            <parameter id="UPPER_BOUND" value="1000" units="mmol_per_gDW_per_hr"/>
            <parameter id="OBJECTIVE_COEFFICIENT" value="0"/>
            <parameter id="FLUX_VALUE" value="5" units="mmol_per_gDW_per_hr"/>
          </listOfParameters>
        </kineticLaw>
      </reaction>
      <reaction id="R_ARGDr" name="arginine deiminase">
        <notes>
          <html xmlns="http://www.w3.org/1999/xhtml"><p>GENE_ASSOCIATION: Rv1001</p><p>GENE_LIST: Rv1001</p><p>SUBSYSTEM: Arginine and Proline Metabolism</p></html>
        </notes>
        <listOfReactants>
          <speciesReference species="M_arg_L_c"/>
          <speciesReference species="M_h2o_c"/>
        </listOfReactants>
        <listOfProducts>
          <speciesReference species="M_citr_L_c"/>
          <speciesReference species="M_nh4_c"/>
        </listOfProducts>
        <kineticLaw>
          <math xmlns="http://www.w3.org/1998/Math/MathML">
            <ci> FLUX_VALUE </ci>
          </math>
          <listOfParameters>
            <parameter id="LOWER_BOUND" value="-1000" units="mmol_per_gDW_per_hr"/>
            <parameter id="UPPER_BOUND" value="1000" units="mmol_per_gDW_per_hr"/>
            <parameter id="OBJECTIVE_COEFFICIENT" value="0"/>
            <parameter id="FLUX_VALUE" value="0" units="mmol_per_gDW_per_hr"/>
          </listOfParameters>
        </kineticLaw>
      </reaction>
      <reaction id="R_ARGSL" name="argininosuccinate lyase">
        <notes>
          <html xmlns="http://www.w3.org/1999/xhtml"><p>GENE_ASSOCIATION: Rv1659</p><p>GENE_LIST: Rv1659</p><p>SUBSYSTEM: Alanine and Aspartate Metabolism</p></html>
        </notes>
        <listOfReactants>
          <speciesReference species="M_argsuc_c"/>
        </listOfReactants>
        <listOfProducts>
          <speciesReference species="M_arg_L_c"/>
          <speciesReference species="M_fum_c"/>
        </listOfProducts>
        <kineticLaw>
          <math xmlns="http://www.w3.org/1998/Math/MathML">
            <ci> FLUX_VALUE </ci>
          </math>
          <listOfParameters>
            <parameter id="LOWER_BOUND" value="-1000" units="mmol_per_gDW_per_hr"/>
            <parameter id="UPPER_BOUND" value="1000" units="mmol_per_gDW_per_hr"/>
            <parameter id="OBJECTIVE_COEFFICIENT" value="0"/>
            <parameter id="FLUX_VALUE" value="0" units="mmol_per_gDW_per_hr"/>
          </listOfParameters>
        </kineticLaw>
      </reaction>
      <reaction id="R_ARGSS" name="argininosuccinate synthase" reversible="false">
        <notes>
          <html xmlns="http://www.w3.org/1999/xhtml"><p>GENE_ASSOCIATION: Rv1658</p><p>GENE_LIST: Rv1658</p><p>SUBSYSTEM: Alanine and Aspartate Metabolism</p></html>
        </notes>
        <listOfReactants>
          <speciesReference species="M_asp_L_c"/>
          <speciesReference species="M_atp_c"/>
          <speciesReference species="M_citr_L_c"/>
        </listOfReactants>
        <listOfProducts>
          <speciesReference species="M_amp_c"/>
          <speciesReference species="M_argsuc_c"/>
          <speciesReference species="M_h_c"/>
          <speciesReference species="M_ppi_c"/>
        </listOfProducts>
        <kineticLaw>
          <math xmlns="http://www.w3.org/1998/Math/MathML">
            <ci> FLUX_VALUE </ci>
          </math>
          <listOfParameters>
            <parameter id="LOWER_BOUND" value="0" units="mmol_per_gDW_per_hr"/>
            <parameter id="UPPER_BOUND" value="1000" units="mmol_per_gDW_per_hr"/>
            <parameter id="OBJECTIVE_COEFFICIENT" value="0"/>
            <parameter id="FLUX_VALUE" value="5" units="mmol_per_gDW_per_hr"/>
          </listOfParameters>
        </kineticLaw>
      </reaction>
      <reaction id="R_ARGt5r" name="L arginine transport via diffusion">
        <notes>
          <html xmlns="http://www.w3.org/1999/xhtml"><p>GENE_ASSOCIATION: Rv2320c</p><p>GENE_LIST: Rv2320c</p><p>SUBSYSTEM: Transport</p></html>
        </notes>
        <listOfReactants>
          <speciesReference species="M_arg_L_e"/>
        </listOfReactants>
        <listOfProducts>
          <speciesReference species="M_arg_L_c"/>
        </listOfProducts>
        <kineticLaw>
          <math xmlns="http://www.w3.org/1998/Math/MathML">
            <ci> FLUX_VALUE </ci>
          </math>
          <listOfParameters>
            <parameter id="LOWER_BOUND" value="-1000" units="mmol_per_gDW_per_hr"/>
            <parameter id="UPPER_BOUND" value="1000" units="mmol_per_gDW_per_hr"/>
            <parameter id="OBJECTIVE_COEFFICIENT" value="0"/>
            <parameter id="FLUX_VALUE" value="0" units="mmol_per_gDW_per_hr"/>
          </listOfParameters>
        </kineticLaw>
      </reaction>
      <reaction id="R_ARI" name="arabinose ribose isomerase">
        <notes>
          <html xmlns="http://www.w3.org/1999/xhtml"><p>SUBSYSTEM: Membrane Metabolism</p></html>
        </notes>
        <listOfReactants>
          <speciesReference species="M_arpp_c"/>
        </listOfReactants>
        <listOfProducts>
          <speciesReference species="M_prpp_c"/>
        </listOfProducts>
        <kineticLaw>
          <math xmlns="http://www.w3.org/1998/Math/MathML">
            <ci> FLUX_VALUE </ci>
          </math>
          <listOfParameters>
            <parameter id="LOWER_BOUND" value="-1000" units="mmol_per_gDW_per_hr"/>
            <parameter id="UPPER_BOUND" value="1000" units="mmol_per_gDW_per_hr"/>
            <parameter id="OBJECTIVE_COEFFICIENT" value="0"/>
            <parameter id="FLUX_VALUE" value="0" units="mmol_per_gDW_per_hr"/>
          </listOfParameters>
        </kineticLaw>
      </reaction>
      <reaction id="R_ASAD" name="aspartate semialdehyde dehydrogenase">
        <notes>
          <html xmlns="http://www.w3.org/1999/xhtml"><p>GENE_ASSOCIATION: Rv3708c</p><p>GENE_LIST: Rv3708c</p><p>SUBSYSTEM: Glycine Serine and Threonine Metabolism</p></html>
        </notes>
        <listOfReactants>
          <speciesReference species="M_aspsa_c"/>
          <speciesReference species="M_nadp_c"/>
          <speciesReference species="M_pi_c"/>
        </listOfReactants>
        <listOfProducts>
          <speciesReference species="M_4pasp_c"/>
          <speciesReference species="M_h_c"/>
          <speciesReference species="M_nadph_c"/>
        </listOfProducts>
        <kineticLaw>
          <math xmlns="http://www.w3.org/1998/Math/MathML">
            <ci> FLUX_VALUE </ci>
          </math>
          <listOfParameters>
            <parameter id="LOWER_BOUND" value="-1000" units="mmol_per_gDW_per_hr"/>
            <parameter id="UPPER_BOUND" value="1000" units="mmol_per_gDW_per_hr"/>
            <parameter id="OBJECTIVE_COEFFICIENT" value="0"/>
            <parameter id="FLUX_VALUE" value="0" units="mmol_per_gDW_per_hr"/>
          </listOfParameters>
        </kineticLaw>
      </reaction>
      <reaction id="R_ASNN" name="L asparaginase" reversible="false">
        <notes>
          <html xmlns="http://www.w3.org/1999/xhtml"><p>GENE_ASSOCIATION: Rv1538c</p><p>GENE_LIST: Rv1538c</p><p>SUBSYSTEM: Alanine and Aspartate Metabolism</p></html>
        </notes>
        <listOfReactants>
          <speciesReference species="M_asn_L_c"/>
          <speciesReference species="M_h2o_c"/>
        </listOfReactants>
        <listOfProducts>
          <speciesReference species="M_asp_L_c"/>
          <speciesReference species="M_nh4_c"/>
        </listOfProducts>
        <kineticLaw>
          <math xmlns="http://www.w3.org/1998/Math/MathML">
            <ci> FLUX_VALUE </ci>
          </math>
          <listOfParameters>
            <parameter id="LOWER_BOUND" value="0" units="mmol_per_gDW_per_hr"/>
            <parameter id="UPPER_BOUND" value="1000" units="mmol_per_gDW_per_hr"/>
            <parameter id="OBJECTIVE_COEFFICIENT" value="0"/>
            <parameter id="FLUX_VALUE" value="5" units="mmol_per_gDW_per_hr"/>
          </listOfParameters>
        </kineticLaw>
      </reaction>
      <reaction id="R_ASNS1" name="asparagine synthase glutamine hydrolysing " reversible="false">
        <notes>
          <html xmlns="http://www.w3.org/1999/xhtml"><p>GENE_ASSOCIATION: Rv2201</p><p>GENE_LIST: Rv2201</p><p>SUBSYSTEM: Alanine and Aspartate Metabolism</p></html>
        </notes>
        <listOfReactants>
          <speciesReference species="M_asp_L_c"/>
          <speciesReference species="M_atp_c"/>
          <speciesReference species="M_gln_L_c"/>
          <speciesReference species="M_h2o_c"/>
        </listOfReactants>
        <listOfProducts>
          <speciesReference species="M_amp_c"/>
          <speciesReference species="M_asn_L_c"/>
          <speciesReference species="M_glu_L_c"/>
          <speciesReference species="M_h_c"/>
          <speciesReference species="M_ppi_c"/>
        </listOfProducts>
        <kineticLaw>
          <math xmlns="http://www.w3.org/1998/Math/MathML">
            <ci> FLUX_VALUE </ci>
          </math>
          <listOfParameters>
            <parameter id="LOWER_BOUND" value="0" units="mmol_per_gDW_per_hr"/>
            <parameter id="UPPER_BOUND" value="1000" units="mmol_per_gDW_per_hr"/>
            <parameter id="OBJECTIVE_COEFFICIENT" value="0"/>
            <parameter id="FLUX_VALUE" value="5" units="mmol_per_gDW_per_hr"/>
          </listOfParameters>
        </kineticLaw>
      </reaction>
      <reaction id="R_ASNt2r" name="L asparagine reversible transport via proton symport">
        <notes>
          <html xmlns="http://www.w3.org/1999/xhtml"><p>GENE_ASSOCIATION: ( Rv2127  or  Rv0346c )</p><p>GENE_LIST: Rv0346c Rv2127</p><p>SUBSYSTEM: Transport</p></html>
        </notes>
        <listOfReactants>
          <speciesReference species="M_asn_L_e"/>
          <speciesReference species="M_h_e"/>
        </listOfReactants>
        <listOfProducts>
          <speciesReference species="M_asn_L_c"/>
          <speciesReference species="M_h_c"/>
        </listOfProducts>
        <kineticLaw>
          <math xmlns="http://www.w3.org/1998/Math/MathML">
            <ci> FLUX_VALUE </ci>
          </math>
          <listOfParameters>
            <parameter id="LOWER_BOUND" value="-1000" units="mmol_per_gDW_per_hr"/>
            <parameter id="UPPER_BOUND" value="1000" units="mmol_per_gDW_per_hr"/>
            <parameter id="OBJECTIVE_COEFFICIENT" value="0"/>
            <parameter id="FLUX_VALUE" value="0" units="mmol_per_gDW_per_hr"/>
          </listOfParameters>
        </kineticLaw>
      </reaction>
      <reaction id="R_ASP1DC" name="aspartate 1 decarboxylase" reversible="false">
        <notes>
          <html xmlns="http://www.w3.org/1999/xhtml"><p>GENE_ASSOCIATION: Rv3601c</p><p>GENE_LIST: Rv3601c</p><p>SUBSYSTEM: Alanine and Aspartate Metabolism</p></html>
        </notes>
        <listOfReactants>
          <speciesReference species="M_asp_L_c"/>
          <speciesReference species="M_h_c"/>
        </listOfReactants>
        <listOfProducts>
          <speciesReference species="M_ala_B_c"/>
          <speciesReference species="M_co2_c"/>
        </listOfProducts>
        <kineticLaw>
          <math xmlns="http://www.w3.org/1998/Math/MathML">
            <ci> FLUX_VALUE </ci>
          </math>
          <listOfParameters>
            <parameter id="LOWER_BOUND" value="0" units="mmol_per_gDW_per_hr"/>
            <parameter id="UPPER_BOUND" value="1000" units="mmol_per_gDW_per_hr"/>
            <parameter id="OBJECTIVE_COEFFICIENT" value="0"/>
            <parameter id="FLUX_VALUE" value="5" units="mmol_per_gDW_per_hr"/>
          </listOfParameters>
        </kineticLaw>
      </reaction>
      <reaction id="R_ASPCT" name="aspartate carbamoyltransferase" reversible="false">
        <notes>
          <html xmlns="http://www.w3.org/1999/xhtml"><p>GENE_ASSOCIATION: Rv1380</p><p>GENE_LIST: Rv1380</p><p>SUBSYSTEM: Pyrimidine Metabolism</p></html>
        </notes>
        <listOfReactants>
          <speciesReference species="M_asp_L_c"/>
          <speciesReference species="M_cbp_c"/>
        </listOfReactants>
        <listOfProducts>
          <speciesReference species="M_cbasp_c"/>
          <speciesReference species="M_h_c"/>
          <speciesReference species="M_pi_c"/>
        </listOfProducts>
        <kineticLaw>
          <math xmlns="http://www.w3.org/1998/Math/MathML">
            <ci> FLUX_VALUE </ci>
          </math>
          <listOfParameters>
            <parameter id="LOWER_BOUND" value="0" units="mmol_per_gDW_per_hr"/>
            <parameter id="UPPER_BOUND" value="1000" units="mmol_per_gDW_per_hr"/>
            <parameter id="OBJECTIVE_COEFFICIENT" value="0"/>
            <parameter id="FLUX_VALUE" value="5" units="mmol_per_gDW_per_hr"/>
          </listOfParameters>
        </kineticLaw>
      </reaction>
      <reaction id="R_ASPK" name="aspartate kinase">
        <notes>
          <html xmlns="http://www.w3.org/1999/xhtml"><p>GENE_ASSOCIATION: Rv3709c</p><p>GENE_LIST: Rv3709c</p><p>SUBSYSTEM: Glycine Serine and Threonine Metabolism</p></html>
        </notes>
        <listOfReactants>
          <speciesReference species="M_asp_L_c"/>
          <speciesReference species="M_atp_c"/>
        </listOfReactants>
        <listOfProducts>
          <speciesReference species="M_4pasp_c"/>
          <speciesReference species="M_adp_c"/>
        </listOfProducts>
        <kineticLaw>
          <math xmlns="http://www.w3.org/1998/Math/MathML">
            <ci> FLUX_VALUE </ci>
          </math>
          <listOfParameters>
            <parameter id="LOWER_BOUND" value="-1000" units="mmol_per_gDW_per_hr"/>
            <parameter id="UPPER_BOUND" value="1000" units="mmol_per_gDW_per_hr"/>
            <parameter id="OBJECTIVE_COEFFICIENT" value="0"/>
            <parameter id="FLUX_VALUE" value="0" units="mmol_per_gDW_per_hr"/>
          </listOfParameters>
        </kineticLaw>
      </reaction>
      <reaction id="R_ASPO1" name="L aspartate oxidase" reversible="false">
        <notes>
          <html xmlns="http://www.w3.org/1999/xhtml"><p>GENE_ASSOCIATION: Rv1595</p><p>GENE_LIST: Rv1595</p><p>SUBSYSTEM: Alanine and Aspartate Metabolism</p></html>
        </notes>
        <listOfReactants>
          <speciesReference species="M_asp_L_c"/>
          <speciesReference species="M_h2o_c"/>
          <speciesReference species="M_o2_c"/>
        </listOfReactants>
        <listOfProducts>
          <speciesReference species="M_h2o2_c"/>
          <speciesReference species="M_nh4_c"/>
          <speciesReference species="M_oaa_c"/>
        </listOfProducts>
        <kineticLaw>
          <math xmlns="http://www.w3.org/1998/Math/MathML">
            <ci> FLUX_VALUE </ci>
          </math>
          <listOfParameters>
            <parameter id="LOWER_BOUND" value="0" units="mmol_per_gDW_per_hr"/>
            <parameter id="UPPER_BOUND" value="1000" units="mmol_per_gDW_per_hr"/>
            <parameter id="OBJECTIVE_COEFFICIENT" value="0"/>
            <parameter id="FLUX_VALUE" value="5" units="mmol_per_gDW_per_hr"/>
          </listOfParameters>
        </kineticLaw>
      </reaction>
      <reaction id="R_ASPO5" name="L aspartate oxidase" reversible="false">
        <notes>
          <html xmlns="http://www.w3.org/1999/xhtml"><p>GENE_ASSOCIATION: Rv1595</p><p>GENE_LIST: Rv1595</p><p>SUBSYSTEM: Alanine and Aspartate Metabolism</p></html>
        </notes>
        <listOfReactants>
          <speciesReference species="M_asp_L_c"/>
          <speciesReference species="M_fum_c"/>
        </listOfReactants>
        <listOfProducts>
          <speciesReference species="M_h_c"/>
          <speciesReference species="M_iasp_c"/>
          <speciesReference species="M_succ_c"/>
        </listOfProducts>
        <kineticLaw>
          <math xmlns="http://www.w3.org/1998/Math/MathML">
            <ci> FLUX_VALUE </ci>
          </math>
          <listOfParameters>
            <parameter id="LOWER_BOUND" value="0" units="mmol_per_gDW_per_hr"/>
            <parameter id="UPPER_BOUND" value="1000" units="mmol_per_gDW_per_hr"/>
            <parameter id="OBJECTIVE_COEFFICIENT" value="0"/>
            <parameter id="FLUX_VALUE" value="5" units="mmol_per_gDW_per_hr"/>
          </listOfParameters>
        </kineticLaw>
      </reaction>
      <reaction id="R_ASPTA" name="aspartate transaminase">
        <notes>
          <html xmlns="http://www.w3.org/1999/xhtml"><p>GENE_ASSOCIATION: ( Rv3565  or  Rv0337c )</p><p>GENE_LIST: Rv0337c Rv3565</p><p>SUBSYSTEM: Glutamate Metabolism</p></html>
        </notes>
        <listOfReactants>
          <speciesReference species="M_akg_c"/>
          <speciesReference species="M_asp_L_c"/>
        </listOfReactants>
        <listOfProducts>
          <speciesReference species="M_glu_L_c"/>
          <speciesReference species="M_oaa_c"/>
        </listOfProducts>
        <kineticLaw>
          <math xmlns="http://www.w3.org/1998/Math/MathML">
            <ci> FLUX_VALUE </ci>
          </math>
          <listOfParameters>
            <parameter id="LOWER_BOUND" value="-1000" units="mmol_per_gDW_per_hr"/>
            <parameter id="UPPER_BOUND" value="1000" units="mmol_per_gDW_per_hr"/>
            <parameter id="OBJECTIVE_COEFFICIENT" value="0"/>
            <parameter id="FLUX_VALUE" value="0" units="mmol_per_gDW_per_hr"/>
          </listOfParameters>
        </kineticLaw>
      </reaction>
      <reaction id="R_ASPt2r" name="L aspartate reversible transport via proton symport">
        <notes>
          <html xmlns="http://www.w3.org/1999/xhtml"><p>SUBSYSTEM: Transport</p></html>
        </notes>
        <listOfReactants>
          <speciesReference species="M_asp_L_e"/>
          <speciesReference species="M_h_e"/>
        </listOfReactants>
        <listOfProducts>
          <speciesReference species="M_asp_L_c"/>
          <speciesReference species="M_h_c"/>
        </listOfProducts>
        <kineticLaw>
          <math xmlns="http://www.w3.org/1998/Math/MathML">
            <ci> FLUX_VALUE </ci>
          </math>
          <listOfParameters>
            <parameter id="LOWER_BOUND" value="-1000" units="mmol_per_gDW_per_hr"/>
            <parameter id="UPPER_BOUND" value="1000" units="mmol_per_gDW_per_hr"/>
            <parameter id="OBJECTIVE_COEFFICIENT" value="0"/>
            <parameter id="FLUX_VALUE" value="0" units="mmol_per_gDW_per_hr"/>
          </listOfParameters>
        </kineticLaw>
      </reaction>
      <reaction id="R_AST" name="Arginine succinyltransferase" reversible="false">
        <notes>
          <html xmlns="http://www.w3.org/1999/xhtml"><p>SUBSYSTEM: Arginine and Proline Metabolism</p></html>
        </notes>
        <listOfReactants>
          <speciesReference species="M_arg_L_c"/>
          <speciesReference species="M_succoa_c"/>
        </listOfReactants>
        <listOfProducts>
          <speciesReference species="M_coa_c"/>
          <speciesReference species="M_h_c"/>
          <speciesReference species="M_sucarg_c"/>
        </listOfProducts>
        <kineticLaw>
          <math xmlns="http://www.w3.org/1998/Math/MathML">
            <ci> FLUX_VALUE </ci>
          </math>
          <listOfParameters>
            <parameter id="LOWER_BOUND" value="0" units="mmol_per_gDW_per_hr"/>
            <parameter id="UPPER_BOUND" value="1000" units="mmol_per_gDW_per_hr"/>
            <parameter id="OBJECTIVE_COEFFICIENT" value="0"/>
            <parameter id="FLUX_VALUE" value="5" units="mmol_per_gDW_per_hr"/>
          </listOfParameters>
        </kineticLaw>
      </reaction>
      <reaction id="R_ATPPRT" name="ATP phosphoribosyltransferase" reversible="false">
        <notes>
          <html xmlns="http://www.w3.org/1999/xhtml"><p>GENE_ASSOCIATION: Rv2121c</p><p>GENE_LIST: Rv2121c</p><p>SUBSYSTEM: Histidine Metabolism</p></html>
        </notes>
        <listOfReactants>
          <speciesReference species="M_atp_c"/>
          <speciesReference species="M_prpp_c"/>
        </listOfReactants>
        <listOfProducts>
          <speciesReference species="M_ppi_c"/>
          <speciesReference species="M_prbatp_c"/>
        </listOfProducts>
        <kineticLaw>
          <math xmlns="http://www.w3.org/1998/Math/MathML">
            <ci> FLUX_VALUE </ci>
          </math>
          <listOfParameters>
            <parameter id="LOWER_BOUND" value="0" units="mmol_per_gDW_per_hr"/>
            <parameter id="UPPER_BOUND" value="1000" units="mmol_per_gDW_per_hr"/>
            <parameter id="OBJECTIVE_COEFFICIENT" value="0"/>
            <parameter id="FLUX_VALUE" value="5" units="mmol_per_gDW_per_hr"/>
          </listOfParameters>
        </kineticLaw>
      </reaction>
      <reaction id="R_ATPS1" name="H exporting ATPase" reversible="false">
        <notes>
          <html xmlns="http://www.w3.org/1999/xhtml"><p>GENE_ASSOCIATION: ( Rv1304  and  Rv1305  and  Rv1306  and  Rv1307  and  Rv1308  and  Rv1309  and  Rv1310  and  Rv1311 )</p><p>GENE_LIST: Rv1304 Rv1305 Rv1306 Rv1307 Rv1308 Rv1309 Rv1310 Rv1311</p><p>SUBSYSTEM: Transport</p></html>
        </notes>
        <listOfReactants>
          <speciesReference species="M_atp_c"/>
          <speciesReference species="M_h2o_c"/>
          <speciesReference species="M_h_c"/>
        </listOfReactants>
        <listOfProducts>
          <speciesReference species="M_adp_c"/>
          <speciesReference species="M_h_e" stoichiometry="2"/>
          <speciesReference species="M_pi_c"/>
        </listOfProducts>
        <kineticLaw>
          <math xmlns="http://www.w3.org/1998/Math/MathML">
            <ci> FLUX_VALUE </ci>
          </math>
          <listOfParameters>
            <parameter id="LOWER_BOUND" value="0" units="mmol_per_gDW_per_hr"/>
            <parameter id="UPPER_BOUND" value="1000" units="mmol_per_gDW_per_hr"/>
            <parameter id="OBJECTIVE_COEFFICIENT" value="0"/>
            <parameter id="FLUX_VALUE" value="5" units="mmol_per_gDW_per_hr"/>
          </listOfParameters>
        </kineticLaw>
      </reaction>
      <reaction id="R_ATPS4r" name="ATP synthase four protons for one ATP ">
        <notes>
          <html xmlns="http://www.w3.org/1999/xhtml"><p>GENE_ASSOCIATION: ( Rv1304  and  Rv1305  and  Rv1306  and  Rv1307  and  Rv1308  and  Rv1309  and  Rv1310  and  Rv1311 )</p><p>GENE_LIST: Rv1304 Rv1305 Rv1306 Rv1307 Rv1308 Rv1309 Rv1310 Rv1311</p><p>SUBSYSTEM: Purine Metabolism</p></html>
        </notes>
        <listOfReactants>
          <speciesReference species="M_adp_c"/>
          <speciesReference species="M_h_e" stoichiometry="4"/>
          <speciesReference species="M_pi_c"/>
        </listOfReactants>
        <listOfProducts>
          <speciesReference species="M_atp_c"/>
          <speciesReference species="M_h2o_c"/>
          <speciesReference species="M_h_c" stoichiometry="3"/>
        </listOfProducts>
        <kineticLaw>
          <math xmlns="http://www.w3.org/1998/Math/MathML">
            <ci> FLUX_VALUE </ci>
          </math>
          <listOfParameters>
            <parameter id="LOWER_BOUND" value="-1000" units="mmol_per_gDW_per_hr"/>
            <parameter id="UPPER_BOUND" value="1000" units="mmol_per_gDW_per_hr"/>
            <parameter id="OBJECTIVE_COEFFICIENT" value="0"/>
            <parameter id="FLUX_VALUE" value="0" units="mmol_per_gDW_per_hr"/>
          </listOfParameters>
        </kineticLaw>
      </reaction>
      <reaction id="R_BACCL" name="biotin acetyl CoA carboxylase ligase" reversible="false">
        <notes>
          <html xmlns="http://www.w3.org/1999/xhtml"><p>GENE_ASSOCIATION: Rv3279c</p><p>GENE_LIST: Rv3279c</p><p>SUBSYSTEM: Biotin Metabolism</p></html>
        </notes>
        <listOfReactants>
          <speciesReference species="M_atp_c"/>
          <speciesReference species="M_btn_c"/>
          <speciesReference species="M_h_c"/>
        </listOfReactants>
        <listOfProducts>
          <speciesReference species="M_btamp_c"/>
          <speciesReference species="M_ppi_c"/>
        </listOfProducts>
        <kineticLaw>
          <math xmlns="http://www.w3.org/1998/Math/MathML">
            <ci> FLUX_VALUE </ci>
          </math>
          <listOfParameters>
            <parameter id="LOWER_BOUND" value="0" units="mmol_per_gDW_per_hr"/>
            <parameter id="UPPER_BOUND" value="1000" units="mmol_per_gDW_per_hr"/>
            <parameter id="OBJECTIVE_COEFFICIENT" value="0"/>
            <parameter id="FLUX_VALUE" value="5" units="mmol_per_gDW_per_hr"/>
          </listOfParameters>
        </kineticLaw>
      </reaction>
      <reaction id="R_BALAt2r" name="beta alanine reversible transport via proton symport">
        <notes>
          <html xmlns="http://www.w3.org/1999/xhtml"><p>GENE_ASSOCIATION: Rv0522</p><p>GENE_LIST: Rv0522</p><p>SUBSYSTEM: Transport</p></html>
        </notes>
        <listOfReactants>
          <speciesReference species="M_ala_B_e"/>
          <speciesReference species="M_h_e"/>
        </listOfReactants>
        <listOfProducts>
          <speciesReference species="M_ala_B_c"/>
          <speciesReference species="M_h_c"/>
        </listOfProducts>
        <kineticLaw>
          <math xmlns="http://www.w3.org/1998/Math/MathML">
            <ci> FLUX_VALUE </ci>
          </math>
          <listOfParameters>
            <parameter id="LOWER_BOUND" value="-1000" units="mmol_per_gDW_per_hr"/>
            <parameter id="UPPER_BOUND" value="1000" units="mmol_per_gDW_per_hr"/>
            <parameter id="OBJECTIVE_COEFFICIENT" value="0"/>
            <parameter id="FLUX_VALUE" value="0" units="mmol_per_gDW_per_hr"/>
          </listOfParameters>
        </kineticLaw>
      </reaction>
      <reaction id="R_BDH" name=" R 3 HydroxybutanoateNAD oxidoreductase">
        <notes>
          <html xmlns="http://www.w3.org/1999/xhtml"><p>SUBSYSTEM: Pyruvate Metabolism</p></html>
        </notes>
        <listOfReactants>
          <speciesReference species="M_bhb_c"/>
          <speciesReference species="M_nad_c"/>
        </listOfReactants>
        <listOfProducts>
          <speciesReference species="M_acac_c"/>
          <speciesReference species="M_h_c"/>
          <speciesReference species="M_nadh_c"/>
        </listOfProducts>
        <kineticLaw>
          <math xmlns="http://www.w3.org/1998/Math/MathML">
            <ci> FLUX_VALUE </ci>
          </math>
          <listOfParameters>
            <parameter id="LOWER_BOUND" value="-1000" units="mmol_per_gDW_per_hr"/>
            <parameter id="UPPER_BOUND" value="1000" units="mmol_per_gDW_per_hr"/>
            <parameter id="OBJECTIVE_COEFFICIENT" value="0"/>
            <parameter id="FLUX_VALUE" value="0" units="mmol_per_gDW_per_hr"/>
          </listOfParameters>
        </kineticLaw>
      </reaction>
      <reaction id="R_BETALDHx" name="betaine aldehyde dehydrogenase" reversible="false">
        <notes>
          <html xmlns="http://www.w3.org/1999/xhtml"><p>SUBSYSTEM: Other Amino Acid Metabolism</p></html>
        </notes>
        <listOfReactants>
          <speciesReference species="M_betald_c"/>
          <speciesReference species="M_h2o_c"/>
          <speciesReference species="M_nad_c"/>
        </listOfReactants>
        <listOfProducts>
          <speciesReference species="M_glyb_c"/>
          <speciesReference species="M_h_c" stoichiometry="2"/>
          <speciesReference species="M_nadh_c"/>
        </listOfProducts>
        <kineticLaw>
          <math xmlns="http://www.w3.org/1998/Math/MathML">
            <ci> FLUX_VALUE </ci>
          </math>
          <listOfParameters>
            <parameter id="LOWER_BOUND" value="0" units="mmol_per_gDW_per_hr"/>
            <parameter id="UPPER_BOUND" value="1000" units="mmol_per_gDW_per_hr"/>
            <parameter id="OBJECTIVE_COEFFICIENT" value="0"/>
            <parameter id="FLUX_VALUE" value="5" units="mmol_per_gDW_per_hr"/>
          </listOfParameters>
        </kineticLaw>
      </reaction>
      <reaction id="R_BMNMSHS" name="conjugated mycothiol synthesis" reversible="false">
        <notes>
          <html xmlns="http://www.w3.org/1999/xhtml"><p>SUBSYSTEM: Redox Metabolism</p></html>
        </notes>
        <listOfReactants>
          <speciesReference species="M_bmn_c"/>
          <speciesReference species="M_msh_c"/>
        </listOfReactants>
        <listOfProducts>
          <speciesReference species="M_bmnmsh_c"/>
          <speciesReference species="M_h_c" stoichiometry="2"/>
        </listOfProducts>
        <kineticLaw>
          <math xmlns="http://www.w3.org/1998/Math/MathML">
            <ci> FLUX_VALUE </ci>
          </math>
          <listOfParameters>
            <parameter id="LOWER_BOUND" value="0" units="mmol_per_gDW_per_hr"/>
            <parameter id="UPPER_BOUND" value="1000" units="mmol_per_gDW_per_hr"/>
            <parameter id="OBJECTIVE_COEFFICIENT" value="0"/>
            <parameter id="FLUX_VALUE" value="5" units="mmol_per_gDW_per_hr"/>
          </listOfParameters>
        </kineticLaw>
      </reaction>
      <reaction id="R_BMNt" name="bimane transport diffusion ">
        <notes>
          <html xmlns="http://www.w3.org/1999/xhtml"><p>SUBSYSTEM: Transport</p></html>
        </notes>
        <listOfReactants>
          <speciesReference species="M_bmn_c"/>
        </listOfReactants>
        <listOfProducts>
          <speciesReference species="M_bmn_e"/>
        </listOfProducts>
        <kineticLaw>
          <math xmlns="http://www.w3.org/1998/Math/MathML">
            <ci> FLUX_VALUE </ci>
          </math>
          <listOfParameters>
            <parameter id="LOWER_BOUND" value="-1000" units="mmol_per_gDW_per_hr"/>
            <parameter id="UPPER_BOUND" value="1000" units="mmol_per_gDW_per_hr"/>
            <parameter id="OBJECTIVE_COEFFICIENT" value="0"/>
            <parameter id="FLUX_VALUE" value="0" units="mmol_per_gDW_per_hr"/>
          </listOfParameters>
        </kineticLaw>
      </reaction>
      <reaction id="R_BPNT" name="3 5 bisphosphate nucleotidase" reversible="false">
        <notes>
          <html xmlns="http://www.w3.org/1999/xhtml"><p>SUBSYSTEM: Other Amino Acid Metabolism</p></html>
        </notes>
        <listOfReactants>
          <speciesReference species="M_h2o_c"/>
          <speciesReference species="M_pap_c"/>
        </listOfReactants>
        <listOfProducts>
          <speciesReference species="M_amp_c"/>
          <speciesReference species="M_pi_c"/>
        </listOfProducts>
        <kineticLaw>
          <math xmlns="http://www.w3.org/1998/Math/MathML">
            <ci> FLUX_VALUE </ci>
          </math>
          <listOfParameters>
            <parameter id="LOWER_BOUND" value="0" units="mmol_per_gDW_per_hr"/>
            <parameter id="UPPER_BOUND" value="1000" units="mmol_per_gDW_per_hr"/>
            <parameter id="OBJECTIVE_COEFFICIENT" value="0"/>
            <parameter id="FLUX_VALUE" value="5" units="mmol_per_gDW_per_hr"/>
          </listOfParameters>
        </kineticLaw>
      </reaction>
      <reaction id="R_BTS2" name="biotin synthase ala L producing ">
        <notes>
          <html xmlns="http://www.w3.org/1999/xhtml"><p>GENE_ASSOCIATION: Rv1589</p><p>GENE_LIST: Rv1589</p><p>SUBSYSTEM: Biotin Metabolism</p></html>
        </notes>
        <listOfReactants>
          <speciesReference species="M_cys_L_c"/>
          <speciesReference species="M_dtbt_c"/>
        </listOfReactants>
        <listOfProducts>
          <speciesReference species="M_ala_L_c"/>
          <speciesReference species="M_btn_c"/>
          <speciesReference species="M_h_c" stoichiometry="2"/>
        </listOfProducts>
        <kineticLaw>
          <math xmlns="http://www.w3.org/1998/Math/MathML">
            <ci> FLUX_VALUE </ci>
          </math>
          <listOfParameters>
            <parameter id="LOWER_BOUND" value="-1000" units="mmol_per_gDW_per_hr"/>
            <parameter id="UPPER_BOUND" value="1000" units="mmol_per_gDW_per_hr"/>
            <parameter id="OBJECTIVE_COEFFICIENT" value="0"/>
            <parameter id="FLUX_VALUE" value="0" units="mmol_per_gDW_per_hr"/>
          </listOfParameters>
        </kineticLaw>
      </reaction>
      <reaction id="R_BTS3r" name="biotin synthase">
        <notes>
          <html xmlns="http://www.w3.org/1999/xhtml"><p>GENE_ASSOCIATION: Rv1589</p><p>GENE_LIST: Rv1589</p><p>SUBSYSTEM: Biotin Metabolism</p></html>
        </notes>
        <listOfReactants>
          <speciesReference species="M_dtbt_c"/>
          <speciesReference species="M_s_c" stoichiometry="2"/>
        </listOfReactants>
        <listOfProducts>
          <speciesReference species="M_btn_c"/>
          <speciesReference species="M_h2s_c"/>
        </listOfProducts>
        <kineticLaw>
          <math xmlns="http://www.w3.org/1998/Math/MathML">
            <ci> FLUX_VALUE </ci>
          </math>
          <listOfParameters>
            <parameter id="LOWER_BOUND" value="-1000" units="mmol_per_gDW_per_hr"/>
            <parameter id="UPPER_BOUND" value="1000" units="mmol_per_gDW_per_hr"/>
            <parameter id="OBJECTIVE_COEFFICIENT" value="0"/>
            <parameter id="FLUX_VALUE" value="0" units="mmol_per_gDW_per_hr"/>
          </listOfParameters>
        </kineticLaw>
      </reaction>
      <reaction id="R_CAATPS" name="Ca ATPase" reversible="false">
        <notes>
          <html xmlns="http://www.w3.org/1999/xhtml"><p>GENE_ASSOCIATION: Rv0107c</p><p>GENE_LIST: Rv0107c</p><p>SUBSYSTEM: Transport</p></html>
        </notes>
        <listOfReactants>
          <speciesReference species="M_atp_c"/>
          <speciesReference species="M_ca2_c" stoichiometry="2"/>
          <speciesReference species="M_h2o_c"/>
        </listOfReactants>
        <listOfProducts>
          <speciesReference species="M_adp_c"/>
          <speciesReference species="M_ca2_e" stoichiometry="2"/>
          <speciesReference species="M_h_e"/>
          <speciesReference species="M_pi_c"/>
        </listOfProducts>
        <kineticLaw>
          <math xmlns="http://www.w3.org/1998/Math/MathML">
            <ci> FLUX_VALUE </ci>
          </math>
          <listOfParameters>
            <parameter id="LOWER_BOUND" value="0" units="mmol_per_gDW_per_hr"/>
            <parameter id="UPPER_BOUND" value="1000" units="mmol_per_gDW_per_hr"/>
            <parameter id="OBJECTIVE_COEFFICIENT" value="0"/>
            <parameter id="FLUX_VALUE" value="5" units="mmol_per_gDW_per_hr"/>
          </listOfParameters>
        </kineticLaw>
      </reaction>
      <reaction id="R_CAT" name="catalase" reversible="false">
        <notes>
          <html xmlns="http://www.w3.org/1999/xhtml"><p>GENE_ASSOCIATION: Rv1908c</p><p>GENE_LIST: Rv1908c</p><p>SUBSYSTEM: Redox Metabolism</p></html>
        </notes>
        <listOfReactants>
          <speciesReference species="M_h2o2_c" stoichiometry="2"/>
        </listOfReactants>
        <listOfProducts>
          <speciesReference species="M_h2o_c" stoichiometry="2"/>
          <speciesReference species="M_o2_c"/>
        </listOfProducts>
        <kineticLaw>
          <math xmlns="http://www.w3.org/1998/Math/MathML">
            <ci> FLUX_VALUE </ci>
          </math>
          <listOfParameters>
            <parameter id="LOWER_BOUND" value="0" units="mmol_per_gDW_per_hr"/>
            <parameter id="UPPER_BOUND" value="1000" units="mmol_per_gDW_per_hr"/>
            <parameter id="OBJECTIVE_COEFFICIENT" value="0"/>
            <parameter id="FLUX_VALUE" value="5" units="mmol_per_gDW_per_hr"/>
          </listOfParameters>
        </kineticLaw>
      </reaction>
      <reaction id="R_CAt4" name="calcium transport inout via proton antiporter">
        <notes>
          <html xmlns="http://www.w3.org/1999/xhtml"><p>GENE_ASSOCIATION: Rv1607</p><p>GENE_LIST: Rv1607</p><p>SUBSYSTEM: Transport</p></html>
        </notes>
        <listOfReactants>
          <speciesReference species="M_ca2_c"/>
          <speciesReference species="M_h_e"/>
        </listOfReactants>
        <listOfProducts>
          <speciesReference species="M_ca2_e"/>
          <speciesReference species="M_h_c"/>
        </listOfProducts>
        <kineticLaw>
          <math xmlns="http://www.w3.org/1998/Math/MathML">
            <ci> FLUX_VALUE </ci>
          </math>
          <listOfParameters>
            <parameter id="LOWER_BOUND" value="-1000" units="mmol_per_gDW_per_hr"/>
            <parameter id="UPPER_BOUND" value="1000" units="mmol_per_gDW_per_hr"/>
            <parameter id="OBJECTIVE_COEFFICIENT" value="0"/>
            <parameter id="FLUX_VALUE" value="0" units="mmol_per_gDW_per_hr"/>
          </listOfParameters>
        </kineticLaw>
      </reaction>
      <reaction id="R_CBIAT" name="Cobinamide adenyltransferase">
        <notes>
          <html xmlns="http://www.w3.org/1999/xhtml"><p>GENE_ASSOCIATION: Rv2849c</p><p>GENE_LIST: Rv2849c</p><p>SUBSYSTEM: Porphyrin Metabolism</p></html>
        </notes>
        <listOfReactants>
          <speciesReference species="M_atp_c"/>
          <speciesReference species="M_cbi_c"/>
          <speciesReference species="M_h_c"/>
        </listOfReactants>
        <listOfProducts>
          <speciesReference species="M_adocbi_c"/>
          <speciesReference species="M_pppi_c"/>
        </listOfProducts>
        <kineticLaw>
          <math xmlns="http://www.w3.org/1998/Math/MathML">
            <ci> FLUX_VALUE </ci>
          </math>
          <listOfParameters>
            <parameter id="LOWER_BOUND" value="-1000" units="mmol_per_gDW_per_hr"/>
            <parameter id="UPPER_BOUND" value="1000" units="mmol_per_gDW_per_hr"/>
            <parameter id="OBJECTIVE_COEFFICIENT" value="0"/>
            <parameter id="FLUX_VALUE" value="0" units="mmol_per_gDW_per_hr"/>
          </listOfParameters>
        </kineticLaw>
      </reaction>
      <reaction id="R_CBLAT" name="cob I alamin adenosyltransferase">
        <notes>
          <html xmlns="http://www.w3.org/1999/xhtml"><p>GENE_ASSOCIATION: Rv2849c</p><p>GENE_LIST: Rv2849c</p><p>SUBSYSTEM: Porphyrin Metabolism</p></html>
        </notes>
        <listOfReactants>
          <speciesReference species="M_atp_c"/>
          <speciesReference species="M_cbl1_c"/>
          <speciesReference species="M_h_c"/>
        </listOfReactants>
        <listOfProducts>
          <speciesReference species="M_adocbl_c"/>
          <speciesReference species="M_pppi_c"/>
        </listOfProducts>
        <kineticLaw>
          <math xmlns="http://www.w3.org/1998/Math/MathML">
            <ci> FLUX_VALUE </ci>
          </math>
          <listOfParameters>
            <parameter id="LOWER_BOUND" value="-1000" units="mmol_per_gDW_per_hr"/>
            <parameter id="UPPER_BOUND" value="1000" units="mmol_per_gDW_per_hr"/>
            <parameter id="OBJECTIVE_COEFFICIENT" value="0"/>
            <parameter id="FLUX_VALUE" value="0" units="mmol_per_gDW_per_hr"/>
          </listOfParameters>
        </kineticLaw>
      </reaction>
      <reaction id="R_CBPS" name="carbamoyl phosphate synthase glutamine hydrolysing " reversible="false">
        <notes>
          <html xmlns="http://www.w3.org/1999/xhtml"><p>GENE_ASSOCIATION: Rv1383</p><p>GENE_LIST: Rv1383</p><p>SUBSYSTEM: Pyrimidine Metabolism</p></html>
        </notes>
        <listOfReactants>
          <speciesReference species="M_atp_c" stoichiometry="2"/>
          <speciesReference species="M_gln_L_c"/>
          <speciesReference species="M_h2o_c"/>
          <speciesReference species="M_hco3_c"/>
        </listOfReactants>
        <listOfProducts>
          <speciesReference species="M_adp_c" stoichiometry="2"/>
          <speciesReference species="M_cbp_c"/>
          <speciesReference species="M_glu_L_c"/>
          <speciesReference species="M_h_c" stoichiometry="2"/>
          <speciesReference species="M_pi_c"/>
        </listOfProducts>
        <kineticLaw>
          <math xmlns="http://www.w3.org/1998/Math/MathML">
            <ci> FLUX_VALUE </ci>
          </math>
          <listOfParameters>
            <parameter id="LOWER_BOUND" value="0" units="mmol_per_gDW_per_hr"/>
            <parameter id="UPPER_BOUND" value="1000" units="mmol_per_gDW_per_hr"/>
            <parameter id="OBJECTIVE_COEFFICIENT" value="0"/>
            <parameter id="FLUX_VALUE" value="5" units="mmol_per_gDW_per_hr"/>
          </listOfParameters>
        </kineticLaw>
      </reaction>
      <reaction id="R_CDAPPA160" name="CDP Diacylglycerol pyrophostatase n C160 " reversible="false">
        <notes>
          <html xmlns="http://www.w3.org/1999/xhtml"><p>GENE_ASSOCIATION: Rv2289</p><p>GENE_LIST: Rv2289</p><p>SUBSYSTEM: Membrane Metabolism</p></html>
        </notes>
        <listOfReactants>
          <speciesReference species="M_cdpdhdecg_c"/>
          <speciesReference species="M_h2o_c"/>
        </listOfReactants>
        <listOfProducts>
          <speciesReference species="M_cmp_c"/>
          <speciesReference species="M_h_c" stoichiometry="2"/>
          <speciesReference species="M_pa160_c"/>
        </listOfProducts>
        <kineticLaw>
          <math xmlns="http://www.w3.org/1998/Math/MathML">
            <ci> FLUX_VALUE </ci>
          </math>
          <listOfParameters>
            <parameter id="LOWER_BOUND" value="0" units="mmol_per_gDW_per_hr"/>
            <parameter id="UPPER_BOUND" value="1000" units="mmol_per_gDW_per_hr"/>
            <parameter id="OBJECTIVE_COEFFICIENT" value="0"/>
            <parameter id="FLUX_VALUE" value="5" units="mmol_per_gDW_per_hr"/>
          </listOfParameters>
        </kineticLaw>
      </reaction>
      <reaction id="R_CDAPPA160190" name="CDP Diacylglycerol pyrophostatase C160 C190 " reversible="false">
        <notes>
          <html xmlns="http://www.w3.org/1999/xhtml"><p>GENE_ASSOCIATION: Rv2289</p><p>GENE_LIST: Rv2289</p><p>SUBSYSTEM: Membrane Metabolism</p></html>
        </notes>
        <listOfReactants>
          <speciesReference species="M_cdpc16c19g_c"/>
          <speciesReference species="M_h2o_c"/>
        </listOfReactants>
        <listOfProducts>
          <speciesReference species="M_cmp_c"/>
          <speciesReference species="M_h_c" stoichiometry="2"/>
          <speciesReference species="M_pa160190_c"/>
        </listOfProducts>
        <kineticLaw>
          <math xmlns="http://www.w3.org/1998/Math/MathML">
            <ci> FLUX_VALUE </ci>
          </math>
          <listOfParameters>
            <parameter id="LOWER_BOUND" value="0" units="mmol_per_gDW_per_hr"/>
            <parameter id="UPPER_BOUND" value="1000" units="mmol_per_gDW_per_hr"/>
            <parameter id="OBJECTIVE_COEFFICIENT" value="0"/>
            <parameter id="FLUX_VALUE" value="5" units="mmol_per_gDW_per_hr"/>
          </listOfParameters>
        </kineticLaw>
      </reaction>
      <reaction id="R_CDAPPA190" name="CDP Diacylglycerol pyrophostatase C190 " reversible="false">
        <notes>
          <html xmlns="http://www.w3.org/1999/xhtml"><p>GENE_ASSOCIATION: Rv2289</p><p>GENE_LIST: Rv2289</p><p>SUBSYSTEM: Membrane Metabolism</p></html>
        </notes>
        <listOfReactants>
          <speciesReference species="M_cdpc19c19g_c"/>
          <speciesReference species="M_h2o_c"/>
        </listOfReactants>
        <listOfProducts>
          <speciesReference species="M_cmp_c"/>
          <speciesReference species="M_h_c" stoichiometry="2"/>
          <speciesReference species="M_pa190190_c"/>
        </listOfProducts>
        <kineticLaw>
          <math xmlns="http://www.w3.org/1998/Math/MathML">
            <ci> FLUX_VALUE </ci>
          </math>
          <listOfParameters>
            <parameter id="LOWER_BOUND" value="0" units="mmol_per_gDW_per_hr"/>
            <parameter id="UPPER_BOUND" value="1000" units="mmol_per_gDW_per_hr"/>
            <parameter id="OBJECTIVE_COEFFICIENT" value="0"/>
            <parameter id="FLUX_VALUE" value="5" units="mmol_per_gDW_per_hr"/>
          </listOfParameters>
        </kineticLaw>
      </reaction>
      <reaction id="R_CDPMEK" name="4 cytidine 5 diphospho 2 C methyl D erythritol kinase" reversible="false">
        <notes>
          <html xmlns="http://www.w3.org/1999/xhtml"><p>GENE_ASSOCIATION: Rv1011</p><p>GENE_LIST: Rv1011</p><p>SUBSYSTEM: Polyprenyl Metabolism</p></html>
        </notes>
        <listOfReactants>
          <speciesReference species="M_4c2me_c"/>
          <speciesReference species="M_atp_c"/>
        </listOfReactants>
        <listOfProducts>
          <speciesReference species="M_2p4c2me_c"/>
          <speciesReference species="M_adp_c"/>
          <speciesReference species="M_h_c"/>
        </listOfProducts>
        <kineticLaw>
          <math xmlns="http://www.w3.org/1998/Math/MathML">
            <ci> FLUX_VALUE </ci>
          </math>
          <listOfParameters>
            <parameter id="LOWER_BOUND" value="0" units="mmol_per_gDW_per_hr"/>
            <parameter id="UPPER_BOUND" value="1000" units="mmol_per_gDW_per_hr"/>
            <parameter id="OBJECTIVE_COEFFICIENT" value="0"/>
            <parameter id="FLUX_VALUE" value="5" units="mmol_per_gDW_per_hr"/>
          </listOfParameters>
        </kineticLaw>
      </reaction>
      <reaction id="R_CDPPT160" name="CDP diacylglycerol inositon 3 phosphatidyltransferase" reversible="false">
        <notes>
          <html xmlns="http://www.w3.org/1999/xhtml"><p>GENE_ASSOCIATION: Rv2612c</p><p>GENE_LIST: Rv2612c</p><p>SUBSYSTEM: Membrane Metabolism</p></html>
        </notes>
        <listOfReactants>
          <speciesReference species="M_cdpdhdecg_c"/>
          <speciesReference species="M_inost_c"/>
        </listOfReactants>
        <listOfProducts>
          <speciesReference species="M_cmp_c"/>
          <speciesReference species="M_h_c"/>
          <speciesReference species="M_ptd1ino160_c"/>
        </listOfProducts>
        <kineticLaw>
          <math xmlns="http://www.w3.org/1998/Math/MathML">
            <ci> FLUX_VALUE </ci>
          </math>
          <listOfParameters>
            <parameter id="LOWER_BOUND" value="0" units="mmol_per_gDW_per_hr"/>
            <parameter id="UPPER_BOUND" value="1000" units="mmol_per_gDW_per_hr"/>
            <parameter id="OBJECTIVE_COEFFICIENT" value="0"/>
            <parameter id="FLUX_VALUE" value="5" units="mmol_per_gDW_per_hr"/>
          </listOfParameters>
        </kineticLaw>
      </reaction>
      <reaction id="R_CDPPT160190" name="CDP diacylglycerol inositon 3 phosphatidyltransferase" reversible="false">
        <notes>
          <html xmlns="http://www.w3.org/1999/xhtml"><p>GENE_ASSOCIATION: Rv2612c</p><p>GENE_LIST: Rv2612c</p><p>SUBSYSTEM: Membrane Metabolism</p></html>
        </notes>
        <listOfReactants>
          <speciesReference species="M_cdpc16c19g_c"/>
          <speciesReference species="M_inost_c"/>
        </listOfReactants>
        <listOfProducts>
          <speciesReference species="M_cmp_c"/>
          <speciesReference species="M_h_c"/>
          <speciesReference species="M_ptd1ino160190_c"/>
        </listOfProducts>
        <kineticLaw>
          <math xmlns="http://www.w3.org/1998/Math/MathML">
            <ci> FLUX_VALUE </ci>
          </math>
          <listOfParameters>
            <parameter id="LOWER_BOUND" value="0" units="mmol_per_gDW_per_hr"/>
            <parameter id="UPPER_BOUND" value="1000" units="mmol_per_gDW_per_hr"/>
            <parameter id="OBJECTIVE_COEFFICIENT" value="0"/>
            <parameter id="FLUX_VALUE" value="5" units="mmol_per_gDW_per_hr"/>
          </listOfParameters>
        </kineticLaw>
      </reaction>
      <reaction id="R_CHLabc" name="choline transport via ABC system" reversible="false">
        <notes>
          <html xmlns="http://www.w3.org/1999/xhtml"><p>GENE_ASSOCIATION: ( Rv3756c  and  Rv3757c  and  Rv3758c  and  Rv3759c )</p><p>GENE_LIST: Rv3756c Rv3757c Rv3758c Rv3759c</p><p>SUBSYSTEM: Transport</p></html>
        </notes>
        <listOfReactants>
          <speciesReference species="M_atp_c"/>
          <speciesReference species="M_chol_e"/>
          <speciesReference species="M_h2o_c"/>
        </listOfReactants>
        <listOfProducts>
          <speciesReference species="M_adp_c"/>
          <speciesReference species="M_chol_c"/>
          <speciesReference species="M_h_c"/>
          <speciesReference species="M_pi_c"/>
        </listOfProducts>
        <kineticLaw>
          <math xmlns="http://www.w3.org/1998/Math/MathML">
            <ci> FLUX_VALUE </ci>
          </math>
          <listOfParameters>
            <parameter id="LOWER_BOUND" value="0" units="mmol_per_gDW_per_hr"/>
            <parameter id="UPPER_BOUND" value="1000" units="mmol_per_gDW_per_hr"/>
            <parameter id="OBJECTIVE_COEFFICIENT" value="0"/>
            <parameter id="FLUX_VALUE" value="5" units="mmol_per_gDW_per_hr"/>
          </listOfParameters>
        </kineticLaw>
      </reaction>
      <reaction id="R_CHOLD" name="choline dehydrogenase" reversible="false">
        <notes>
          <html xmlns="http://www.w3.org/1999/xhtml"><p>SUBSYSTEM: Other Amino Acid Metabolism</p></html>
        </notes>
        <listOfReactants>
          <speciesReference species="M_chol_c"/>
          <speciesReference species="M_nad_c"/>
        </listOfReactants>
        <listOfProducts>
          <speciesReference species="M_betald_c"/>
          <speciesReference species="M_h_c"/>
          <speciesReference species="M_nadh_c"/>
        </listOfProducts>
        <kineticLaw>
          <math xmlns="http://www.w3.org/1998/Math/MathML">
            <ci> FLUX_VALUE </ci>
          </math>
          <listOfParameters>
            <parameter id="LOWER_BOUND" value="0" units="mmol_per_gDW_per_hr"/>
            <parameter id="UPPER_BOUND" value="1000" units="mmol_per_gDW_per_hr"/>
            <parameter id="OBJECTIVE_COEFFICIENT" value="0"/>
            <parameter id="FLUX_VALUE" value="5" units="mmol_per_gDW_per_hr"/>
          </listOfParameters>
        </kineticLaw>
      </reaction>
      <reaction id="R_CHORM" name="chorismate mutase" reversible="false">
        <notes>
          <html xmlns="http://www.w3.org/1999/xhtml"><p>GENE_ASSOCIATION: Rv1885c</p><p>GENE_LIST: Rv1885c</p><p>SUBSYSTEM: Phenylalanine Tyrosine Tryptophan Metabolism</p></html>
        </notes>
        <listOfReactants>
          <speciesReference species="M_chor_c"/>
        </listOfReactants>
        <listOfProducts>
          <speciesReference species="M_pphn_c"/>
        </listOfProducts>
        <kineticLaw>
          <math xmlns="http://www.w3.org/1998/Math/MathML">
            <ci> FLUX_VALUE </ci>
          </math>
          <listOfParameters>
            <parameter id="LOWER_BOUND" value="0" units="mmol_per_gDW_per_hr"/>
            <parameter id="UPPER_BOUND" value="1000" units="mmol_per_gDW_per_hr"/>
            <parameter id="OBJECTIVE_COEFFICIENT" value="0"/>
            <parameter id="FLUX_VALUE" value="5" units="mmol_per_gDW_per_hr"/>
          </listOfParameters>
        </kineticLaw>
      </reaction>
      <reaction id="R_CHORS" name="chorismate synthase" reversible="false">
        <notes>
          <html xmlns="http://www.w3.org/1999/xhtml"><p>GENE_ASSOCIATION: Rv2540c</p><p>GENE_LIST: Rv2540c</p><p>SUBSYSTEM: Phenylalanine Tyrosine Tryptophan Metabolism</p></html>
        </notes>
        <listOfReactants>
          <speciesReference species="M_3psme_c"/>
        </listOfReactants>
        <listOfProducts>
          <speciesReference species="M_chor_c"/>
          <speciesReference species="M_pi_c"/>
        </listOfProducts>
        <kineticLaw>
          <math xmlns="http://www.w3.org/1998/Math/MathML">
            <ci> FLUX_VALUE </ci>
          </math>
          <listOfParameters>
            <parameter id="LOWER_BOUND" value="0" units="mmol_per_gDW_per_hr"/>
            <parameter id="UPPER_BOUND" value="1000" units="mmol_per_gDW_per_hr"/>
            <parameter id="OBJECTIVE_COEFFICIENT" value="0"/>
            <parameter id="FLUX_VALUE" value="5" units="mmol_per_gDW_per_hr"/>
          </listOfParameters>
        </kineticLaw>
      </reaction>
      <reaction id="R_CHRPL" name="Chorismate pyruvate lyase" reversible="false">
        <notes>
          <html xmlns="http://www.w3.org/1999/xhtml"><p>GENE_ASSOCIATION: Rv2949c</p><p>GENE_LIST: Rv2949c</p><p>SUBSYSTEM: Membrane Metabolism</p></html>
        </notes>
        <listOfReactants>
          <speciesReference species="M_chor_c"/>
        </listOfReactants>
        <listOfProducts>
          <speciesReference species="M_4hbz_c"/>
          <speciesReference species="M_pyr_c"/>
        </listOfProducts>
        <kineticLaw>
          <math xmlns="http://www.w3.org/1998/Math/MathML">
            <ci> FLUX_VALUE </ci>
          </math>
          <listOfParameters>
            <parameter id="LOWER_BOUND" value="0" units="mmol_per_gDW_per_hr"/>
            <parameter id="UPPER_BOUND" value="1000" units="mmol_per_gDW_per_hr"/>
            <parameter id="OBJECTIVE_COEFFICIENT" value="0"/>
            <parameter id="FLUX_VALUE" value="5" units="mmol_per_gDW_per_hr"/>
          </listOfParameters>
        </kineticLaw>
      </reaction>
      <reaction id="R_CIGAMS" name="cys 1D myo inositol 2 deoxy D glucopyranoside synthase" reversible="false">
        <notes>
          <html xmlns="http://www.w3.org/1999/xhtml"><p>GENE_ASSOCIATION: Rv2130c</p><p>GENE_LIST: Rv2130c</p><p>SUBSYSTEM: Redox Metabolism</p></html>
        </notes>
        <listOfReactants>
          <speciesReference species="M_atp_c"/>
          <speciesReference species="M_cys_L_c"/>
          <speciesReference species="M_igam_c"/>
        </listOfReactants>
        <listOfProducts>
          <speciesReference species="M_amp_c"/>
          <speciesReference species="M_cigam_c"/>
          <speciesReference species="M_h_c" stoichiometry="2"/>
          <speciesReference species="M_ppi_c"/>
        </listOfProducts>
        <kineticLaw>
          <math xmlns="http://www.w3.org/1998/Math/MathML">
            <ci> FLUX_VALUE </ci>
          </math>
          <listOfParameters>
            <parameter id="LOWER_BOUND" value="0" units="mmol_per_gDW_per_hr"/>
            <parameter id="UPPER_BOUND" value="1000" units="mmol_per_gDW_per_hr"/>
            <parameter id="OBJECTIVE_COEFFICIENT" value="0"/>
            <parameter id="FLUX_VALUE" value="5" units="mmol_per_gDW_per_hr"/>
          </listOfParameters>
        </kineticLaw>
      </reaction>
      <reaction id="R_CITLr" name="Citrate lyase reversible ">
        <notes>
          <html xmlns="http://www.w3.org/1999/xhtml"><p>GENE_ASSOCIATION: ( Rv2498c  or  Rv2075c )</p><p>GENE_LIST: Rv2075c Rv2498c</p><p>SUBSYSTEM: Citric Acid Cycle</p></html>
        </notes>
        <listOfReactants>
          <speciesReference species="M_cit_c"/>
        </listOfReactants>
        <listOfProducts>
          <speciesReference species="M_ac_c"/>
          <speciesReference species="M_oaa_c"/>
        </listOfProducts>
        <kineticLaw>
          <math xmlns="http://www.w3.org/1998/Math/MathML">
            <ci> FLUX_VALUE </ci>
          </math>
          <listOfParameters>
            <parameter id="LOWER_BOUND" value="-1000" units="mmol_per_gDW_per_hr"/>
            <parameter id="UPPER_BOUND" value="1000" units="mmol_per_gDW_per_hr"/>
            <parameter id="OBJECTIVE_COEFFICIENT" value="0"/>
            <parameter id="FLUX_VALUE" value="0" units="mmol_per_gDW_per_hr"/>
          </listOfParameters>
        </kineticLaw>
      </reaction>
      <reaction id="R_CITabc" name="citrate transport via ABC system" reversible="false">
        <notes>
          <html xmlns="http://www.w3.org/1999/xhtml"><p>SUBSYSTEM: Transport</p></html>
        </notes>
        <listOfReactants>
          <speciesReference species="M_atp_c"/>
          <speciesReference species="M_cit_e"/>
          <speciesReference species="M_h2o_c"/>
        </listOfReactants>
        <listOfProducts>
          <speciesReference species="M_adp_c"/>
          <speciesReference species="M_cit_c"/>
          <speciesReference species="M_h_c"/>
          <speciesReference species="M_pi_c"/>
        </listOfProducts>
        <kineticLaw>
          <math xmlns="http://www.w3.org/1998/Math/MathML">
            <ci> FLUX_VALUE </ci>
          </math>
          <listOfParameters>
            <parameter id="LOWER_BOUND" value="0" units="mmol_per_gDW_per_hr"/>
            <parameter id="UPPER_BOUND" value="1000" units="mmol_per_gDW_per_hr"/>
            <parameter id="OBJECTIVE_COEFFICIENT" value="0"/>
            <parameter id="FLUX_VALUE" value="5" units="mmol_per_gDW_per_hr"/>
          </listOfParameters>
        </kineticLaw>
      </reaction>
      <reaction id="R_CLPNS160190" name="cardiolipin synthase C160 C190 tuberculosis">
        <notes>
          <html xmlns="http://www.w3.org/1999/xhtml"><p>SUBSYSTEM: Membrane Metabolism</p></html>
        </notes>
        <listOfReactants>
          <speciesReference species="M_pg160190_c" stoichiometry="2"/>
        </listOfReactants>
        <listOfProducts>
          <speciesReference species="M_clpn160190_c"/>
          <speciesReference species="M_glyc_c"/>
        </listOfProducts>
        <kineticLaw>
          <math xmlns="http://www.w3.org/1998/Math/MathML">
            <ci> FLUX_VALUE </ci>
          </math>
          <listOfParameters>
            <parameter id="LOWER_BOUND" value="-1000" units="mmol_per_gDW_per_hr"/>
            <parameter id="UPPER_BOUND" value="1000" units="mmol_per_gDW_per_hr"/>
            <parameter id="OBJECTIVE_COEFFICIENT" value="0"/>
            <parameter id="FLUX_VALUE" value="0" units="mmol_per_gDW_per_hr"/>
          </listOfParameters>
        </kineticLaw>
      </reaction>
      <reaction id="R_CMCBTFL" name="carboxymycobactin Fe3 loading" reversible="false">
        <notes>
          <html xmlns="http://www.w3.org/1999/xhtml"><p>SUBSYSTEM: Redox Metabolism</p></html>
        </notes>
        <listOfReactants>
          <speciesReference species="M_cmcbtt_c"/>
          <speciesReference species="M_fe3_e"/>
        </listOfReactants>
        <listOfProducts>
          <speciesReference species="M_fcmcbtt_c"/>
        </listOfProducts>
        <kineticLaw>
          <math xmlns="http://www.w3.org/1998/Math/MathML">
            <ci> FLUX_VALUE </ci>
          </math>
          <listOfParameters>
            <parameter id="LOWER_BOUND" value="0" units="mmol_per_gDW_per_hr"/>
            <parameter id="UPPER_BOUND" value="1000" units="mmol_per_gDW_per_hr"/>
            <parameter id="OBJECTIVE_COEFFICIENT" value="0"/>
            <parameter id="FLUX_VALUE" value="5" units="mmol_per_gDW_per_hr"/>
          </listOfParameters>
        </kineticLaw>
      </reaction>
      <reaction id="R_CMCBTFU" name="carboxymycobactin Fe3 unloading" reversible="false">
        <notes>
          <html xmlns="http://www.w3.org/1999/xhtml"><p>SUBSYSTEM: Redox Metabolism</p></html>
        </notes>
        <listOfReactants>
          <speciesReference species="M_fcmcbtt_c"/>
        </listOfReactants>
        <listOfProducts>
          <speciesReference species="M_cmcbtt_c"/>
          <speciesReference species="M_fe3_c"/>
        </listOfProducts>
        <kineticLaw>
          <math xmlns="http://www.w3.org/1998/Math/MathML">
            <ci> FLUX_VALUE </ci>
          </math>
          <listOfParameters>
            <parameter id="LOWER_BOUND" value="0" units="mmol_per_gDW_per_hr"/>
            <parameter id="UPPER_BOUND" value="1000" units="mmol_per_gDW_per_hr"/>
            <parameter id="OBJECTIVE_COEFFICIENT" value="0"/>
            <parameter id="FLUX_VALUE" value="5" units="mmol_per_gDW_per_hr"/>
          </listOfParameters>
        </kineticLaw>
      </reaction>
      <reaction id="R_CMLDC" name="4 carboxymuconolactone decarboxylase" reversible="false">
        <notes>
          <html xmlns="http://www.w3.org/1999/xhtml"><p>GENE_ASSOCIATION: Rv0771</p><p>GENE_LIST: Rv0771</p><p>SUBSYSTEM: Miscellaneous</p></html>
        </notes>
        <listOfReactants>
          <speciesReference species="M_2c25dho_c"/>
        </listOfReactants>
        <listOfProducts>
          <speciesReference species="M_5odhf2a_c"/>
          <speciesReference species="M_co2_c"/>
          <speciesReference species="M_h_c"/>
        </listOfProducts>
        <kineticLaw>
          <math xmlns="http://www.w3.org/1998/Math/MathML">
            <ci> FLUX_VALUE </ci>
          </math>
          <listOfParameters>
            <parameter id="LOWER_BOUND" value="0" units="mmol_per_gDW_per_hr"/>
            <parameter id="UPPER_BOUND" value="1000" units="mmol_per_gDW_per_hr"/>
            <parameter id="OBJECTIVE_COEFFICIENT" value="0"/>
            <parameter id="FLUX_VALUE" value="5" units="mmol_per_gDW_per_hr"/>
          </listOfParameters>
        </kineticLaw>
      </reaction>
      <reaction id="R_CO2t" name="CO2 transporter via diffusion">
        <notes>
          <html xmlns="http://www.w3.org/1999/xhtml"><p>SUBSYSTEM: Transport</p></html>
        </notes>
        <listOfReactants>
          <speciesReference species="M_co2_e"/>
        </listOfReactants>
        <listOfProducts>
          <speciesReference species="M_co2_c"/>
        </listOfProducts>
        <kineticLaw>
          <math xmlns="http://www.w3.org/1998/Math/MathML">
            <ci> FLUX_VALUE </ci>
          </math>
          <listOfParameters>
            <parameter id="LOWER_BOUND" value="-1000" units="mmol_per_gDW_per_hr"/>
            <parameter id="UPPER_BOUND" value="1000" units="mmol_per_gDW_per_hr"/>
            <parameter id="OBJECTIVE_COEFFICIENT" value="0"/>
            <parameter id="FLUX_VALUE" value="0" units="mmol_per_gDW_per_hr"/>
          </listOfParameters>
        </kineticLaw>
      </reaction>
      <reaction id="R_COAt" name="CoA transporter">
        <notes>
          <html xmlns="http://www.w3.org/1999/xhtml"><p>SUBSYSTEM: Transport</p></html>
        </notes>
        <listOfReactants>
          <speciesReference species="M_coa_e"/>
        </listOfReactants>
        <listOfProducts>
          <speciesReference species="M_coa_c"/>
        </listOfProducts>
        <kineticLaw>
          <math xmlns="http://www.w3.org/1998/Math/MathML">
            <ci> FLUX_VALUE </ci>
          </math>
          <listOfParameters>
            <parameter id="LOWER_BOUND" value="-1000" units="mmol_per_gDW_per_hr"/>
            <parameter id="UPPER_BOUND" value="1000" units="mmol_per_gDW_per_hr"/>
            <parameter id="OBJECTIVE_COEFFICIENT" value="0"/>
            <parameter id="FLUX_VALUE" value="0" units="mmol_per_gDW_per_hr"/>
          </listOfParameters>
        </kineticLaw>
      </reaction>
      <reaction id="R_COBALTt5" name="cobalt transport inout via permease no H ">
        <notes>
          <html xmlns="http://www.w3.org/1999/xhtml"><p>GENE_ASSOCIATION: Rv1239c</p><p>GENE_LIST: Rv1239c</p><p>SUBSYSTEM: Transport</p></html>
        </notes>
        <listOfReactants>
          <speciesReference species="M_cobalt2_c"/>
        </listOfReactants>
        <listOfProducts>
          <speciesReference species="M_cobalt2_e"/>
        </listOfProducts>
        <kineticLaw>
          <math xmlns="http://www.w3.org/1998/Math/MathML">
            <ci> FLUX_VALUE </ci>
          </math>
          <listOfParameters>
            <parameter id="LOWER_BOUND" value="-1000" units="mmol_per_gDW_per_hr"/>
            <parameter id="UPPER_BOUND" value="1000" units="mmol_per_gDW_per_hr"/>
            <parameter id="OBJECTIVE_COEFFICIENT" value="0"/>
            <parameter id="FLUX_VALUE" value="0" units="mmol_per_gDW_per_hr"/>
          </listOfParameters>
        </kineticLaw>
      </reaction>
      <reaction id="R_COCHL" name="cobaltochelatase" reversible="false">
        <notes>
          <html xmlns="http://www.w3.org/1999/xhtml"><p>GENE_ASSOCIATION: Rv2062c</p><p>GENE_LIST: Rv2062c</p><p>SUBSYSTEM: Porphyrin Metabolism</p></html>
        </notes>
        <listOfReactants>
          <speciesReference species="M_atp_c"/>
          <speciesReference species="M_cobalt2_c"/>
          <speciesReference species="M_h2o_c"/>
          <speciesReference species="M_hgbam_c"/>
        </listOfReactants>
        <listOfProducts>
          <speciesReference species="M_adp_c"/>
          <speciesReference species="M_co2dam_c"/>
          <speciesReference species="M_h_c" stoichiometry="2"/>
          <speciesReference species="M_pi_c"/>
        </listOfProducts>
        <kineticLaw>
          <math xmlns="http://www.w3.org/1998/Math/MathML">
            <ci> FLUX_VALUE </ci>
          </math>
          <listOfParameters>
            <parameter id="LOWER_BOUND" value="0" units="mmol_per_gDW_per_hr"/>
            <parameter id="UPPER_BOUND" value="1000" units="mmol_per_gDW_per_hr"/>
            <parameter id="OBJECTIVE_COEFFICIENT" value="0"/>
            <parameter id="FLUX_VALUE" value="5" units="mmol_per_gDW_per_hr"/>
          </listOfParameters>
        </kineticLaw>
      </reaction>
      <reaction id="R_CODH2r" name="carbon monoxide dehydrogenase acetyl CoA synthase 2">
        <notes>
          <html xmlns="http://www.w3.org/1999/xhtml"><p>GENE_ASSOCIATION: ( Rv0373c  and  Rv0374c  and  Rv0375c )</p><p>GENE_LIST: Rv0373c Rv0374c Rv0375c</p><p>SUBSYSTEM: Redox Metabolism</p></html>
        </notes>
        <listOfReactants>
          <speciesReference species="M_co_c"/>
          <speciesReference species="M_fdox_c" stoichiometry="2"/>
          <speciesReference species="M_h2o_c"/>
        </listOfReactants>
        <listOfProducts>
          <speciesReference species="M_co2_c"/>
          <speciesReference species="M_fdred_c" stoichiometry="2"/>
          <speciesReference species="M_h_c" stoichiometry="2"/>
        </listOfProducts>
        <kineticLaw>
          <math xmlns="http://www.w3.org/1998/Math/MathML">
            <ci> FLUX_VALUE </ci>
          </math>
          <listOfParameters>
            <parameter id="LOWER_BOUND" value="-1000" units="mmol_per_gDW_per_hr"/>
            <parameter id="UPPER_BOUND" value="1000" units="mmol_per_gDW_per_hr"/>
            <parameter id="OBJECTIVE_COEFFICIENT" value="0"/>
            <parameter id="FLUX_VALUE" value="0" units="mmol_per_gDW_per_hr"/>
          </listOfParameters>
        </kineticLaw>
      </reaction>
      <reaction id="R_CODH3" name="carbon monoxide dehydrogenase acetyl CoA synthase 2" reversible="false">
        <notes>
          <html xmlns="http://www.w3.org/1999/xhtml"><p>GENE_ASSOCIATION: ( Rv0373c  and  Rv0374c  and  Rv0375c )</p><p>GENE_LIST: Rv0373c Rv0374c Rv0375c</p><p>SUBSYSTEM: Redox Metabolism</p></html>
        </notes>
        <listOfReactants>
          <speciesReference species="M_adfdOX_c"/>
          <speciesReference species="M_co_c" stoichiometry="2"/>
          <speciesReference species="M_h2o_c" stoichiometry="2"/>
        </listOfReactants>
        <listOfProducts>
          <speciesReference species="M_adfdRD_c"/>
          <speciesReference species="M_co2_c" stoichiometry="2"/>
          <speciesReference species="M_h_c" stoichiometry="2"/>
        </listOfProducts>
        <kineticLaw>
          <math xmlns="http://www.w3.org/1998/Math/MathML">
            <ci> FLUX_VALUE </ci>
          </math>
          <listOfParameters>
            <parameter id="LOWER_BOUND" value="0" units="mmol_per_gDW_per_hr"/>
            <parameter id="UPPER_BOUND" value="1000" units="mmol_per_gDW_per_hr"/>
            <parameter id="OBJECTIVE_COEFFICIENT" value="0"/>
            <parameter id="FLUX_VALUE" value="5" units="mmol_per_gDW_per_hr"/>
          </listOfParameters>
        </kineticLaw>
      </reaction>
      <reaction id="R_COt" name="CO transporter via diffusion">
        <notes>
          <html xmlns="http://www.w3.org/1999/xhtml"><p>SUBSYSTEM: Transport</p></html>
        </notes>
        <listOfReactants>
          <speciesReference species="M_co_c"/>
        </listOfReactants>
        <listOfProducts>
          <speciesReference species="M_co_e"/>
        </listOfProducts>
        <kineticLaw>
          <math xmlns="http://www.w3.org/1998/Math/MathML">
            <ci> FLUX_VALUE </ci>
          </math>
          <listOfParameters>
            <parameter id="LOWER_BOUND" value="-1000" units="mmol_per_gDW_per_hr"/>
            <parameter id="UPPER_BOUND" value="1000" units="mmol_per_gDW_per_hr"/>
            <parameter id="OBJECTIVE_COEFFICIENT" value="0"/>
            <parameter id="FLUX_VALUE" value="0" units="mmol_per_gDW_per_hr"/>
          </listOfParameters>
        </kineticLaw>
      </reaction>
      <reaction id="R_CPC2MT" name="precorrin 2 C20 methyltransferase" reversible="false">
        <notes>
          <html xmlns="http://www.w3.org/1999/xhtml"><p>GENE_ASSOCIATION: Rv2066</p><p>GENE_LIST: Rv2066</p><p>SUBSYSTEM: Porphyrin Metabolism</p></html>
        </notes>
        <listOfReactants>
          <speciesReference species="M_amet_c"/>
          <speciesReference species="M_copre2_c"/>
        </listOfReactants>
        <listOfProducts>
          <speciesReference species="M_ahcys_c"/>
          <speciesReference species="M_copre3_c"/>
          <speciesReference species="M_h_c"/>
        </listOfProducts>
        <kineticLaw>
          <math xmlns="http://www.w3.org/1998/Math/MathML">
            <ci> FLUX_VALUE </ci>
          </math>
          <listOfParameters>
            <parameter id="LOWER_BOUND" value="0" units="mmol_per_gDW_per_hr"/>
            <parameter id="UPPER_BOUND" value="1000" units="mmol_per_gDW_per_hr"/>
            <parameter id="OBJECTIVE_COEFFICIENT" value="0"/>
            <parameter id="FLUX_VALUE" value="5" units="mmol_per_gDW_per_hr"/>
          </listOfParameters>
        </kineticLaw>
      </reaction>
      <reaction id="R_CPC3MT" name="precorrin 3B C17 methyltransferase" reversible="false">
        <notes>
          <html xmlns="http://www.w3.org/1999/xhtml"><p>GENE_ASSOCIATION: Rv2066</p><p>GENE_LIST: Rv2066</p><p>SUBSYSTEM: Porphyrin Metabolism</p></html>
        </notes>
        <listOfReactants>
          <speciesReference species="M_amet_c"/>
          <speciesReference species="M_copre3_c"/>
        </listOfReactants>
        <listOfProducts>
          <speciesReference species="M_ahcys_c"/>
          <speciesReference species="M_copre4_c"/>
        </listOfProducts>
        <kineticLaw>
          <math xmlns="http://www.w3.org/1998/Math/MathML">
            <ci> FLUX_VALUE </ci>
          </math>
          <listOfParameters>
            <parameter id="LOWER_BOUND" value="0" units="mmol_per_gDW_per_hr"/>
            <parameter id="UPPER_BOUND" value="1000" units="mmol_per_gDW_per_hr"/>
            <parameter id="OBJECTIVE_COEFFICIENT" value="0"/>
            <parameter id="FLUX_VALUE" value="5" units="mmol_per_gDW_per_hr"/>
          </listOfParameters>
        </kineticLaw>
      </reaction>
      <reaction id="R_CPC4MT" name="precorrin 4 C11 methyltransferase" reversible="false">
        <notes>
          <html xmlns="http://www.w3.org/1999/xhtml"><p>GENE_ASSOCIATION: Rv2071c</p><p>GENE_LIST: Rv2071c</p><p>SUBSYSTEM: Porphyrin Metabolism</p></html>
        </notes>
        <listOfReactants>
          <speciesReference species="M_amet_c"/>
          <speciesReference species="M_copre4_c"/>
        </listOfReactants>
        <listOfProducts>
          <speciesReference species="M_ahcys_c"/>
          <speciesReference species="M_copre5_c"/>
          <speciesReference species="M_h_c"/>
        </listOfProducts>
        <kineticLaw>
          <math xmlns="http://www.w3.org/1998/Math/MathML">
            <ci> FLUX_VALUE </ci>
          </math>
          <listOfParameters>
            <parameter id="LOWER_BOUND" value="0" units="mmol_per_gDW_per_hr"/>
            <parameter id="UPPER_BOUND" value="1000" units="mmol_per_gDW_per_hr"/>
            <parameter id="OBJECTIVE_COEFFICIENT" value="0"/>
            <parameter id="FLUX_VALUE" value="5" units="mmol_per_gDW_per_hr"/>
          </listOfParameters>
        </kineticLaw>
      </reaction>
      <reaction id="R_CPC6MT" name="precorrin 6Y C5 15 methyltransferase decarboxylating " reversible="false">
        <notes>
          <html xmlns="http://www.w3.org/1999/xhtml"><p>GENE_ASSOCIATION: Rv2072c</p><p>GENE_LIST: Rv2072c</p><p>SUBSYSTEM: Porphyrin Metabolism</p></html>
        </notes>
        <listOfReactants>
          <speciesReference species="M_amet_c" stoichiometry="2"/>
          <speciesReference species="M_codhpre6_c"/>
        </listOfReactants>
        <listOfProducts>
          <speciesReference species="M_ahcys_c" stoichiometry="2"/>
          <speciesReference species="M_co2_c"/>
          <speciesReference species="M_copre8_c"/>
          <speciesReference species="M_h_c"/>
        </listOfProducts>
        <kineticLaw>
          <math xmlns="http://www.w3.org/1998/Math/MathML">
            <ci> FLUX_VALUE </ci>
          </math>
          <listOfParameters>
            <parameter id="LOWER_BOUND" value="0" units="mmol_per_gDW_per_hr"/>
            <parameter id="UPPER_BOUND" value="1000" units="mmol_per_gDW_per_hr"/>
            <parameter id="OBJECTIVE_COEFFICIENT" value="0"/>
            <parameter id="FLUX_VALUE" value="5" units="mmol_per_gDW_per_hr"/>
          </listOfParameters>
        </kineticLaw>
      </reaction>
      <reaction id="R_CPC6R" name="precorrin 6A reductase" reversible="false">
        <notes>
          <html xmlns="http://www.w3.org/1999/xhtml"><p>GENE_ASSOCIATION: Rv2070c</p><p>GENE_LIST: Rv2070c</p><p>SUBSYSTEM: Porphyrin Metabolism</p></html>
        </notes>
        <listOfReactants>
          <speciesReference species="M_copre6_c"/>
          <speciesReference species="M_h_c"/>
          <speciesReference species="M_nadph_c"/>
        </listOfReactants>
        <listOfProducts>
          <speciesReference species="M_codhpre6_c"/>
          <speciesReference species="M_nadp_c"/>
        </listOfProducts>
        <kineticLaw>
          <math xmlns="http://www.w3.org/1998/Math/MathML">
            <ci> FLUX_VALUE </ci>
          </math>
          <listOfParameters>
            <parameter id="LOWER_BOUND" value="0" units="mmol_per_gDW_per_hr"/>
            <parameter id="UPPER_BOUND" value="1000" units="mmol_per_gDW_per_hr"/>
            <parameter id="OBJECTIVE_COEFFICIENT" value="0"/>
            <parameter id="FLUX_VALUE" value="5" units="mmol_per_gDW_per_hr"/>
          </listOfParameters>
        </kineticLaw>
      </reaction>
      <reaction id="R_CPC8MM" name="precorrin 8X methylmutase">
        <notes>
          <html xmlns="http://www.w3.org/1999/xhtml"><p>GENE_ASSOCIATION: Rv2065</p><p>GENE_LIST: Rv2065</p><p>SUBSYSTEM: Porphyrin Metabolism</p></html>
        </notes>
        <listOfReactants>
          <speciesReference species="M_copre8_c"/>
        </listOfReactants>
        <listOfProducts>
          <speciesReference species="M_cobya_c"/>
        </listOfProducts>
        <kineticLaw>
          <math xmlns="http://www.w3.org/1998/Math/MathML">
            <ci> FLUX_VALUE </ci>
          </math>
          <listOfParameters>
            <parameter id="LOWER_BOUND" value="-1000" units="mmol_per_gDW_per_hr"/>
            <parameter id="UPPER_BOUND" value="1000" units="mmol_per_gDW_per_hr"/>
            <parameter id="OBJECTIVE_COEFFICIENT" value="0"/>
            <parameter id="FLUX_VALUE" value="0" units="mmol_per_gDW_per_hr"/>
          </listOfParameters>
        </kineticLaw>
      </reaction>
      <reaction id="R_CPPPGO" name="coproporphyrinogen oxidase O2 required " reversible="false">
        <notes>
          <html xmlns="http://www.w3.org/1999/xhtml"><p>GENE_ASSOCIATION: Rv2388c</p><p>GENE_LIST: Rv2388c</p><p>SUBSYSTEM: Porphyrin Metabolism</p></html>
        </notes>
        <listOfReactants>
          <speciesReference species="M_cpppg3_c"/>
          <speciesReference species="M_h_c" stoichiometry="2"/>
          <speciesReference species="M_o2_c"/>
        </listOfReactants>
        <listOfProducts>
          <speciesReference species="M_co2_c" stoichiometry="2"/>
          <speciesReference species="M_h2o_c" stoichiometry="2"/>
          <speciesReference species="M_pppg9_c"/>
        </listOfProducts>
        <kineticLaw>
          <math xmlns="http://www.w3.org/1998/Math/MathML">
            <ci> FLUX_VALUE </ci>
          </math>
          <listOfParameters>
            <parameter id="LOWER_BOUND" value="0" units="mmol_per_gDW_per_hr"/>
            <parameter id="UPPER_BOUND" value="1000" units="mmol_per_gDW_per_hr"/>
            <parameter id="OBJECTIVE_COEFFICIENT" value="0"/>
            <parameter id="FLUX_VALUE" value="5" units="mmol_per_gDW_per_hr"/>
          </listOfParameters>
        </kineticLaw>
      </reaction>
      <reaction id="R_CRNabc" name="L carnitine transport via ABC system" reversible="false">
        <notes>
          <html xmlns="http://www.w3.org/1999/xhtml"><p>GENE_ASSOCIATION: ( Rv3756c  and  Rv3757c  and  Rv3758c  and  Rv3759c )</p><p>GENE_LIST: Rv3756c Rv3757c Rv3758c Rv3759c</p><p>SUBSYSTEM: Transport</p></html>
        </notes>
        <listOfReactants>
          <speciesReference species="M_atp_c"/>
          <speciesReference species="M_crn_e"/>
          <speciesReference species="M_h2o_c"/>
        </listOfReactants>
        <listOfProducts>
          <speciesReference species="M_adp_c"/>
          <speciesReference species="M_crn_c"/>
          <speciesReference species="M_h_c"/>
          <speciesReference species="M_pi_c"/>
        </listOfProducts>
        <kineticLaw>
          <math xmlns="http://www.w3.org/1998/Math/MathML">
            <ci> FLUX_VALUE </ci>
          </math>
          <listOfParameters>
            <parameter id="LOWER_BOUND" value="0" units="mmol_per_gDW_per_hr"/>
            <parameter id="UPPER_BOUND" value="1000" units="mmol_per_gDW_per_hr"/>
            <parameter id="OBJECTIVE_COEFFICIENT" value="0"/>
            <parameter id="FLUX_VALUE" value="5" units="mmol_per_gDW_per_hr"/>
          </listOfParameters>
        </kineticLaw>
      </reaction>
      <reaction id="R_CS" name="citrate synthase" reversible="false">
        <notes>
          <html xmlns="http://www.w3.org/1999/xhtml"><p>GENE_ASSOCIATION: ( Rv0889c  or  Rv0896  or  Rv1131 )</p><p>GENE_LIST: Rv0889c Rv0896 Rv1131</p><p>SUBSYSTEM: Citric Acid Cycle</p></html>
        </notes>
        <listOfReactants>
          <speciesReference species="M_accoa_c"/>
          <speciesReference species="M_h2o_c"/>
          <speciesReference species="M_oaa_c"/>
        </listOfReactants>
        <listOfProducts>
          <speciesReference species="M_cit_c"/>
          <speciesReference species="M_coa_c"/>
          <speciesReference species="M_h_c"/>
        </listOfProducts>
        <kineticLaw>
          <math xmlns="http://www.w3.org/1998/Math/MathML">
            <ci> FLUX_VALUE </ci>
          </math>
          <listOfParameters>
            <parameter id="LOWER_BOUND" value="0" units="mmol_per_gDW_per_hr"/>
            <parameter id="UPPER_BOUND" value="1000" units="mmol_per_gDW_per_hr"/>
            <parameter id="OBJECTIVE_COEFFICIENT" value="0"/>
            <parameter id="FLUX_VALUE" value="5" units="mmol_per_gDW_per_hr"/>
          </listOfParameters>
        </kineticLaw>
      </reaction>
      <reaction id="R_CTPS1" name="CTP synthase NH3 " reversible="false">
        <notes>
          <html xmlns="http://www.w3.org/1999/xhtml"><p>GENE_ASSOCIATION: Rv1699</p><p>GENE_LIST: Rv1699</p><p>SUBSYSTEM: Pyrimidine Metabolism</p></html>
        </notes>
        <listOfReactants>
          <speciesReference species="M_atp_c"/>
          <speciesReference species="M_nh4_c"/>
          <speciesReference species="M_utp_c"/>
        </listOfReactants>
        <listOfProducts>
          <speciesReference species="M_adp_c"/>
          <speciesReference species="M_ctp_c"/>
          <speciesReference species="M_h_c" stoichiometry="2"/>
          <speciesReference species="M_pi_c"/>
        </listOfProducts>
        <kineticLaw>
          <math xmlns="http://www.w3.org/1998/Math/MathML">
            <ci> FLUX_VALUE </ci>
          </math>
          <listOfParameters>
            <parameter id="LOWER_BOUND" value="0" units="mmol_per_gDW_per_hr"/>
            <parameter id="UPPER_BOUND" value="1000" units="mmol_per_gDW_per_hr"/>
            <parameter id="OBJECTIVE_COEFFICIENT" value="0"/>
            <parameter id="FLUX_VALUE" value="5" units="mmol_per_gDW_per_hr"/>
          </listOfParameters>
        </kineticLaw>
      </reaction>
      <reaction id="R_CTPS2" name="CTP synthase glutamine " reversible="false">
        <notes>
          <html xmlns="http://www.w3.org/1999/xhtml"><p>GENE_ASSOCIATION: Rv1699</p><p>GENE_LIST: Rv1699</p><p>SUBSYSTEM: Pyrimidine Metabolism</p></html>
        </notes>
        <listOfReactants>
          <speciesReference species="M_atp_c"/>
          <speciesReference species="M_gln_L_c"/>
          <speciesReference species="M_h2o_c"/>
          <speciesReference species="M_utp_c"/>
        </listOfReactants>
        <listOfProducts>
          <speciesReference species="M_adp_c"/>
          <speciesReference species="M_ctp_c"/>
          <speciesReference species="M_glu_L_c"/>
          <speciesReference species="M_h_c" stoichiometry="2"/>
          <speciesReference species="M_pi_c"/>
        </listOfProducts>
        <kineticLaw>
          <math xmlns="http://www.w3.org/1998/Math/MathML">
            <ci> FLUX_VALUE </ci>
          </math>
          <listOfParameters>
            <parameter id="LOWER_BOUND" value="0" units="mmol_per_gDW_per_hr"/>
            <parameter id="UPPER_BOUND" value="1000" units="mmol_per_gDW_per_hr"/>
            <parameter id="OBJECTIVE_COEFFICIENT" value="0"/>
            <parameter id="FLUX_VALUE" value="5" units="mmol_per_gDW_per_hr"/>
          </listOfParameters>
        </kineticLaw>
      </reaction>
      <reaction id="R_CYANST" name="Cyanide sulfurtransferase" reversible="false">
        <notes>
          <html xmlns="http://www.w3.org/1999/xhtml"><p>GENE_ASSOCIATION: Rv3283</p><p>GENE_LIST: Rv3283</p><p>SUBSYSTEM: Redox Metabolism</p></html>
        </notes>
        <listOfReactants>
          <speciesReference species="M_cyan_c"/>
          <speciesReference species="M_tsul_c"/>
        </listOfReactants>
        <listOfProducts>
          <speciesReference species="M_h_c"/>
          <speciesReference species="M_so3_c"/>
          <speciesReference species="M_tcynt_c"/>
        </listOfProducts>
        <kineticLaw>
          <math xmlns="http://www.w3.org/1998/Math/MathML">
            <ci> FLUX_VALUE </ci>
          </math>
          <listOfParameters>
            <parameter id="LOWER_BOUND" value="0" units="mmol_per_gDW_per_hr"/>
            <parameter id="UPPER_BOUND" value="1000" units="mmol_per_gDW_per_hr"/>
            <parameter id="OBJECTIVE_COEFFICIENT" value="0"/>
            <parameter id="FLUX_VALUE" value="5" units="mmol_per_gDW_per_hr"/>
          </listOfParameters>
        </kineticLaw>
      </reaction>
      <reaction id="R_CYO1a" name="cytochrome c reductase ubiquinol 2 protons " reversible="false">
        <notes>
          <html xmlns="http://www.w3.org/1999/xhtml"><p>GENE_ASSOCIATION: ( Rv2194  and  Rv2195  and  Rv2196 )</p><p>GENE_LIST: Rv2194 Rv2195 Rv2196</p><p>SUBSYSTEM: Redox Metabolism</p></html>
        </notes>
        <listOfReactants>
          <speciesReference species="M_ficytc_c" stoichiometry="2"/>
          <speciesReference species="M_h_c" stoichiometry="2"/>
          <speciesReference species="M_qh2_c"/>
        </listOfReactants>
        <listOfProducts>
          <speciesReference species="M_focytc_c" stoichiometry="2"/>
          <speciesReference species="M_h_e" stoichiometry="2"/>
          <speciesReference species="M_q_c"/>
        </listOfProducts>
        <kineticLaw>
          <math xmlns="http://www.w3.org/1998/Math/MathML">
            <ci> FLUX_VALUE </ci>
          </math>
          <listOfParameters>
            <parameter id="LOWER_BOUND" value="0" units="mmol_per_gDW_per_hr"/>
            <parameter id="UPPER_BOUND" value="1000" units="mmol_per_gDW_per_hr"/>
            <parameter id="OBJECTIVE_COEFFICIENT" value="0"/>
            <parameter id="FLUX_VALUE" value="5" units="mmol_per_gDW_per_hr"/>
          </listOfParameters>
        </kineticLaw>
      </reaction>
      <reaction id="R_CYO1b" name="cytochrome c oxidase 2 protons " reversible="false">
        <notes>
          <html xmlns="http://www.w3.org/1999/xhtml"><p>GENE_ASSOCIATION: ( Rv1451  and  Rv2193  and  Rv2200c  and  Rv3043c )</p><p>GENE_LIST: Rv1451 Rv2193 Rv2200c Rv3043c</p><p>SUBSYSTEM: Purine Metabolism</p></html>
        </notes>
        <listOfReactants>
          <speciesReference species="M_focytc_c" stoichiometry="2"/>
          <speciesReference species="M_o2_c" stoichiometry="0.5"/>
        </listOfReactants>
        <listOfProducts>
          <speciesReference species="M_ficytc_c" stoichiometry="2"/>
          <speciesReference species="M_h2o_c"/>
        </listOfProducts>
        <kineticLaw>
          <math xmlns="http://www.w3.org/1998/Math/MathML">
            <ci> FLUX_VALUE </ci>
          </math>
          <listOfParameters>
            <parameter id="LOWER_BOUND" value="0" units="mmol_per_gDW_per_hr"/>
            <parameter id="UPPER_BOUND" value="1000" units="mmol_per_gDW_per_hr"/>
            <parameter id="OBJECTIVE_COEFFICIENT" value="0"/>
            <parameter id="FLUX_VALUE" value="5" units="mmol_per_gDW_per_hr"/>
          </listOfParameters>
        </kineticLaw>
      </reaction>
      <reaction id="R_CYRDAAT" name="cob I yrinic acid a c diamide adenosyltransferase" reversible="false">
        <notes>
          <html xmlns="http://www.w3.org/1999/xhtml"><p>GENE_ASSOCIATION: Rv2849c</p><p>GENE_LIST: Rv2849c</p><p>SUBSYSTEM: Cofactor Metabolism</p></html>
        </notes>
        <listOfReactants>
          <speciesReference species="M_atp_c"/>
          <speciesReference species="M_co1dam_c"/>
          <speciesReference species="M_h_c"/>
        </listOfReactants>
        <listOfProducts>
          <speciesReference species="M_adcobdam_c"/>
          <speciesReference species="M_pppi_c"/>
        </listOfProducts>
        <kineticLaw>
          <math xmlns="http://www.w3.org/1998/Math/MathML">
            <ci> FLUX_VALUE </ci>
          </math>
          <listOfParameters>
            <parameter id="LOWER_BOUND" value="0" units="mmol_per_gDW_per_hr"/>
            <parameter id="UPPER_BOUND" value="1000" units="mmol_per_gDW_per_hr"/>
            <parameter id="OBJECTIVE_COEFFICIENT" value="0"/>
            <parameter id="FLUX_VALUE" value="5" units="mmol_per_gDW_per_hr"/>
          </listOfParameters>
        </kineticLaw>
      </reaction>
      <reaction id="R_CYRDAR" name="cob II yrinic acid a c diamide reductase" reversible="false">
        <notes>
          <html xmlns="http://www.w3.org/1999/xhtml"><p>GENE_ASSOCIATION: Rv0306</p><p>GENE_LIST: Rv0306</p><p>SUBSYSTEM: Cofactor Metabolism</p></html>
        </notes>
        <listOfReactants>
          <speciesReference species="M_co2dam_c" stoichiometry="2"/>
          <speciesReference species="M_nadh_c"/>
        </listOfReactants>
        <listOfProducts>
          <speciesReference species="M_co1dam_c" stoichiometry="2"/>
          <speciesReference species="M_h_c"/>
          <speciesReference species="M_nad_c"/>
        </listOfProducts>
        <kineticLaw>
          <math xmlns="http://www.w3.org/1998/Math/MathML">
            <ci> FLUX_VALUE </ci>
          </math>
          <listOfParameters>
            <parameter id="LOWER_BOUND" value="0" units="mmol_per_gDW_per_hr"/>
            <parameter id="UPPER_BOUND" value="1000" units="mmol_per_gDW_per_hr"/>
            <parameter id="OBJECTIVE_COEFFICIENT" value="0"/>
            <parameter id="FLUX_VALUE" value="5" units="mmol_per_gDW_per_hr"/>
          </listOfParameters>
        </kineticLaw>
      </reaction>
      <reaction id="R_CYSS" name="cysteine synthase" reversible="false">
        <notes>
          <html xmlns="http://www.w3.org/1999/xhtml"><p>GENE_ASSOCIATION: ( Rv0848  or  Rv1336  or  Rv2334 )</p><p>GENE_LIST: Rv0848 Rv1336 Rv2334</p><p>SUBSYSTEM: Cysteine Metabolism</p></html>
        </notes>
        <listOfReactants>
          <speciesReference species="M_acser_c"/>
          <speciesReference species="M_h2s_c"/>
        </listOfReactants>
        <listOfProducts>
          <speciesReference species="M_ac_c"/>
          <speciesReference species="M_cys_L_c"/>
          <speciesReference species="M_h_c"/>
        </listOfProducts>
        <kineticLaw>
          <math xmlns="http://www.w3.org/1998/Math/MathML">
            <ci> FLUX_VALUE </ci>
          </math>
          <listOfParameters>
            <parameter id="LOWER_BOUND" value="0" units="mmol_per_gDW_per_hr"/>
            <parameter id="UPPER_BOUND" value="1000" units="mmol_per_gDW_per_hr"/>
            <parameter id="OBJECTIVE_COEFFICIENT" value="0"/>
            <parameter id="FLUX_VALUE" value="5" units="mmol_per_gDW_per_hr"/>
          </listOfParameters>
        </kineticLaw>
      </reaction>
      <reaction id="R_CYSTGL" name="cystathionine g lyase" reversible="false">
        <notes>
          <html xmlns="http://www.w3.org/1999/xhtml"><p>SUBSYSTEM: Methionine Metabolism</p></html>
        </notes>
        <listOfReactants>
          <speciesReference species="M_cyst_L_c"/>
          <speciesReference species="M_h2o_c"/>
        </listOfReactants>
        <listOfProducts>
          <speciesReference species="M_2obut_c"/>
          <speciesReference species="M_cys_L_c"/>
          <speciesReference species="M_nh4_c"/>
        </listOfProducts>
        <kineticLaw>
          <math xmlns="http://www.w3.org/1998/Math/MathML">
            <ci> FLUX_VALUE </ci>
          </math>
          <listOfParameters>
            <parameter id="LOWER_BOUND" value="0" units="mmol_per_gDW_per_hr"/>
            <parameter id="UPPER_BOUND" value="1000" units="mmol_per_gDW_per_hr"/>
            <parameter id="OBJECTIVE_COEFFICIENT" value="0"/>
            <parameter id="FLUX_VALUE" value="5" units="mmol_per_gDW_per_hr"/>
          </listOfParameters>
        </kineticLaw>
      </reaction>
      <reaction id="R_CYSTL" name="cystathionine b lyase" reversible="false">
        <notes>
          <html xmlns="http://www.w3.org/1999/xhtml"><p>GENE_ASSOCIATION: Rv3340</p><p>GENE_LIST: Rv3340</p><p>SUBSYSTEM: Methionine Metabolism</p></html>
        </notes>
        <listOfReactants>
          <speciesReference species="M_cyst_L_c"/>
          <speciesReference species="M_h2o_c"/>
        </listOfReactants>
        <listOfProducts>
          <speciesReference species="M_hcys_L_c"/>
          <speciesReference species="M_nh4_c"/>
          <speciesReference species="M_pyr_c"/>
        </listOfProducts>
        <kineticLaw>
          <math xmlns="http://www.w3.org/1998/Math/MathML">
            <ci> FLUX_VALUE </ci>
          </math>
          <listOfParameters>
            <parameter id="LOWER_BOUND" value="0" units="mmol_per_gDW_per_hr"/>
            <parameter id="UPPER_BOUND" value="1000" units="mmol_per_gDW_per_hr"/>
            <parameter id="OBJECTIVE_COEFFICIENT" value="0"/>
            <parameter id="FLUX_VALUE" value="5" units="mmol_per_gDW_per_hr"/>
          </listOfParameters>
        </kineticLaw>
      </reaction>
      <reaction id="R_CYSTS" name="cystathionine beta synthase" reversible="false">
        <notes>
          <html xmlns="http://www.w3.org/1999/xhtml"><p>GENE_ASSOCIATION: Rv1077</p><p>GENE_LIST: Rv1077</p><p>SUBSYSTEM: Methionine Metabolism</p></html>
        </notes>
        <listOfReactants>
          <speciesReference species="M_hcys_L_c"/>
          <speciesReference species="M_ser_L_c"/>
        </listOfReactants>
        <listOfProducts>
          <speciesReference species="M_cyst_L_c"/>
          <speciesReference species="M_h2o_c"/>
        </listOfProducts>
        <kineticLaw>
          <math xmlns="http://www.w3.org/1998/Math/MathML">
            <ci> FLUX_VALUE </ci>
          </math>
          <listOfParameters>
            <parameter id="LOWER_BOUND" value="0" units="mmol_per_gDW_per_hr"/>
            <parameter id="UPPER_BOUND" value="1000" units="mmol_per_gDW_per_hr"/>
            <parameter id="OBJECTIVE_COEFFICIENT" value="0"/>
            <parameter id="FLUX_VALUE" value="5" units="mmol_per_gDW_per_hr"/>
          </listOfParameters>
        </kineticLaw>
      </reaction>
      <reaction id="R_CYTBD" name="cytochrome oxidase bd ubiquinol 8 2 protons " reversible="false">
        <notes>
          <html xmlns="http://www.w3.org/1999/xhtml"><p>GENE_ASSOCIATION: ( Rv1620c  and  Rv1621c  and  Rv1622c  and  Rv1623c )</p><p>GENE_LIST: Rv1620c Rv1621c Rv1622c Rv1623c</p><p>SUBSYSTEM: Redox Metabolism</p></html>
        </notes>
        <listOfReactants>
          <speciesReference species="M_h_c" stoichiometry="2"/>
          <speciesReference species="M_o2_c" stoichiometry="0.5"/>
          <speciesReference species="M_q8h2_c"/>
        </listOfReactants>
        <listOfProducts>
          <speciesReference species="M_h2o_c"/>
          <speciesReference species="M_h_e" stoichiometry="2"/>
          <speciesReference species="M_q8_c"/>
        </listOfProducts>
        <kineticLaw>
          <math xmlns="http://www.w3.org/1998/Math/MathML">
            <ci> FLUX_VALUE </ci>
          </math>
          <listOfParameters>
            <parameter id="LOWER_BOUND" value="0" units="mmol_per_gDW_per_hr"/>
            <parameter id="UPPER_BOUND" value="1000" units="mmol_per_gDW_per_hr"/>
            <parameter id="OBJECTIVE_COEFFICIENT" value="0"/>
            <parameter id="FLUX_VALUE" value="5" units="mmol_per_gDW_per_hr"/>
          </listOfParameters>
        </kineticLaw>
      </reaction>
      <reaction id="R_CYTBD2" name="cytochrome oxidase bd menaquinol 8 2 protons " reversible="false">
        <notes>
          <html xmlns="http://www.w3.org/1999/xhtml"><p>GENE_ASSOCIATION: ( Rv1620c  and  Rv1621c  and  Rv1622c  and  Rv1623c )</p><p>GENE_LIST: Rv1620c Rv1621c Rv1622c Rv1623c</p><p>SUBSYSTEM: Redox Metabolism</p></html>
        </notes>
        <listOfReactants>
          <speciesReference species="M_h_c" stoichiometry="2"/>
          <speciesReference species="M_mql8_c"/>
          <speciesReference species="M_o2_c" stoichiometry="0.5"/>
        </listOfReactants>
        <listOfProducts>
          <speciesReference species="M_h2o_c"/>
          <speciesReference species="M_h_e" stoichiometry="2"/>
          <speciesReference species="M_mqn8_c"/>
        </listOfProducts>
        <kineticLaw>
          <math xmlns="http://www.w3.org/1998/Math/MathML">
            <ci> FLUX_VALUE </ci>
          </math>
          <listOfParameters>
            <parameter id="LOWER_BOUND" value="0" units="mmol_per_gDW_per_hr"/>
            <parameter id="UPPER_BOUND" value="1000" units="mmol_per_gDW_per_hr"/>
            <parameter id="OBJECTIVE_COEFFICIENT" value="0"/>
            <parameter id="FLUX_VALUE" value="5" units="mmol_per_gDW_per_hr"/>
          </listOfParameters>
        </kineticLaw>
      </reaction>
      <reaction id="R_CYTD" name="cytidine deaminase" reversible="false">
        <notes>
          <html xmlns="http://www.w3.org/1999/xhtml"><p>GENE_ASSOCIATION: Rv3315c</p><p>GENE_LIST: Rv3315c</p><p>SUBSYSTEM: Pyrimidine Metabolism</p></html>
        </notes>
        <listOfReactants>
          <speciesReference species="M_cytd_c"/>
          <speciesReference species="M_h2o_c"/>
          <speciesReference species="M_h_c"/>
        </listOfReactants>
        <listOfProducts>
          <speciesReference species="M_nh4_c"/>
          <speciesReference species="M_uri_c"/>
        </listOfProducts>
        <kineticLaw>
          <math xmlns="http://www.w3.org/1998/Math/MathML">
            <ci> FLUX_VALUE </ci>
          </math>
          <listOfParameters>
            <parameter id="LOWER_BOUND" value="0" units="mmol_per_gDW_per_hr"/>
            <parameter id="UPPER_BOUND" value="1000" units="mmol_per_gDW_per_hr"/>
            <parameter id="OBJECTIVE_COEFFICIENT" value="0"/>
            <parameter id="FLUX_VALUE" value="5" units="mmol_per_gDW_per_hr"/>
          </listOfParameters>
        </kineticLaw>
      </reaction>
      <reaction id="R_CYTDK2" name="cytidine kinase GTP " reversible="false">
        <notes>
          <html xmlns="http://www.w3.org/1999/xhtml"><p>SUBSYSTEM: Nucleotide Sugar Metabolism</p></html>
        </notes>
        <listOfReactants>
          <speciesReference species="M_cytd_c"/>
          <speciesReference species="M_gtp_c"/>
        </listOfReactants>
        <listOfProducts>
          <speciesReference species="M_cmp_c"/>
          <speciesReference species="M_gdp_c"/>
          <speciesReference species="M_h_c"/>
        </listOfProducts>
        <kineticLaw>
          <math xmlns="http://www.w3.org/1998/Math/MathML">
            <ci> FLUX_VALUE </ci>
          </math>
          <listOfParameters>
            <parameter id="LOWER_BOUND" value="0" units="mmol_per_gDW_per_hr"/>
            <parameter id="UPPER_BOUND" value="1000" units="mmol_per_gDW_per_hr"/>
            <parameter id="OBJECTIVE_COEFFICIENT" value="0"/>
            <parameter id="FLUX_VALUE" value="5" units="mmol_per_gDW_per_hr"/>
          </listOfParameters>
        </kineticLaw>
      </reaction>
      <reaction id="R_CYTDt2r" name="cytidine transport in via proton symport reversible">
        <notes>
          <html xmlns="http://www.w3.org/1999/xhtml"><p>SUBSYSTEM: Transport</p></html>
        </notes>
        <listOfReactants>
          <speciesReference species="M_cytd_e"/>
          <speciesReference species="M_h_e"/>
        </listOfReactants>
        <listOfProducts>
          <speciesReference species="M_cytd_c"/>
          <speciesReference species="M_h_c"/>
        </listOfProducts>
        <kineticLaw>
          <math xmlns="http://www.w3.org/1998/Math/MathML">
            <ci> FLUX_VALUE </ci>
          </math>
          <listOfParameters>
            <parameter id="LOWER_BOUND" value="-1000" units="mmol_per_gDW_per_hr"/>
            <parameter id="UPPER_BOUND" value="1000" units="mmol_per_gDW_per_hr"/>
            <parameter id="OBJECTIVE_COEFFICIENT" value="0"/>
            <parameter id="FLUX_VALUE" value="0" units="mmol_per_gDW_per_hr"/>
          </listOfParameters>
        </kineticLaw>
      </reaction>
      <reaction id="R_CYTK1" name="cytidylate kinase CMP ">
        <notes>
[truncated: 992,442 more chars]
