# Supplementary material for: Modeling Phenotypic Metabolic Adaptations of Mycobacterium tuberculosis H37Rv under Hypoxia
Source: PLoS Comput Biol. 2012 Sep 13;8(9):e1002688. doi: 10.1371/journal.pcbi.1002688 (PMC3441462; doi:10.1371/journal.pcbi.1002688)
Supplement: Protocol S1 — MATLAB-formatted models of metabolism for M. tuberculosis HR37v and its Δ dosR deletion mutant. (ZIP) [file pcbi.1002688.s001.zip › lpxf_b1.m]

% deal with equal lower and upper bounds
% here we used the codes for the GLPK interface
% 

function [xopt,fmin,status,extra] = lpxf_b1 (c,a,b,lb,ub,ctype,vartype,sense,param)

% If there is no input output the version and syntax
if (nargin < 3 || nargin > 9)
    disp('GLPK Matlab interface. Version: 2.0');
    disp('(C) 2001-2007, Nicolo'' Giorgetti.');
    disp(' ');
    disp('Syntax: [xopt,fopt,status,extra]=glpk(c,a,b,lb,ub,ctype,vartype,sense,param)');
    return;
end

if (all(size(c) > 1) || ~isreal(c) || ischar(c))
    error('C must be a real vector');
end
nx = length (c);
% Force column vector.
c = c(:);

% 2) Matrix constraint
if (isempty(a))
    error('A cannot be an empty matrix');
end
[nc, nxa] = size(a);
if (~isreal(a) || nxa ~= nx)
    tmp=sprintf('A must be a real valued %d by %d matrix', nc, nx);
    error(tmp);
    return;
end

% 3) RHS
if (isempty(b))
    error('B cannot be an empty vector');
end
if (~isreal(b) || length(b) ~= nc)
    tmp=sprintf('B must be a real valued %d by 1 vector', nc);
    error (tmp);
    return;
end

% 4) Vector with the lower bound of each variable
if (nargin > 3)
    if (isempty(lb))
        lb = repmat(-Inf, nx, 1);
    elseif (~isreal(lb) || all(size(lb) > 1) || length(lb) ~= nx)
        tmp=sprintf('LB must be a real valued %d by 1 column vector', nx);
        error (tmp);
        return;
    end
else
    lb = -Inf*ones(nx, 1);
end

% 5) Vector with the upper bound of each variable
if (nargin > 4)
    if (isempty(ub))
        ub = repmat(Inf, nx, 1);
    elseif (~isreal(ub) || all(size(ub) > 1) || length(ub) ~= nx)
        tmp=sprintf('UB must be a real valued %d by 1 column vector', nx);
        error (tmp);
        return;
    end
else
    ub = repmat(Inf, nx, 1);
end

% 6) Sense of each constraint
if (nargin > 5)
    if (isempty (ctype))
        ctype = repmat('U', nc, 1);
    elseif (~ischar(ctype) || all(size(ctype) > 1) || length(ctype) ~= nc)
        tmp=sprintf('CTYPE must be a char valued vector of length %d', nc);
        error(tmp);
        return;
    else
       for i=1:length(ctype)
          switch(ctype(i))
             case {'f','F'}, % do nothing
             case {'u','U'}, % do nothing
             case {'s','S'}, % do nothing
             case {'l','L'}, % do nothing
             case {'d','D'}, % do nothing
             otherwise
                tmp=sprintf('CTYPE must contain only F, U, S, L, or D');
                error(tmp);
          end
       end
    end
else
    ctype= repmat('U', nc, 1);
end

% 7) Vector with the type of variables
if (nargin > 6)
    if isempty(vartype)
        vartype = repmat('C', nx, 1);
    elseif (~ischar(vartype) || all(size(vartype) > 1) || length (vartype) ~= nx)
        tmp=sprintf('VARTYPE must be a char valued vector of length %d', nx);
        error(tmp);
        return;
    else
       for i=1:length(vartype)
          switch(vartype(i))
             case {'c','C'}, % do nothing
             case {'i','I'}, % do nothing
             case {'b','B'}, % do nothing
             otherwise
                tmp=sprintf('VARTYPE must contain only C, I or B');
                error(tmp);
          end
       end
    end
else
    % As default we consider continuous vars
    vartype = repmat('C', nx, 1);
end

% 8) Sense of optimization
if (nargin >7)
    if isempty(sense)
        sense=1;
    elseif (ischar(sense) || all(size(sense) > 1) || ~isreal(sense))
        tmp=sprintf('SENSE must be an integer value');
        error(tmp);
    elseif sense>=0
        sense=1;
    else
        sense=-1;
    end
else
    sense=1;
end

% 9) Parameters vector
if (nargin > 8)
    if (~isstruct(param))
        error('PARAM must be a structure');
    end
else
   if str2double(version('-release'))<14
      param =struct;
   else
      param = struct([]);
   end
end


%%%%% Above are the codes from glpk.m from GLPK toolbox
%%%%% Below are the codes written by the authors of the manuscripts

tolbnd = 1e-7;

% change the constraints due to that lower bounds are equal to upper bounds
lbub = abs(ub-lb);
indlbEub = find(lbub < tolbnd);
indlbNub = lbub >= tolbnd;
xlbub = (ub(indlbEub)+lb(indlbEub))/2;
c1 = c(indlbNub);
a1 = a(:,indlbNub);
b1 = b-a(:,indlbEub)*xlbub;
lb1 = lb(indlbNub);
ub1 = ub(indlbNub);
vartype1 = vartype(indlbNub);

% glpk
[xopt1, fmin, status, extra] = glpkcc(c1, a1, b1, lb1, ub1, ctype, vartype1, sense, param);


xopt = zeros(length(lb),1);
if status==5
    xopt(indlbEub) = xlbub;
    xopt(indlbNub) = xopt1;
end;
