# Supplementary material for: Modeling Phenotypic Metabolic Adaptations of Mycobacterium tuberculosis H37Rv under Hypoxia
Source: PLoS Comput Biol. 2012 Sep 13;8(9):e1002688. doi: 10.1371/journal.pcbi.1002688 (PMC3441462; doi:10.1371/journal.pcbi.1002688)
Supplement: Protocol S1 — MATLAB-formatted models of metabolism for M. tuberculosis HR37v and its Δ dosR deletion mutant. (ZIP) [file pcbi.1002688.s001.zip › read_ref_fluxes.m]

v_ref1  = [     7.23E-12
9.33E-12
-5.27E-06
0
0
0.34449
0.041656
0.40324
2.64E-06
42.88
0.015292
-3.33E-11
0
0.20367
34.16
0.20367
-7.55E-12
0.0038545
0.99887
7.33E-12
0.4626
-42.88
2.1647
7.33E-12
86.06
-0.99887
7.85E-12
0
1.83E-11
1.86E-11
0
6.71E-12
1.05E-05
0
0
1.05E-05
0
-4.7909
4.7909
136.41
-128.12
0
9.33E-12
0.16342
-5.36E-11
0.16342
0
0
0.11454
0.34012
0.96567
2.0714
0.96567
0.0038545
0.0038545
7.55E-12
0
0.093795
0.21565
0.06442
-0.99887
0.44138
0
5.27E-06
1.1428
1.1428
7.85E-12
-7.85E-12
2.0714
0
8.00E-12
0.21977
0
0.43954
-2.7999
0
1.10E-10
0
-4.61E-12
-1.96E-11
0
0
0
5.27E-06
-2.42E-13
2.87E-12
0.10611
0.10611
0
-9.69E-11
1.05E-05
0.0038545
-0.12334
0.0014395
0
0
9.07E-12
-9.07E-12
0
-0.63495
1.92E-11
1.92E-11
1.35E-11
-0.1484
-1.826
2.69E-12
0.25151
1.79E-11
5.27E-06
2.0863
1.826
8.22E-11
1.58E-05
-7.8353
1.42E-10
-1.10E-11
0.21417
1.66E-11
55.781
0
5.74E-11
-0.015292
0
0
0
0.34012
0
0
2.90E-11
-2.93E-11
-5.80E-11
0
0
2.7213
4.00E-12
4.00E-12
3.92E-12
0.2734
-8.63E-12
0.085691
0
0
0.42109
0.58417
0.041656
0
-86.06
0
0.030894
0.0079042
5.27E-06
0
0
3.65E-13
0
0
-37.563
-6.24E-11
37.563
0
0
0
0
0
0
5.27E-06
0
7.40E-12
1.3584
6.79E-12
0
97.835
97.835
0
0
0.29998
0.5928
0.18397
3.05E-11
2.0863
95.749
-1.72E-11
1.84E-11
9.30E-14
-0.7838
-0.035134
0
4.00E-12
4.00E-12
6.71E-12
-0.018413
-2.62E-11
-5.87E-11
1.10E-10
0.44612
0.45647
0.055619
0.1798
0.030636
2.11E-05
0
1.05E-05
0.1484
0.1484
0.012431
0.1484
0.14841
0.1484
7.77E-12
7.77E-12
-1.27E-11
0.58417
0.028843
0.029663
0
-0.035113
2.1647
0.4626
0.45647
0.45647
0.019267
1.05E-05
5.27E-06
0
-1.99E-09
1.05E-05
2.0863
0
0
-2.0863
5.27E-06
5.27E-06
1.05E-05
0.58417
0.58417
0.024857
0.1367
1.05E-05
1.05E-05
-6.64E-14
0.01242
5.27E-06
0
0
4.00E-12
-2.44E-11
0
4.00E-12
0.2734
0.2734
0
37.563
276.47
0
-3.04E-12
5.27E-06
0
-5.74E-11
-1.10E-10
-1.10E-10
0
0
-1.35E-11
-1.79E-11
-1.42E-10
0
0
0
0
0
0
0
37.563
-3.65E-13
0
0
0
-9.30E-14
3.04E-12
0
-0.0079041
3.91E-11
0
1.58E-05
-100
83.696
-6.09E-11
0
0
-100
0
88.129
37.563
338.93
1.41E-13
299.96
0
2.01E-12
-1.42E-12
-3.91E-11
-5.27E-06
-2.69E-10
0
-3.49E-11
-1.45E-12
2.69E-11
0
0
0
0
0
-5.27E-06
-118.16
0
0
0
-98
0
-4.05E-11
-4.61E-12
-3.43E-13
-1.50E-12
-8.05E-12
-5.844
0
1.17E-13
-1.09E-10
-8.39E-11
0
0
-5.37E-11
3.98E-12
-0.34012
48.043
0
-1.37E-11
0
-1.60E-12
0
0
-3.09E-12
-1.14E-10
0
9.33E-12
9.33E-12
9.33E-12
9.33E-12
0.072413
-0.028843
0.029663
-0.02227
0.0014395
0.0078989
-0.034026
-0.0014395
0
0.10449
0.017453
0.023422
0.02936
0.028938
-2.02E-12
-4.84E-12
-4.16E-12
-7.44E-13
-4.53E-12
2.9921
2.9921
2.9921
2.899
0.028843
1.1293
0.029663
0.14358
0.71502
0.71502
3.8497
0.041656
0.012196
0.84965
0.012196
0.012196
0.050778
0.059479
0.012196
0.050778
0.018139
0.012196
0.050778
0.018139
0.012196
0.024393
0.018139
0.012196
0.024393
0.024393
0
0.024393
0.024393
92.184
0
0
2.64E-06
2.64E-06
9.33E-12
-3.39E-11
0
2.64E-06
-1.07E-09
-2.64E-06
125.69
0
3.31E-14
-1.99E-09
0
-7.85E-12
1.65E-10
-2.27E-10
24.692
0
0
6.28E-11
1.08E-10
0
0.0062432
7.85E-12
6.95E-12
0.016702
-46.347
-3.91E-11
0.085691
0.006085
0.013994
0.013425
0.0063855
0.051886
0.028453
0.020158
0.012761
1.6719
0.016341
8.44E-05
0.30944
0.06442
99.364
0.72785
2.22E-10
0.36392
-2.88E-11
0.0038545
-0.29251
-0.29251
0.60704
0
281.51
2.0714
-1.58E-05
0
-1.47E-10
-1.47E-10
-1.47E-10
1.6719
0.0062432
2.87E-12
3.8421
0.035134
7.85E-12
7.85E-12
100
7.85E-12
10.734
0
0
0
0.36392
2.87E-12
2.64E-06
-106.08
2.0714
-0.21977
-6.29E-12
8.44E-05
8.44E-05
-83.696
-1.55E-10
0
0
0
-1.46E-10
0
0
0
0
-100
99.897
6.09E-11
0.0062432
1.3199
0.01981
0.030836
-2.88E-11
3.04E-12
0.024857
7.85E-12
0
0
2.87E-12
2.87E-12
1.05E-05
5.27E-06
5.27E-06
0
3.01E-12
3.09E-12
1.35E-11
-1.22E-11
37.563
-37.563
-338.93
1.41E-13
88.129
0.030836
36.881
1.32E-11
0
7.83E-12
0.21417
0.21417
-2.01E-12
1.05E-05
-5.69E-18
2.64E-06
2.64E-06
0
0
-1.99E-09
1.05E-05
-0.68478
-0.68478
0
0.68478
0.68478
0.21417
-1.22E-11
0
86.06
5.27E-06
-1.20E-10
-1.42E-12
0.21417
0
0.21417
0.10611
-0.4626
3.91E-11
-2.2856
1.3199
-1.42E-12
0.11454
-2.44E-11
-0.11184
0.1367
1.0794
-1.0794
-1.0794
1.0794
2.1647
0.4626
-2.04E-11
-5.27E-06
0
0
-120.44
-1.0794
3.49E-11
-2.38E-11
3.04E-12
0
1.45E-12
4.96E-11
0
120.44
2.85E-10
1.51E-11
-1.20E-10
7.05E-13
0
0
-2.69E-11
1.85E-11
0.33759
-0.83886
0.022858
0.013994
0.0067177
0.0073927
0
0.0078989
7.70E-12
3.1271
0
-113.76
67.413
0.2734
0.2734
0
0.2734
0.44138
-1.94E-11
-1.94E-11
0.62535
-1.94E-11
-1.94E-11
0
0
0
0.085691
0.085691
0
0
0
1.3414
1.3414
0
0
-9.69E-11
0.50127
0
0
5.27E-06
0
0
0
0
0
0
0
3.1975
1.5987
1.5987
0.62535
7.05E-13
0.10449
0.017453
0.023422
0.02936
0.028938
0.02936
0.028938
0.10449
0.017453
0.023422
0
0
0
0
0
0.10449
0.017453
0.023422
0.02936
0.028938
0.10449
0.046813
0.05236
0
0
0
97.835
0
0
5.27E-06
1.05E-05
5.12
4.13E-19
0
0
-5.27E-06
-0.16342
2.1407
-0.81892
0.016341
0.16342
-0.009631
7.77E-12
4.00E-12
-128.12
0
118.16
0
1.05E-05
0
1.05E-05
0
0
0
0
0
5.27E-06
-2.44E-11
-1.22E-11
-1.22E-11
2.40E-11
-1.27E-11
1.84E-11
7.85E-12
0
-5.86E-11
1.39E-28
7.85E-12
3.09E-12
4.00E-12
4.00E-12
4.00E-12
4.00E-12
4.45E-12
0
-1.73E-11
0
0
0
0.0038545
98
0.63495
0
-42.895
5.27E-06
0
1.0794
2.0863
2.87E-12
0.36392
0.99887
4.05E-11
-2.0863
-1.55E-10
-1.55E-10
0
2.64E-06
7.12E-12
19.936
5.484
4.61E-12
5.27E-06
-2.62E-11
0.10471
0.10471
0.0051991
0.29998
0.0065965
8.06E-12
0
0
0
0
0
0
9.33E-12
3.09E-12
-3.35E-11
-3.37E-11
-3.37E-11
3.39E-10
1.73E-10
0.0014395
-3.43E-13
0
-4.61E-12
-137.53
0
92.184
126.85
-1.6719
5.0336
98.232
-281.51
-2.88E-11
0.0062432
0
-276.47
-0.62338
0.034206
0.094112
0.030636
0.0051517
0.034206
0.094112
0.030636
-0.034026
1.50E-12
-0.25364
8.05E-12
4.86E-11
0
0
0.0014395
0.00763
0.0014395
0.00763
9.26E-11
-4.61E-12
7.85E-12
-5.844
-8.63E-12
7.23E-12
9.33E-12
-0.33759
1.05E-05
5.27E-06
0
5.27E-06
9.8478
0
4.22E-05
5.27E-06
-70.121
0
1.86E-11
0.00763
1.17E-13
1.79E-11
99.14
4.7909
5.27E-06
0
-5.50E-10
0.16745
0.25364
5.27E-06
0
0.099395
0.099395
2.0714
2.0714
0.10611
0.21417
2.0714
0.21417
0
9.33E-12
0.00763
0.0014395
0.00763
-0.0014395
2.0714
0.21417
24.692
9.07E-12
2.23E-10
4.8894
0.58417
0.021413
0
5.0336
5.0336
0.021413
0
42.88
-6.64E-14
0.11454
-6.71E-12
-1.22E-11
0
-0.11454
6.71E-12
-1.22E-11
0
0
0
67.413
-3.33E-11
8.39E-11
0
1.58E-05
0
0
0
5.27E-06
2.11E-05
1.05E-05
3.23E-13
-0.12334
0
0
0.018413
0.035113
0.035134
0.009631
0.009631
-3.5365
-3.4132
0.0062432
0.0062432
0
-1.10E-11
0.34012
1.85E-11
0.015292
0.45647
-0.45647
0
0.29998
0
3.05E-11
5.37E-11
-1.10E-11
-1.10E-11
2.64E-06
2.64E-06
0
0
0
0
0
0.58417
0.58417
0.77677
-0.091984
-3.98E-12
-1.10E-11
0
9.26E-11
-3.07E-11
-1.01E-11
5.27E-06
5.27E-06
-48.043
-24.692
-40.413
-0.29998
0.34012
-1.4762
0
0
0.046254
0.006201
0.0059953
0.017453
0.011616
0.011585
0.0058213
0.016341
0.016341
0.016341
-17.464
0.45647
0
5.27E-06
-0.038213
0.68478
1.37E-11
0
5.27E-06
0
-1.4762
-2.0604
7.85E-12
0
0.019262
0.0058319
0.0058002
0.0058213
0.0057844
0
0
0
5.27E-06
5.27E-06
191.55
0.4079
0.16467
0.1989
0.040132
0
0
0.053056
0.053056
0.053056
-1.42E-12
1.60E-12
0
0
-0.16745
3.09E-12
0.0051991
0.10471
0.10471
0.2345
0.45812
0.10471
0.10471
0.0051991
0.21462
0.21462
0.0051517
0.2345
0.22363
-2.67E-14
0.01242
0.01242
0.40815
0.11564
0
0.0051517
0.0051517
0.10471
0.10471
0.0051517
0.0051517
0.0051991
0.0051517
0.808
0
5.27E-06
5.27E-06
0
0
0
0.808
-0.019262
2.40E-11
-1.0853
1.14E-10
-1.22E-11
0
0
0
5.2729
0
0
0
0
0
0
0
0
0
0
0
0
0
0
0
0
0
0
0
0
0
 ];
