# Supplementary material for: Modeling Phenotypic Metabolic Adaptations of Mycobacterium tuberculosis H37Rv under Hypoxia
Source: PLoS Comput Biol. 2012 Sep 13;8(9):e1002688. doi: 10.1371/journal.pcbi.1002688 (PMC3441462; doi:10.1371/journal.pcbi.1002688)
Supplement: Protocol S1 — MATLAB-formatted models of metabolism for M. tuberculosis HR37v and its Δ dosR deletion mutant. (ZIP) [file pcbi.1002688.s001.zip › README.pdf]

## System requirements:

To run the attached MATLAB scripts, the software packages below have to be installed on the computer.

| Software                                                                     | Developer                                                                                          | Related website                                                                                                                    |
|------------------------------------------------------------------------------|----------------------------------------------------------------------------------------------------|------------------------------------------------------------------------------------------------------------------------------------|
| MATLAB2010<br>or 2011                                                        | MathWorks, Inc.                                                                                    | <a href="http://www.mathworks.com/">http://www.mathworks.com/</a>                                                                  |
| The COConstraints<br>Based Reconstruction<br>and Analysis<br>(COBRA) Toolbox | Systems Biology<br>Research Group at<br>University of<br>California, San Diego                     | <a href="http://opencobra.sourceforge.net/openCOBRA/Welcome.html">http://opencobra.sourceforge.net/openCOBRA/<br/>Welcome.html</a> |
| GNU Linear<br>Programming Kit<br>(GLPK)                                      | Free Software<br>Foundation, Inc.                                                                  | <a href="http://www.gnu.org/software/glpk/">http://www.gnu.org/software/glpk/</a>                                                  |
| MATLAB Interface<br>for GLPK                                                 | Nicolo Giorgetti                                                                                   | <a href="http://glpkmex.sourceforge.net/">http://glpkmex.sourceforge.net/</a>                                                      |
| libSBML                                                                      | Sarah Keating, Akiya<br>Jouraku, Frank<br>Bergmann, Ben<br>Bornstein, Michael<br>Hucka, and others | <a href="http://sbml.org/Software/libSBML">http://sbml.org/Software/libSBML</a>                                                    |
| SBMLToolbox                                                                  | Keating, S. M.,<br>Bornstein, B. J.,<br>Finney, A., and<br>Hucka M.                                | <a href="http://sbml.org/Software/SBMLToolbox">http://sbml.org/Software/SBMLToolbox</a>                                            |

## How to run the attached MATLAB scripts:

- 1) Install the above software packages by following the instructions in the provided links;
- 2) Unzip all files attached with this article to a work directory;
- 3) Open MATLAB;

- 4) Change “Current Folder” in the MATLAB environment to the directory where COBRA Toolbox was installed;
- 5) In the command window of the MATLAB environment, run the command  
“initCobraToolbox”;
- 6) Change “Current Folder” in the MATLAB environment to the work directory where the files attached with this article were placed;
- 7) In the command window of the MATLAB environment, run the command  
“genelistdosRWT\_relative061012” to calculate the metabolic response of wild type *Mycobacterium tuberculosis* to hypoxia;
- 8) In the command window of the MATLAB environment, run the command  
“genelistdosRKO\_relative061012” to calculate the  $\Delta dosR$  gene deletion mutant of *Mycobacterium tuberculosis* to hypoxia.

## Disclaimer

The supplemented script codes and other related files are provided “as is” and “with all faults.” We, the authors of the related manuscript, make no representations or warranties of any kind concerning the safety, suitability, lack of viruses, inaccuracies, typographical errors, or other harmful components of the supplemented files. There are inherent dangers in the use of any software, and you are solely responsible for determining whether the supplemented files are compatible with your equipment and other software installed on your equipment. You are also solely responsible for the protection of your equipment and backup of your data, and we will not be liable for any damages you may suffer in connection with using, modifying, or distributing the supplemented files.
