# Supplementary material for: Modeling Phenotypic Metabolic Adaptations of Mycobacterium tuberculosis H37Rv under Hypoxia
Source: PLoS Comput Biol. 2012 Sep 13;8(9):e1002688. doi: 10.1371/journal.pcbi.1002688 (PMC3441462; doi:10.1371/journal.pcbi.1002688)
Supplement: Protocol S1 — MATLAB-formatted models of metabolism for M. tuberculosis HR37v and its Δ dosR deletion mutant. (ZIP) [file pcbi.1002688.s001.zip › runloopless1_new.m]

minFall3_new = minFall1_new;
maxFall3_new = maxFall1_new;

%loopless solution
% specific to iNJ661m
cyclenum = 26;  
cycles = zeros(net_rlen,cyclenum);
% loops
cycles(418,1) = 1; %FRD
cycles(419,1) = -1; %FRD2
cycles(420,2) = 1; %FRD5
cycles(421,2) = -1; %FRD2+FRD3+SUCD1i
cycles(419,19) = 1; %FRD2
cycles(420,19) = -1; %FRD3
cycles(421,20) = 1; %FRD2
cycles(928,20) = 1; %SUCD1i

cycles(679,3) = 1;  
cycles(38,3) = -1; 
cycles(40,3) = 1;
cycles(687,4) = 1;  
cycles(38,4) = -1; 
cycles(41,4) = 1;
cycles(823,5) = 1;  
cycles(38,5) = -1; 
cycles(39,5) = 1;
cycles(823,6) = 1;  
cycles(39,6) = 1;
cycles(687,6) = -1;  
cycles(41,6) = -1;
cycles(823,7) = 1;  
cycles(39,7) = 1;
cycles(679,7) = -1;  
cycles(40,7) = -1;

cycles(505,8) = 1;  
cycles(666,8) = 1; 
cycles(667,8) = -1;

cycles(769,9) = 1;  
cycles(816,9) = -1;

cycles(478,10) = 1;  
cycles(75,10) = 1; 
cycles(73,10) = -1;

cycles(763,11) = 1;  
cycles(764,11) = -1; 

cycles(639,12) = 1;  
cycles(640,12) = -1;

cycles(538,13) = 1;  
cycles(539,13) = -1;

cycles(674,14) = 1;  
cycles(945,14) = -1;

cycles(422,15) = 1; 
cycles(423,15) = -1;

cycles(793,16) = 1; 
cycles(794,16) = -1;

cycles(1019,17) = 1; 
cycles(1012,17) = -1;

cycles(171,18) = 1; 
cycles(952,18) = -1;

cycles(294,21) = -1; 
cycles(519,21) = 1;
cycles(272,21) = -1; 
cycles(153,21) = 1;
cycles(517,21) = 1; 
cycles(518,21) = -1;
cycles(293,21) = 1;

cycles(177,22) = 1;
cycles(917,22) = 1; 
cycles(918,22) = -1;

cycles(428,23) = 1;
cycles(65,23) = 1; 
cycles(66,23) = -1;

cycles(858,24) = -1;
cycles(22,24) = 1; 
cycles(929,24) = -1;
cycles(10,24) = 1; 
cycles(726,24) = -1;

cycles(570,25) = 1;
cycles(675,25) = -1; 
cycles(678,25) = -1;

cycles(228,26) = 1;
cycles(229,26) = -1;

%cycles(669,3) = 1; %NADH2r
%cycles(873,3) = -1; %QRr

cycles1 = cycles;
cyclenum1 = cyclenum;
cyclevar1 = zeros(net_rlen,1);
for i = 1:cyclenum1
    for j = 1:net_rlen
        if cycles1(j,i)~=0
            cyclevar1(j)=1;
        end;
    end;
end;
h = waitbar(0,'calculating loopless fluxes ...');
for ridid = 1:length(newrxnset) %1:net_rlen
    rid = newrxnset(ridid);
    if cyclevar1(rid)~=0
        waitbar(rid/net_rlen,h);
        % find the cycles
        cycle_rxn = zeros(cyclenum1,1);
        for j = 1:cyclenum1
            if cycles1(rid,j)~=0
                cycle_rxn(j) = 1;
            end;
        end;
        if max(cycle_rxn([ 1 2 19 20 ]))==1
            cycle_rxn([ 1 2 19 20 ]) = 1;
        end;
        if max(cycle_rxn([ 3 4 5 6 7 ]))==1
            cycle_rxn([ 3 4 5 6 7 9 ]) = 1;
        end;
        if max(cycle_rxn([ 14 ]))==1
            cycle_rxn([ 12 13 14 15 16 1 2 19 20 ]) = 1;
        end;
        
        cyclenum = sum(cycle_rxn);
        cycles = cycles1(:,find(cycle_rxn));
        %cyclenum
        %sparse(cycles)
        
        
        cyclevar = zeros(net_rlen,1);
        %cycles = zeros(net_rlen,cyclenum);
        % calculate loopless solution
        for i = 1:cyclenum
            for j = 1:net_rlen
                if cycles(j,i)~=0
                    cyclevar(j)=1;
                end;
            end;
        end;
        ninrlen = sum(cyclevar);
        % objective function
        milp_c = zeros(net_rlen+ninrlen*2,1);
        %milp_c(bio_id) = 1;
        % constraints
        milp_a = sparse(zeros(net_mlen+ninrlen*4+cyclenum,net_rlen+ninrlen*2));
        milp_b = zeros(net_mlen+ninrlen*4+cyclenum,1);
        % stoichiometry
        for i = 1:net_mlen
            for j = 1:net_rlen
                milp_a(i,j) = modelTBCm_new.S(i,j);
            end;
        end;
        % -1000(1-a)<= v <= 1000a
        % -1000(1-a)<= v SO -v+1000a <= 1000
        rxnindex = 0;
        for i = 1:net_rlen
            if cyclevar(i)==1
                rxnindex = rxnindex+1;
                milp_a(net_mlen+rxnindex,i) = -1; %v
                milp_a(net_mlen+rxnindex,net_rlen+ninrlen+rxnindex) = 3000; %a
                milp_b(net_mlen+rxnindex) = 3000; % b=1000
            end;
        end;
        rxnindex;
        % v <= 1000a SO v-1000a <= 0
        rxnindex = 0;
        for i = 1:net_rlen
            if cyclevar(i)==1
                rxnindex = rxnindex+1;
                milp_a(net_mlen+ninrlen+rxnindex,i) = 1; %v
                milp_a(net_mlen+ninrlen+rxnindex,net_rlen+ninrlen+rxnindex) = -3000; %a
            end;
        end;
        rxnindex;
        % -1000a+1(1-a)<= G <= -1a+1000(1-a)
        % -1000a+1(1-a)<= G SO -G-1001a <= -1
        rxnindex = 0;
        for i = 1:net_rlen
            if cyclevar(i)==1
                rxnindex = rxnindex+1;
                milp_a(net_mlen+ninrlen*2+rxnindex,net_rlen+rxnindex) = -1; %G
                milp_a(net_mlen+ninrlen*2+rxnindex,net_rlen+ninrlen+rxnindex) = -3001; %a
                milp_b(net_mlen+ninrlen*2+rxnindex) = -1; % b=-1
            end;
        end;
        rxnindex;
        % G <= -1a+1000(1-a) SO G+1001a <= 1000
        rxnindex = 0;
        for i = 1:net_rlen
            if cyclevar(i)==1
                rxnindex = rxnindex+1;
                milp_a(net_mlen+ninrlen*3+rxnindex,net_rlen+rxnindex) = 1; %G
                milp_a(net_mlen+ninrlen*3+rxnindex,net_rlen+ninrlen+rxnindex) = 3001; %a
                milp_b(net_mlen+ninrlen*3+rxnindex) = 3000; % b=1000
            end;
        end;
        rxnindex;
        % loop thermal
        for i = 1:cyclenum
            rxnindex = 0;
            for j = 1:net_rlen
                if cyclevar(j)==1
                    rxnindex = rxnindex+1;
                    milp_a(net_mlen+ninrlen*4+i,net_rlen+rxnindex) = cycles(j,i);
                    milp_b(net_mlen+ninrlen*4+i) = 0;
                end;
            end;
        end;
        % lower and upper limit
        milp_lb = [ modelTBCm_new.lb; -3000*ones(ninrlen,1); zeros(ninrlen,1) ];
        milp_ub = [ modelTBCm_new.ub; 3000*ones(ninrlen,1); ones(ninrlen,1) ];
        % constraint type
        milp_ctype = 'S';
        for i = 1:net_mlen+ninrlen*4+cyclenum
            if (i <= net_mlen)
                milp_ctype(i) = 'S';
            end;
            if (i>net_mlen && i<=net_mlen+ninrlen*4)
                milp_ctype(i) = 'U';
            end;
            if (i>=net_mlen+ninrlen*4+1)
                milp_ctype(i) = 'S';
            end;
        end;
        % variable type
        milp_vartype = 'C';
        for i = 1:net_rlen+ninrlen*2
            if i <= net_rlen+ninrlen
                milp_vartype(i) = 'C';
            else
                milp_vartype(i) = 'B';
            end;
        end;

        %milp_lb(bio_id)= refbiomass;
        
        
        milp_c = zeros(net_rlen+ninrlen*2,1);
        milp_c(rid) = 1;
        milp_sense = 1; % 1 = min -1 = max
        [xopt, fmin1, status1, extra] = lpxf_b1 (milp_c, milp_a, milp_b, milp_lb, milp_ub, milp_ctype, milp_vartype, milp_sense);
        milp_sense = -1; % 1 = min -1 = max
        [xopt, fmax1, status2, extra] = lpxf_b1 (milp_c, milp_a, milp_b, milp_lb, milp_ub, milp_ctype, milp_vartype, milp_sense);
        minFall3_new(rid) = fmin1;
        maxFall3_new(rid) = fmax1;
        status_new(rid,1) = status1;
        status_new(rid,2) = status2;
        [ rid fmin1 fmax1 status1 status2 ];
        
        %end;
    end;
    
end;
close(h);
