# Supplementary material for: Modeling Phenotypic Metabolic Adaptations of Mycobacterium tuberculosis H37Rv under Hypoxia
Source: PLoS Comput Biol. 2012 Sep 13;8(9):e1002688. doi: 10.1371/journal.pcbi.1002688 (PMC3441462; doi:10.1371/journal.pcbi.1002688)
Supplement: Table S1 — Biomass production and cellular lysis rates for simulating growth of wild type M. tuberculosis H37Rv and the Δ dosR deletion mutant under normoxia and hypoxia. (PDF) [file pcbi.1002688.s002.pdf]

**Supplemental Table S1: Biomass production and cellular lysis rates for simulating growth of wild type *Mycobacterium tuberculosis* H37Rv and the  $\Delta dosR$  deletion mutant under normoxia and hypoxia.**

|                           | Biomass production rate (h <sup>-1</sup> ) |                      | Lysis rate (h <sup>-1</sup> ) |
|---------------------------|--------------------------------------------|----------------------|-------------------------------|
|                           | Wild type                                  | $\Delta dosR$        |                               |
| Normoxia ( $\leq 4$ days) | $5.2 \times 10^{-2}$                       | $5.2 \times 10^{-2}$ | $1.2 \times 10^{-2}$          |
| Hypoxia ( $\geq 6$ days)  | $1.1 \times 10^{-2}$                       | $1.4 \times 10^{-5}$ | $1.2 \times 10^{-2}$          |
