# Supplementary material for: Modeling Phenotypic Metabolic Adaptations of Mycobacterium tuberculosis H37Rv under Hypoxia
Source: PLoS Comput Biol. 2012 Sep 13;8(9):e1002688. doi: 10.1371/journal.pcbi.1002688 (PMC3441462; doi:10.1371/journal.pcbi.1002688)
Supplement: Table S2 — Predictions of the hypoxia-induced changes in biomass composition of wild type M. tuberculosis H37Rv and the Δ dosR deletion mutant. Normoxic coefficients were set to be the same as the original coefficients of the corresponding metabolites in the biomass function of the iNJ661m metabolic network [42]. The hypoxic coefficients were predicted by integrating the metabolic network with gene expression data for the wild type strain (or the ΔdosR deletion mutant strain) of Mycobacterium tuberculosis H37Rv under hypoxia [25]. Changes in the coefficients indicated an altered biomass composition of M. tuberculosis H37Rv upon exposure to hypoxia. “Increase” (or “Decrease”) indicated that a predicted hypoxic coefficient was greater (or smaller) than the corresponding normoxic coefficient. (PDF) [file pcbi.1002688.s003.pdf]

**Supplemental Table S2: Predicted hypoxia-induced changes in biomass composition of wild type *Mycobacterium tuberculosis* H37Rv and the  $\Delta dosR$  deletion mutant.**

Normoxic coefficients were set to be the same as the original coefficients of the corresponding metabolites in the biomass function of the *iNJ661m* metabolic network [42]. The hypoxic coefficients were predicted by integrating the metabolic network with gene expression data for the wild type strain (or the  $\Delta dosR$  deletion mutant strain) of *Mycobacterium tuberculosis* H37Rv under hypoxia [25]. Changes in the coefficients indicated an altered biomass composition of *M. tuberculosis* H37Rv upon exposure to hypoxia. “Increase” (or “Decrease”) indicated that a predicted hypoxic coefficient was greater (or smaller) than the corresponding normoxic coefficient.

| Index | Metabolite name                                   | Normoxic coefficient in biomass | Wild type                      |                           | $\Delta dosR$                  |                           | Note                                                       |
|-------|---------------------------------------------------|---------------------------------|--------------------------------|---------------------------|--------------------------------|---------------------------|------------------------------------------------------------|
|       |                                                   |                                 | Hypoxic coefficient in biomass | Change in the coefficient | Hypoxic coefficient in biomass | Change in the coefficient |                                                            |
| 1     | Acyl phosphatidylinositol mannoside               | $1.7 \times 10^{-3}$            | $5.4 \times 10^{-3}$           | Increase                  | $6.6 \times 10^{-3}$           | Increase                  | Phosphatidylinositol mannosides, cell-wall components [57] |
| 2     | Acyl phosphatidylinositol mannoside di-mannose    | $1.5 \times 10^{-3}$            | $4.7 \times 10^{-3}$           | Increase                  | $5.8 \times 10^{-3}$           | Increase                  |                                                            |
| 3     | Acyl phosphatidylinositol mannoside tri-mannose   | $1.3 \times 10^{-3}$            | $4.3 \times 10^{-3}$           | Increase                  | $5.2 \times 10^{-3}$           | Increase                  |                                                            |
| 4     | Acyl phosphatidylinositol mannoside tetra-mannose | $1.2 \times 10^{-3}$            | $3.9 \times 10^{-3}$           | Increase                  | $4.7 \times 10^{-3}$           | Increase                  |                                                            |
| 5     | Di-acyl phosphatidylinositol mannoside di-mannose | $1.3 \times 10^{-3}$            | $4.1 \times 10^{-3}$           | Increase                  | $5.0 \times 10^{-3}$           | Increase                  |                                                            |
| 6     | Phosphatidylinositol mannoside                    | $2.1 \times 10^{-3}$            | $6.6 \times 10^{-3}$           | Increase                  | $8.1 \times 10^{-3}$           | Increase                  |                                                            |
| 7     | Phosphatidylinositol mannoside di-mannose         | $1.8 \times 10^{-3}$            | $5.7 \times 10^{-3}$           | Increase                  | $7.0 \times 10^{-3}$           | Increase                  |                                                            |
| 8     | Phosphatidylinositol mannoside tri-mannose        | $1.6 \times 10^{-3}$            | $5.0 \times 10^{-3}$           | Increase                  | $6.1 \times 10^{-3}$           | Increase                  |                                                            |
| 9     | Phosphatidylinositol mannoside tetra-mannose      | $1.4 \times 10^{-3}$            | $4.5 \times 10^{-3}$           | Increase                  | $5.5 \times 10^{-3}$           | Increase                  |                                                            |
| 10    | Phosphatidylinositol mannoside penta-mannose      | $1.3 \times 10^{-3}$            | $4.1 \times 10^{-3}$           | Increase                  | $4.9 \times 10^{-3}$           | Increase                  |                                                            |
| 11    | Phosphatidylinositol mannoside hexa-mannose       | $1.2 \times 10^{-3}$            | $3.7 \times 10^{-3}$           | Increase                  | $4.5 \times 10^{-3}$           | Increase                  |                                                            |

|    |                                                                                                                  |                      |                      |          |                      |          |                                                              |
|----|------------------------------------------------------------------------------------------------------------------|----------------------|----------------------|----------|----------------------|----------|--------------------------------------------------------------|
| 12 | Undecaprenyl-diphospho-N-acetylmuramoyl-N-acetylglucosamine-L-alanyl-D-glutamyl-L-lysyl-D-alanyl-D-alanine       | $1.0 \times 10^{-3}$ | $2.1 \times 10^{-3}$ | Increase | $2.4 \times 10^{-3}$ | Increase | Precursors of peptidoglycan, a cell-wall component [56]      |
| 13 | Undecaprenyl-diphospho-N-acetylmuramoyl-N-acetylglucosamine-L-alanyl-gamma-D-glutamyl-L-lysyl-D-alanyl-D-alanine | $1.0 \times 10^{-3}$ | $2.1 \times 10^{-3}$ | Increase | $2.4 \times 10^{-3}$ | Increase |                                                              |
| 14 | Undecaprenyl-diphospho-N-acetylmuramoyl-N-acetylglucosamine-L-ala-D-glu-meso-2-6-diaminopimeloyl-D-ala-D-ala     | $9.9 \times 10^{-4}$ | $2.1 \times 10^{-3}$ | Increase | $2.4 \times 10^{-3}$ | Increase |                                                              |
| 15 | Undecaprenyl-diphospho-N-glycolylmuramoyl-N-acetylglucosamine-L-ala-D-glu-meso-2-6-diaminopimeloyl-D-ala-D-ala   | $9.8 \times 10^{-4}$ | $2.1 \times 10^{-3}$ | Increase | $2.3 \times 10^{-3}$ | Increase |                                                              |
| 16 | Peptidoglycan subunit1                                                                                           | $1.9 \times 10^{-2}$ | $4.0 \times 10^{-2}$ | Increase | $4.5 \times 10^{-2}$ | Increase |                                                              |
| 17 | Peptidoglycan subunit2                                                                                           | $1.9 \times 10^{-2}$ | $4.0 \times 10^{-2}$ | Increase | $4.5 \times 10^{-2}$ | Increase |                                                              |
| 18 | Keto mycolate (2 cyclopropanated rings)                                                                          | $3.3 \times 10^{-3}$ | $8.2 \times 10^{-3}$ | Increase | $1.1 \times 10^{-2}$ | Increase | Mycolates and related derivatives, cell-wall components [56] |
| 19 | Keto mycolate (1 cyclopropanated ring)                                                                           | $3.3 \times 10^{-3}$ | $8.1 \times 10^{-3}$ | Increase | $5.0 \times 10^{-7}$ | Decrease |                                                              |
| 20 | Methoxy mycolate (1 cyclopropanated ring)                                                                        | $3.4 \times 10^{-3}$ | $8.3 \times 10^{-3}$ | Increase | $5.0 \times 10^{-7}$ | Decrease |                                                              |
| 21 | Mycolate (2 cyclopropanated rings)                                                                               | $1.1 \times 10^{-2}$ | $2.7 \times 10^{-2}$ | Increase | $3.7 \times 10^{-2}$ | Increase |                                                              |
| 22 | Tetramycolyl hexaarabinoside 1                                                                                   | $1.1 \times 10^{-3}$ | $2.7 \times 10^{-3}$ | Increase | $3.7 \times 10^{-3}$ | Increase |                                                              |
| 23 | Tetramycolyl hexaarabinoside 2                                                                                   | $1.1 \times 10^{-3}$ | $2.7 \times 10^{-3}$ | Increase | $3.7 \times 10^{-3}$ | Increase |                                                              |
| 24 | Tetramycolyl hexaarabinoside 3                                                                                   | $1.1 \times 10^{-3}$ | $2.7 \times 10^{-3}$ | Increase | $3.7 \times 10^{-3}$ | Increase |                                                              |
| 25 | Tetramycolyl hexaarabinoside 4                                                                                   | $1.1 \times 10^{-3}$ | $2.7 \times 10^{-3}$ | Increase | $1.3 \times 10^{-3}$ | Increase |                                                              |

|    |                                                    |                      |                      |          |                      |           |             |
|----|----------------------------------------------------|----------------------|----------------------|----------|----------------------|-----------|-------------|
| 26 | Adenosine monophosphate (AMP)                      | $1.4 \times 10^{-1}$ | $1.8 \times 10^{-1}$ | Increase | $1.4 \times 10^{-1}$ | No change | Nucleotides |
| 27 | Guanosine monophosphate (GMP)                      | $2.4 \times 10^{-1}$ | $3.1 \times 10^{-1}$ | Increase | $3.2 \times 10^{-1}$ | Increase  |             |
| 28 | Deoxyadenosine monophosphate (dAMP)                | $3.5 \times 10^{-3}$ | $6.1 \times 10^{-3}$ | Increase | $3.5 \times 10^{-3}$ | No change |             |
| 29 | Deoxyguanosine monophosphate (dGMP)                | $6.7 \times 10^{-3}$ | $8.5 \times 10^{-3}$ | Increase | $8.8 \times 10^{-3}$ | Increase  |             |
| 30 | Deoxythymidine monophosphate (dTMP)                | $3.7 \times 10^{-3}$ | $6.4 \times 10^{-3}$ | Increase | $3.7 \times 10^{-3}$ | No change |             |
| 31 | L-Cysteine                                         | $2.2 \times 10^{-2}$ | $1.6 \times 10^{-2}$ | Decrease | $2.2 \times 10^{-2}$ | No change | Amino acids |
| 32 | Glycine                                            | $3.4 \times 10^{-1}$ | $5.0 \times 10^{-7}$ | Decrease | $5.0 \times 10^{-7}$ | Decrease  |             |
| 33 | L-Methionine                                       | $3.5 \times 10^{-2}$ | $2.5 \times 10^{-2}$ | Decrease | $3.5 \times 10^{-2}$ | No change |             |
| 34 | L-Phenylalanine                                    | $4.8 \times 10^{-2}$ | $2.2 \times 10^{-2}$ | Decrease | $2.0 \times 10^{-2}$ | Decrease  |             |
| 35 | L-Serine                                           | $1.4 \times 10^{-1}$ | $1.0 \times 10^{-1}$ | Decrease | $1.4 \times 10^{-1}$ | No change |             |
| 36 | L-Tryptophan                                       | $2.0 \times 10^{-2}$ | $1.5 \times 10^{-2}$ | Decrease | $2.0 \times 10^{-2}$ | No change |             |
| 37 | L-Tyrosine                                         | $3.2 \times 10^{-2}$ | $1.4 \times 10^{-2}$ | Decrease | $1.3 \times 10^{-2}$ | Decrease  | Cofactors   |
| 38 | 5-6-7-8-Tetrahydrofolate                           | $1.0 \times 10^{-6}$ | $1.8 \times 10^{-6}$ | Increase | $2.3 \times 10^{-6}$ | Increase  |             |
| 39 | 7-8-Dihydrofolate                                  | $1.0 \times 10^{-6}$ | $1.8 \times 10^{-6}$ | Increase | $2.3 \times 10^{-6}$ | Increase  |             |
| 40 | Menaquinol-8                                       | $1.0 \times 10^{-6}$ | $1.9 \times 10^{-6}$ | Increase | $1.0 \times 10^{-6}$ | No change |             |
| 41 | Nicotinamide adenine dinucleotide (NAD)            | $1.0 \times 10^{-6}$ | $2.8 \times 10^{-6}$ | Increase | $3.1 \times 10^{-6}$ | Increase  |             |
| 42 | Nicotinamide adenine dinucleotide phosphate (NADP) | $1.0 \times 10^{-6}$ | $2.8 \times 10^{-6}$ | Increase | $3.1 \times 10^{-6}$ | Increase  |             |
| 43 | Quinolate                                          | $1.0 \times 10^{-6}$ | $2.8 \times 10^{-6}$ | Increase | $3.1 \times 10^{-6}$ | Increase  |             |
| 44 | Protoheme                                          | $1.0 \times 10^{-6}$ | $2.5 \times 10^{-6}$ | Increase | $3.2 \times 10^{-6}$ | Increase  |             |
| 45 | Thiamin                                            | $1.0 \times 10^{-6}$ | $1.9 \times 10^{-6}$ | Increase | $2.3 \times 10^{-6}$ | Increase  |             |
| 46 | Hydroxymethylbilane                                | $1.0 \times 10^{-6}$ | $1.9 \times 10^{-6}$ | Increase | $2.6 \times 10^{-6}$ | Increase  |             |
| 47 | Flavin mononucleotide                              | $1.0 \times 10^{-6}$ | $1.3 \times 10^{-6}$ | Increase | $1.3 \times 10^{-6}$ | Increase  |             |
| 48 | Riboflavin                                         | $1.0 \times 10^{-6}$ | $1.3 \times 10^{-6}$ | Increase | $1.3 \times 10^{-6}$ | Increase  |             |
| 49 | Pantetheine 4'-phosphate                           | $1.0 \times 10^{-6}$ | $7.2 \times 10^{-7}$ | Decrease | $1.0 \times 10^{-6}$ | No change |             |

|    |                                                    |                      |                      |           |                      |           |       |
|----|----------------------------------------------------|----------------------|----------------------|-----------|----------------------|-----------|-------|
| 50 | Iron-III-chelated carboxymycobactin-T              | $1.5 \times 10^{-3}$ | $1.0 \times 10^{-3}$ | Decrease  | $1.5 \times 10^{-3}$ | No change | Other |
| 51 | Phenolic glycolipid                                | $1.2 \times 10^{-3}$ | $1.2 \times 10^{-3}$ | No change | $6.6 \times 10^{-4}$ | Decrease  |       |
| 52 | Phosphatidylethanolamine (dihexadecanoyl, n-C16:0) | $4.1 \times 10^{-3}$ | $2.9 \times 10^{-3}$ | Decrease  | $4.1 \times 10^{-3}$ | No change |       |
| 53 | Phenol phthiocerol dimycocerosate                  | $2.6 \times 10^{-4}$ | $2.6 \times 10^{-4}$ | No change | $1.5 \times 10^{-4}$ | Decrease  |       |
